# Supplementary material
Source: publisher figshare collection journal article supplement (https://acs.figshare.com/ndownloader/files/6501459)
Supplement: Supplementary file 1 [file 6501459]

 
data_mo_dd51a1_sq
 
_audit_creation_method            'SHELXL-2014/7'
_shelx_SHELXL_version_number      '2014/7'
_chemical_name_systematic         ?
_chemical_name_common             ?
_chemical_melting_point           ?
_chemical_formula_moiety          ?
_chemical_formula_sum
 'C162 H76' 
_chemical_formula_weight          2022.22

loop_
 _atom_type_symbol
 _atom_type_description
 _atom_type_scat_dispersion_real
 _atom_type_scat_dispersion_imag
 _atom_type_scat_source
 'C'  'C'   0.0033   0.0016
 'International Tables Vol C Tables 4.2.6.8 and 6.1.1.4'
 'H'  'H'   0.0000   0.0000
 'International Tables Vol C Tables 4.2.6.8 and 6.1.1.4'
 
_space_group_crystal_system       orthorhombic
_space_group_IT_number            62
_space_group_name_H-M_alt         'P n m a'
_space_group_name_Hall            '-P 2ac 2n'
 
_shelx_space_group_comment
;
The symmetry employed for this shelxl refinement is uniquely defined
by the following loop, which should always be used as a source of
symmetry information in preference to the above space-group names.
They are only intended as comments.
;
 
loop_
 _space_group_symop_operation_xyz
 'x, y, z'
 '-x+1/2, -y, z+1/2'
 '-x, y+1/2, -z'
 'x+1/2, -y+1/2, -z+1/2'
 '-x, -y, -z'
 'x-1/2, y, -z-1/2'
 'x, -y-1/2, z'
 '-x-1/2, y-1/2, z-1/2'
 
_cell_length_a                    43.9606(10)
_cell_length_b                    24.3886(7)
_cell_length_c                    9.8380(2)
_cell_angle_alpha                 90
_cell_angle_beta                  90
_cell_angle_gamma                 90
_cell_volume                      10547.7(4)
_cell_formula_units_Z             4
_cell_measurement_temperature     293(2)
_cell_measurement_reflns_used     ?
_cell_measurement_theta_min       ?
_cell_measurement_theta_max       ?
 
_exptl_crystal_description        ?
_exptl_crystal_colour             ?
_exptl_crystal_density_meas       ?
_exptl_crystal_density_method     ?
_exptl_crystal_density_diffrn     1.273          
_exptl_crystal_F_000              4192
_exptl_transmission_factor_min    ?
_exptl_transmission_factor_max    ?
_exptl_crystal_size_max           ?
_exptl_crystal_size_mid           ?
_exptl_crystal_size_min           ?
_exptl_absorpt_coefficient_mu     0.072
_shelx_estimated_absorpt_T_min    ?
_shelx_estimated_absorpt_T_max    ?
_exptl_absorpt_correction_type    ?
_exptl_absorpt_correction_T_min   ?
_exptl_absorpt_correction_T_max   ?
_exptl_absorpt_process_details    ?
_exptl_absorpt_special_details    ?
_diffrn_ambient_temperature       293(2)
_diffrn_radiation_wavelength      0.71073
_diffrn_radiation_type            MoK\a
_diffrn_source                    ?
_diffrn_measurement_device_type   ?
_diffrn_measurement_method        ?
_diffrn_detector_area_resol_mean  ?
_diffrn_reflns_number             72637
_diffrn_reflns_av_unetI/netI      0.0296
_diffrn_reflns_av_R_equivalents   0.0789
_diffrn_reflns_limit_h_min        -43
_diffrn_reflns_limit_h_max        43
_diffrn_reflns_limit_k_min        -24
_diffrn_reflns_limit_k_max        24
_diffrn_reflns_limit_l_min        -9
_diffrn_reflns_limit_l_max        9
_diffrn_reflns_theta_min          2.032
_diffrn_reflns_theta_max          20.815
_diffrn_reflns_theta_full         20.815
_diffrn_measured_fraction_theta_max   0.999
_diffrn_measured_fraction_theta_full  0.999
_diffrn_reflns_Laue_measured_fraction_max    0.999
_diffrn_reflns_Laue_measured_fraction_full   0.999
_diffrn_reflns_point_group_measured_fraction_max   0.999
_diffrn_reflns_point_group_measured_fraction_full  0.999
_reflns_number_total              5682
_reflns_number_gt                 4460
_reflns_threshold_expression      'I > 2\s(I)'
_reflns_Friedel_coverage          0.000
_reflns_Friedel_fraction_max      .
_reflns_Friedel_fraction_full     .
 
_reflns_special_details
;
 Reflections were merged by SHELXL according to the crystal
 class for the calculation of statistics and refinement.
 
 Structure factors included contributions from the .fab file.
 
 _reflns_Friedel_fraction is defined as the number of unique
 Friedel pairs measured divided by the number that would be
 possible theoretically, ignoring centric projections and
 systematic absences.
;
 
_computing_data_collection        ?
_computing_cell_refinement        ?
_computing_data_reduction         ?
_computing_structure_solution     ?
_computing_structure_refinement 'SHELXL-2014/7 (Sheldrick, 2014)'
_computing_molecular_graphics     ?
_computing_publication_material   ?
_refine_special_details           ?
_refine_ls_structure_factor_coef  Fsqd
_refine_ls_matrix_type            full
_refine_ls_weighting_scheme       calc
_refine_ls_weighting_details
'w=1/[\s^2^(Fo^2^)+(0.1000P)^2^+10.0000P] where P=(Fo^2^+2Fc^2^)/3'
_atom_sites_solution_primary      ?
_atom_sites_solution_secondary    ?
_atom_sites_solution_hydrogens    geom
_refine_ls_hydrogen_treatment     constr
_refine_ls_extinction_method      none
_refine_ls_extinction_coef        .
_refine_ls_number_reflns          5682
_refine_ls_number_parameters      814
_refine_ls_number_restraints      632
_refine_ls_R_factor_all           0.0964
_refine_ls_R_factor_gt            0.0766
_refine_ls_wR_factor_ref          0.2170
_refine_ls_wR_factor_gt           0.2054
_refine_ls_goodness_of_fit_ref    1.261
_refine_ls_restrained_S_all       1.274
_refine_ls_shift/su_max           0.000
_refine_ls_shift/su_mean          0.000
 
loop_
 _atom_site_label
 _atom_site_type_symbol
 _atom_site_fract_x
 _atom_site_fract_y
 _atom_site_fract_z
 _atom_site_U_iso_or_equiv
 _atom_site_adp_type
 _atom_site_occupancy
 _atom_site_site_symmetry_order  
 _atom_site_calc_flag
 _atom_site_refinement_flags_posn
 _atom_site_refinement_flags_adp
 _atom_site_refinement_flags_occupancy
 _atom_site_disorder_assembly
 _atom_site_disorder_group
C1 C 0.71942(11) 0.2982(3) 0.2867(5) 0.0572(14) Uani 1 1 d . U . . .
C2 C 0.71977(15) 0.2500 0.3717(8) 0.0587(19) Uani 1 2 d S TU P . .
C3 C 0.70316(16) 0.2500 0.4925(7) 0.0575(19) Uani 1 2 d S TU P . .
C4 C 0.68571(11) 0.2975(2) 0.5320(5) 0.0539(13) Uani 1 1 d . U . . .
C5 C 0.65773(11) 0.2794(2) 0.5937(4) 0.0529(14) Uani 1 1 d . U . . .
C6 C 0.62983(11) 0.3095(2) 0.5810(5) 0.0498(13) Uani 1 1 d . U . . .
C7 C 0.60251(11) 0.2795(2) 0.5966(4) 0.0485(13) Uani 1 1 d . U . . .
C8 C 0.57444(11) 0.2979(2) 0.5381(5) 0.0512(13) Uani 1 1 d . U . . .
C9 C 0.55632(15) 0.2500 0.5013(7) 0.0486(17) Uani 1 2 d S TU P . .
C10 C 0.53909(14) 0.2500 0.3820(7) 0.0490(18) Uani 1 2 d S TU P . .
C11 C 0.53898(11) 0.2976(2) 0.2956(5) 0.0499(13) Uani 1 1 d . U . . .
C12 C 0.53874(10) 0.2798(2) 0.1558(5) 0.0484(13) Uani 1 1 d . U . . .
C13 C 0.55542(11) 0.3083(2) 0.0583(5) 0.0502(13) Uani 1 1 d . U . . .
C14 C 0.57278(10) 0.2779(2) -0.0428(5) 0.0467(13) Uani 1 1 d . U . . .
C15 C 0.60083(11) 0.3077(2) -0.0659(5) 0.0497(13) Uani 1 1 d . U . . .
C16 C 0.62787(11) 0.2801(2) -0.0972(4) 0.0502(13) Uani 1 1 d . U . . .
C17 C 0.65549(11) 0.3081(2) -0.0685(5) 0.0531(13) Uani 1 1 d . U . . .
C18 C 0.68374(11) 0.2785(2) -0.0475(5) 0.0576(15) Uani 1 1 d . U . . .
C19 C 0.70190(11) 0.3083(3) 0.0504(5) 0.0583(14) Uani 1 1 d . U . . .
C20 C 0.71911(10) 0.2800(2) 0.1470(5) 0.0598(15) Uani 1 1 d . U . . .
C21 C 0.70279(12) 0.3446(2) 0.3236(6) 0.0594(14) Uani 1 1 d . U . . .
C22 C 0.68536(11) 0.3439(2) 0.4491(5) 0.0550(13) Uani 1 1 d . U . . .
C23 C 0.65744(12) 0.3735(2) 0.4261(6) 0.0578(14) Uani 1 1 d . U . . .
C24 C 0.62959(12) 0.3587(2) 0.4937(5) 0.0537(13) Uani 1 1 d . U . . .
C25 C 0.60204(12) 0.3735(2) 0.4291(5) 0.0526(13) Uani 1 1 d . U . . .
C26 C 0.57438(11) 0.3436(2) 0.4551(5) 0.0507(13) Uani 1 1 d . U . . .
C27 C 0.55638(11) 0.3439(2) 0.3314(5) 0.0507(13) Uani 1 1 d . U . . .
C28 C 0.57364(12) 0.3729(2) 0.2300(5) 0.0524(13) Uani 1 1 d . U . . .
C29 C 0.57312(11) 0.3553(2) 0.0963(5) 0.0496(13) Uani 1 1 d . U . . .
C30 C 0.60113(11) 0.3556(2) 0.0188(5) 0.0517(13) Uani 1 1 d . U . . .
C31 C 0.62831(11) 0.3771(2) 0.0731(5) 0.0524(13) Uani 1 1 d . U . . .
C32 C 0.65594(12) 0.3560(2) 0.0174(5) 0.0567(14) Uani 1 1 d . U . . .
C33 C 0.68437(11) 0.3559(2) 0.0913(5) 0.0589(14) Uani 1 1 d . U . . .
C34 C 0.68485(12) 0.3731(2) 0.2243(6) 0.0597(14) Uani 1 1 d . U . . .
C35 C 0.65675(13) 0.3918(2) 0.2877(6) 0.0582(14) Uani 1 1 d . U . . .
C36 C 0.62878(12) 0.3956(2) 0.2149(6) 0.0554(14) Uani 1 1 d . U . . .
C37 C 0.60158(12) 0.3912(2) 0.2907(5) 0.0526(13) Uani 1 1 d . U . . .
C38 C 0.45196(10) 0.2746(2) 0.2356(4) 0.0405(13) Uani 1 1 d . . . . .
C39 C 0.46098(10) 0.3314(2) 0.2396(5) 0.0390(12) Uani 1 1 d . . . . .
C40 C 0.47386(10) 0.35566(19) 0.1239(5) 0.0393(12) Uani 1 1 d . . . . .
H40 H 0.4711 0.3397 0.0390 0.047 Uiso 1 1 calc R U . . .
C41 C 0.49063(10) 0.40337(19) 0.1363(5) 0.0399(12) Uani 1 1 d . . . . .
H41 H 0.4992 0.4187 0.0587 0.048 Uiso 1 1 calc R U . . .
C42 C 0.49509(10) 0.42927(19) 0.2606(5) 0.0382(12) Uani 1 1 d . . . . .
C43 C 0.47929(10) 0.4079(2) 0.3732(5) 0.0421(13) Uani 1 1 d . . . . .
H43 H 0.4800 0.4264 0.4558 0.050 Uiso 1 1 calc R U . . .
C44 C 0.46268(10) 0.3594(2) 0.3624(5) 0.0408(12) Uani 1 1 d . . . . .
H44 H 0.4526 0.3456 0.4383 0.049 Uiso 1 1 calc R U . . .
C45 C 0.51941(10) 0.47125(19) 0.2766(5) 0.0410(13) Uani 1 1 d . . . . .
C46 C 0.53036(11) 0.5020(2) 0.1665(5) 0.0496(14) Uani 1 1 d . . . . .
H46 H 0.5187 0.5044 0.0878 0.060 Uiso 1 1 calc R U . . .
C47 C 0.55812(12) 0.5287(2) 0.1724(5) 0.0510(14) Uani 1 1 d . . . . .
H47 H 0.5648 0.5483 0.0971 0.061 Uiso 1 1 calc R U . . .
C48 C 0.57629(11) 0.52676(19) 0.2890(5) 0.0438(13) Uani 1 1 d . . . . .
C49 C 0.56367(11) 0.5015(2) 0.4047(5) 0.0475(14) Uani 1 1 d . . . . .
H49 H 0.5742 0.5027 0.4867 0.057 Uiso 1 1 calc R U . . .
C50 C 0.53574(11) 0.47487(19) 0.3984(5) 0.0433(13) Uani 1 1 d . . . . .
H50 H 0.5277 0.4591 0.4767 0.052 Uiso 1 1 calc R U . . .
C51 C 0.60910(11) 0.5406(2) 0.2868(5) 0.0449(13) Uani 1 1 d . . . . .
C52 C 0.62525(12) 0.5372(2) 0.1647(6) 0.0530(15) Uani 1 1 d . . . . .
H52 H 0.6146 0.5357 0.0830 0.064 Uiso 1 1 calc R U . . .
C53 C 0.65710(12) 0.5360(2) 0.1631(6) 0.0553(15) Uani 1 1 d . . . . .
H53 H 0.6674 0.5337 0.0809 0.066 Uiso 1 1 calc R U . . .
C54 C 0.67333(12) 0.5384(2) 0.2850(6) 0.0509(14) Uani 1 1 d . . . . .
C55 C 0.65740(12) 0.5475(2) 0.4056(6) 0.0543(14) Uani 1 1 d . . . . .
H55 H 0.6681 0.5527 0.4862 0.065 Uiso 1 1 calc R U . . .
C56 C 0.62556(12) 0.5489(2) 0.4068(5) 0.0528(14) Uani 1 1 d . . . . .
H56 H 0.6153 0.5553 0.4879 0.063 Uiso 1 1 calc R U . . .
C57 C 0.70479(13) 0.5227(2) 0.2866(5) 0.0544(15) Uani 1 1 d . . . . .
C58 C 0.72890(14) 0.5004(2) 0.2873(5) 0.0562(15) Uani 1 1 d . . . . .
C59 C 0.75345(12) 0.4610(2) 0.2857(6) 0.0529(14) Uani 1 1 d . . . . .
C60 C 0.76168(12) 0.4357(3) 0.1645(6) 0.0613(16) Uani 1 1 d . . . . .
H60 H 0.7554 0.4507 0.0823 0.074 Uiso 1 1 calc R U . . .
C61 C 0.77894(12) 0.3890(3) 0.1646(5) 0.0607(16) Uani 1 1 d . . . . .
H61 H 0.7837 0.3723 0.0822 0.073 Uiso 1 1 calc R U . . .
C62 C 0.78953(10) 0.3657(2) 0.2856(5) 0.0450(13) Uani 1 1 d . . . . .
C63 C 0.78409(12) 0.3948(3) 0.4053(5) 0.0582(15) Uani 1 1 d . . . . .
H63 H 0.7926 0.3825 0.4863 0.070 Uiso 1 1 calc R U . . .
C64 C 0.76641(12) 0.4411(3) 0.4057(6) 0.0609(16) Uani 1 1 d . . . . .
H64 H 0.7630 0.4596 0.4869 0.073 Uiso 1 1 calc R U . . .
C65 C 0.80010(10) 0.3083(2) 0.2889(5) 0.0472(14) Uani 1 1 d . . . . .
C66 C 0.80560(14) 0.2785(2) 0.1731(6) 0.080(2) Uani 1 1 d . . . . .
H66 H 0.8094 0.2970 0.0922 0.097 Uiso 1 1 calc R U . . .
C67 C 0.79881(15) 0.2784(2) 0.4078(6) 0.084(2) Uani 1 1 d . . . . .
H67 H 0.7979 0.2969 0.4903 0.101 Uiso 1 1 calc R U . . .
C76 C 0.50120(17) 0.7500(8) 0.2498(6) 0.076(2) Uani 0.5 1 d D U P A -1
H76 H 0.4803 0.7538 0.2406 0.091 Uiso 0.5 1 calc R U P A -1
C77 C 0.5123(3) 0.6977(7) 0.2553(14) 0.074(3) Uani 0.5 1 d D U P A -1
C78 C 0.5446(3) 0.6936(7) 0.261(2) 0.098(4) Uani 0.5 1 d D U P A -1
H78 H 0.5536 0.6591 0.2668 0.118 Uiso 0.5 1 calc R U P A -1
C79 C 0.5633(2) 0.7404(7) 0.2567(12) 0.110(4) Uani 0.5 1 d D U P A -1
H79 H 0.5843 0.7368 0.2527 0.132 Uiso 0.5 1 calc R U P A -1
C78A C 0.5499(3) 0.7925(7) 0.259(2) 0.103(4) Uani 0.5 1 d D U P A -1
H78A H 0.5619 0.8237 0.2622 0.123 Uiso 0.5 1 calc R U P A -1
C77A C 0.5178(3) 0.7972(7) 0.2564(16) 0.085(3) Uani 0.5 1 d D U P A -1
C80 C 0.4943(4) 0.6472(8) 0.257(3) 0.092(6) Uani 0.5 1 d D U P A -1
H80A H 0.5062 0.6177 0.2197 0.138 Uiso 0.5 1 calc R U P A -1
H80B H 0.4763 0.6522 0.2036 0.138 Uiso 0.5 1 calc R U P A -1
H80C H 0.4888 0.6385 0.3489 0.138 Uiso 0.5 1 calc R U P A -1
C80A C 0.5055(4) 0.8518(7) 0.2632(17) 0.064(4) Uani 0.5 1 d D U P A -1
H80D H 0.5215 0.8773 0.2824 0.096 Uiso 0.5 1 calc R U P A -1
H80E H 0.4905 0.8535 0.3339 0.096 Uiso 0.5 1 calc R U P A -1
H80F H 0.4962 0.8609 0.1777 0.096 Uiso 0.5 1 calc R U P A -1
C68 C 0.61762(10) 0.4526(2) -0.2352(4) 0.0399(12) Uani 1 1 d D . . . .
H68 H 0.6175 0.4147 -0.2447 0.048 Uiso 1 1 calc R U . . .
C69 C 0.64544(11) 0.4795(2) -0.2378(5) 0.0449(13) Uani 1 1 d D . . . .
C70 C 0.64521(12) 0.5366(2) -0.2228(5) 0.0559(15) Uani 1 1 d D . . . .
H70 H 0.6635 0.5557 -0.2232 0.067 Uiso 1 1 calc R U . . .
C71 C 0.61786(13) 0.5651(2) -0.2072(5) 0.0604(16) Uani 1 1 d D . . . .
H71 H 0.6179 0.6030 -0.1980 0.072 Uiso 1 1 calc R U . . .
C72 C 0.59049(12) 0.5361(2) -0.2057(5) 0.0504(14) Uani 1 1 d D . . . .
H72 H 0.5723 0.5550 -0.1955 0.060 Uiso 1 1 calc R U . . .
C73 C 0.59001(10) 0.4790(2) -0.2192(4) 0.0397(12) Uani 1 1 d D . . . .
C74 C 0.67516(11) 0.4497(2) -0.2558(6) 0.0661(17) Uani 1 1 d D . . . .
H74A H 0.6716 0.4108 -0.2550 0.099 Uiso 1 1 calc R U . . .
H74B H 0.6887 0.4591 -0.1829 0.099 Uiso 1 1 calc R U . . .
H74C H 0.6842 0.4600 -0.3409 0.099 Uiso 1 1 calc R U . . .
C75 C 0.56099(11) 0.4480(2) -0.2154(5) 0.0557(15) Uani 1 1 d D . . . .
H75A H 0.5628 0.4157 -0.2708 0.084 Uiso 1 1 calc R U . . .
H75B H 0.5448 0.4707 -0.2496 0.084 Uiso 1 1 calc R U . . .
H75C H 0.5566 0.4375 -0.1235 0.084 Uiso 1 1 calc R U . . .
C81 C 0.75198(16) 0.2467(8) 0.7692(6) 0.044(2) Uani 0.5 1 d D U P B -1
H81 H 0.7310 0.2503 0.7624 0.053 Uiso 0.5 1 calc R U P B -1
C82 C 0.7691(3) 0.2946(6) 0.777(2) 0.037(3) Uani 0.5 1 d D U P B -1
C83 C 0.8009(2) 0.2886(5) 0.7855(17) 0.049(4) Uani 0.5 1 d D U P B -1
H83 H 0.8133 0.3194 0.7864 0.059 Uiso 0.5 1 calc R U P B -1
C84 C 0.8136(2) 0.2364(4) 0.7924(9) 0.047(4) Uani 0.5 1 d D U P B -1
H84 H 0.8346 0.2327 0.8011 0.057 Uiso 0.5 1 calc R U P B -1
C85 C 0.7954(3) 0.1895(5) 0.7864(15) 0.051(4) Uani 0.5 1 d D U P B -1
H85 H 0.8043 0.1550 0.7929 0.061 Uiso 0.5 1 calc R U P B -1
C86 C 0.7639(3) 0.1942(7) 0.770(3) 0.049(4) Uani 0.5 1 d D U P B -1
C87 C 0.7546(4) 0.3497(8) 0.769(3) 0.056(5) Uani 0.5 1 d D U P B -1
H87A H 0.7415 0.3512 0.6912 0.084 Uiso 0.5 1 calc R U P B -1
H87B H 0.7701 0.3773 0.7611 0.084 Uiso 0.5 1 calc R U P B -1
H87C H 0.7429 0.3562 0.8499 0.084 Uiso 0.5 1 calc R U P B -1
C88 C 0.7441(4) 0.1454(8) 0.764(3) 0.050(4) Uani 0.5 1 d D U P B -1
H88A H 0.7234 0.1560 0.7811 0.075 Uiso 0.5 1 calc R U P B -1
H88B H 0.7504 0.1193 0.8313 0.075 Uiso 0.5 1 calc R U P B -1
H88C H 0.7455 0.1292 0.6754 0.075 Uiso 0.5 1 calc R U P B -1
 
loop_
 _atom_site_aniso_label
 _atom_site_aniso_U_11
 _atom_site_aniso_U_22
 _atom_site_aniso_U_33
 _atom_site_aniso_U_23
 _atom_site_aniso_U_13
 _atom_site_aniso_U_12
C1 0.029(3) 0.087(4) 0.055(3) 0.001(3) -0.008(2) -0.017(3)
C2 0.027(4) 0.095(5) 0.054(4) 0.000 -0.011(3) 0.000
C3 0.040(4) 0.089(5) 0.044(4) 0.000 -0.018(3) 0.000
C4 0.042(3) 0.079(4) 0.040(3) -0.006(3) -0.012(2) -0.012(3)
C5 0.052(3) 0.083(4) 0.024(2) -0.008(2) -0.008(2) -0.005(2)
C6 0.052(3) 0.067(3) 0.030(3) -0.018(2) -0.001(2) -0.001(2)
C7 0.047(3) 0.074(3) 0.025(3) -0.010(2) 0.007(2) 0.001(2)
C8 0.041(3) 0.072(3) 0.041(3) -0.011(2) 0.011(2) 0.007(2)
C9 0.032(4) 0.073(5) 0.041(4) 0.000 0.018(3) 0.000
C10 0.025(4) 0.071(5) 0.050(4) 0.000 0.007(3) 0.000
C11 0.033(3) 0.064(3) 0.052(3) 0.000(2) 0.005(2) 0.014(2)
C12 0.028(3) 0.065(3) 0.052(3) 0.000(2) -0.004(2) 0.010(2)
C13 0.034(3) 0.070(3) 0.047(3) 0.009(2) -0.009(2) 0.011(2)
C14 0.035(3) 0.071(3) 0.034(3) 0.007(2) -0.011(2) 0.005(2)
C15 0.041(3) 0.081(4) 0.027(3) 0.016(2) -0.004(2) -0.001(2)
C16 0.043(3) 0.086(3) 0.022(2) 0.012(2) 0.000(2) -0.003(2)
C17 0.043(3) 0.088(4) 0.029(3) 0.017(2) 0.005(2) -0.007(2)
C18 0.041(3) 0.101(4) 0.030(3) 0.007(2) 0.011(2) -0.007(2)
C19 0.035(3) 0.097(4) 0.043(3) 0.009(3) 0.007(2) -0.013(3)
C20 0.025(3) 0.101(4) 0.053(3) 0.005(3) 0.004(2) -0.013(2)
C21 0.046(3) 0.076(4) 0.056(3) -0.001(3) -0.005(2) -0.024(3)
C22 0.047(3) 0.070(3) 0.047(3) -0.011(2) -0.010(2) -0.020(3)
C23 0.060(3) 0.055(3) 0.059(3) -0.015(3) -0.005(2) -0.015(3)
C24 0.061(3) 0.053(3) 0.047(3) -0.021(2) -0.002(2) -0.004(2)
C25 0.057(3) 0.046(3) 0.056(3) -0.016(2) 0.002(2) 0.010(2)
C26 0.049(3) 0.056(3) 0.046(3) -0.012(2) 0.009(2) 0.011(2)
C27 0.047(3) 0.049(3) 0.056(3) -0.007(2) 0.003(2) 0.020(2)
C28 0.050(3) 0.049(3) 0.058(3) 0.004(2) -0.002(2) 0.013(2)
C29 0.041(3) 0.056(3) 0.053(3) 0.014(2) -0.007(2) 0.011(2)
C30 0.048(3) 0.059(3) 0.048(3) 0.022(2) -0.009(2) 0.002(2)
C31 0.054(3) 0.052(3) 0.052(3) 0.017(2) 0.000(2) -0.005(2)
C32 0.048(3) 0.073(4) 0.049(3) 0.018(3) 0.003(2) -0.015(2)
C33 0.043(3) 0.079(4) 0.054(3) 0.014(3) 0.007(2) -0.022(3)
C34 0.054(3) 0.065(4) 0.059(3) 0.005(3) -0.003(2) -0.024(3)
C35 0.063(3) 0.049(3) 0.063(3) -0.002(3) -0.002(2) -0.019(3)
C36 0.064(3) 0.039(3) 0.063(3) 0.006(2) -0.002(2) -0.003(2)
C37 0.060(3) 0.034(3) 0.063(3) -0.005(2) 0.001(2) 0.008(2)
C38 0.030(3) 0.047(4) 0.044(3) -0.005(2) -0.003(2) 0.001(2)
C39 0.029(3) 0.047(4) 0.040(3) -0.003(3) -0.003(2) 0.007(2)
C40 0.035(3) 0.045(3) 0.038(3) -0.003(3) -0.003(2) 0.009(3)
C41 0.039(3) 0.040(3) 0.041(3) 0.004(3) -0.005(2) 0.007(3)
C42 0.033(3) 0.039(3) 0.042(3) -0.004(3) -0.004(2) 0.010(2)
C43 0.038(3) 0.047(3) 0.041(3) -0.010(3) -0.002(2) 0.011(3)
C44 0.034(3) 0.043(3) 0.045(3) -0.001(3) 0.004(2) 0.004(3)
C45 0.039(3) 0.040(3) 0.044(3) -0.007(3) -0.004(3) 0.014(3)
C46 0.050(4) 0.045(3) 0.054(4) 0.010(3) -0.018(3) -0.002(3)
C47 0.059(4) 0.040(3) 0.054(3) 0.012(3) -0.009(3) 0.002(3)
C48 0.049(3) 0.033(3) 0.049(3) -0.002(3) -0.006(3) 0.004(2)
C49 0.045(3) 0.057(3) 0.041(3) -0.017(3) -0.006(3) 0.007(3)
C50 0.041(3) 0.048(3) 0.040(3) -0.011(2) 0.003(3) 0.007(3)
C51 0.048(3) 0.040(3) 0.047(3) 0.003(2) -0.006(3) 0.000(3)
C52 0.060(4) 0.051(4) 0.048(4) 0.007(3) -0.010(3) -0.008(3)
C53 0.059(4) 0.052(4) 0.055(4) 0.006(3) 0.003(3) -0.016(3)
C54 0.048(4) 0.047(3) 0.058(4) 0.009(3) -0.004(3) -0.015(3)
C55 0.052(4) 0.053(4) 0.058(4) -0.003(3) -0.011(3) -0.013(3)
C56 0.056(4) 0.049(3) 0.053(4) -0.007(3) -0.004(3) -0.005(3)
C57 0.046(4) 0.055(4) 0.062(4) 0.004(3) -0.005(3) -0.017(3)
C58 0.054(4) 0.058(4) 0.056(4) 0.002(3) 0.000(3) -0.020(4)
C59 0.045(3) 0.057(4) 0.057(4) -0.003(3) 0.006(3) -0.017(3)
C60 0.058(4) 0.077(4) 0.049(4) 0.015(3) 0.008(3) 0.002(3)
C61 0.056(4) 0.089(5) 0.037(3) 0.001(3) 0.007(3) -0.010(4)
C62 0.031(3) 0.068(4) 0.037(3) -0.005(3) 0.001(2) -0.014(3)
C63 0.048(3) 0.084(5) 0.043(4) -0.004(3) -0.004(3) -0.003(3)
C64 0.053(4) 0.082(5) 0.048(4) -0.014(3) -0.004(3) -0.005(3)
C65 0.023(3) 0.079(4) 0.040(3) -0.001(3) -0.003(2) -0.008(3)
C66 0.121(5) 0.083(4) 0.037(3) 0.003(3) 0.033(3) -0.003(4)
C67 0.131(6) 0.078(4) 0.042(4) -0.008(3) -0.035(4) 0.002(4)
C76 0.037(4) 0.111(5) 0.080(5) -0.028(7) 0.016(4) 0.008(6)
C77 0.064(6) 0.106(6) 0.053(6) -0.036(7) 0.022(5) 0.007(6)
C78 0.075(6) 0.110(8) 0.110(7) -0.023(7) 0.011(6) 0.011(6)
C79 0.077(6) 0.107(9) 0.146(7) -0.018(8) 0.003(5) 0.013(6)
C78A 0.065(6) 0.110(8) 0.133(8) -0.022(7) -0.002(6) 0.018(6)
C77A 0.059(6) 0.110(6) 0.086(7) -0.025(7) 0.004(5) 0.007(5)
C80 0.075(10) 0.107(8) 0.093(13) -0.023(8) 0.026(9) 0.014(7)
C80A 0.069(10) 0.107(7) 0.015(7) -0.024(6) 0.008(7) 0.015(7)
C68 0.041(3) 0.045(3) 0.033(3) 0.001(2) -0.001(2) 0.000(3)
C69 0.042(3) 0.060(4) 0.033(3) 0.002(3) -0.001(2) -0.001(3)
C70 0.045(4) 0.069(5) 0.053(3) -0.003(3) -0.004(3) -0.017(3)
C71 0.070(4) 0.057(4) 0.054(4) -0.001(3) 0.001(3) -0.009(4)
C72 0.049(4) 0.056(4) 0.046(3) 0.002(3) -0.003(3) 0.010(3)
C73 0.041(3) 0.045(4) 0.034(3) 0.002(2) -0.001(2) 0.001(3)
C74 0.046(3) 0.084(4) 0.069(4) 0.003(3) 0.002(3) -0.008(3)
C75 0.049(3) 0.062(4) 0.056(3) 0.001(3) -0.003(3) 0.006(3)
C81 0.040(4) 0.058(5) 0.034(4) -0.006(6) 0.000(3) -0.011(6)
C82 0.036(6) 0.057(7) 0.017(8) -0.002(6) -0.002(5) -0.012(5)
C83 0.037(6) 0.066(10) 0.045(9) -0.003(6) -0.006(5) -0.010(5)
C84 0.039(5) 0.069(11) 0.034(5) -0.001(5) -0.006(4) -0.004(4)
C85 0.051(6) 0.071(10) 0.029(7) -0.001(5) -0.002(5) -0.003(5)
C86 0.053(6) 0.058(7) 0.036(10) -0.009(6) 0.001(6) -0.005(5)
C87 0.051(10) 0.058(7) 0.059(11) 0.000(6) 0.000(9) -0.018(6)
C88 0.051(9) 0.054(6) 0.044(9) -0.004(6) -0.006(9) 0.003(6)
 
_geom_special_details
;
 All esds (except the esd in the dihedral angle between two l.s. planes)
 are estimated using the full covariance matrix.  The cell esds are taken
 into account individually in the estimation of esds in distances, angles
 and torsion angles; correlations between esds in cell parameters are only
 used when they are defined by crystal symmetry.  An approximate (isotropic)
 treatment of cell esds is used for estimating esds involving l.s. planes.
;
 
loop_
 _geom_bond_atom_site_label_1
 _geom_bond_atom_site_label_2
 _geom_bond_distance
 _geom_bond_site_symmetry_2
 _geom_bond_publ_flag
C1 C21 1.395(8) . ?
C1 C2 1.442(7) . ?
C1 C20 1.444(7) . ?
C2 C3 1.395(10) . ?
C2 C1 1.442(7) 7_565 ?
C3 C4 1.443(7) . ?
C3 C4 1.443(7) 7_565 ?
C4 C22 1.394(7) . ?
C4 C5 1.441(7) . ?
C5 C6 1.435(7) . ?
C5 C5 1.435(11) 7_565 ?
C6 C7 1.415(7) . ?
C6 C24 1.476(8) . ?
C7 C8 1.434(7) . ?
C7 C7 1.438(10) 7_565 ?
C8 C26 1.381(7) . ?
C8 C9 1.460(6) . ?
C9 C10 1.397(10) . ?
C9 C8 1.460(6) 7_565 ?
C10 C11 1.439(6) . ?
C10 C11 1.439(6) 7_565 ?
C11 C27 1.409(7) . ?
C11 C12 1.443(7) . ?
C12 C13 1.394(7) . ?
C12 C12 1.452(10) 7_565 ?
C13 C29 1.434(7) . ?
C13 C14 1.458(7) . ?
C14 C14 1.358(10) 7_565 ?
C14 C15 1.450(7) . ?
C15 C16 1.400(7) . ?
C15 C30 1.436(7) . ?
C16 C17 1.421(7) . ?
C16 C16 1.470(11) 7_565 ?
C17 C32 1.442(8) . ?
C17 C18 1.452(7) . ?
C18 C18 1.389(11) 7_565 ?
C18 C19 1.446(7) . ?
C19 C20 1.397(7) . ?
C19 C33 1.451(8) . ?
C20 C20 1.464(11) 7_565 ?
C21 C34 1.436(8) . ?
C21 C22 1.454(7) . ?
C22 C23 1.442(7) . ?
C23 C35 1.434(7) . ?
C23 C24 1.439(7) . ?
C24 C25 1.414(7) . ?
C25 C37 1.429(7) . ?
C25 C26 1.441(7) . ?
C26 C27 1.451(7) . ?
C27 C28 1.440(7) . ?
C28 C29 1.384(7) . ?
C28 C37 1.436(7) . ?
C29 C30 1.448(7) . ?
C30 C31 1.410(7) . ?
C31 C32 1.429(7) . ?
C31 C36 1.466(7) . ?
C32 C33 1.446(7) . ?
C33 C34 1.375(7) . ?
C34 C35 1.457(8) . ?
C35 C36 1.426(7) . ?
C36 C37 1.413(7) . ?
C38 C38 1.200(10) 7_565 ?
C38 C39 1.442(6) . ?
C39 C44 1.390(6) . ?
C39 C40 1.401(6) . ?
C40 C41 1.383(6) . ?
C40 H40 0.9300 . ?
C41 C42 1.390(6) . ?
C41 H41 0.9300 . ?
C42 C43 1.407(6) . ?
C42 C45 1.489(7) . ?
C43 C44 1.394(6) . ?
C43 H43 0.9300 . ?
C44 H44 0.9300 . ?
C45 C50 1.399(6) . ?
C45 C46 1.402(7) . ?
C46 C47 1.385(7) . ?
C46 H46 0.9300 . ?
C47 C48 1.399(7) . ?
C47 H47 0.9300 . ?
C48 C49 1.408(7) . ?
C48 C51 1.482(7) . ?
C49 C50 1.390(6) . ?
C49 H49 0.9300 . ?
C50 H50 0.9300 . ?
C51 C52 1.398(7) . ?
C51 C56 1.399(7) . ?
C52 C53 1.401(7) . ?
C52 H52 0.9300 . ?
C53 C54 1.396(7) . ?
C53 H53 0.9300 . ?
C54 C55 1.395(7) . ?
C54 C57 1.435(8) . ?
C55 C56 1.400(7) . ?
C55 H55 0.9300 . ?
C56 H56 0.9300 . ?
C57 C58 1.191(8) . ?
C58 C59 1.446(8) . ?
C59 C60 1.391(7) . ?
C59 C64 1.397(7) . ?
C60 C61 1.369(7) . ?
C60 H60 0.9300 . ?
C61 C62 1.399(7) . ?
C61 H61 0.9300 . ?
C62 C63 1.396(7) . ?
C62 C65 1.475(7) . ?
C63 C64 1.372(7) . ?
C63 H63 0.9300 . ?
C64 H64 0.9300 . ?
C65 C66 1.373(7) . ?
C65 C67 1.379(7) . ?
C66 C66 1.389(12) 7_565 ?
C66 H66 0.9300 . ?
C67 C67 1.385(12) 7_565 ?
C67 H67 0.9300 . ?
C76 C77A 1.364(10) . ?
C76 C77 1.367(10) . ?
C76 H76 0.9300 . ?
C77 C78 1.424(10) . ?
C77 C80 1.465(10) . ?
C78 C79 1.406(10) . ?
C78 H78 0.9300 . ?
C79 C78A 1.401(10) . ?
C79 H79 0.9300 . ?
C78A C77A 1.415(10) . ?
C78A H78A 0.9300 . ?
C77A C80A 1.438(10) . ?
C80 H80A 0.9600 . ?
C80 H80B 0.9600 . ?
C80 H80C 0.9600 . ?
C80A H80D 0.9600 . ?
C80A H80E 0.9600 . ?
C80A H80F 0.9600 . ?
C68 C73 1.383(6) . ?
C68 C69 1.388(6) . ?
C68 H68 0.9300 . ?
C69 C70 1.399(7) . ?
C69 C74 1.506(7) . ?
C70 C71 1.397(7) . ?
C70 H70 0.9300 . ?
C71 C72 1.396(7) . ?
C71 H71 0.9300 . ?
C72 C73 1.398(6) . ?
C72 H72 0.9300 . ?
C73 C75 1.484(6) . ?
C74 H74A 0.9600 . ?
C74 H74B 0.9600 . ?
C74 H74C 0.9600 . ?
C75 H75A 0.9600 . ?
C75 H75B 0.9600 . ?
C75 H75C 0.9600 . ?
C81 C86 1.383(10) . ?
C81 C82 1.392(9) . ?
C81 H81 0.9300 . ?
C82 C83 1.407(10) . ?
C82 C87 1.490(10) . ?
C83 C84 1.392(10) . ?
C83 H83 0.9300 . ?
C84 C85 1.398(10) . ?
C84 H84 0.9300 . ?
C85 C86 1.400(10) . ?
C85 H85 0.9300 . ?
C86 C88 1.475(10) . ?
C87 H87A 0.9600 . ?
C87 H87B 0.9600 . ?
C87 H87C 0.9600 . ?
C88 H88A 0.9600 . ?
C88 H88B 0.9600 . ?
C88 H88C 0.9600 . ?
 
loop_
 _geom_angle_atom_site_label_1
 _geom_angle_atom_site_label_2
 _geom_angle_atom_site_label_3
 _geom_angle
 _geom_angle_site_symmetry_1
 _geom_angle_site_symmetry_3
 _geom_angle_publ_flag
C21 C1 C2 121.0(5) . . ?
C21 C1 C20 119.4(5) . . ?
C2 C1 C20 107.6(5) . . ?
C3 C2 C1 119.3(4) . . ?
C3 C2 C1 119.3(4) . 7_565 ?
C1 C2 C1 109.1(7) . 7_565 ?
C2 C3 C4 120.5(4) . . ?
C2 C3 C4 120.5(4) . 7_565 ?
C4 C3 C4 106.8(6) . 7_565 ?
C22 C4 C5 119.0(5) . . ?
C22 C4 C3 120.0(5) . . ?
C5 C4 C3 108.7(5) . . ?
C6 C5 C5 120.8(3) . 7_565 ?
C6 C5 C4 122.4(5) . . ?
C5 C5 C4 107.8(3) 7_565 . ?
C7 C6 C5 116.8(5) . . ?
C7 C6 C24 118.6(5) . . ?
C5 C6 C24 118.2(4) . . ?
C6 C7 C8 121.6(5) . . ?
C6 C7 C7 121.2(3) . 7_565 ?
C8 C7 C7 108.3(3) . 7_565 ?
C26 C8 C7 119.5(5) . . ?
C26 C8 C9 119.9(5) . . ?
C7 C8 C9 108.6(5) . . ?
C10 C9 C8 120.3(4) . 7_565 ?
C10 C9 C8 120.3(4) . . ?
C8 C9 C8 106.3(6) 7_565 . ?
C9 C10 C11 119.9(4) . . ?
C9 C10 C11 119.9(4) . 7_565 ?
C11 C10 C11 107.6(6) . 7_565 ?
C27 C11 C10 119.8(5) . . ?
C27 C11 C12 119.0(5) . . ?
C10 C11 C12 108.6(5) . . ?
C13 C12 C11 120.1(5) . . ?
C13 C12 C12 120.0(3) . 7_565 ?
C11 C12 C12 107.6(3) . 7_565 ?
C12 C13 C29 120.4(5) . . ?
C12 C13 C14 119.3(5) . . ?
C29 C13 C14 107.5(4) . . ?
C14 C14 C15 120.1(3) 7_565 . ?
C14 C14 C13 120.7(3) 7_565 . ?
C15 C14 C13 107.2(4) . . ?
C16 C15 C30 120.7(5) . . ?
C16 C15 C14 121.1(5) . . ?
C30 C15 C14 109.0(4) . . ?
C15 C16 C17 116.8(5) . . ?
C15 C16 C16 118.7(3) . 7_565 ?
C17 C16 C16 118.7(3) . 7_565 ?
C16 C17 C32 121.1(5) . . ?
C16 C17 C18 121.3(5) . . ?
C32 C17 C18 108.0(4) . . ?
C18 C18 C19 120.2(3) 7_565 . ?
C18 C18 C17 119.9(3) 7_565 . ?
C19 C18 C17 108.4(5) . . ?
C20 C19 C18 120.3(6) . . ?
C20 C19 C33 119.6(5) . . ?
C18 C19 C33 107.1(4) . . ?
C19 C20 C1 120.1(5) . . ?
C19 C20 C20 119.6(3) . 7_565 ?
C1 C20 C20 107.8(3) . 7_565 ?
C1 C21 C34 120.3(5) . . ?
C1 C21 C22 119.2(5) . . ?
C34 C21 C22 107.1(5) . . ?
C4 C22 C23 120.5(5) . . ?
C4 C22 C21 120.0(5) . . ?
C23 C22 C21 108.0(5) . . ?
C35 C23 C24 119.9(5) . . ?
C35 C23 C22 108.9(5) . . ?
C24 C23 C22 121.7(5) . . ?
C25 C24 C23 117.2(5) . . ?
C25 C24 C6 118.3(5) . . ?
C23 C24 C6 117.8(5) . . ?
C24 C25 C37 121.2(5) . . ?
C24 C25 C26 121.0(5) . . ?
C37 C25 C26 108.1(5) . . ?
C8 C26 C25 120.8(5) . . ?
C8 C26 C27 120.1(5) . . ?
C25 C26 C27 108.0(5) . . ?
C11 C27 C28 120.5(5) . . ?
C11 C27 C26 120.1(5) . . ?
C28 C27 C26 107.2(5) . . ?
C29 C28 C37 120.4(5) . . ?
C29 C28 C27 119.8(5) . . ?
C37 C28 C27 108.3(5) . . ?
C28 C29 C13 120.3(5) . . ?
C28 C29 C30 119.0(5) . . ?
C13 C29 C30 109.2(5) . . ?
C31 C30 C15 122.1(5) . . ?
C31 C30 C29 121.5(5) . . ?
C15 C30 C29 107.1(5) . . ?
C30 C31 C32 116.1(5) . . ?
C30 C31 C36 119.1(5) . . ?
C32 C31 C36 117.6(5) . . ?
C31 C32 C17 120.4(5) . . ?
C31 C32 C33 122.9(5) . . ?
C17 C32 C33 107.7(5) . . ?
C34 C33 C32 119.4(5) . . ?
C34 C33 C19 120.1(5) . . ?
C32 C33 C19 108.8(5) . . ?
C33 C34 C21 120.5(6) . . ?
C33 C34 C35 119.4(5) . . ?
C21 C34 C35 109.0(5) . . ?
C36 C35 C23 121.0(5) . . ?
C36 C35 C34 122.4(5) . . ?
C23 C35 C34 106.9(5) . . ?
C37 C36 C35 117.4(5) . . ?
C37 C36 C31 117.8(5) . . ?
C35 C36 C31 118.0(5) . . ?
C36 C37 C25 120.9(5) . . ?
C36 C37 C28 121.9(5) . . ?
C25 C37 C28 108.3(5) . . ?
C38 C38 C39 163.9(2) 7_565 . ?
C44 C39 C40 118.5(5) . . ?
C44 C39 C38 120.7(4) . . ?
C40 C39 C38 119.6(4) . . ?
C41 C40 C39 119.9(4) . . ?
C41 C40 H40 120.0 . . ?
C39 C40 H40 120.0 . . ?
C40 C41 C42 122.3(4) . . ?
C40 C41 H41 118.8 . . ?
C42 C41 H41 118.8 . . ?
C41 C42 C43 117.0(4) . . ?
C41 C42 C45 120.5(4) . . ?
C43 C42 C45 121.7(4) . . ?
C44 C43 C42 120.9(4) . . ?
C44 C43 H43 119.6 . . ?
C42 C43 H43 119.6 . . ?
C39 C44 C43 120.7(4) . . ?
C39 C44 H44 119.7 . . ?
C43 C44 H44 119.7 . . ?
C50 C45 C46 116.9(5) . . ?
C50 C45 C42 120.2(4) . . ?
C46 C45 C42 122.1(4) . . ?
C47 C46 C45 121.4(5) . . ?
C47 C46 H46 119.3 . . ?
C45 C46 H46 119.3 . . ?
C46 C47 C48 121.5(5) . . ?
C46 C47 H47 119.3 . . ?
C48 C47 H47 119.3 . . ?
C47 C48 C49 116.9(5) . . ?
C47 C48 C51 122.4(5) . . ?
C49 C48 C51 119.7(4) . . ?
C50 C49 C48 121.1(4) . . ?
C50 C49 H49 119.5 . . ?
C48 C49 H49 119.5 . . ?
C49 C50 C45 121.4(5) . . ?
C49 C50 H50 119.3 . . ?
C45 C50 H50 119.3 . . ?
C52 C51 C56 118.1(5) . . ?
C52 C51 C48 119.6(5) . . ?
C56 C51 C48 121.6(5) . . ?
C51 C52 C53 121.2(5) . . ?
C51 C52 H52 119.4 . . ?
C53 C52 H52 119.4 . . ?
C54 C53 C52 120.0(5) . . ?
C54 C53 H53 120.0 . . ?
C52 C53 H53 120.0 . . ?
C55 C54 C53 118.7(5) . . ?
C55 C54 C57 121.1(5) . . ?
C53 C54 C57 119.4(5) . . ?
C54 C55 C56 120.8(5) . . ?
C54 C55 H55 119.6 . . ?
C56 C55 H55 119.6 . . ?
C51 C56 C55 120.4(5) . . ?
C51 C56 H56 119.8 . . ?
C55 C56 H56 119.8 . . ?
C58 C57 C54 168.3(6) . . ?
C57 C58 C59 165.4(6) . . ?
C60 C59 C64 117.7(5) . . ?
C60 C59 C58 119.9(5) . . ?
C64 C59 C58 121.7(5) . . ?
C61 C60 C59 120.9(5) . . ?
C61 C60 H60 119.6 . . ?
C59 C60 H60 119.6 . . ?
C60 C61 C62 121.5(5) . . ?
C60 C61 H61 119.2 . . ?
C62 C61 H61 119.2 . . ?
C63 C62 C61 117.0(5) . . ?
C63 C62 C65 121.2(5) . . ?
C61 C62 C65 120.6(5) . . ?
C64 C63 C62 121.2(5) . . ?
C64 C63 H63 119.4 . . ?
C62 C63 H63 119.4 . . ?
C63 C64 C59 121.0(5) . . ?
C63 C64 H64 119.5 . . ?
C59 C64 H64 119.5 . . ?
C66 C65 C67 115.6(5) . . ?
C66 C65 C62 122.6(5) . . ?
C67 C65 C62 120.5(5) . . ?
C65 C66 C66 122.0(3) . 7_565 ?
C65 C66 H66 119.0 . . ?
C66 C66 H66 119.0 7_565 . ?
C65 C67 C67 121.9(3) . 7_565 ?
C65 C67 H67 119.1 . . ?
C67 C67 H67 119.1 7_565 . ?
C77A C76 C77 126.5(7) . . ?
C77A C76 H76 116.8 . . ?
C77 C76 H76 116.8 . . ?
C76 C77 C78 115.1(9) . . ?
C76 C77 C80 126.3(10) . . ?
C78 C77 C80 118.5(10) . . ?
C79 C78 C77 121.5(10) . . ?
C79 C78 H78 119.2 . . ?
C77 C78 H78 119.2 . . ?
C78A C79 C78 119.3(9) . . ?
C78A C79 H79 120.4 . . ?
C78 C79 H79 120.4 . . ?
C79 C78A C77A 119.6(10) . . ?
C79 C78A H78A 120.2 . . ?
C77A C78A H78A 120.2 . . ?
C76 C77A C78A 117.7(9) . . ?
C76 C77A C80A 125.6(11) . . ?
C78A C77A C80A 116.7(10) . . ?
C77 C80 H80A 109.5 . . ?
C77 C80 H80B 109.5 . . ?
H80A C80 H80B 109.5 . . ?
C77 C80 H80C 109.5 . . ?
H80A C80 H80C 109.5 . . ?
H80B C80 H80C 109.5 . . ?
C77A C80A H80D 109.5 . . ?
C77A C80A H80E 109.5 . . ?
H80D C80A H80E 109.5 . . ?
C77A C80A H80F 109.5 . . ?
H80D C80A H80F 109.5 . . ?
H80E C80A H80F 109.5 . . ?
C73 C68 C69 123.7(4) . . ?
C73 C68 H68 118.1 . . ?
C69 C68 H68 118.1 . . ?
C68 C69 C70 117.5(5) . . ?
C68 C69 C74 122.5(5) . . ?
C70 C69 C74 120.0(5) . . ?
C71 C70 C69 120.8(5) . . ?
C71 C70 H70 119.6 . . ?
C69 C70 H70 119.6 . . ?
C72 C71 C70 119.4(5) . . ?
C72 C71 H71 120.3 . . ?
C70 C71 H71 120.3 . . ?
C71 C72 C73 121.1(5) . . ?
C71 C72 H72 119.5 . . ?
C73 C72 H72 119.5 . . ?
C68 C73 C72 117.4(4) . . ?
C68 C73 C75 121.4(4) . . ?
C72 C73 C75 121.2(4) . . ?
C69 C74 H74A 109.5 . . ?
C69 C74 H74B 109.5 . . ?
H74A C74 H74B 109.5 . . ?
C69 C74 H74C 109.5 . . ?
H74A C74 H74C 109.5 . . ?
H74B C74 H74C 109.5 . . ?
C73 C75 H75A 109.5 . . ?
C73 C75 H75B 109.5 . . ?
H75A C75 H75B 109.5 . . ?
C73 C75 H75C 109.5 . . ?
H75A C75 H75C 109.5 . . ?
H75B C75 H75C 109.5 . . ?
C86 C81 C82 124.9(7) . . ?
C86 C81 H81 117.5 . . ?
C82 C81 H81 117.5 . . ?
C81 C82 C83 116.9(8) . . ?
C81 C82 C87 121.5(9) . . ?
C83 C82 C87 121.4(9) . . ?
C84 C83 C82 119.8(9) . . ?
C84 C83 H83 120.1 . . ?
C82 C83 H83 120.1 . . ?
C83 C84 C85 121.1(8) . . ?
C83 C84 H84 119.4 . . ?
C85 C84 H84 119.4 . . ?
C84 C85 C86 120.3(10) . . ?
C84 C85 H85 119.9 . . ?
C86 C85 H85 119.9 . . ?
C81 C86 C85 116.8(9) . . ?
C81 C86 C88 121.6(10) . . ?
C85 C86 C88 121.5(10) . . ?
C82 C87 H87A 109.5 . . ?
C82 C87 H87B 109.5 . . ?
H87A C87 H87B 109.5 . . ?
C82 C87 H87C 109.5 . . ?
H87A C87 H87C 109.5 . . ?
H87B C87 H87C 109.5 . . ?
C86 C88 H88A 109.5 . . ?
C86 C88 H88B 109.5 . . ?
H88A C88 H88B 109.5 . . ?
C86 C88 H88C 109.5 . . ?
H88A C88 H88C 109.5 . . ?
H88B C88 H88C 109.5 . . ?
 
loop_
 _geom_torsion_atom_site_label_1
 _geom_torsion_atom_site_label_2
 _geom_torsion_atom_site_label_3
 _geom_torsion_atom_site_label_4
 _geom_torsion
 _geom_torsion_site_symmetry_1
 _geom_torsion_site_symmetry_2
 _geom_torsion_site_symmetry_3
 _geom_torsion_site_symmetry_4
 _geom_torsion_publ_flag
C21 C1 C2 C3 0.1(8) . . . . ?
C20 C1 C2 C3 -142.3(5) . . . . ?
C21 C1 C2 C1 141.9(5) . . . 7_565 ?
C20 C1 C2 C1 -0.5(7) . . . 7_565 ?
C1 C2 C3 C4 0.2(9) . . . . ?
C1 C2 C3 C4 -137.8(5) 7_565 . . . ?
C1 C2 C3 C4 137.8(5) . . . 7_565 ?
C1 C2 C3 C4 -0.2(9) 7_565 . . 7_565 ?
C2 C3 C4 C22 0.0(8) . . . . ?
C4 C3 C4 C22 -142.6(4) 7_565 . . . ?
C2 C3 C4 C5 142.0(5) . . . . ?
C4 C3 C4 C5 -0.6(7) 7_565 . . . ?
C22 C4 C5 C6 -4.5(7) . . . . ?
C3 C4 C5 C6 -146.9(5) . . . . ?
C22 C4 C5 C5 142.7(4) . . . 7_565 ?
C3 C4 C5 C5 0.4(5) . . . 7_565 ?
C5 C5 C6 C7 12.5(5) 7_565 . . . ?
C4 C5 C6 C7 155.7(4) . . . . ?
C5 C5 C6 C24 -139.0(3) 7_565 . . . ?
C4 C5 C6 C24 4.2(7) . . . . ?
C5 C6 C7 C8 -156.0(4) . . . . ?
C24 C6 C7 C8 -4.6(7) . . . . ?
C5 C6 C7 C7 -12.6(5) . . . 7_565 ?
C24 C6 C7 C7 138.8(3) . . . 7_565 ?
C6 C7 C8 C26 5.4(7) . . . . ?
C7 C7 C8 C26 -142.1(4) 7_565 . . . ?
C6 C7 C8 C9 147.9(5) . . . . ?
C7 C7 C8 C9 0.4(4) 7_565 . . . ?
C26 C8 C9 C10 0.5(8) . . . . ?
C7 C8 C9 C10 -141.8(5) . . . . ?
C26 C8 C9 C8 141.7(4) . . . 7_565 ?
C7 C8 C9 C8 -0.6(7) . . . 7_565 ?
C8 C9 C10 C11 -136.5(5) 7_565 . . . ?
C8 C9 C10 C11 -0.6(8) . . . . ?
C8 C9 C10 C11 0.6(8) 7_565 . . 7_565 ?
C8 C9 C10 C11 136.5(5) . . . 7_565 ?
C9 C10 C11 C27 0.3(8) . . . . ?
C11 C10 C11 C27 -141.4(4) 7_565 . . . ?
C9 C10 C11 C12 141.8(5) . . . . ?
C11 C10 C11 C12 0.1(7) 7_565 . . . ?
C27 C11 C12 C13 -0.4(7) . . . . ?
C10 C11 C12 C13 -142.2(5) . . . . ?
C27 C11 C12 C12 141.8(4) . . . 7_565 ?
C10 C11 C12 C12 -0.1(4) . . . 7_565 ?
C11 C12 C13 C29 0.6(7) . . . . ?
C12 C12 C13 C29 -136.9(4) 7_565 . . . ?
C11 C12 C13 C14 137.4(5) . . . . ?
C12 C12 C13 C14 -0.1(5) 7_565 . . . ?
C12 C13 C14 C14 0.1(5) . . . 7_565 ?
C29 C13 C14 C14 141.9(3) . . . 7_565 ?
C12 C13 C14 C15 -142.6(4) . . . . ?
C29 C13 C14 C15 -0.8(5) . . . . ?
C14 C14 C15 C16 4.2(5) 7_565 . . . ?
C13 C14 C15 C16 147.0(4) . . . . ?
C14 C14 C15 C30 -142.7(3) 7_565 . . . ?
C13 C14 C15 C30 0.2(5) . . . . ?
C30 C15 C16 C17 -14.0(7) . . . . ?
C14 C15 C16 C17 -157.0(4) . . . . ?
C30 C15 C16 C16 138.9(4) . . . 7_565 ?
C14 C15 C16 C16 -4.1(5) . . . 7_565 ?
C15 C16 C17 C32 14.5(7) . . . . ?
C16 C16 C17 C32 -138.4(4) 7_565 . . . ?
C15 C16 C17 C18 156.6(4) . . . . ?
C16 C16 C17 C18 3.7(5) 7_565 . . . ?
C16 C17 C18 C18 -3.7(5) . . . 7_565 ?
C32 C17 C18 C18 142.7(3) . . . 7_565 ?
C16 C17 C18 C19 -147.1(4) . . . . ?
C32 C17 C18 C19 -0.6(5) . . . . ?
C18 C18 C19 C20 -1.1(6) 7_565 . . . ?
C17 C18 C19 C20 142.1(5) . . . . ?
C18 C18 C19 C33 -142.2(3) 7_565 . . . ?
C17 C18 C19 C33 1.0(5) . . . . ?
C18 C19 C20 C1 -136.3(5) . . . . ?
C33 C19 C20 C1 0.0(7) . . . . ?
C18 C19 C20 C20 1.1(5) . . . 7_565 ?
C33 C19 C20 C20 137.4(4) . . . 7_565 ?
C21 C1 C20 C19 -1.0(7) . . . . ?
C2 C1 C20 C19 142.1(5) . . . . ?
C21 C1 C20 C20 -142.8(4) . . . 7_565 ?
C2 C1 C20 C20 0.3(5) . . . 7_565 ?
C2 C1 C21 C34 -136.4(5) . . . . ?
C20 C1 C21 C34 1.7(8) . . . . ?
C2 C1 C21 C22 -0.6(8) . . . . ?
C20 C1 C21 C22 137.5(5) . . . . ?
C5 C4 C22 C23 0.4(7) . . . . ?
C3 C4 C22 C23 138.5(5) . . . . ?
C5 C4 C22 C21 -138.7(5) . . . . ?
C3 C4 C22 C21 -0.6(7) . . . . ?
C1 C21 C22 C4 0.9(7) . . . . ?
C34 C21 C22 C4 141.8(5) . . . . ?
C1 C21 C22 C23 -142.7(5) . . . . ?
C34 C21 C22 C23 -1.8(6) . . . . ?
C4 C22 C23 C35 -142.2(5) . . . . ?
C21 C22 C23 C35 1.2(6) . . . . ?
C4 C22 C23 C24 4.0(8) . . . . ?
C21 C22 C23 C24 147.4(5) . . . . ?
C35 C23 C24 C25 -12.5(7) . . . . ?
C22 C23 C24 C25 -155.1(5) . . . . ?
C35 C23 C24 C6 138.5(5) . . . . ?
C22 C23 C24 C6 -4.1(7) . . . . ?
C7 C6 C24 C25 -0.2(7) . . . . ?
C5 C6 C24 C25 150.8(5) . . . . ?
C7 C6 C24 C23 -150.9(5) . . . . ?
C5 C6 C24 C23 0.1(7) . . . . ?
C23 C24 C25 C37 13.3(7) . . . . ?
C6 C24 C25 C37 -137.5(5) . . . . ?
C23 C24 C25 C26 155.1(5) . . . . ?
C6 C24 C25 C26 4.3(7) . . . . ?
C7 C8 C26 C25 -1.3(7) . . . . ?
C9 C8 C26 C25 -139.5(5) . . . . ?
C7 C8 C26 C27 138.1(5) . . . . ?
C9 C8 C26 C27 -0.1(7) . . . . ?
C24 C25 C26 C8 -3.6(7) . . . . ?
C37 C25 C26 C8 142.6(5) . . . . ?
C24 C25 C26 C27 -147.3(5) . . . . ?
C37 C25 C26 C27 -1.1(6) . . . . ?
C10 C11 C27 C28 137.6(5) . . . . ?
C12 C11 C27 C28 0.1(7) . . . . ?
C10 C11 C27 C26 0.0(7) . . . . ?
C12 C11 C27 C26 -137.6(5) . . . . ?
C8 C26 C27 C11 -0.1(7) . . . . ?
C25 C26 C27 C11 143.9(5) . . . . ?
C8 C26 C27 C28 -142.6(5) . . . . ?
C25 C26 C27 C28 1.4(5) . . . . ?
C11 C27 C28 C29 0.0(7) . . . . ?
C26 C27 C28 C29 142.4(5) . . . . ?
C11 C27 C28 C37 -143.5(5) . . . . ?
C26 C27 C28 C37 -1.1(6) . . . . ?
C37 C28 C29 C13 139.3(5) . . . . ?
C27 C28 C29 C13 0.1(7) . . . . ?
C37 C28 C29 C30 0.0(7) . . . . ?
C27 C28 C29 C30 -139.2(5) . . . . ?
C12 C13 C29 C28 -0.5(7) . . . . ?
C14 C13 C29 C28 -141.8(5) . . . . ?
C12 C13 C29 C30 142.4(5) . . . . ?
C14 C13 C29 C30 1.1(5) . . . . ?
C16 C15 C30 C31 0.5(7) . . . . ?
C14 C15 C30 C31 147.5(5) . . . . ?
C16 C15 C30 C29 -146.5(4) . . . . ?
C14 C15 C30 C29 0.5(5) . . . . ?
C28 C29 C30 C31 -4.8(8) . . . . ?
C13 C29 C30 C31 -148.2(5) . . . . ?
C28 C29 C30 C15 142.4(5) . . . . ?
C13 C29 C30 C15 -1.0(5) . . . . ?
C15 C30 C31 C32 12.5(7) . . . . ?
C29 C30 C31 C32 154.9(5) . . . . ?
C15 C30 C31 C36 -137.3(5) . . . . ?
C29 C30 C31 C36 5.0(7) . . . . ?
C30 C31 C32 C17 -11.9(7) . . . . ?
C36 C31 C32 C17 138.5(5) . . . . ?
C30 C31 C32 C33 -154.9(5) . . . . ?
C36 C31 C32 C33 -4.6(8) . . . . ?
C16 C17 C32 C31 -1.5(7) . . . . ?
C18 C17 C32 C31 -148.0(5) . . . . ?
C16 C17 C32 C33 146.5(5) . . . . ?
C18 C17 C32 C33 0.0(5) . . . . ?
C31 C32 C33 C34 4.7(8) . . . . ?
C17 C32 C33 C34 -142.3(5) . . . . ?
C31 C32 C33 C19 147.7(5) . . . . ?
C17 C32 C33 C19 0.7(6) . . . . ?
C20 C19 C33 C34 0.2(7) . . . . ?
C18 C19 C33 C34 141.6(5) . . . . ?
C20 C19 C33 C32 -142.4(5) . . . . ?
C18 C19 C33 C32 -1.1(6) . . . . ?
C32 C33 C34 C21 139.3(5) . . . . ?
C19 C33 C34 C21 0.5(8) . . . . ?
C32 C33 C34 C35 -0.7(8) . . . . ?
C19 C33 C34 C35 -139.5(5) . . . . ?
C1 C21 C34 C33 -1.5(8) . . . . ?
C22 C21 C34 C33 -141.9(5) . . . . ?
C1 C21 C34 C35 142.2(5) . . . . ?
C22 C21 C34 C35 1.7(6) . . . . ?
C24 C23 C35 C36 -0.1(8) . . . . ?
C22 C23 C35 C36 146.8(5) . . . . ?
C24 C23 C35 C34 -147.0(5) . . . . ?
C22 C23 C35 C34 -0.1(6) . . . . ?
C33 C34 C35 C36 -3.2(8) . . . . ?
C21 C34 C35 C36 -147.3(5) . . . . ?
C33 C34 C35 C23 143.1(5) . . . . ?
C21 C34 C35 C23 -1.0(6) . . . . ?
C23 C35 C36 C37 12.1(8) . . . . ?
C34 C35 C36 C37 153.9(5) . . . . ?
C23 C35 C36 C31 -138.5(5) . . . . ?
C34 C35 C36 C31 3.2(8) . . . . ?
C30 C31 C36 C37 -0.5(7) . . . . ?
C32 C31 C36 C37 -149.9(5) . . . . ?
C30 C31 C36 C35 150.0(5) . . . . ?
C32 C31 C36 C35 0.6(7) . . . . ?
C35 C36 C37 C25 -11.5(7) . . . . ?
C31 C36 C37 C25 139.2(5) . . . . ?
C35 C36 C37 C28 -155.0(5) . . . . ?
C31 C36 C37 C28 -4.3(7) . . . . ?
C24 C25 C37 C36 -1.3(8) . . . . ?
C26 C25 C37 C36 -147.4(5) . . . . ?
C24 C25 C37 C28 146.5(5) . . . . ?
C26 C25 C37 C28 0.4(6) . . . . ?
C29 C28 C37 C36 4.6(8) . . . . ?
C27 C28 C37 C36 147.9(5) . . . . ?
C29 C28 C37 C25 -142.9(5) . . . . ?
C27 C28 C37 C25 0.4(6) . . . . ?
C38 C38 C39 C44 -90.1(10) 7_565 . . . ?
C38 C38 C39 C40 77.2(10) 7_565 . . . ?
C44 C39 C40 C41 6.9(6) . . . . ?
C38 C39 C40 C41 -160.7(4) . . . . ?
C39 C40 C41 C42 -0.8(7) . . . . ?
C40 C41 C42 C43 -6.0(6) . . . . ?
C40 C41 C42 C45 163.9(4) . . . . ?
C41 C42 C43 C44 6.8(6) . . . . ?
C45 C42 C43 C44 -162.9(4) . . . . ?
C40 C39 C44 C43 -6.0(6) . . . . ?
C38 C39 C44 C43 161.4(4) . . . . ?
C42 C43 C44 C39 -0.9(7) . . . . ?
C41 C42 C45 C50 -143.5(4) . . . . ?
C43 C42 C45 C50 25.9(6) . . . . ?
C41 C42 C45 C46 25.6(6) . . . . ?
C43 C42 C45 C46 -165.0(4) . . . . ?
C50 C45 C46 C47 8.3(7) . . . . ?
C42 C45 C46 C47 -161.1(5) . . . . ?
C45 C46 C47 C48 -0.8(8) . . . . ?
C46 C47 C48 C49 -6.7(7) . . . . ?
C46 C47 C48 C51 162.1(5) . . . . ?
C47 C48 C49 C50 6.4(7) . . . . ?
C51 C48 C49 C50 -162.6(4) . . . . ?
C48 C49 C50 C45 1.2(7) . . . . ?
C46 C45 C50 C49 -8.5(7) . . . . ?
C42 C45 C50 C49 161.2(4) . . . . ?
C47 C48 C51 C52 -22.7(7) . . . . ?
C49 C48 C51 C52 145.7(5) . . . . ?
C47 C48 C51 C56 167.4(5) . . . . ?
C49 C48 C51 C56 -24.2(7) . . . . ?
C56 C51 C52 C53 6.8(7) . . . . ?
C48 C51 C52 C53 -163.4(5) . . . . ?
C51 C52 C53 C54 -0.1(8) . . . . ?
C52 C53 C54 C55 -6.4(7) . . . . ?
C52 C53 C54 C57 163.5(5) . . . . ?
C53 C54 C55 C56 6.2(8) . . . . ?
C57 C54 C55 C56 -163.5(5) . . . . ?
C52 C51 C56 C55 -7.0(7) . . . . ?
C48 C51 C56 C55 163.0(5) . . . . ?
C54 C55 C56 C51 0.5(8) . . . . ?
C55 C54 C57 C58 93(3) . . . . ?
C53 C54 C57 C58 -77(3) . . . . ?
C54 C57 C58 C59 3(5) . . . . ?
C57 C58 C59 C60 76(2) . . . . ?
C57 C58 C59 C64 -95(2) . . . . ?
C64 C59 C60 C61 7.7(8) . . . . ?
C58 C59 C60 C61 -163.0(5) . . . . ?
C59 C60 C61 C62 -1.5(8) . . . . ?
C60 C61 C62 C63 -5.7(7) . . . . ?
C60 C61 C62 C65 162.1(5) . . . . ?
C61 C62 C63 C64 6.6(7) . . . . ?
C65 C62 C63 C64 -161.1(5) . . . . ?
C62 C63 C64 C59 -0.5(8) . . . . ?
C60 C59 C64 C63 -6.7(8) . . . . ?
C58 C59 C64 C63 163.8(5) . . . . ?
C63 C62 C65 C66 179.9(5) . . . . ?
C61 C62 C65 C66 12.6(7) . . . . ?
C63 C62 C65 C67 13.6(7) . . . . ?
C61 C62 C65 C67 -153.6(5) . . . . ?
C67 C65 C66 C66 8.7(6) . . . 7_565 ?
C62 C65 C66 C66 -158.2(3) . . . 7_565 ?
C66 C65 C67 C67 -8.6(6) . . . 7_565 ?
C62 C65 C67 C67 158.5(3) . . . 7_565 ?
C77A C76 C77 C78 -3.8(11) . . . . ?
C77A C76 C77 C80 175.8(12) . . . . ?
C76 C77 C78 C79 -1.6(19) . . . . ?
C80 C77 C78 C79 178.8(14) . . . . ?
C77 C78 C79 C78A 5.4(18) . . . . ?
C78 C79 C78A C77A -4(2) . . . . ?
C77 C76 C77A C78A 5.1(12) . . . . ?
C77 C76 C77A C80A -173.8(12) . . . . ?
C79 C78A C77A C76 -1(2) . . . . ?
C79 C78A C77A C80A 178.1(15) . . . . ?
C73 C68 C69 C70 0.3(7) . . . . ?
C73 C68 C69 C74 -179.8(4) . . . . ?
C68 C69 C70 C71 -0.6(7) . . . . ?
C74 C69 C70 C71 179.4(5) . . . . ?
C69 C70 C71 C72 0.5(8) . . . . ?
C70 C71 C72 C73 0.1(7) . . . . ?
C69 C68 C73 C72 0.3(7) . . . . ?
C69 C68 C73 C75 -179.2(4) . . . . ?
C71 C72 C73 C68 -0.5(7) . . . . ?
C71 C72 C73 C75 179.0(4) . . . . ?
C86 C81 C82 C83 0.9(14) . . . . ?
C86 C81 C82 C87 177(2) . . . . ?
C81 C82 C83 C84 -3(3) . . . . ?
C87 C82 C83 C84 -179.7(16) . . . . ?
C82 C83 C84 C85 2(2) . . . . ?
C83 C84 C85 C86 1.3(18) . . . . ?
C82 C81 C86 C85 2.5(18) . . . . ?
C82 C81 C86 C88 179(2) . . . . ?
C84 C85 C86 C81 -4(3) . . . . ?
C84 C85 C86 C88 -179.9(16) . . . . ?
 
_refine_diff_density_max    0.645
_refine_diff_density_min   -0.595
_refine_diff_density_rms    0.065

_shelx_res_file
;

    mo_dd51a1_sq.res created by SHELXL-2014/7


TITL mo_dd51a1_a.res in Pnma
CELL 0.71073 43.960636 24.388602 9.837963 90 90 90
ZERR 4 0.000952 0.00067 0.000206 0 0 0
LATT 1
SYMM 0.5-X,-Y,0.5+Z
SYMM -X,0.5+Y,-Z
SYMM 0.5+X,0.5-Y,0.5-Z

SFAC C H
UNIT 648 304
FLAT 0.05 C77A C76 C77 C78 C80 C78A C80A C79
SIMU 0.01 0.02 1.7 C76 C77 C77A C78 C80 C78A C80A C79
RIGU C14 C13 C15 C12 C29 C16 C30 C11 C28 C17 C31 C27 C10 C37 C18 C32 C36 C26 =
 C9 C25 C19 C33 C35 C8 C24 C20 C34 C23 C7 C6 C1 C21 C22 C5 C2 C4 C3
RIGU C81 C82 C86 C83 C87 C85 C88 C84
RIGU C76 C77 C78 C79 C78A C77A C80 C80A
RIGU C77A C76 C77 C78 C80 C78A C80A C79

L.S. 30 0   29
PLAN  20
ACTA
BOND $H
MORE -1
CONF
fmap 2

REM <HKL>C:/frames/dd51a1/struct/olex2_mo_dd51a1/mo_dd51a1.hkl</HKL>

ABIN
WGHT    0.100000   10.000000
FVAR       1.06187
C1    1    0.719420    0.298159    0.286682    11.00000    0.02941    0.08678 =
         0.05538    0.00111   -0.00839   -0.01748
C2    1    0.719766    0.250000    0.371726    10.50000    0.02742    0.09502 =
         0.05362    0.00000   -0.01086    0.00000
C3    1    0.703158    0.250000    0.492516    10.50000    0.03960    0.08906 =
         0.04385    0.00000   -0.01837    0.00000
C4    1    0.685707    0.297509    0.532036    11.00000    0.04240    0.07901 =
         0.04034   -0.00629   -0.01168   -0.01169
C5    1    0.657728    0.279416    0.593730    11.00000    0.05224    0.08290 =
         0.02358   -0.00774   -0.00767   -0.00543
C6    1    0.629832    0.309520    0.581044    11.00000    0.05234    0.06749 =
         0.02956   -0.01789   -0.00131   -0.00129
C7    1    0.602511    0.279475    0.596645    11.00000    0.04664    0.07423 =
         0.02472   -0.00956    0.00749    0.00102
C8    1    0.574439    0.297906    0.538051    11.00000    0.04075    0.07182 =
         0.04094   -0.01114    0.01149    0.00704
C9    1    0.556319    0.250000    0.501271    10.50000    0.03219    0.07272 =
         0.04079    0.00000    0.01766    0.00000
C10   1    0.539088    0.250000    0.381977    10.50000    0.02544    0.07119 =
         0.05024    0.00000    0.00698    0.00000
C11   1    0.538976    0.297609    0.295613    11.00000    0.03334    0.06419 =
         0.05210   -0.00011    0.00524    0.01414
C12   1    0.538742    0.279761    0.155806    11.00000    0.02799    0.06542 =
         0.05184    0.00046   -0.00387    0.01042
C13   1    0.555422    0.308345    0.058332    11.00000    0.03428    0.06956 =
         0.04676    0.00872   -0.00853    0.01103
C14   1    0.572778    0.277852   -0.042842    11.00000    0.03511    0.07080 =
         0.03409    0.00702   -0.01078    0.00493
C15   1    0.600831    0.307688   -0.065931    11.00000    0.04135    0.08096 =
         0.02690    0.01648   -0.00408   -0.00099
C16   1    0.627873    0.280135   -0.097191    11.00000    0.04302    0.08608 =
         0.02161    0.01236    0.00028   -0.00325
C17   1    0.655491    0.308131   -0.068498    11.00000    0.04276    0.08753 =
         0.02895    0.01706    0.00522   -0.00733
C18   1    0.683740    0.278470   -0.047487    11.00000    0.04101    0.10138 =
         0.03044    0.00725    0.01058   -0.00666
C19   1    0.701897    0.308267    0.050380    11.00000    0.03486    0.09675 =
         0.04334    0.00918    0.00727   -0.01323
C20   1    0.719114    0.280008    0.146957    11.00000    0.02509    0.10143 =
         0.05289    0.00487    0.00358   -0.01287
C21   1    0.702794    0.344557    0.323559    11.00000    0.04629    0.07606 =
         0.05595   -0.00097   -0.00529   -0.02385
C22   1    0.685359    0.343871    0.449147    11.00000    0.04748    0.07033 =
         0.04716   -0.01111   -0.01042   -0.01977
C23   1    0.657439    0.373511    0.426143    11.00000    0.06032    0.05465 =
         0.05858   -0.01528   -0.00504   -0.01544
C24   1    0.629590    0.358722    0.493702    11.00000    0.06100    0.05263 =
         0.04749   -0.02056   -0.00234   -0.00411
C25   1    0.602042    0.373470    0.429084    11.00000    0.05651    0.04587 =
         0.05556   -0.01626    0.00187    0.00970
C26   1    0.574378    0.343585    0.455079    11.00000    0.04947    0.05629 =
         0.04627   -0.01206    0.00913    0.01101
C27   1    0.556384    0.343901    0.331433    11.00000    0.04727    0.04884 =
         0.05602   -0.00735    0.00274    0.01953
C28   1    0.573640    0.372942    0.229991    11.00000    0.05026    0.04900 =
         0.05785    0.00439   -0.00239    0.01290
C29   1    0.573123    0.355314    0.096279    11.00000    0.04089    0.05552 =
         0.05253    0.01439   -0.00701    0.01117
C30   1    0.601134    0.355604    0.018850    11.00000    0.04816    0.05867 =
         0.04812    0.02169   -0.00873    0.00211
C31   1    0.628307    0.377150    0.073144    11.00000    0.05385    0.05178 =
         0.05168    0.01685   -0.00023   -0.00493
C32   1    0.655939    0.356025    0.017407    11.00000    0.04828    0.07317 =
         0.04878    0.01820    0.00283   -0.01510
C33   1    0.684374    0.355897    0.091251    11.00000    0.04296    0.07949 =
         0.05431    0.01358    0.00697   -0.02162
C34   1    0.684847    0.373140    0.224259    11.00000    0.05434    0.06523 =
         0.05949    0.00519   -0.00315   -0.02373
C35   1    0.656748    0.391830    0.287705    11.00000    0.06283    0.04861 =
         0.06321   -0.00184   -0.00200   -0.01934
C36   1    0.628777    0.395605    0.214936    11.00000    0.06394    0.03883 =
         0.06344    0.00585   -0.00201   -0.00320
C37   1    0.601578    0.391193    0.290693    11.00000    0.06010    0.03431 =
         0.06336   -0.00466    0.00140    0.00806
C38   1    0.451959    0.274609    0.235582    11.00000    0.03002    0.04724 =
         0.04419   -0.00492   -0.00277    0.00141
C39   1    0.460985    0.331418    0.239576    11.00000    0.02936    0.04736 =
         0.04038   -0.00326   -0.00331    0.00741
C40   1    0.473861    0.355659    0.123940    11.00000    0.03464    0.04506 =
         0.03812   -0.00255   -0.00271    0.00913
AFIX  43
H40   2    0.471131    0.339674    0.038987    11.00000   -1.20000
AFIX   0
C41   1    0.490630    0.403368    0.136288    11.00000    0.03859    0.04034 =
         0.04072    0.00419   -0.00468    0.00717
AFIX  43
H41   2    0.499232    0.418667    0.058698    11.00000   -1.20000
AFIX   0
C42   1    0.495086    0.429274    0.260576    11.00000    0.03311    0.03950 =
         0.04210   -0.00407   -0.00440    0.00972
C43   1    0.479294    0.407886    0.373151    11.00000    0.03833    0.04716 =
         0.04074   -0.01026   -0.00179    0.01073
AFIX  43
H43   2    0.479953    0.426351    0.455808    11.00000   -1.20000
AFIX   0
C44   1    0.462683    0.359407    0.362433    11.00000    0.03403    0.04332 =
         0.04504   -0.00130    0.00377    0.00380
AFIX  43
H44   2    0.452628    0.345636    0.438275    11.00000   -1.20000
AFIX   0
C45   1    0.519413    0.471249    0.276619    11.00000    0.03861    0.04016 =
         0.04427   -0.00732   -0.00397    0.01424
C46   1    0.530356    0.501957    0.166457    11.00000    0.04957    0.04547 =
         0.05390    0.00986   -0.01765   -0.00161
AFIX  43
H46   2    0.518719    0.504426    0.087750    11.00000   -1.20000
AFIX   0
C47   1    0.558123    0.528686    0.172372    11.00000    0.05946    0.03960 =
         0.05394    0.01163   -0.00910    0.00240
AFIX  43
H47   2    0.564838    0.548346    0.097136    11.00000   -1.20000
AFIX   0
C48   1    0.576292    0.526761    0.289040    11.00000    0.04893    0.03328 =
         0.04912   -0.00162   -0.00630    0.00395
C49   1    0.563669    0.501511    0.404715    11.00000    0.04459    0.05698 =
         0.04102   -0.01740   -0.00591    0.00735
AFIX  43
H49   2    0.574182    0.502669    0.486696    11.00000   -1.20000
AFIX   0
C50   1    0.535740    0.474871    0.398390    11.00000    0.04132    0.04830 =
         0.04020   -0.01117    0.00315    0.00716
AFIX  43
H50   2    0.527745    0.459130    0.476728    11.00000   -1.20000
AFIX   0
C51   1    0.609098    0.540637    0.286839    11.00000    0.04779    0.03997 =
         0.04691    0.00295   -0.00591   -0.00031
C52   1    0.625246    0.537220    0.164717    11.00000    0.06046    0.05060 =
         0.04798    0.00654   -0.01043   -0.00823
AFIX  43
H52   2    0.614640    0.535697    0.083009    11.00000   -1.20000
AFIX   0
C53   1    0.657100    0.536048    0.163118    11.00000    0.05891    0.05204 =
         0.05497    0.00621    0.00268   -0.01625
AFIX  43
H53   2    0.667445    0.533695    0.080865    11.00000   -1.20000
AFIX   0
C54   1    0.673325    0.538411    0.284979    11.00000    0.04802    0.04685 =
         0.05786    0.00861   -0.00399   -0.01528
C55   1    0.657399    0.547489    0.405565    11.00000    0.05173    0.05293 =
         0.05835   -0.00302   -0.01070   -0.01254
AFIX  43
H55   2    0.668068    0.552702    0.486167    11.00000   -1.20000
AFIX   0
C56   1    0.625564    0.548851    0.406779    11.00000    0.05639    0.04917 =
         0.05292   -0.00744   -0.00405   -0.00543
AFIX  43
H56   2    0.615294    0.555260    0.487882    11.00000   -1.20000
AFIX   0
C57   1    0.704786    0.522719    0.286577    11.00000    0.04595    0.05495 =
         0.06221    0.00400   -0.00463   -0.01696
C58   1    0.728902    0.500444    0.287339    11.00000    0.05431    0.05850 =
         0.05581    0.00179    0.00036   -0.01954
C59   1    0.753454    0.461003    0.285678    11.00000    0.04475    0.05687 =
         0.05696   -0.00287    0.00552   -0.01728
C60   1    0.761683    0.435691    0.164466    11.00000    0.05816    0.07655 =
         0.04914    0.01515    0.00827    0.00163
AFIX  43
H60   2    0.755377    0.450701    0.082262    11.00000   -1.20000
AFIX   0
C61   1    0.778942    0.388978    0.164554    11.00000    0.05606    0.08932 =
         0.03679    0.00139    0.00730   -0.01034
AFIX  43
H61   2    0.783744    0.372345    0.082240    11.00000   -1.20000
AFIX   0
C62   1    0.789527    0.365665    0.285585    11.00000    0.03073    0.06758 =
         0.03664   -0.00510    0.00050   -0.01390
C63   1    0.784088    0.394757    0.405324    11.00000    0.04755    0.08387 =
         0.04319   -0.00433   -0.00443   -0.00296
AFIX  43
H63   2    0.792598    0.382487    0.486350    11.00000   -1.20000
AFIX   0
C64   1    0.766410    0.441141    0.405662    11.00000    0.05330    0.08159 =
         0.04783   -0.01351   -0.00408   -0.00508
AFIX  43
H64   2    0.763004    0.459621    0.486938    11.00000   -1.20000
AFIX   0
C65   1    0.800097    0.308262    0.288943    11.00000    0.02271    0.07927 =
         0.03969   -0.00116   -0.00330   -0.00772
C66   1    0.805595    0.278470    0.173106    11.00000    0.12144    0.08294 =
         0.03697    0.00263    0.03272   -0.00312
AFIX  43
H66   2    0.809435    0.296971    0.092245    11.00000   -1.20000
AFIX   0
C67   1    0.798805    0.278395    0.407797    11.00000    0.13113    0.07824 =
         0.04204   -0.00835   -0.03504    0.00174
AFIX  43
H67   2    0.797909    0.296914    0.490335    11.00000   -1.20000
AFIX   0

SAME 0.01 0.02 C68 > C75
PART -1
C76   1    0.501202    0.750007    0.249794    10.50000    0.03676    0.11121 =
         0.07996   -0.02843    0.01615    0.00780
AFIX  43
H76   2    0.480250    0.753771    0.240627    10.50000   -1.20000
AFIX   0
C77   1    0.512331    0.697728    0.255333    10.50000    0.06448    0.10609 =
         0.05288   -0.03602    0.02198    0.00692
C78   1    0.544617    0.693565    0.260623    10.50000    0.07534    0.11019 =
         0.10957   -0.02317    0.01126    0.01076
AFIX  43
H78   2    0.553563    0.659100    0.266803    10.50000   -1.20000
AFIX   0
C79   1    0.563291    0.740356    0.256720    10.50000    0.07670    0.10673 =
         0.14622   -0.01814    0.00336    0.01270
AFIX  43
H79   2    0.584333    0.736764    0.252662    10.50000   -1.20000
AFIX   0
C78A  1    0.549856    0.792451    0.259011    10.50000    0.06527    0.10999 =
         0.13254   -0.02228   -0.00228    0.01840
AFIX  43
H78A  2    0.561946    0.823716    0.262242    10.50000   -1.20000
AFIX   0
C77A  1    0.517776    0.797197    0.256378    10.50000    0.05884    0.11012 =
         0.08567   -0.02463    0.00385    0.00707
C80   1    0.494349    0.647172    0.257014    10.50000    0.07499    0.10746 =
         0.09337   -0.02278    0.02571    0.01444
AFIX 137
H80A  2    0.506178    0.617712    0.219669    10.50000   -1.50000
H80B  2    0.476289    0.652167    0.203569    10.50000   -1.50000
H80C  2    0.488794    0.638502    0.348905    10.50000   -1.50000
AFIX   0
C80A  1    0.505483    0.851786    0.263173    10.50000    0.06946    0.10660 =
         0.01526   -0.02414    0.00827    0.01468
AFIX 137
H80D  2    0.521536    0.877317    0.282426    10.50000   -1.50000
H80E  2    0.490471    0.853545    0.333905    10.50000   -1.50000
H80F  2    0.496238    0.860928    0.177722    10.50000   -1.50000
AFIX   0

PART 0
C68   1    0.617621    0.452617   -0.235165    11.00000    0.04122    0.04537 =
         0.03320    0.00109   -0.00074    0.00016
AFIX  43
H68   2    0.617546    0.414678   -0.244663    11.00000   -1.20000
AFIX   0
C69   1    0.645443    0.479515   -0.237788    11.00000    0.04174    0.05963 =
         0.03333    0.00234   -0.00105   -0.00146
C70   1    0.645207    0.536556   -0.222804    11.00000    0.04540    0.06918 =
         0.05307   -0.00284   -0.00371   -0.01720
AFIX  43
H70   2    0.663487    0.555749   -0.223206    11.00000   -1.20000
AFIX   0
C71   1    0.617864    0.565051   -0.207248    11.00000    0.06973    0.05712 =
         0.05423   -0.00067    0.00061   -0.00915
AFIX  43
H71   2    0.617902    0.603002   -0.198010    11.00000   -1.20000
AFIX   0
C72   1    0.590491    0.536080   -0.205686    11.00000    0.04908    0.05583 =
         0.04627    0.00189   -0.00308    0.00952
AFIX  43
H72   2    0.572276    0.555031   -0.195470    11.00000   -1.20000
AFIX   0
C73   1    0.590012    0.479012   -0.219237    11.00000    0.04076    0.04486 =
         0.03361    0.00166   -0.00147    0.00139
C74   1    0.675156    0.449652   -0.255780    11.00000    0.04576    0.08372 =
         0.06894    0.00322    0.00219   -0.00812
AFIX 137
H74A  2    0.671562    0.410828   -0.254997    11.00000   -1.50000
H74B  2    0.688689    0.459125   -0.182885    11.00000   -1.50000
H74C  2    0.684157    0.459969   -0.340929    11.00000   -1.50000
AFIX   0
C75   1    0.560986    0.448004   -0.215447    11.00000    0.04948    0.06163 =
         0.05603    0.00106   -0.00346    0.00595
AFIX 137
H75A  2    0.562765    0.415749   -0.270813    11.00000   -1.50000
H75B  2    0.544848    0.470663   -0.249598    11.00000   -1.50000
H75C  2    0.556565    0.437536   -0.123477    11.00000   -1.50000
AFIX   0

SAME 0.01 0.02 C68 > C75
PART -1
C81   1    0.751977    0.246724    0.769163    10.50000    0.03983    0.05755 =
         0.03449   -0.00641    0.00003   -0.01137
AFIX  43
H81   2    0.730970    0.250297    0.762363    10.50000   -1.20000
AFIX   0
C82   1    0.769098    0.294610    0.777241    10.50000    0.03642    0.05666 =
         0.01737   -0.00197   -0.00161   -0.01237
C83   1    0.800873    0.288599    0.785537    10.50000    0.03708    0.06574 =
         0.04522   -0.00348   -0.00611   -0.00954
AFIX  43
H83   2    0.813338    0.319408    0.786441    10.50000   -1.20000
AFIX   0
C84   1    0.813603    0.236425    0.792386    10.50000    0.03888    0.06880 =
         0.03390   -0.00092   -0.00604   -0.00386
AFIX  43
H84   2    0.834568    0.232727    0.801112    10.50000   -1.20000
AFIX   0
C85   1    0.795407    0.189493    0.786372    10.50000    0.05136    0.07095 =
         0.02919   -0.00137   -0.00188   -0.00301
AFIX  43
H85   2    0.804287    0.154984    0.792944    10.50000   -1.20000
AFIX   0
C86   1    0.763860    0.194223    0.770491    10.50000    0.05280    0.05801 =
         0.03631   -0.00877    0.00120   -0.00536
C87   1    0.754609    0.349730    0.769150    10.50000    0.05112    0.05758 =
         0.05893   -0.00038    0.00032   -0.01767
AFIX 137
H87A  2    0.741505    0.351217    0.691175    10.50000   -1.50000
H87B  2    0.770091    0.377302    0.761137    10.50000   -1.50000
H87C  2    0.742893    0.356193    0.849925    10.50000   -1.50000
AFIX   0
C88   1    0.744076    0.145421    0.764023    10.50000    0.05101    0.05449 =
         0.04353   -0.00379   -0.00571    0.00348
AFIX 137
H88A  2    0.723397    0.156024    0.781129    10.50000   -1.50000
H88B  2    0.750435    0.119329    0.831336    10.50000   -1.50000
H88C  2    0.745525    0.129158    0.675396    10.50000   -1.50000
AFIX   0
HKLF 4

REM  mo_dd51a1_a.res in Pnma
REM R1 =  0.0766 for    4460 Fo > 4sig(Fo)  and  0.0964 for all    5682 data
REM    814 parameters refined using    632 restraints

END

WGHT      0.1161     15.0590

REM Highest difference peak  0.645,  deepest hole -0.595,  1-sigma level  0.065
Q1    1   0.5044  0.7500  0.1874  10.50000  0.05    0.64
Q2    1   0.5983  0.7314  0.1913  11.00000  0.05    0.60
Q3    1   0.5020  0.6973  0.2736  11.00000  0.05    0.54
Q4    1   0.6281  0.6876  0.0487  11.00000  0.05    0.49
Q5    1   0.8783  0.1898  1.0017  11.00000  0.05    0.47
Q6    1   0.5210  0.7500  0.3410  10.50000  0.05    0.39
Q7    1   0.6208  0.6211 -0.1587  11.00000  0.05    0.39
Q8    1   0.5245  0.8460  0.2649  11.00000  0.05    0.31
Q9    1   0.8755  0.2500  0.1136  10.50000  0.05    0.27
Q10   1   0.6004  0.6916  0.0508  11.00000  0.05    0.26
Q11   1   0.5980  0.7500  0.3324  10.50000  0.05    0.24
Q12   1   0.6262  0.7372 -0.0203  11.00000  0.05    0.24
Q13   1   0.6085  0.7309  0.4450  11.00000  0.05    0.22
Q14   1   0.7188  0.2500  0.1481  10.50000  0.05    0.22
Q15   1   0.6231  0.6837  0.1733  11.00000  0.05    0.22
Q16   1   0.6004  0.7211  0.4783  11.00000  0.05    0.22
Q17   1   0.3995  0.2500  0.0716  10.50000  0.05    0.21
Q18   1   0.4049  0.2973  0.4884  11.00000  0.05    0.20
Q19   1   0.8678  0.2500  0.5535  10.50000  0.05    0.19
Q20   1   0.7073  0.2747  0.0804  11.00000  0.05    0.19
;
_shelx_res_checksum   76777

_shelx_hkl_file
;
   5   0   0 8.14809 25.9999   3
  -5   0   0 18.6584 26.5348   6
  -5   0   0-11.3742 25.9473   5
  -5   0   0-2.78337 22.2452   3
   5   0   0-55.5089 35.4548   5
   5   0   0-22.6471 28.1540   6
   6   0   0 749.833 68.8542   6
  -6   0   0 693.005 67.9888   5
   6   0   0 754.947 66.0543   3
  -6   0   0 701.430 68.9293   6
  -6   0   0 740.113 64.5987   3
   6   0   0 672.989 67.7116   5
   7   0   0-2.84143 39.7139   6
   7   0   0 20.8708 39.7268   3
  -7   0   0 12.4839 35.9096   3
  -7   0   0 3.91792 39.9150   5
  -7   0   0-33.4832 43.9982   6
   7   0   0-0.32125 41.8399   5
   8   0   0 1946.83 123.806   6
  -8   0   0 2230.60 140.042   6
   8   0   0 2018.88 119.642   3
  -8   0   0 1815.89 124.677   5
  -8   0   0 2022.05 126.276   3
   8   0   0 2016.94 132.004   5
   9   0   0 30.3165 49.6896   3
  -9   0   0 107.932 73.1002   6
   9   0   0 90.6941 67.2368   6
   9   0   0 45.1664 65.6329   5
  -9   0   0 1.80957 59.3076   5
  -9   0   0 69.9696 55.8707   3
  10   0   0 7592.79 273.789   5
  10   0   0 8965.51 284.261   6
 -10   0   0 8201.20 278.896   5
 -10   0   0 8723.10 301.007   6
  10   0   0 8823.81 266.269   3
 -10   0   0 8622.15 267.015   2
  11   0   0 329.570 92.6078   3
 -11   0   0 359.519 104.358   5
 -11   0   0 57.6685 86.9182   6
 -11   0   0 79.6601 62.5964   2
 -12   0   0 163530. 1358.74   5
  12   0   0 169917. 1272.59   3
  12   0   0 169917. 1325.24   6
  13   0   0 597.697 113.922   6
  13   0   0 313.904 88.1151   3
 -13   0   0 497.909 109.370   5
  14   0   0 1517.55 140.750   3
  14   0   0 1504.38 148.122   6
 -14   0   0 1242.54 139.788   5
  15   0   0 176.362 90.4359   6
  15   0   0 190.220 95.9813   3
 -15   0   0 94.6180 89.3362   5
  16   0   0 45243.4 774.362   6
 -16   0   0 44986.5 828.728   5
  16   0   0 47594.4 781.435   3
 -17   0   0 23.5283 51.2892   2
  17   0   0 135.095 85.2019   6
  17   0   0 72.7989 71.4856   3
 -17   0   0-5.58134 77.8873   5
 -18   0   0 4082.18 225.016   2
  18   0   0 4225.34 250.758   3
 -18   0   0 3987.68 268.845   5
  18   0   0 4119.06 255.192   6
 -19   0   0-13.5789 55.9112   2
  19   0   0-13.8962 67.9331   3
 -19   0   0 148.256 94.7733   5
  19   0   0 52.3028 81.5795   6
  20   0   0 1954.85 192.019   6
 -20   0   0 1871.67 168.222   2
 -20   0   0 1977.03 212.616   5
  20   0   0 2220.20 203.786   3
  21   0   0 43.6855 88.4531   6
 -21   0   0-52.4109 83.1691   2
 -21   0   0 94.9974 110.187   5
  21   0   0 65.8250 86.3984   3
  22   0   0 18065.6 571.570   6
 -22   0   0 18286.7 526.095   2
 -22   0   0 18039.2 629.986   5
  22   0   0 18738.0 576.195   3
  23   0   0 41.1440 83.2532   6
  23   0   0 46.0057 89.0924   3
 -23   0   0 52.3157 105.779   5
 -23   0   0 181.620 102.671   2
 -24   0   0 7453.97 178.344   4
 -24   0   0 9718.78 496.833   5
 -24   0   0 9164.02 394.716   2
  24   0   0 9706.46 439.870   3
  24   0   0 9162.59 425.870   6
 -25   0   0 134.825 135.027   5
  25   0   0 141.249 112.823   6
 -25   0   0 165.610 97.4237   2
  25   0   0 32.2645 86.9005   3
 -25   0   0-22.6988 39.2308   4
  26   0   0 8461.50 424.159   6
 -26   0   0 8960.29 401.745   2
 -26   0   0 9142.77 503.210   5
 -26   0   0 7785.45 205.348   4
  27   0   0 67.1848 95.3240   6
 -27   0   0 70.3422 52.9473   4
 -27   0   0 42.3523 76.2189   2
 -27   0   0 166.124 130.824   5
 -28   0   0 479.544 112.377   2
 -28   0   0 525.405 164.458   5
 -28   0   0 492.829 79.5731   4
 -29   0   0 37.6004 80.4505   2
 -29   0   0 69.2725 56.4084   4
 -29   0   0 290.487 184.274   5
 -30   0   0 495.857 185.841   5
  30   0   0 1054.82 208.587   3
 -30   0   0 698.287 93.9036   4
 -30   0   0 720.240 140.500   2
  31   0   0 456.064 187.214   3
 -31   0   0 586.389 185.543   2
 -31   0   0 304.630 93.7360   4
 -31   0   0 206.475 178.312   5
 -32   0   0 26060.2 493.460   4
 -32   0   0 29253.7 801.567   2
 -32   0   0 31172.9 1025.38   5
  32   0   0 30261.2 910.863   3
  32   0   0 27186.7 820.045   6
 -33   0   0 168.981 95.7319   4
 -33   0   0 643.645 194.614   2
  33   0   0 511.672 192.472   6
  33   0   0 257.550 174.606   3
 -33   0   0 576.104 233.823   5
  34   0   0 4356.92 375.466   3
  34   0   0 3843.99 343.638   6
 -34   0   0 4080.39 336.256   2
 -34   0   0 4483.65 425.325   5
  35   0   0 733.882 205.278   6
 -35   0   0 628.550 285.842   5
 -35   0   0 540.531 186.955   2
  35   0   0 560.446 199.160   3
  36   0   0 24252.6 858.326   3
  36   0   0 23354.9 817.585   6
 -36   0   0 25502.5 816.614   2
 -36   0   0 26579.8 1016.32   5
 -37   0   0 808.545 301.569   5
 -37   0   0 147.305 167.841   2
  37   0   0 543.175 209.879   6
  37   0   0 565.549 211.667   3
  38   0   0 4116.58 384.504   6
  38   0   0 3833.38 372.878   3
 -38   0   0 4169.85 369.382   2
 -38   0   0 4862.89 514.713   5
  39   0   0 345.350 203.413   3
  39   0   0 463.673 199.890   6
 -39   0   0 500.253 304.802   5
 -39   0   0 173.793 170.018   2
 -40   0   0 6737.41 478.966   2
  40   0   0 6229.87 480.879   3
  40   0   0 6468.85 486.951   6
 -40   0   0 7481.59 624.479   5
 -41   0   0 466.896 242.778   2
 -41   0   0 376.942 293.191   5
  41   0   0 274.624 216.039   6
  41   0   0 121.055 173.835   3
 -42   0   0 4807.70 559.560   5
  42   0   0 4098.35 414.658   3
 -42   0   0 4091.71 402.166   2
  42   0   0 3646.27 392.208   6
 -43   0   0 159.541 322.846   5
  43   0   0 305.659 203.747   6
 -43   0   0 386.462 232.992   2
  43   0   0 210.655 211.839   3
   4   1   0 1229.81 78.0497   6
  -4   1   0-8.89446 14.5838   3
   4   1   0 1353.68 75.7094   3
  -4  -1   0-8.56055 17.8630   2
  -4  -1   0 56.1719 24.5089   3
   4   1   0 856.072 68.2685   5
  -4  -1   0 58.8700 28.8798   6
   4   1   0 1365.18 75.4200   2
   5  -1   0-1.47235 20.0979   3
  -5   1   0 9.79807 16.0803   2
  -5   1   0 12.8593 19.3271   6
  -5  -1   0 0.77199 24.2583   3
   5   1   0-5.49054 25.5267   2
   5   1   0 14.9307 23.1562   3
  -5  -1   0 27.1996 28.7659   2
   5  -1   0 8.22967 18.4655   6
   5   1   0-39.4004 33.3817   5
   5   1   0 39.3994 35.0788   6
  -5   1   0 10.8783 17.5206   3
  -5  -1   0-3.72317 31.1157   6
   5  -1   0-3.54694 17.0235   2
  -5  -1   0-20.8177 34.5960   5
   6   1   0 2205.44 125.498   6
  -6  -1   0 2006.96 123.077   5
   6  -1   0 2436.57 107.343   3
  -6   1   0 2101.94 83.2699   2
  -6   1   0 2007.01 96.8329   5
   6   1   0 2273.51 116.151   3
   6   1   0 2095.89 107.561   2
  -6   1   0 2486.00 111.997   3
  -6  -1   0 2255.87 132.318   6
   6   1   0 2018.47 122.107   5
   6  -1   0 2114.76 87.2500   2
   6  -1   0 2058.26 90.7713   6
  -6  -1   0 2138.26 116.760   3
  -6  -1   0 2271.88 118.043   2
   6  -1   0 1993.70 94.3622   5
  -6   1   0 2240.49 100.401   6
  -7  -1   0-1.95625 37.4719   3
  -7   1   0 28.8716 31.8311   3
  -7   1   0-21.4154 38.3887   5
  -7  -1   0 27.1729 40.7751   2
   7  -1   0-19.3759 26.4698   2
  -7  -1   0-10.6594 45.9149   6
   7   1   0-38.8259 48.6746   5
   7   1   0-24.9585 49.0075   6
   7   1   0-26.7306 39.3837   3
   7  -1   0 44.8174 37.2592   6
   7  -1   0 15.5167 37.0246   3
   7  -1   0-63.9203 42.7407   5
  -7   1   0 14.2965 27.8413   2
   7   1   0 34.5608 33.7252   2
  -7   1   0 31.9703 36.5525   6
  -7  -1   0-31.2269 41.0743   5
   8  -1   0 640.112 67.9847   6
   8   1   0 694.898 97.5765   5
  -8  -1   0 732.844 101.043   6
  -8  -1   0 603.935 86.7400   5
   8   1   0 680.912 89.9055   6
  -8   1   0 675.745 77.7883   5
  -8   1   0 562.530 55.6275   2
   8  -1   0 633.334 66.9723   3
  -8   1   0 684.809 75.4021   3
   8  -1   0 618.833 70.6934   5
  -8  -1   0 649.203 81.2226   2
   8   1   0 626.364 72.0084   2
  -8  -1   0 679.759 82.1374   3
  -8   1   0 661.995 74.1018   6
   8   1   0 642.964 76.5469   3
   9   1   0-75.5197 62.1148   3
  -9   1   0-49.0302 66.7579   6
   9  -1   0-55.2663 50.8819   3
   9   1   0-15.1068 75.2239   5
  -9  -1   0 72.9103 92.3775   6
   9  -1   0 23.6396 63.9094   6
  -9   1   0-66.2213 64.4330   3
   9   1   0-99.1758 73.0800   6
  -9  -1   0 86.0118 105.176   2
   9  -1   0 150.572 81.2758   5
  -9  -1   0-47.8244 60.0813   3
  -9   1   0-30.1431 41.7002   2
  -9  -1   0 120.673 91.6289   5
  -9   1   0 20.4073 73.2356   5
 -10   1   0 264833. 1461.59   5
 -10   1   0 308113. 1580.59   3
 -10  -1   0 184696. 1370.82   2
  10  -1   0 265247. 1454.07   3
  10   1   0 260683. 1512.58   3
  10  -1   0 254401. 1436.43   5
  10  -1   0 266247. 1391.85   6
 -10   1   0 220764. 1119.39   2
 -10   1   0 300206. 1619.05   6
  10   1   0 265293. 1618.72   6
 -10  -1   0 261262. 1658.30   5
  11   1   0-35.6439 59.2735   3
 -11   1   0-37.0452 67.8500   5
  11   1   0-29.8219 74.2709   6
  11  -1   0-31.6078 62.6821   3
 -11  -1   0 223.936 94.5842   5
 -11   1   0 25.7614 57.0962   2
 -11   1   0-50.6739 78.0653   6
  11  -1   0 157.872 85.3015   5
  11  -1   0 196.047 88.3866   6
 -12   1   0 36608.3 606.006   5
  12  -1   0 41754.2 638.775   3
 -12  -1   0 35962.1 667.362   5
  12  -1   0 34430.9 588.368   5
 -12   1   0 35510.1 496.835   2
  12   1   0 38730.6 637.363   3
  12   1   0 37854.0 661.591   6
  12  -1   0 38749.4 587.763   6
 -13   1   0 28.3680 42.2581   2
  13   1   0-104.289 77.5450   6
 -13   1   0-70.5362 67.3864   5
 -13  -1   0 59.0917 37.3161   4
  13  -1   0 8.22863 55.8463   3
  13  -1   0-10.3137 60.9446   6
  13   1   0 15.9633 59.8543   3
 -13  -1   0 56.4238 63.8537   5
 -14   1   0 5495.45 262.292   5
 -14   1   0 5333.37 213.363   2
  14  -1   0 5843.18 258.323   3
 -14  -1   0 5340.09 150.187   4
  14   1   0 5418.81 262.380   3
  14  -1   0 5381.07 241.759   6
  14   1   0 5567.23 278.609   6
 -14  -1   0 5492.05 287.403   5
  15  -1   0 17.2302 65.6430   3
  15   1   0 49.8810 72.4485   6
  15   1   0-60.9116 58.4345   3
 -15   1   0 19.2391 39.1750   2
 -15   1   0-4.56336 63.7161   5
  15  -1   0 59.8170 67.7001   6
 -15  -1   0-70.3262 90.0885   5
 -15  -1   0-49.7274 39.8755   4
 -16  -1   0 97.3112 77.4532   5
  16   1   0 33.2685 71.3250   3
 -16   1   0 45.0315 45.9585   2
  16  -1   0 120.357 72.8302   3
 -16  -1   0 44.6827 33.3640   4
 -16   1   0 32.0605 67.8262   5
  16  -1   0 62.0261 59.1376   6
  16   1   0 59.9709 70.5893   6
  17   1   0 27.2638 75.3519   3
 -17  -1   0 60.8189 41.3750   4
  17  -1   0 19.1387 64.4373   3
 -17   1   0 13.8773 49.7612   2
 -17  -1   0-16.8783 85.2221   5
  17   1   0-40.9726 77.2063   6
  17  -1   0 12.2255 66.1403   6
 -17   1   0 2.98603 65.5752   5
 -18  -1   0 4608.18 299.146   5
 -18  -1   0 4291.05 154.076   4
 -18   1   0 4540.08 226.255   2
  18  -1   0 4921.15 274.992   3
  18   1   0 4600.04 274.647   3
 -18   1   0 4524.33 277.118   5
  18  -1   0 4496.42 253.803   6
  18   1   0 4602.84 283.095   6
  19   1   0 300.206 100.396   3
  19   1   0 251.628 103.622   6
 -19  -1   0 436.570 133.862   5
  19  -1   0 386.348 98.4067   3
  19  -1   0 255.854 88.3043   6
 -19  -1   0 399.922 61.4326   4
 -19   1   0 208.698 74.5193   2
 -19   1   0 137.738 84.7211   5
  20  -1   0 1161.63 152.285   3
 -20   1   0 948.798 118.048   2
 -20   1   0 809.806 134.540   5
  20  -1   0 856.212 121.789   6
  20   1   0 938.095 153.433   6
 -20  -1   0 908.305 154.467   5
  20   1   0 1046.46 144.439   3
 -20  -1   0 914.654 83.4337   4
 -21  -1   0 128.832 56.3581   4
 -21   1   0 43.2485 60.3389   2
 -21  -1   0-20.3730 83.9858   5
  21   1   0-38.6905 75.8335   3
  21  -1   0-18.1941 84.4800   6
 -21   1   0 85.3023 104.486   5
  21   1   0 107.700 90.4123   6
  21  -1   0 47.4993 68.0096   3
 -22   1   0-51.1332 110.569   5
  22   1   0 115.501 98.4717   3
  22  -1   0 156.853 90.8766   6
 -22  -1   0 83.4829 56.3829   4
  22  -1   0 106.714 81.4773   3
 -22   1   0 43.6562 61.9586   2
 -22  -1   0 99.9723 100.566   5
  22   1   0 4.44229 89.8088   6
 -23  -1   0 332.960 67.2681   4
 -23  -1   0 291.013 123.349   5
  23  -1   0 363.461 110.596   6
 -23   1   0 294.926 92.3158   2
  23   1   0 361.119 129.889   6
 -23   1   0 198.569 111.207   5
  23   1   0 349.214 109.553   3
  23  -1   0 376.563 108.625   3
  24  -1   0 1426.24 180.798   3
 -24  -1   0 1262.10 208.153   5
 -24   1   0 1440.56 204.271   5
  24  -1   0 1229.02 165.390   6
 -24   1   0 1431.32 160.720   2
  24   1   0 1352.52 186.557   6
 -24  -1   0 1195.80 154.187   2
  24   1   0 1404.37 183.161   3
 -24  -1   0 1132.76 105.530   4
  25   1   0 585.064 157.365   6
 -25  -1   0 238.315 111.734   2
  25  -1   0 640.768 157.850   3
 -25   1   0 365.931 164.507   5
 -25  -1   0 71.2165 69.1613   4
 -25   1   0 237.454 97.3314   2
 -25  -1   0 529.385 185.544   5
  25  -1   0 571.373 143.269   6
 -26  -1   0 45711.2 1133.50   5
  26  -1   0 41798.4 896.273   6
 -26   1   0 44994.4 1070.94   5
 -26   1   0 42806.2 843.808   2
  26   1   0 41948.5 956.666   6
 -26  -1   0 43681.8 912.314   2
 -27  -1   0 0.63017 143.661   5
 -27   1   0 229.810 153.708   5
 -27  -1   0 76.7172 76.2279   4
  27  -1   0 107.287 99.7848   6
 -27  -1   0 124.287 77.7912   2
 -27   1   0 196.048 107.925   2
 -28  -1   0 268.222 89.0502   4
 -28  -1   0 336.303 114.210   2
  28  -1   0 323.004 115.414   6
 -28   1   0 92.0195 127.130   5
 -28   1   0 390.079 116.336   2
 -28  -1   0 484.625 212.561   5
 -29  -1   0 169.041 92.7180   4
 -29   1   0 221.731 104.864   2
 -29   1   0 162.391 128.501   5
  29   1   0 219.670 137.407   3
 -29  -1   0 168.366 113.450   2
 -29  -1   0-95.1822 159.382   5
 -30  -1   0-67.6638 146.172   5
 -30  -1   0 556.084 124.189   4
  30   1   0 360.323 151.939   3
 -30   1   0 230.746 45.3685   4
  30  -1   0 256.592 155.569   3
 -30   1   0 327.754 124.251   2
 -30  -1   0 233.757 123.091   2
 -30   1   0-30.2545 164.457   5
 -31   1   0 459.578 226.775   5
 -31   1   0-41.2730 45.4311   4
  31   1   0 166.133 141.824   6
 -31  -1   0 184.491 158.936   5
 -31  -1   0 7.12414 98.5427   4
 -31   1   0 3.06703 110.498   2
 -31  -1   0-86.9718 126.152   2
  31   1   0 278.914 159.608   3
  31  -1   0 146.675 146.235   3
 -32   1   0 7585.96 411.722   2
 -32   1   0 8964.17 542.185   5
  32  -1   0 8519.56 479.163   3
 -32   1   0 6762.44 205.516   4
  32   1   0 8039.84 472.762   6
  32   1   0 8734.73 494.651   3
 -32  -1   0 8967.59 569.324   5
 -32  -1   0 7926.54 329.648   4
 -32  -1   0 9177.34 478.468   2
  33   1   0 285.473 163.151   6
  33  -1   0 393.808 167.593   6
 -33  -1   0 219.903 132.880   2
 -33  -1   0 194.396 126.037   4
 -33   1   0 582.682 251.903   5
  33  -1   0 268.974 155.120   3
 -33   1   0 310.677 136.753   2
 -33  -1   0-59.9451 190.663   5
  33   1   0 502.437 197.922   3
 -34  -1   0 5015.01 291.284   4
 -34   1   0 5254.48 362.412   2
  34  -1   0 5114.99 378.546   6
  34  -1   0 5403.41 400.557   3
 -34  -1   0 5488.35 389.244   2
 -34   1   0 5442.46 457.132   5
  34   1   0 5256.87 407.291   3
 -34  -1   0 5926.89 490.620   5
  34   1   0 5405.66 417.654   6
 -35  -1   0 189.981 217.154   5
 -35   1   0 238.498 161.617   2
 -35   1   0 181.808 218.667   5
  35  -1   0 127.056 155.533   6
  35   1   0 203.315 169.974   6
  35   1   0 205.402 182.997   3
 -35  -1   0 263.210 182.788   2
  35  -1   0 221.164 178.522   3
  36   1   0 12558.7 617.501   6
 -36  -1   0 14419.5 776.818   5
  36  -1   0 13198.3 632.086   3
 -36   1   0 13287.5 568.045   2
  36   1   0 14333.1 691.305   3
  36  -1   0 12917.3 610.146   6
 -36  -1   0 13410.1 607.370   2
 -36   1   0 14443.3 755.238   5
  37   1   0 828.941 254.506   6
 -37  -1   0 262.845 166.495   2
  37  -1   0 566.403 196.458   3
  37   1   0 680.817 219.414   3
 -37   1   0 313.136 235.555   5
  37  -1   0 347.949 184.367   6
 -37   1   0 579.881 200.029   2
 -37  -1   0 711.533 300.519   5
  38   1   0 274.872 175.393   6
 -38   1   0 419.283 286.108   5
  38  -1   0 529.130 210.835   3
  38  -1   0 59.5913 173.045   6
 -38  -1   0 170.366 253.146   5
 -38  -1   0 16.4969 181.453   2
 -38   1   0 351.126 190.276   2
  38   1   0 505.328 218.894   3
  39  -1   0-95.6162 174.443   3
  39  -1   0 16.4217 167.387   6
  39   1   0 480.714 210.964   6
 -39  -1   0 325.600 295.313   5
  39   1   0 242.110 217.863   3
 -39   1   0-137.846 197.904   2
 -39  -1   0 298.036 221.016   2
 -39   1   0-282.012 288.897   5
  40  -1   0 3984.96 387.395   3
  40   1   0 4041.65 407.393   3
 -40  -1   0 4260.88 397.448   2
 -40  -1   0 4491.76 513.709   5
 -40   1   0 4397.69 384.923   2
 -40   1   0 4576.79 523.678   5
  40  -1   0 3497.24 365.010   6
  40   1   0 3667.35 387.410   6
  41  -1   0 397.461 205.520   6
 -41  -1   0-228.164 340.914   5
  41   1   0 367.446 206.286   3
  41   1   0 228.079 205.609   6
 -41   1   0 471.781 231.835   2
  41  -1   0 213.352 179.548   3
 -41  -1   0 330.750 241.661   2
 -41   1   0 279.375 338.691   5
  42   1   0 264.540 193.238   3
 -42  -1   0 409.432 229.965   2
  42  -1   0 153.338 186.982   6
  42   1   0 213.346 195.719   6
  42  -1   0 480.803 214.820   3
 -42   1   0 418.196 320.829   5
 -42   1   0 161.359 209.848   2
 -42  -1   0 475.077 295.918   5
 -43   1   0 181.849 324.472   5
  43   1   0-284.561 200.483   6
 -43   1   0 250.648 244.106   2
 -43  -1   0-152.539 307.182   5
  43  -1   0 92.7917 201.855   6
 -43  -1   0-4.90386 225.756   2
  43   1   0 212.814 242.276   3
  43  -1   0 95.1447 182.384   3
   3   2   0 20.4683 33.0731   4
  -3  -2   0 11.8040 28.2881   5
   3   2   0 2.24320 26.8462   6
   3  -2   0 12.8749 14.6844   3
  -3   2   0-4.74094 15.7784   3
  -3  -2   0 27.5395 26.0871   6
   3   2   0 29.9526 27.4734   5
  -3  -2   0-15.8166 23.9792   2
   3   2   0 22.4725 24.1308   2
  -3  -2   0 23.5488 31.1544   4
   4   2   0 3472.27 136.223   2
  -4  -2   0 3476.84 152.104   6
  -4  -2   0 3364.46 150.215   5
  -4  -2   0 3566.48 141.397   2
   4   2   0 3686.65 140.876   3
   4  -2   0 3904.89 96.0689   2
   4   2   0 3591.23 154.954   6
   4   2   0 3912.14 148.361   4
   4   2   0 3190.21 146.908   5
  -4  -2   0 3517.33 141.144   3
  -4   2   0 2987.66 102.406   3
  -4  -2   0 3653.27 143.910   4
  -4   2   0 3372.59 89.6921   2
   4  -2   0 3710.87 112.621   3
  -5   2   0-4.39044 15.0380   2
   5   2   0-7.12910 41.3526   5
   5   2   0 40.7123 40.9506   6
  -5  -2   0 102.725 44.7672   4
   5   2   0 46.6059 30.8346   3
  -5  -2   0 7.01683 32.9076   2
   5  -2   0 42.7035 24.2997   3
   5  -2   0-0.94395 18.1030   2
   5   2   0 104.497 39.5649   4
  -5  -2   0 94.3867 46.2556   5
  -5  -2   0 31.5012 30.9008   3
  -5   2   0-2.35950 20.7813   3
   5   2   0-0.34263 27.3097   2
  -5  -2   0 30.3981 42.5137   6
  -6  -2   0 114.464 50.8682   5
   6   2   0 142.598 37.0243   2
  -6   2   0 181.360 29.7057   2
   6   2   0 130.390 53.0010   5
  -6  -2   0 201.596 55.3612   2
  -6   2   0 159.098 31.2722   6
   6  -2   0 159.913 30.3660   2
   6  -2   0 223.728 32.8008   6
  -6  -2   0 172.484 57.7583   6
   6  -2   0 177.549 39.1276   3
   6   2   0 98.8558 44.6873   6
  -6  -2   0 196.771 51.4952   3
   6   2   0 180.911 43.8316   3
  -6   2   0 188.217 39.9847   3
   6   2   0 221.226 48.4414   4
  -6  -2   0 161.149 48.0661   4
  -7  -2   0-43.1197 55.9077   5
   7  -2   0-40.4181 35.4884   3
  -7  -2   0-22.9462 49.2372   3
   7   2   0-7.25044 38.2540   3
  -7   2   0-9.21201 30.0472   6
   7  -2   0-14.3614 28.7000   6
  -7   2   0 50.2352 34.2068   5
   7   2   0-95.0735 71.9243   5
  -7  -2   0-41.2898 70.9049   6
  -7  -2   0-31.3910 49.4281   2
  -7  -2   0-2.91858 46.7860   4
   7   2   0-5.41207 48.4295   6
  -7   2   0-7.80864 26.9836   2
   7  -2   0 41.6028 32.3518   2
   7   2   0 41.9961 40.1608   4
  -7   2   0 3.69673 32.7996   3
   7   2   0 12.8841 38.4171   2
   8  -2   0 85700.6 612.698   6
  -8   2   0 82876.2 648.212   5
   8   2   0 85987.6 895.479   6
   8  -2   0 92992.5 753.333   3
  -8   2   0 87415.8 657.834   6
   8   2   0 89791.7 655.063   4
   8   2   0 91207.6 865.573   2
  -8   2   0 93693.9 783.176   3
   8  -2   0 85316.5 614.691   2
   8   2   0 87393.6 832.271   3
  -8  -2   0 90016.6 739.934   4
  -8   2   0 86357.8 599.534   2
  -8  -2   0 95550.5 936.335   2
  -8  -2   0 84127.5 904.729   5
  -8  -2   0 99409.6 945.872   3
   9   2   0-33.9299 55.4483   2
  -9   2   0-7.79410 46.4380   6
   9   2   0-22.4341 46.0084   3
  -9   2   0-46.1339 53.3165   3
   9   2   0-15.9458 72.2596   6
  -9  -2   0 45.8200 71.7696   5
  -9   2   0 32.2069 38.3913   2
   9  -2   0-15.6027 50.3830   3
   9  -2   0-65.0708 49.2331   6
   9   2   0 43.7463 43.4685   4
  -9   2   0-40.1086 57.4406   5
   9  -2   0 31.9515 37.5273   2
  -9  -2   0-54.3434 56.2378   4
  10   2   0 67583.1 794.477   3
 -10  -2   0 70742.7 670.546   4
  10  -2   0 71762.0 729.303   3
  10  -2   0 62059.6 638.920   5
  10  -2   0 68233.2 635.616   6
  10   2   0 73896.0 553.713   4
 -10   2   0 69253.2 609.693   2
  10   2   0 68049.3 862.965   6
 -10  -2   0 66537.5 875.737   5
  10   2   0 67619.0 782.298   2
 -10   2   0 71014.1 721.179   5
 -10   2   0 70432.8 706.140   6
  10  -2   0 64268.4 610.642   2
  11  -2   0-103.126 65.9102   6
  11   2   0 16.0306 63.4315   2
  11  -2   0 28.6585 81.1721   5
  11   2   0-87.7451 87.8821   6
 -11  -2   0 126.256 98.9037   5
 -11  -2   0-65.9665 47.8195   4
 -11   2   0-109.662 78.5745   6
  11  -2   0-30.9688 54.9302   2
  11  -2   0-93.9923 66.8223   3
  11   2   0-70.2624 67.4232   3
 -11   2   0-99.2045 61.3993   5
 -11   2   0-41.7194 54.6626   2
  12   2   0 169644. 1357.87   3
  12  -2   0 170425. 1132.08   6
 -12   2   0 172468. 1068.05   2
 -12   2   0 169093. 1233.56   5
  12  -2   0 159918. 1090.01   2
  12   2   0 164668. 1309.93   2
  12  -2   0 180022. 1273.15   3
 -12  -2   0 165014. 1488.00   5
  12  -2   0 156480. 1163.76   5
 -12   2   0 177965. 1299.39   6
 -12  -2   0 173423. 1080.95   4
  12   2   0 168478. 1457.16   6
  13   2   0-29.8730 57.4549   2
  13   2   0-70.7396 77.9030   6
 -13   2   0-21.4600 44.7831   2
 -13  -2   0 188.863 105.834   5
 -13   2   0-14.6014 52.8152   5
  13  -2   0 13.4044 50.8018   3
  13  -2   0 19.0943 61.3119   6
 -13   2   0 92.5295 90.4562   6
  13   2   0-67.8174 64.7524   3
  13  -2   0 44.6480 70.6295   5
 -13  -2   0 69.2501 53.9112   4
  14   2   0 621.062 91.9300   3
 -14  -2   0 715.967 80.9318   4
 -14   2   0 735.197 103.466   5
  14  -2   0 785.171 93.6437   6
  14  -2   0 832.309 101.595   3
  14   2   0 728.378 117.260   6
 -14   2   0 682.883 77.4001   2
 -14  -2   0 749.291 123.908   5
 -15  -2   0 1.19872 69.3208   5
 -15   2   0-120.509 82.5747   5
 -15   2   0 30.8709 38.2391   2
  15   2   0-36.9858 63.4297   3
  15   2   0-99.9669 65.1895   6
  15  -2   0-8.89975 49.3241   6
 -15  -2   0 2.06508 48.7146   4
  15  -2   0 50.1988 54.3765   3
  16  -2   0 15765.1 410.010   6
 -16  -2   0 15938.4 351.978   4
  16   2   0 15811.7 503.437   6
 -16   2   0 15958.4 454.682   5
 -16   2   0 15616.2 375.375   2
 -16  -2   0 15417.6 523.600   5
  16  -2   0 16661.7 449.908   3
  16   2   0 16109.0 480.223   3
 -17  -2   0 75.6862 76.0516   5
 -17   2   0 164.456 66.6335   2
  17   2   0 103.096 91.5554   6
  17   2   0 145.092 75.7135   3
  17  -2   0 231.441 74.4685   6
 -17   2   0 60.2511 72.3939   5
 -17  -2   0 75.7424 51.9466   4
  17  -2   0 188.446 79.3073   3
 -18  -2   0 474.126 119.525   5
 -18   2   0 413.686 80.8130   2
  18  -2   0 476.461 97.7348   3
  18   2   0 449.966 116.186   3
  18  -2   0 342.716 89.2886   6
 -18  -2   0 464.541 79.4163   4
  18   2   0 467.350 123.080   6
 -18   2   0 346.780 98.5722   5
 -19   2   0 63.6768 89.2016   5
 -19  -2   0 62.1842 96.2038   5
 -19  -2   0 23.2276 57.6293   4
  19  -2   0-32.3609 66.1882   3
  19   2   0-15.5137 89.8319   6
  19   2   0-4.89043 77.8948   3
  19  -2   0 39.0295 73.2780   6
 -19   2   0-21.1847 64.0532   2
 -20  -2   0 14091.9 360.487   4
  20   2   0 14324.5 530.348   6
  20  -2   0 15045.7 479.845   3
 -20   2   0 14177.9 408.261   2
  20  -2   0 13941.2 437.359   6
 -20   2   0 13932.7 488.895   5
 -20  -2   0 14011.9 558.518   5
  20   2   0 15305.6 521.188   3
  21  -2   0-8.38904 65.3360   6
  21  -2   0 107.127 84.8457   3
 -21   2   0 174.204 90.0797   2
 -21   2   0 145.552 111.855   5
  21   2   0-7.77691 87.0601   3
 -21  -2   0 67.3834 134.917   5
 -21  -2   0 77.5418 74.1239   4
  21   2   0-35.4722 92.4708   6
  22  -2   0 6659.84 320.656   6
  22  -2   0 7309.52 353.457   3
  22   2   0 6956.66 372.699   3
 -22   2   0 6451.16 356.559   5
 -22  -2   0 6396.92 399.860   5
  22   2   0 6793.94 383.956   6
 -22   2   0 7125.64 306.005   2
  23  -2   0 66.3535 66.3569   6
  23   2   0-37.2091 95.5422   3
 -23  -2   0-34.7197 73.3034   4
  23   2   0 8.10620 107.279   6
 -23   2   0 96.6068 73.0620   2
 -23   2   0 41.0773 91.6856   5
  23  -2   0 46.5993 77.4049   3
 -23  -2   0 72.6076 107.247   5
 -24  -2   0 7172.91 444.245   5
  24  -2   0 7587.03 377.050   3
  24   2   0 6752.77 397.296   6
 -24   2   0 7300.92 328.152   2
 -24   2   0 7523.48 411.133   5
  24  -2   0 7292.63 354.634   6
  24   2   0 7194.23 401.163   3
  25   2   0 49.2760 100.105   6
 -25  -2   0 77.9232 85.0044   4
  25  -2   0 174.607 101.334   3
 -25   2   0 135.136 91.5267   2
  25  -2   0 100.236 83.6024   6
 -25  -2   0 102.663 120.771   5
 -25   2   0-94.4411 122.960   5
 -26  -2   0 5996.55 433.335   5
  26  -2   0 5955.81 346.565   3
  26  -2   0 5353.64 313.580   6
 -26   2   0 5604.37 375.644   5
 -26   2   0 5403.56 291.115   2
 -27   2   0 59.7910 79.8665   2
 -27  -2   0 306.517 188.439   5
 -27   2   0 211.782 151.282   5
  27  -2   0-85.0536 94.5901   6
 -27  -2   0-102.164 99.5685   4
 -28   2   0 35.3821 70.0212   2
 -28  -2   0-21.3802 85.9824   4
 -28  -2   0 105.077 151.672   5
 -28   2   0 8.44390 119.801   5
  28   2   0-125.471 137.320   3
  28  -2   0 165.524 98.6345   6
  29   2   0-90.5040 133.375   6
 -29   2   0-83.2641 150.338   5
 -29   2   0-6.43434 73.0634   2
 -29  -2   0 60.8476 106.514   4
 -29  -2   0-125.147 123.450   2
  29  -2   0 64.7479 91.6189   6
  29   2   0 138.462 129.336   3
 -29  -2   0 163.868 172.565   5
  30  -2   0 125.261 113.617   3
  30   2   0 227.652 133.138   3
 -30  -2   0 283.414 143.107   5
  30   2   0 257.541 152.694   6
 -30   2   0 329.554 173.412   5
 -30  -2   0 115.518 120.617   2
 -30  -2   0 231.128 124.958   4
 -30   2   0 384.815 119.735   2
  31  -2   0-16.8801 115.220   3
 -31  -2   0 79.0942 129.477   2
  31   2   0-1.19294 143.968   6
 -31   2   0-264.632 215.402   5
 -31  -2   0 244.703 136.798   4
  31   2   0 288.331 160.474   3
 -31   2   0-85.6807 113.369   2
 -31  -2   0 347.362 197.050   5
  32   2   0 1335.37 236.210   3
 -32   2   0 1214.97 184.265   2
 -32  -2   0 1434.21 231.474   2
 -32  -2   0 1479.54 199.557   4
  32  -2   0 1096.94 198.282   3
  32   2   0 1215.48 230.019   6
 -32  -2   0 1268.50 273.958   5
 -32   2   0 1471.22 272.754   5
  33   2   0 179.603 171.613   6
 -33  -2   0 418.768 166.143   4
 -33  -2   0 313.243 184.117   2
 -33   2   0 287.502 158.137   2
  33  -2   0 564.958 190.458   3
 -33   2   0 336.064 213.415   5
 -33  -2   0 492.582 234.900   5
  33   2   0 215.195 175.246   3
 -34   2   0 27307.3 969.673   5
 -34   2   0 26429.5 758.243   2
 -34  -2   0 25784.4 996.704   5
 -34  -2   0 26642.1 858.386   2
  34  -2   0 24155.4 775.963   6
 -34  -2   0 24742.9 664.568   4
  34  -2   0 25086.7 823.364   3
  34   2   0 26001.8 880.188   3
  34   2   0 23414.5 844.256   6
  35   2   0 254.369 186.446   6
 -35  -2   0 271.136 172.846   4
 -35   2   0 221.841 236.685   5
  35  -2   0 213.608 146.255   6
 -35   2   0 392.467 171.228   2
  35  -2   0 311.422 171.744   3
  35   2   0 157.926 189.369   3
 -35  -2   0 174.823 215.906   5
 -35  -2   0 177.652 166.921   2
 -36  -2   0 3369.72 423.670   5
  36   2   0 2677.53 316.711   3
  36  -2   0 2357.60 286.881   6
  36  -2   0 2669.99 311.781   3
 -36   2   0 3100.32 307.254   2
 -36   2   0 3083.88 399.278   5
  36   2   0 2485.58 315.945   6
 -36  -2   0 3135.78 339.805   2
 -37   2   0 15.2971 250.454   5
  37  -2   0 159.231 179.038   3
 -37   2   0 204.667 169.922   2
 -37  -2   0 193.615 268.177   5
  37  -2   0 188.311 170.205   6
 -37  -2   0-30.5032 168.978   2
  37   2   0-1.89108 167.030   3
  37   2   0 127.520 167.372   6
 -38  -2   0 3042.38 427.464   5
  38   2   0 2682.00 336.020   3
 -38  -2   0 2469.92 323.033   2
 -38   2   0 2854.85 420.105   5
 -38   2   0 2865.25 322.368   2
  38  -2   0 2474.46 311.852   6
  38  -2   0 2355.62 301.633   3
  38   2   0 2422.40 329.154   6
  39  -2   0 113.234 170.747   6
 -39   2   0 416.544 329.287   5
 -39   2   0-39.5941 193.870   2
  39  -2   0 146.367 161.197   3
  39   2   0 470.813 212.636   3
  39   2   0 56.9056 213.172   6
 -39  -2   0 554.613 238.896   2
 -39  -2   0 180.897 274.589   5
  40   2   0 2365.02 347.843   3
 -40  -2   0 2151.97 321.241   2
 -40  -2   0 2734.28 433.880   5
  40   2   0 1917.54 302.899   6
 -40   2   0 2372.60 305.219   2
 -40   2   0 2456.24 433.586   5
  40  -2   0 1885.24 264.773   3
  40  -2   0 1980.07 281.810   6
  41   2   0 172.240 199.929   3
 -41  -2   0 12.0895 215.542   2
 -41   2   0 217.076 321.185   5
  41  -2   0 142.243 181.808   3
  41  -2   0 20.2230 170.407   6
 -41  -2   0 384.439 304.321   5
  41   2   0-204.366 217.206   6
 -41   2   0-91.7611 208.432   2
  42  -2   0 287.516 209.719   3
  42   2   0 198.705 230.454   3
 -42  -2   0 614.544 330.597   5
 -42  -2   0 387.916 256.361   2
  42  -2   0 225.352 198.370   6
 -42   2   0-165.957 211.012   2
 -42   2   0 538.709 353.724   5
  42   2   0 304.423 197.318   6
  43  -2   0-554.273 247.843   6
  43   2   0 110.612 186.887   3
  43  -2   0-101.324 168.279   3
 -43  -2   0-268.534 324.275   5
 -43   2   0-152.939 313.692   5
 -43   2   0-330.797 250.315   2
  43   2   0 46.7524 196.609   6
 -43  -2   0 196.549 270.409   2
   0   3   0 27.4367 28.4184   5
   0   3   0-10.7882 19.3085   2
   0   3   0-36.9021 37.6149   4
   0   3   0 6.58208 23.2998   6
   0  -3   0-13.6567 25.4556   6
   0  -3   0 10.8586 37.0180   4
   0  -3   0 34.0674 26.3645   5
   0  -3   0-14.5143 21.4605   2
  -1  -3   0 2.85257 25.0464   2
   1   3   0-11.6825 24.0067   2
  -1   3   0 1.46777 19.2370   2
   1  -3   0 51.5405 27.3316   6
   1  -3   0-0.42356 20.3380   2
   1   3   0 21.5193 32.7650   5
  -1   3   0-86.1408 43.1550   4
   1  -3   0 25.8867 39.9108   4
  -1   3   0-12.0041 23.2167   6
   1   3   0 12.5245 27.5537   6
  -1  -3   0-35.0514 37.4106   4
  -1  -3   0 8.65950 27.6869   6
  -1  -3   0-18.9175 32.6495   5
   1   3   0-34.5905 38.5294   4
   2   3   0 466.457 65.7322   5
   2   3   0 439.272 60.1528   6
   2  -3   0 472.536 40.7629   6
  -2  -3   0 405.804 58.7522   5
  -2   3   0 564.371 66.3204   4
   2   3   0 568.856 77.5666   4
   2   3   0 491.674 58.3169   2
  -2  -3   0 435.650 62.1502   4
   2  -3   0 381.287 52.3640   4
  -2  -3   0 482.302 56.3004   2
   2  -3   0 530.973 45.7808   2
  -2   3   0 471.253 41.4722   6
  -2  -3   0 490.113 62.3274   6
  -2   3   0 439.399 40.9795   2
  -3  -3   0 41.1681 33.4499   2
   3   3   0 17.7384 48.0226   4
  -3   3   0 1.13154 17.9299   2
   3   3   0 38.9437 35.0646   2
  -3  -3   0 50.1283 42.1708   6
  -3   3   0 21.9623 31.6108   4
  -3  -3   0 34.8435 39.2564   5
  -3  -3   0 23.1209 41.3934   4
   3   3   0 42.9594 40.8709   5
   3  -3   0-9.89627 21.4838   2
  -3   3   0 11.3378 18.2944   6
   3   3   0 69.9405 38.5190   6
   3  -3   0 12.6488 20.4780   6
   4   3   0 1581.96 121.929   4
  -4   3   0 1555.45 85.6875   3
  -4   3   0 1417.27 62.6244   6
   4  -3   0 1548.90 71.5651   2
   4   3   0 1355.86 105.907   6
  -4   3   0 1446.42 68.3789   2
  -4  -3   0 1406.18 102.302   2
  -4  -3   0 1430.54 113.407   5
   4   3   0 1354.69 110.176   5
   4   3   0 1392.04 99.1238   2
  -4  -3   0 1312.34 106.221   6
  -4  -3   0 1237.37 104.854   4
  -5   3   0 21.4266 24.9534   3
  -5  -3   0 18.6494 52.5443   4
  -5   3   0-19.6215 23.7048   2
  -5  -3   0-8.36365 49.5945   5
  -5   3   0 18.4726 20.7262   6
   5   3   0 17.0442 55.6231   5
   5  -3   0 29.5446 30.7094   3
   5  -3   0 4.10944 23.8998   2
   5   3   0-32.7013 55.1299   4
   5   3   0-3.81694 35.3393   3
   5   3   0-25.7272 35.1950   2
  -5  -3   0 39.4893 46.3791   2
   5   3   0-49.9218 53.0007   6
  -5  -3   0-13.6442 50.6518   6
   6   3   0 86349.0 939.230   5
  -6  -3   0 79008.4 824.423   2
  -6   3   0 76506.8 498.750   6
  -6  -3   0 86470.0 945.595   6
   6  -3   0 73636.2 463.745   6
  -6  -3   0 74129.1 845.640   5
   6  -3   0 75545.4 517.935   2
   6   3   0 78312.2 805.702   4
  -6  -3   0 78155.9 809.233   4
   6   3   0 75065.4 762.542   3
   6  -3   0 76162.5 622.704   3
  -6   3   0 72191.8 491.813   2
  -6   3   0 74305.6 627.154   3
   6   3   0 75321.5 848.808   6
   6   3   0 72588.0 753.956   2
   7   3   0 224.546 71.4512   4
  -7  -3   0 70.2150 59.7158   5
  -7  -3   0 94.6130 52.4075   4
   7  -3   0 107.281 35.7809   2
   7   3   0 96.1865 57.8566   6
  -7   3   0 98.7260 32.5492   2
   7   3   0 70.4274 50.6264   2
  -7   3   0 76.8864 39.6507   3
   7  -3   0 105.399 30.0982   6
   7  -3   0 134.923 42.7992   3
   7   3   0 105.448 48.6649   3
  -7   3   0 150.314 38.6527   6
   8  -3   0 3176.55 144.679   3
   8   3   0 3041.88 169.540   2
   8   3   0 3015.11 162.169   4
  -8   3   0 2957.46 113.439   5
  -8   3   0 2883.53 99.4317   5
   8   3   0 3028.34 169.816   3
   8   3   0 2903.63 187.400   6
   8  -3   0 3252.93 125.520   2
  -8   3   0 3090.67 115.030   2
  -8  -3   0 3187.47 198.710   5
  -8  -3   0 3109.47 172.195   4
   8  -3   0 3261.10 118.086   6
  -8   3   0 2967.73 148.005   3
  -8   3   0 3089.41 120.105   6
   9   3   0 48.6978 55.3718   2
   9  -3   0 24.4167 40.2939   2
   9  -3   0 68.2994 46.4658   3
  -9  -3   0 34.7804 58.9826   4
  -9  -3   0 79.5631 71.1120   5
  -9   3   0 43.9929 37.7408   2
  -9   3   0 29.0938 51.2816   3
  -9   3   0 18.6988 41.3415   5
   9  -3   0 29.2456 35.5995   6
   9   3   0 45.3336 61.6837   6
  -9   3   0 58.6185 42.2401   5
   9   3   0 86.8896 61.2331   3
  -9   3   0 72.2534 42.0562   6
   9   3   0 156.726 67.0417   4
  10   3   0 55514.7 823.890   6
  10  -3   0 60789.2 679.004   3
 -10  -3   0 55935.2 858.209   5
 -10  -3   0 58619.2 730.077   4
  10   3   0 57004.4 779.318   3
  10  -3   0 55001.2 530.715   6
  10   3   0 57228.6 772.330   2
 -10   3   0 57736.7 586.139   6
 -10   3   0 59795.6 564.791   5
 -10   3   0 56461.5 530.111   2
  10  -3   0 57852.8 579.961   2
  10   3   0 58907.4 660.542   4
 -10   3   0 55949.2 569.406   5
 -11  -3   0-7.35277 61.4047   4
  11  -3   0 71.7681 43.3330   3
 -11   3   0 6.79342 41.1018   2
 -11   3   0 41.8579 45.6745   6
 -11  -3   0 101.726 72.2048   5
  11  -3   0 69.3005 39.7747   6
  11   3   0 60.8819 63.4476   3
  11   3   0 149.294 59.2242   4
  11  -3   0-5.77405 43.7878   2
  11   3   0 33.8920 65.7478   6
  11   3   0 67.1286 58.6627   2
 -11   3   0-48.3060 60.9180   5
  12  -3   0 37161.1 516.771   2
  12   3   0 38320.9 731.128   6
 -12  -3   0 38964.0 766.344   5
 -12   3   0 32856.9 515.853   5
 -12  -3   0 39555.6 619.128   4
  12   3   0 39836.6 689.595   2
  12  -3   0 39229.1 499.239   6
  12   3   0 41544.9 535.571   4
  12  -3   0 41477.6 610.430   3
 -12   3   0 38985.5 565.395   6
 -12   3   0 40415.0 498.708   2
  12   3   0 39481.3 685.504   3
  13  -3   0 99.9053 70.0048   2
  13  -3   0-20.9960 49.4169   3
 -13   3   0-58.9822 51.4733   2
 -13  -3   0-11.0284 77.6417   5
  13   3   0-47.3366 69.3865   2
  13   3   0-18.9598 47.8263   4
  13   3   0-35.4213 64.9418   3
 -13   3   0-186.635 90.7908   6
 -13   3   0-34.7827 59.6216   5
  13  -3   0-34.7644 50.7260   6
  13   3   0-84.4350 86.5367   6
 -13  -3   0 1.92384 63.8793   4
 -14  -3   0 66712.7 823.572   4
  14   3   0 64852.8 931.068   3
  14   3   0 64159.2 909.528   2
  14   3   0 70704.2 637.846   4
  14  -3   0 68192.5 845.308   3
  14   3   0 63829.8 994.245   6
 -14   3   0 66541.5 802.914   5
  14  -3   0 64721.4 716.362   6
 -14   3   0 65740.1 694.648   2
 -14  -3   0 66893.6 1066.66   5
  15   3   0-35.5137 66.6554   2
 -15   3   0-49.2497 46.4911   2
  15   3   0-16.5379 65.2131   3
  15   3   0-53.6144 77.5354   6
 -15   3   0 62.4796 64.7133   5
  15  -3   0-66.7690 54.6665   3
 -15  -3   0 90.2507 78.9828   5
  15  -3   0 0.52632 49.4410   6
  15   3   0-36.4178 36.9826   4
 -15  -3   0 0.02845 55.4501   4
  16   3   0-38.7637 70.4949   6
  16   3   0 43.1227 56.0040   3
 -16   3   0-7.73323 46.3240   2
 -16  -3   0 130.062 98.3695   5
  16   3   0 13.5732 25.4487   4
  16   3   0-17.9511 26.4824   4
 -16   3   0 72.2177 70.8858   5
  16  -3   0 89.5656 69.6921   3
 -16  -3   0 60.3449 57.4606   4
  16   3   0-21.2033 54.2291   2
  16  -3   0 72.4202 55.8443   6
  17  -3   0 64.6790 53.5237   6
 -17   3   0-41.4315 59.7609   2
  17  -3   0-56.2620 64.3566   3
  17   3   0-102.747 97.1881   6
 -17   3   0-13.2281 65.1941   5
  17   3   0 84.1188 73.3744   2
  17   3   0 39.9436 73.3476   3
 -17  -3   0-9.22671 62.9786   4
 -17  -3   0-52.5655 94.8914   5
  18  -3   0 2091.11 173.192   3
 -18   3   0 2124.11 152.132   2
  18   3   0 1887.24 179.804   3
  18  -3   0 2059.31 159.344   6
  18   3   0 2034.47 206.340   6
 -18  -3   0 2237.15 233.289   5
 -18   3   0 1880.53 169.053   5
 -18  -3   0 1889.82 157.550   4
 -19  -3   0 105.010 105.597   5
  19   3   0 51.6284 88.6677   6
  19   3   0 60.8476 73.3146   3
  19  -3   0 106.436 71.0859   3
 -19  -3   0 146.323 89.2029   4
 -19   3   0 46.5661 55.6865   2
  19  -3   0 149.943 77.1542   6
 -19   3   0 5.36727 82.7226   5
 -20   3   0 6674.78 275.158   2
 -20  -3   0 6263.34 393.509   5
 -20  -3   0 6094.19 279.668   4
  20  -3   0 6501.17 312.421   3
  20   3   0 5830.44 354.062   6
 -20   3   0 6196.33 320.873   5
  20   3   0 6137.45 339.348   3
  20  -3   0 6109.74 280.451   6
  21   3   0-16.3845 93.0998   6
  21  -3   0 68.6609 73.7927   3
  21  -3   0 69.8865 66.4651   6
  21   3   0-0.83289 86.5638   3
 -21  -3   0 209.992 136.995   5
 -21   3   0 22.8944 61.7622   2
 -21  -3   0 107.569 84.4500   4
 -21   3   0 7.39039 89.5167   5
 -22   3   0 9872.10 420.728   5
  22   3   0 9865.71 472.966   6
  22  -3   0 10299.4 381.920   6
 -22  -3   0 10315.4 518.999   5
  22  -3   0 10777.4 417.745   3
  22   3   0 10435.9 461.861   3
 -22  -3   0 10073.4 362.489   4
 -22   3   0 11032.4 372.766   2
 -23   3   0 424.860 89.9867   2
  23  -3   0 683.766 127.740   6
 -23   3   0 548.263 142.130   5
 -23  -3   0 586.086 163.733   5
  23  -3   0 542.662 120.020   3
  23   3   0 494.885 137.112   3
  23   3   0 614.684 154.054   6
 -23  -3   0 361.635 97.6566   4
 -24   3   0 496.691 133.316   5
  24  -3   0 385.219 99.1814   6
 -24  -3   0 473.200 115.699   4
  24  -3   0 416.305 103.122   3
 -24   3   0 561.815 109.981   2
 -24  -3   0 269.902 120.486   5
 -25  -3   0-4.19261 113.203   5
 -25  -3   0 143.438 107.392   4
  25  -3   0 18.3550 69.1754   3
 -25   3   0-58.0488 69.5344   2
 -25   3   0-156.036 120.275   5
  25  -3   0-28.6035 75.9264   6
  26  -3   0 1086.70 153.605   6
  26  -3   0 964.878 150.828   3
 -26   3   0 1236.78 155.202   2
 -26   3   0 1042.78 187.978   5
 -26  -3   0 789.544 175.177   5
 -26  -3   0 1365.36 173.323   4
 -27  -3   0-178.828 120.232   4
 -27   3   0 44.1814 76.7545   2
  27  -3   0 210.574 115.456   6
 -27  -3   0-171.779 160.294   5
 -27   3   0-107.553 138.328   5
 -28  -3   0 2523.39 331.797   5
 -28   3   0 1863.03 258.287   5
 -28  -3   0 2040.31 219.859   4
  28   3   0 2115.56 262.347   3
  28  -3   0 1944.21 213.543   6
 -28   3   0 2195.04 204.548   2
  28   3   0 1776.05 254.175   6
 -29   3   0 155.006 114.372   2
 -29  -3   0 318.325 143.453   4
 -29  -3   0 766.904 218.780   5
  29   3   0-18.4103 149.325   6
  29  -3   0 458.980 143.347   6
  29   3   0 353.298 190.655   3
 -29   3   0 552.148 205.700   5
 -30   3   0 2986.74 319.783   5
  30   3   0 2755.07 293.687   3
 -30  -3   0 2604.13 243.756   4
 -30   3   0 2720.34 231.786   2
  30  -3   0 2800.05 251.452   6
  30   3   0 2753.32 305.011   6
 -30  -3   0 2611.04 339.571   5
  30  -3   0 2515.44 257.257   3
 -31  -3   0 698.827 182.043   4
 -31  -3   0 385.549 226.757   5
 -31   3   0 695.834 211.977   5
  31   3   0 504.826 219.823   6
  31  -3   0 319.311 150.649   3
  31   3   0 157.629 162.318   3
 -31   3   0 196.225 122.617   2
 -32   3   0 726.484 226.024   5
  32   3   0 417.593 193.634   3
  32   3   0 119.062 205.541   6
 -32  -3   0 114.075 139.907   4
  32  -3   0 140.328 123.314   3
 -32  -3   0 254.202 194.933   5
 -32   3   0 186.453 122.521   2
 -33   3   0 328.394 142.965   2
  33  -3   0 218.626 149.423   3
 -33  -3   0 342.287 181.324   4
 -33  -3   0-33.0582 185.762   5
 -33   3   0-245.718 220.431   5
  33   3   0 107.330 161.169   3
 -33  -3   0-131.263 158.085   2
  33   3   0 122.466 171.443   6
 -34   3   0 2538.77 339.233   5
 -34  -3   0 2294.45 331.143   5
 -34  -3   0 2629.83 306.806   2
  34   3   0 2072.89 296.154   6
 -34  -3   0 2513.80 283.845   4
 -34   3   0 2239.50 242.691   2
  34  -3   0 2443.58 274.763   3
  34   3   0 2227.37 301.404   3
  35   3   0 100.393 159.022   3
 -35   3   0-213.992 220.269   5
  35   3   0 72.9414 168.386   6
 -35  -3   0 198.975 146.963   2
  35  -3   0 264.737 156.266   6
 -35   3   0 87.5676 137.408   2
 -35  -3   0 47.8224 201.628   5
  35  -3   0 171.785 154.250   3
 -35  -3   0 166.230 173.518   4
  36   3   0 193.892 169.912   3
  36  -3   0 461.814 184.779   6
 -36  -3   0 169.407 185.738   4
 -36  -3   0 360.144 233.574   5
 -36   3   0 298.184 251.239   5
  36   3   0 111.696 169.982   6
 -36   3   0 177.379 173.368   2
  36  -3   0 348.475 169.739   3
 -36  -3   0 74.7104 181.196   2
 -37  -3   0-9.37016 226.184   5
  37   3   0 82.9769 163.248   3
  37  -3   0 122.830 148.403   3
 -37   3   0 215.805 274.592   5
  37  -3   0 67.3700 146.092   6
  37   3   0 266.437 219.670   6
 -37  -3   0 326.777 226.757   2
 -37   3   0 271.762 191.484   2
  38  -3   0 3055.95 330.297   3
  38   3   0 3252.91 364.784   3
  38   3   0 3006.00 363.239   6
 -38   3   0 3723.77 452.586   5
 -38   3   0 3427.50 319.000   2
 -38  -3   0 3507.37 379.604   2
 -38  -3   0 3557.00 467.655   5
  38  -3   0 2991.36 305.432   6
  39   3   0 162.100 184.307   3
  39  -3   0-5.51864 148.172   6
  39   3   0-81.9346 194.865   6
 -39  -3   0 231.985 284.267   5
 -39   3   0-257.087 196.061   2
  39  -3   0-29.9522 141.677   3
 -39  -3   0 10.4562 182.443   2
 -39   3   0-261.876 316.540   5
 -40   3   0 108.766 295.270   5
 -40  -3   0 76.3465 209.318   2
 -40   3   0 197.152 187.970   2
  40   3   0 535.704 239.922   3
  40  -3   0 226.822 189.514   3
 -40  -3   0 96.1236 263.428   5
  40   3   0 213.251 179.352   6
  40  -3   0 248.244 189.834   6
  41   3   0 161.149 207.726   6
 -41  -3   0 10.8697 194.299   2
  41   3   0 161.743 223.687   3
 -41   3   0-32.9600 190.187   2
  41  -3   0 1.01829 152.022   6
 -41  -3   0 52.5899 268.746   5
  41  -3   0-80.6840 181.067   3
 -41   3   0 177.248 315.585   5
 -42  -3   0 221.465 217.429   2
  42   3   0 68.1153 235.179   6
 -42  -3   0-247.821 325.822   5
 -42   3   0-378.946 262.015   2
 -42   3   0-644.696 398.864   5
  42  -3   0 24.0671 181.417   3
  42   3   0 62.5385 202.353   3
  43   3   0 412.243 231.418   3
 -43  -3   0 41.2598 304.388   5
  43  -3   0 302.131 215.691   3
 -43  -3   0 69.1984 237.000   2
  43   3   0-151.544 224.370   6
   0  -4   0 75563.2 628.604   5
   0  -4   0 75955.5 665.141   6
   0   4   0 80232.1 692.802   5
   0   4   0 78572.2 685.000   6
   0  -4   0 75715.3 643.106   2
   0  -4   0 75958.2 847.193   4
   0   4   0 76910.2 649.865   2
   0   4   0 71243.6 809.383   4
  -1   4   0 0.81236 31.0915   2
  -1  -4   0-61.0931 46.7641   5
  -1  -4   0 12.2708 34.3186   2
   1  -4   0-47.4907 35.2487   6
   1   4   0 25.1044 44.5188   6
   1  -4   0 3.87459 28.8928   2
   1   4   0 5.06617 58.5184   4
   1   4   0-27.6094 47.6958   5
   1   4   0-1.74656 31.6411   2
   1  -4   0 8.39499 52.2913   4
  -1  -4   0-31.4770 39.3574   6
  -1   4   0-18.9770 36.5743   6
  -1  -4   0-126.522 59.5181   4
   1  -4   0-22.5466 31.7780   5
  -1   4   0-48.5777 57.8906   4
  -1   4   0-73.6262 41.2948   5
  -2   4   0 212.730 40.0632   2
  -2  -4   0 100.170 48.1210   6
  -2   4   0 240.687 44.7758   6
   2  -4   0 190.003 34.8107   5
   2  -4   0 193.265 54.6556   4
  -2   4   0 139.195 66.7866   4
  -2  -4   0 296.161 63.0347   5
   2  -4   0 241.971 43.4250   6
   2   4   0 195.842 64.4096   5
   2   4   0 175.518 44.8735   2
   2   4   0 194.559 72.0303   4
  -2   4   0 224.430 41.9634   5
  -2  -4   0 254.126 67.4425   4
   2   4   0 138.937 49.2845   6
   2  -4   0 213.227 38.8681   2
  -2  -4   0 217.660 49.8153   2
   3   4   0 58.5097 49.1818   6
  -3  -4   0 20.4750 46.8873   6
   3  -4   0 66.0944 34.5807   2
  -3   4   0 11.0802 29.2351   6
   3   4   0 6.95574 35.9487   2
  -3  -4   0 21.4903 55.2408   4
   3   4   0 24.4168 58.6498   4
  -3   4   0 23.6914 53.5548   4
  -3  -4   0-61.3787 50.5065   5
  -3   4   0 57.7078 33.5291   2
  -3  -4   0 11.4160 43.6687   2
   3   4   0 0.37079 49.0587   5
   3  -4   0 85.8516 34.4699   6
  -4  -4   0 62.5750 58.0464   4
  -4   4   0 112.830 48.9771   4
  -4  -4   0 62.3918 58.6179   6
  -4  -4   0-7.34552 48.7892   2
   4  -4   0 170.747 36.2054   6
   4   4   0 184.843 76.1957   4
   4   4   0 19.2727 64.2156   5
   4   4   0 132.824 58.6432   6
  -4   4   0 147.189 35.4990   6
  -4   4   0 79.8135 31.2244   2
  -4  -4   0 193.946 68.5179   5
   4   4   0 125.781 51.3176   2
   4  -4   0 154.370 35.6323   2
   5  -4   0-3.98375 30.0311   2
   5   4   0-43.9076 59.5354   6
   5   4   0 19.4522 65.3566   4
  -5   4   0-15.5049 29.4609   6
   5   4   0 106.336 83.3555   5
   5   4   0-59.8960 47.0303   2
  -5   4   0-15.3074 28.8376   2
  -5   4   0-22.7991 37.2831   3
  -5  -4   0-52.8432 59.2394   4
  -5  -4   0-16.2054 60.7333   5
   6   4   0 16792.8 438.662   4
  -6   4   0 17814.5 253.710   6
  -6   4   0 17252.9 328.783   3
  -6   4   0 17227.3 251.235   6
   6   4   0 16693.8 388.834   2
  -6  -4   0 16964.1 440.974   5
  -6   4   0 17246.1 268.822   2
   6   4   0 16829.1 428.110   6
   6  -4   0 17751.0 276.392   2
   6  -4   0 17225.7 320.666   3
   6   4   0 17377.9 400.603   3
  -6  -4   0 16837.8 431.002   4
   7   4   0 56.2762 57.3782   2
  -7  -4   0 100.582 72.0377   4
   7   4   0 45.3592 58.5650   3
  -7  -4   0-95.9981 85.5946   5
  -7   4   0-37.2580 31.5807   6
  -7   4   0 55.9364 40.4819   2
   7  -4   0 27.3064 43.0599   3
   7   4   0-6.34354 72.0942   4
  -7   4   0-19.7217 44.3272   3
   7   4   0-250.816 80.0532   6
   7  -4   0 26.5646 35.1332   2
   8   4   0 29094.2 548.624   2
  -8   4   0 28825.4 357.902   2
   8   4   0 29327.5 548.362   3
   8  -4   0 29755.1 450.428   3
   8   4   0 29469.1 617.952   6
   8  -4   0 28978.3 380.672   2
  -8   4   0 29715.6 359.165   6
   8   4   0 28802.5 577.210   4
  -8  -4   0 29225.7 618.097   5
  -8  -4   0 29145.5 576.955   4
   9   4   0 7.12185 47.0290   3
   9  -4   0 26.5369 36.0007   2
   9  -4   0 21.0408 33.2326   6
  -9  -4   0 96.4731 84.0536   5
  -9   4   0-31.6991 37.9121   6
   9  -4   0-36.0649 50.1572   3
  -9   4   0 27.6401 24.4190   5
  -9  -4   0-88.4129 71.3729   4
   9   4   0-8.17819 51.8174   2
   9   4   0-88.5272 85.2684   6
  -9   4   0 30.4341 35.6404   2
  10  -4   0 18197.1 332.502   2
 -10   4   0 17771.3 315.797   6
 -10  -4   0 17497.4 512.532   5
  10  -4   0 17732.4 286.474   6
 -10   4   0 17584.5 298.346   2
  10   4   0 17829.7 454.399   3
 -10  -4   0 18092.4 461.264   4
  10   4   0 19591.3 464.400   4
 -10   4   0 16766.3 284.123   5
  10   4   0 17083.0 444.609   2
  10   4   0 17392.8 496.691   6
 -10   4   0 17053.0 245.863   5
  10  -4   0 18871.6 391.725   3
  11   4   0 112.427 87.8465   4
  11  -4   0 98.7899 47.3119   6
  11   4   0 137.063 77.3705   3
  11  -4   0 111.551 53.1526   2
 -11  -4   0 22.0916 62.2436   4
  11   4   0 119.291 72.8060   2
 -11  -4   0 98.6232 88.5234   5
 -11   4   0 16.0044 43.6763   5
 -11   4   0 117.248 55.2179   6
 -11   4   0 28.0313 39.3042   5
 -11   4   0 106.900 42.7841   2
  11   4   0 77.1961 75.0001   6
  11  -4   0 108.008 55.8876   3
 -12   4   0 10043.6 261.075   5
  12  -4   0 11197.7 291.952   2
  12  -4   0 10895.6 320.338   3
 -12  -4   0 10324.2 419.624   5
  12   4   0 9024.94 310.620   4
 -12   4   0 10506.0 253.251   2
  12   4   0 10261.9 368.375   2
  12  -4   0 10758.8 255.503   6
  12   4   0 10548.1 377.345   3
 -12  -4   0 10759.4 365.197   4
 -12   4   0 10297.1 239.115   5
 -12   4   0 9945.94 270.567   6
  12   4   0 10001.5 395.077   6
  13   4   0-83.8442 75.2689   6
  13   4   0 26.1645 64.5301   3
  13  -4   0-39.8570 43.8830   6
  13  -4   0-16.2432 49.2970   3
  13   4   0 80.0506 85.0463   4
 -13   4   0-16.4075 35.6882   2
 -13  -4   0 28.6967 71.3967   5
 -13   4   0-25.5295 57.8276   5
  13   4   0-5.00172 69.5902   2
 -13   4   0 49.0456 54.8306   5
 -13  -4   0-88.8329 81.8689   4
 -13   4   0 11.8371 51.0453   6
 -14   4   0 2934.92 169.537   5
 -14  -4   0 2721.24 240.588   5
 -14   4   0 2952.82 145.363   2
  14  -4   0 3168.66 188.901   3
 -14  -4   0 3009.35 205.263   4
  14   4   0 2778.48 206.332   3
  14   4   0 2636.70 223.425   6
  14   4   0 2847.92 178.668   4
 -14   4   0 2011.83 153.729   6
  14   4   0 2786.29 208.445   2
  14  -4   0 3070.35 151.165   6
 -14   4   0 2926.98 159.576   5
  15  -4   0-44.9573 51.0273   3
 -15   4   0 50.8593 48.1686   2
 -15   4   0 17.7203 59.1279   5
  15   4   0 36.5413 68.4877   6
  15   4   0 47.2691 66.6587   2
 -15   4   0 125.695 79.2399   5
  15  -4   0 42.4758 41.4226   6
  15   4   0-225.180 100.454   4
  15   4   0-24.7903 53.3536   3
 -15  -4   0 175.662 84.8858   4
 -15  -4   0 75.3745 89.0903   5
 -16   4   0-162.978 105.050   5
 -16   4   0 17.5425 66.2473   5
  16  -4   0 126.619 61.1693   6
 -16  -4   0 92.7904 102.821   5
  16   4   0-29.4443 76.0710   4
  16   4   0 80.7948 62.7147   3
  16   4   0 222.157 106.791   6
 -16  -4   0 132.754 72.1798   4
  16   4   0 57.5047 66.1522   2
 -16   4   0 42.5858 41.6884   2
  16  -4   0 82.5381 69.7067   3
  17   4   0 102.286 62.1012   4
  17   4   0 31.3214 87.5675   6
  17  -4   0 17.3942 54.9718   3
  17   4   0 60.4004 64.6514   3
 -17   4   0 108.423 53.3750   2
 -17  -4   0 137.256 98.8379   5
  17   4   0 98.2845 77.5715   2
 -17   4   0 22.2240 73.0148   5
  17  -4   0 85.4885 54.4175   6
 -17  -4   0 66.9906 67.5674   4
 -18   4   0 59.2934 54.0396   2
  18   4   0-4.13848 48.5874   4
 -18   4   0 21.7264 76.9803   5
  18   4   0 184.996 101.895   6
  18   4   0 18.4767 65.5961   2
 -18  -4   0 23.9136 72.4263   4
  18  -4   0 190.833 66.9585   6
  18  -4   0 155.517 74.9590   3
 -18  -4   0-66.4428 107.955   5
  18   4   0 0.11556 72.1480   3
  19   4   0 107.679 81.5064   3
  19   4   0 31.0229 72.0070   2
 -19  -4   0 50.5147 131.575   5
  19  -4   0-39.3409 46.8407   6
  19   4   0 51.9213 40.4126   4
 -19   4   0 42.1652 63.5960   2
  19  -4   0 54.6711 65.4126   3
 -19   4   0-130.117 85.3558   5
  19   4   0-85.5767 102.573   6
 -19  -4   0-181.032 99.5717   4
  19   4   0-14.0614 32.1565   4
  20   4   0 732.603 132.500   2
 -20  -4   0 883.450 131.196   4
 -20  -4   0 789.927 170.087   5
  20   4   0 797.349 139.141   3
  20   4   0 762.795 153.614   6
 -20   4   0 936.021 115.141   2
 -20   4   0 825.162 130.740   5
  20  -4   0 943.201 126.142   3
  20   4   0 582.261 51.3423   4
  20   4   0 687.327 60.6100   4
  20  -4   0 775.523 101.774   6
 -21  -4   0 276.890 112.646   4
  21   4   0 87.3605 103.984   6
  21  -4   0 28.8683 56.8965   6
 -21   4   0-13.0507 58.4272   2
  21   4   0 53.1539 81.2684   3
  21  -4   0 86.4933 75.5385   3
 -21   4   0 94.6407 92.2261   5
 -21  -4   0 40.6944 100.526   5
  22   4   0 194.061 106.461   6
 -22   4   0 389.610 82.6031   2
  22  -4   0 290.452 79.6718   6
 -22  -4   0 191.572 80.3615   4
  22  -4   0 315.411 96.0748   3
 -22   4   0 360.347 124.123   5
 -22  -4   0 148.641 102.948   5
  22   4   0 168.440 88.5807   3
  23  -4   0 99.5182 83.0596   3
 -23  -4   0-12.7187 88.0619   4
 -23  -4   0 259.510 143.499   5
  23  -4   0 136.394 62.7918   6
 -23   4   0 57.0390 60.3116   2
 -23   4   0 34.6852 92.8239   5
 -24   4   0 50.6251 78.2532   2
 -24  -4   0 79.9668 120.225   5
 -24   4   0 246.690 131.991   5
  24  -4   0 16.3326 67.1130   3
 -24  -4   0 76.1117 90.2073   4
  24  -4   0-31.9983 55.6642   6
 -25  -4   0 89.2696 96.8687   4
 -25   4   0 219.380 134.724   5
 -25   4   0 185.346 86.0441   2
  25  -4   0 124.766 78.0745   6
 -25  -4   0 115.201 138.228   5
  25  -4   0 194.676 96.4228   3
 -26  -4   0 1271.27 238.250   5
 -26  -4   0 1095.12 164.142   4
  26  -4   0 1256.68 152.069   6
 -26   4   0 1659.00 174.883   2
 -26   4   0 1584.56 224.151   5
 -27  -4   0 250.582 133.925   4
  27   4   0-7.68463 123.573   3
  27   4   0 162.347 146.270   6
  27  -4   0 99.8202 84.8687   6
 -27   4   0 120.879 126.007   5
 -27   4   0 167.753 91.3873   2
 -27  -4   0 198.931 183.360   5
 -28   4   0 1598.39 174.826   2
  28  -4   0 1229.51 163.249   6
  28   4   0 1445.24 241.691   6
 -28  -4   0 1389.18 187.951   4
 -28   4   0 1299.05 217.179   5
  28   4   0 1481.17 225.553   3
 -28  -4   0 1601.80 276.307   5
 -29   4   0 246.044 175.665   5
 -29   4   0-0.15514 86.4494   2
  29   4   0 176.150 179.504   6
  29  -4   0-65.5617 86.7653   6
  29   4   0-0.39390 130.535   3
 -29  -4   0 41.3752 125.525   4
 -29  -4   0-127.805 164.549   5
  30  -4   0 49.0389 104.133   3
  30   4   0 28.1439 153.296   6
  30   4   0-189.579 150.411   3
 -30   4   0 36.5896 85.8829   2
 -30   4   0 143.968 138.770   5
 -30  -4   0-5.07970 187.511   5
 -30  -4   0-36.8649 107.844   4
  30  -4   0-27.5705 75.7618   6
 -31   4   0 158.617 154.342   5
  31   4   0 75.5101 174.198   6
  31   4   0 47.1507 171.048   3
  31  -4   0-80.2665 107.120   3
 -31   4   0-16.9009 91.7694   2
  31  -4   0 42.9851 96.4350   6
 -31  -4   0 59.4792 186.073   5
 -31  -4   0 228.401 132.130   4
 -32  -4   0 452.353 239.033   5
  32  -4   0 434.545 154.240   3
 -32   4   0 501.808 136.203   2
 -32  -4   0 452.295 178.998   4
  32   4   0 434.579 193.404   3
 -32   4   0 603.632 200.915   5
  32   4   0 281.137 173.232   6
 -33  -4   0 76.1417 151.899   4
 -33   4   0 25.8125 114.999   2
  33   4   0 165.346 189.499   6
  33   4   0-50.8217 166.064   3
 -33   4   0 259.799 203.358   5
  33  -4   0 222.340 153.110   3
 -33  -4   0 89.0652 214.375   5
  34   4   0 4109.02 406.060   6
 -34   4   0 4669.42 419.197   5
 -34  -4   0 4011.75 358.541   4
  34  -4   0 4640.38 363.895   3
  34   4   0 4287.56 387.291   3
 -34   4   0 5154.03 340.392   2
 -34  -4   0 4617.62 472.548   5
 -35   4   0-135.944 234.094   5
 -35  -4   0 158.396 182.719   4
 -35   4   0 189.492 160.607   2
 -35  -4   0 323.722 232.354   5
  35  -4   0-6.03303 129.101   3
  35   4   0 63.9073 209.864   6
  35   4   0 21.1738 176.099   3
  36   4   0 1596.80 283.228   6
 -36  -4   0 1533.41 315.524   5
 -36   4   0 2017.17 258.089   2
  36  -4   0 1585.41 245.081   3
 -36   4   0 1556.44 319.406   5
  36   4   0 1586.64 276.759   3
 -36  -4   0 1456.15 263.694   2
  36  -4   0 1481.29 222.827   6
 -36  -4   0 1153.26 247.037   4
 -37  -4   0-383.491 264.292   5
  37   4   0 15.4585 168.403   3
 -37  -4   0 251.808 188.436   2
  37   4   0 15.1298 183.311   6
  37  -4   0 140.978 171.196   3
 -37  -4   0-649.311 255.615   4
 -37   4   0 139.163 176.704   2
  37  -4   0 100.129 139.056   6
 -37   4   0 332.892 296.893   5
  38  -4   0 7298.11 483.945   3
  38  -4   0 7681.94 449.775   6
  38   4   0 7197.53 545.870   6
 -38   4   0 8687.51 617.619   5
 -38  -4   0 8607.74 575.252   2
  38   4   0 7182.40 513.199   3
 -38   4   0 8520.46 465.323   2
 -38  -4   0 7763.62 626.056   5
 -39   4   0 242.683 199.797   2
 -39  -4   0 415.499 241.724   2
 -39  -4   0 180.975 270.897   5
  39  -4   0 387.498 188.573   6
  39  -4   0 453.036 201.335   3
  39   4   0 140.636 202.436   6
  39   4   0 271.562 206.825   3
 -39   4   0-84.9399 282.727   5
 -40  -4   0-14.2938 264.083   5
 -40  -4   0 431.113 240.612   2
 -40   4   0-697.275 379.193   5
  40   4   0 248.325 194.393   3
  40  -4   0 200.654 168.148   3
  40  -4   0-433.911 226.319   6
 -40   4   0-230.181 213.947   2
  40   4   0 484.374 231.440   6
  41   4   0-499.136 264.483   6
  41  -4   0-20.7520 160.110   3
  41   4   0 1.05549 185.180   3
 -41  -4   0-167.266 209.419   2
 -41  -4   0 51.0231 276.809   5
  42  -4   0 102.723 169.698   3
  42   4   0 158.578 218.898   6
  42   4   0 215.488 206.065   3
 -42  -4   0 204.395 307.495   5
 -42  -4   0 76.9659 222.050   2
 -43  -4   0-136.687 239.693   2
  43   4   0-516.969 281.961   6
 -43  -4   0 154.574 314.381   5
  43   4   0-218.700 203.447   3
  43  -4   0 305.311 191.854   3
   0  -5   0 128.804 56.3728   5
   0   5   0 164.398 53.0707   2
   0  -5   0 79.5452 53.0132   6
   0   5   0 121.096 53.5419   6
   0   5   0 230.916 75.4372   5
   0   5   0 55.2230 77.9881   4
   0  -5   0 17.1363 79.0059   4
   0  -5   0 117.457 55.6773   2
  -1  -5   0 140.565 61.5315   5
  -1  -5   0 101.781 60.5635   2
   1  -5   0 89.2898 48.7578   2
   1  -5   0 64.3400 70.6533   4
  -1   5   0 115.977 48.1323   6
   1   5   0 146.087 59.3645   6
  -1  -5   0 134.784 88.1451   4
  -1   5   0 173.097 64.6537   5
  -1  -5   0 112.846 60.5303   6
   1   5   0 96.7297 79.3921   4
   1   5   0 75.8437 64.9062   5
   1   5   0 158.746 53.0752   2
   1  -5   0 116.191 51.5655   5
  -1   5   0 130.987 72.0478   4
   1  -5   0 138.130 52.1553   6
  -1   5   0 144.930 49.9406   2
  -2  -5   0 267530. 1775.34   4
  -2   5   0 268630. 1234.13   5
  -2   5   0 245283. 1681.56   4
  -2   5   0 260188. 1270.57   6
  -2  -5   0 250240. 1443.10   5
   2   5   0 274877. 1648.39   5
   2   5   0 260270. 1519.30   6
   2  -5   0 256300. 1562.58   4
   2  -5   0 249167. 1207.85   2
   2  -5   0 252989. 1203.91   6
   2   5   0 250479. 1396.36   2
  -2  -5   0 254695. 1506.68   6
  -2   5   0 248962. 1220.05   2
   2  -5   0 256620. 1098.52   5
   3  -5   0 610.117 69.5571   6
   3   5   0 447.189 79.9232   2
   3  -5   0 598.456 93.4973   4
   3   5   0 344.601 86.1966   5
  -3   5   0 600.837 73.9432   6
  -3  -5   0 408.768 83.4195   5
   3  -5   0 467.538 62.7430   2
   3  -5   0 583.405 60.7472   5
   3   5   0 205.411 102.815   4
   3   5   0 521.818 90.6803   6
  -3  -5   0 631.662 117.068   4
  -3   5   0 526.001 67.8654   2
  -3   5   0 440.074 62.2383   5
  -3   5   0 598.452 109.435   4
   4   5   0 29037.1 512.063   2
  -4   5   0 27167.4 534.708   4
   4  -5   0 29229.4 298.311   5
  -4   5   0 28688.0 386.409   6
   4   5   0 28743.5 546.890   6
  -4  -5   0 28267.7 592.159   4
  -4   5   0 28250.5 330.179   5
  -4   5   0 28689.4 393.199   2
   4  -5   0 29559.3 376.081   6
  -4  -5   0 28557.9 540.278   5
   4  -5   0 28480.2 390.373   2
   5  -5   0 12.1516 36.1031   6
  -5  -5   0-97.2749 77.3499   4
  -5   5   0-42.5974 72.7986   4
   5   5   0 40.8227 53.0590   2
  -5   5   0 30.5331 42.5623   6
   5   5   0 51.3655 60.5755   6
  -5   5   0 29.6311 37.1576   2
   5  -5   0 7.07515 37.4795   2
  -6  -5   0 68771.9 917.698   5
  -6  -5   0 67402.8 928.873   4
  -6   5   0 66393.6 549.313   6
   6  -5   0 66930.2 590.111   2
   6   5   0 65264.7 878.068   6
   6   5   0 67659.1 838.489   2
  -6   5   0 63107.1 735.616   4
  -6   5   0 65433.9 584.916   2
   7   5   0 42.0968 59.5329   2
  -7   5   0 5.71016 34.8639   6
   7  -5   0 16.0510 36.2261   2
   7   5   0-87.0215 75.1537   6
  -7  -5   0-6.03354 67.3675   5
  -7  -5   0-70.8524 76.0272   4
  -7   5   0-0.29372 34.1177   2
   7   5   0-38.4395 50.7535   3
   8   5   0 25455.8 547.975   3
   8  -5   0 25665.8 443.401   3
  -8  -5   0 24441.0 590.648   5
  -8   5   0 24613.9 358.204   2
  -8   5   0 25378.8 344.195   6
  -8  -5   0 24846.5 585.033   4
   8   5   0 25007.2 538.221   2
   8  -5   0 25071.8 372.042   2
   8   5   0 25308.6 597.106   6
  -8   5   0 26004.9 347.592   6
  -9  -5   0-20.2878 83.9934   4
  -9  -5   0 104.339 87.0085   5
   9  -5   0 27.2170 37.8825   2
   9  -5   0 22.3676 43.5843   3
   9   5   0-46.5962 91.7346   6
  -9   5   0 34.6544 37.7581   6
   9   5   0 84.1089 56.8917   3
   9   5   0 4.38770 63.1409   2
  -9   5   0 23.0423 34.6663   2
  10   5   0 70550.2 1062.44   6
  10  -5   0 67527.4 651.436   2
  10   5   0 67927.1 931.521   2
 -10   5   0 71067.2 632.475   6
  10   5   0 69641.5 941.608   3
 -10  -5   0 72228.7 1013.14   4
  10  -5   0 69691.4 772.955   3
 -10   5   0 68905.5 621.345   2
 -10  -5   0 70694.0 1075.07   5
 -11   5   0 10.8454 31.1191   2
  11   5   0-69.7904 82.0040   6
  11  -5   0 60.9294 52.2082   3
 -11  -5   0-55.6565 78.2784   4
  11  -5   0-34.3814 42.3357   6
  11   5   0-15.4007 50.3333   3
 -11   5   0-38.8962 45.1744   6
 -11   5   0 23.5252 28.3283   5
 -11  -5   0-34.0245 71.9250   5
  11   5   0 43.7814 58.2703   2
 -11   5   0-52.2496 42.1539   5
  11  -5   0 38.5190 50.1865   2
 -12   5   0 7692.47 233.004   6
  12  -5   0 8232.83 219.775   6
  12   5   0 7762.76 334.564   3
  12   5   0 7765.02 363.938   6
 -12  -5   0 7883.66 384.373   5
 -12  -5   0 8036.08 349.251   4
 -12   5   0 7680.03 169.188   5
  12   5   0 7710.37 331.292   2
 -12   5   0 8470.02 232.588   2
  12  -5   0 8091.43 279.823   3
 -12   5   0 7481.96 205.870   5
  13  -5   0 25.0750 54.1025   3
 -13   5   0-44.4527 40.1332   2
  13   5   0 0.96448 70.9435   6
  13   5   0 28.6694 62.1347   2
  13  -5   0-6.93960 34.0981   6
 -13   5   0-95.9543 65.2819   6
 -13  -5   0 25.3774 72.4815   5
  13   5   0 58.1455 66.5720   3
 -13  -5   0 19.5458 66.3897   4
 -13   5   0 0.05600 45.3804   5
 -13   5   0-39.0411 42.5278   5
  14  -5   0 397.470 81.2478   3
 -14   5   0 429.613 66.5126   2
 -14  -5   0 372.764 98.1621   4
  14   5   0 498.514 108.638   3
 -14  -5   0 461.107 124.576   5
  14   5   0 379.652 90.6355   2
  14   5   0 372.400 106.875   6
  14  -5   0 265.692 49.9592   6
 -14   5   0 451.499 69.2222   5
 -14   5   0 179.340 68.1754   6
 -14   5   0 509.587 84.7398   5
  15  -5   0 48.2219 61.2044   3
  15   5   0 91.5596 90.8580   6
  15  -5   0 101.525 47.1975   6
  15   5   0 164.609 79.6142   2
  15   5   0-21.1689 61.0264   3
 -15   5   0 99.6016 83.6331   5
 -15   5   0 45.3311 48.3795   2
 -15  -5   0 252.826 101.845   4
 -15   5   0 87.9579 53.2581   5
 -15  -5   0 110.592 79.8674   5
  16   5   0 215.909 99.5276   3
 -16   5   0 44.6440 42.1594   2
  16  -5   0 38.0486 53.0000   3
 -16  -5   0 65.0469 76.7173   4
  16  -5   0 81.7886 40.5205   6
  16   5   0 14.1045 68.1511   2
 -16   5   0 131.468 67.1371   5
 -16  -5   0 73.6080 86.3113   5
 -16   5   0 174.213 78.2921   5
  16   5   0 34.5622 82.4628   6
  17  -5   0 43.8222 43.0551   6
 -17  -5   0 122.302 81.0540   4
 -17   5   0-121.390 86.4280   5
 -17   5   0 5.49731 52.7669   2
  17   5   0 46.2355 89.0877   6
  17   5   0 80.4180 83.8408   2
 -17  -5   0 106.774 97.5930   5
 -17   5   0-61.4564 94.3267   5
  17  -5   0-36.1342 73.8546   3
  17   5   0-42.9922 79.5173   3
  18   5   0 24632.3 723.979   6
 -18   5   0 26482.6 544.393   5
  18   5   0 24999.1 663.677   2
 -18   5   0 26909.0 493.270   2
  18  -5   0 26081.2 482.642   6
  18   5   0 26110.9 691.924   3
  18  -5   0 27434.7 609.404   3
 -18  -5   0 25851.5 795.699   5
 -18  -5   0 25552.1 651.511   4
  19   5   0 23.1891 73.7142   3
  19  -5   0 151.380 74.7094   3
 -19  -5   0-37.8845 107.369   5
  19  -5   0 1.08634 54.3481   6
 -19  -5   0 162.578 103.537   4
  19   5   0 182.045 97.1210   2
 -19   5   0 86.1948 51.9825   2
 -19   5   0 154.848 86.5755   5
  19   5   0-10.4133 90.7234   6
 -20  -5   0 1540.82 181.684   4
  20   5   0 1472.58 181.436   2
  20  -5   0 1439.11 155.134   3
 -20   5   0 1417.57 129.448   2
 -20  -5   0 1186.46 194.366   5
  20  -5   0 1451.38 131.477   6
 -20   5   0 1425.88 155.191   5
  20   5   0 1310.44 179.937   3
  20   5   0 1200.86 189.086   6
 -21   5   0-61.9551 105.486   5
  21  -5   0 9.83194 64.2488   6
 -21  -5   0-128.001 117.689   5
 -21   5   0-51.7859 61.5394   2
  21   5   0-38.9242 108.191   3
  21  -5   0 23.6079 76.7277   3
  21   5   0-137.709 101.187   2
 -21  -5   0-204.523 115.523   4
 -22   5   0 46588.9 843.626   5
  22   5   0 45481.8 510.901   4
  22   5   0 43853.5 940.540   2
  22  -5   0 47737.1 880.908   3
 -22  -5   0 45051.6 904.828   4
  22  -5   0 46890.1 742.407   6
 -22  -5   0 46809.2 1146.42   5
  22   5   0 46510.0 571.877   4
 -22   5   0 47540.6 733.864   2
  23   5   0 74.8461 35.9310   4
 -23   5   0 42.4398 66.1608   2
  23  -5   0-63.7512 70.1378   6
 -23  -5   0 18.8452 121.503   5
 -23  -5   0 28.8367 95.0604   4
  23   5   0 59.3165 34.9921   4
 -23   5   0 215.070 114.991   5
  23  -5   0 34.3663 77.1083   3
 -24  -5   0 5682.50 430.127   5
 -24   5   0 6461.96 348.004   5
  24  -5   0 6002.11 286.701   6
  24  -5   0 6180.91 336.747   3
 -24  -5   0 6079.10 349.723   4
 -24   5   0 6734.52 295.901   2
 -25  -5   0 384.334 128.557   4
  25   5   0 107.174 145.400   6
 -25   5   0 166.799 112.778   5
  25  -5   0 102.738 73.7965   6
 -25   5   0 110.250 80.4126   2
 -25  -5   0 98.6574 130.022   5
  25  -5   0 148.957 88.0512   3
  26  -5   0 9874.62 384.438   6
  26   5   0 9153.46 520.963   6
 -26   5   0 10544.1 474.301   5
  26   5   0 9603.37 499.209   3
 -26  -5   0 10337.2 587.220   5
 -26   5   0 10450.3 388.205   2
 -26  -5   0 9186.85 435.139   4
  27   5   0 36.5551 119.849   3
 -27   5   0-2.85816 85.8491   2
 -27   5   0 280.322 169.831   5
 -27  -5   0-105.925 114.824   4
  27  -5   0 135.412 86.5176   6
 -27  -5   0 25.9647 150.921   5
  27   5   0-20.2080 153.634   6
 -28  -5   0-90.8252 154.434   5
 -28  -5   0 343.139 159.595   4
 -28   5   0-15.6759 141.640   5
 -28   5   0-99.0472 98.1031   2
  28   5   0 89.9402 142.073   3
  28   5   0-6.66695 152.897   6
  28  -5   0 30.5689 71.1672   6
 -29  -5   0 206.258 200.240   5
  29   5   0 142.457 167.967   6
  29  -5   0 71.1336 89.3012   6
 -29  -5   0 67.8410 128.573   4
 -29   5   0-99.4046 145.023   5
  29   5   0-26.1959 150.318   3
 -29   5   0-71.1446 97.2701   2
 -30   5   0 340.583 180.346   5
  30  -5   0 29.0724 80.9902   6
  30   5   0 77.1628 166.765   6
 -30   5   0 68.9226 96.5856   2
 -30  -5   0 401.345 170.251   4
  30  -5   0 179.391 113.387   3
 -30  -5   0 254.532 195.714   5
  30   5   0 59.9476 150.463   3
 -31  -5   0-74.4201 144.056   4
 -31   5   0-44.5796 91.3189   2
 -31   5   0 343.934 206.639   5
 -31  -5   0 149.510 188.332   5
  31  -5   0 73.6401 112.553   3
  31   5   0-21.5731 148.747   3
  31   5   0-136.202 171.037   6
  31  -5   0 177.843 117.524   6
  32  -5   0 412.634 121.322   6
  32  -5   0 389.272 143.796   3
 -32  -5   0 376.044 187.347   4
 -32  -5   0 533.100 233.545   5
 -32   5   0 641.787 218.927   5
 -32   5   0 586.559 144.115   2
  32   5   0 265.588 164.792   3
  32   5   0 95.0152 189.799   6
  33  -5   0-160.002 130.923   3
  33   5   0-48.4942 172.655   3
  33   5   0 227.636 216.477   6
 -33   5   0-179.478 233.127   5
 -33  -5   0-60.6092 219.881   5
 -33  -5   0 458.149 221.668   4
 -33   5   0 96.1756 113.239   2
  34   5   0 262.354 222.815   6
  34  -5   0 34.5751 117.808   3
 -34   5   0 105.859 215.579   5
 -34  -5   0 311.720 210.758   4
 -34  -5   0 577.080 268.426   5
 -34   5   0 145.395 135.064   2
  34   5   0 214.378 214.997   3
  35   5   0-12.5127 205.328   6
  35   5   0 198.396 231.167   3
 -35  -5   0-320.592 243.919   4
 -35  -5   0 114.581 244.786   5
 -35   5   0-306.843 144.654   2
 -35   5   0 203.994 227.991   5
  35  -5   0 42.9477 143.276   3
 -36  -5   0 7278.90 601.495   5
  36   5   0 6685.12 502.312   3
  36  -5   0 7303.48 467.160   3
 -36   5   0 8010.94 424.114   2
 -36   5   0 7983.77 540.908   5
  36   5   0 6447.71 514.238   6
 -36  -5   0 7519.87 503.136   4
  37   5   0 58.9500 167.699   3
 -37   5   0 134.332 172.233   2
 -37  -5   0-199.432 260.631   4
 -37  -5   0 235.094 220.146   5
  37   5   0-122.289 188.644   6
 -37   5   0-690.397 304.249   5
  37  -5   0-3.69688 137.882   3
  37  -5   0 129.573 157.318   6
 -38  -5   0 2329.77 360.709   4
  38  -5   0 1939.71 272.835   3
 -38   5   0 1782.26 364.899   5
  38   5   0 1724.80 289.457   3
  38  -5   0 1570.24 237.551   6
 -38  -5   0 1744.07 362.685   5
  38   5   0 1454.03 281.176   6
 -38   5   0 1866.96 256.979   2
  39  -5   0 8.33325 142.845   3
 -39  -5   0 218.211 245.209   2
  39   5   0 84.2383 218.781   6
 -39  -5   0-110.116 247.026   5
  39   5   0-165.118 186.701   3
 -39   5   0-58.4179 179.571   2
  40  -5   0 3355.33 345.312   3
 -40  -5   0 4030.16 516.910   5
  40   5   0 3513.86 422.118   6
  40   5   0 2975.54 382.967   3
 -40  -5   0 3675.29 424.744   2
  41  -5   0 109.593 150.051   3
 -41  -5   0-75.1593 266.122   5
  41   5   0 144.926 203.319   3
 -41  -5   0 134.086 233.914   2
  41   5   0 32.9276 213.746   6
  42  -5   0 635.535 229.053   3
 -42  -5   0 902.889 296.427   2
 -42  -5   0 442.713 300.863   5
  42   5   0 516.637 239.483   3
  42   5   0 452.959 257.786   6
  43   5   0 271.038 234.528   3
  43  -5   0-39.4150 162.395   3
 -43  -5   0 294.657 330.142   5
 -43  -5   0-12.2399 243.659   2
  43   5   0 405.511 259.440   6
   0   6   0 106577. 950.195   2
   0   6   0 106251. 982.281   6
   0  -6   0 112974. 1267.73   4
   0   6   0 113274. 1064.20   5
   0  -6   0 103354. 904.142   5
  -1  -6   0-39.5338 94.0345   4
   1  -6   0-64.6740 61.3499   5
  -1   6   0-2.68965 43.7757   2
   1  -6   0-60.0792 83.2178   4
  -1   6   0 14.6031 50.1298   6
   1   6   0-4.93642 46.8388   2
   1   6   0-222.939 110.292   5
  -1  -6   0-128.221 80.5827   5
   1  -6   0-11.5741 59.7713   6
   1   6   0-123.221 69.8555   6
  -1   6   0-14.9704 65.5780   5
  -2   6   0 8766.13 263.504   6
   2  -6   0 8008.34 221.757   5
   2  -6   0 7717.41 241.552   6
   2   6   0 9381.66 295.297   2
  -2  -6   0 8884.76 364.147   4
  -2   6   0 9183.16 265.868   5
  -2   6   0 9159.87 261.528   2
  -2  -6   0 8808.58 294.875   5
   2   6   0 9106.25 309.844   6
   2  -6   0 8416.66 317.764   4
   3  -6   0 119.987 66.7056   4
  -3   6   0-12.8891 96.8796   4
  -3   6   0 108.589 48.9193   2
  -3   6   0 157.525 62.4294   5
   3   6   0 99.5067 64.8943   6
  -3  -6   0 43.9785 61.1732   5
  -3   6   0 89.7625 46.2192   6
   3  -6   0 9.13337 50.4982   6
   3  -6   0 121.425 49.3845   5
  -3  -6   0 135.841 82.2204   4
   3   6   0 111.693 52.3612   2
  -4   6   0 6542.44 213.592   2
   4  -6   0 6240.60 201.457   6
  -4  -6   0 6111.50 270.696   5
   4  -6   0 6535.78 169.935   5
  -4   6   0 6184.08 188.181   5
   4   6   0 6238.19 278.132   6
  -4   6   0 5217.17 283.080   4
   4   6   0 6233.29 256.133   2
  -4  -6   0 5847.06 296.122   4
  -4   6   0 6328.57 210.290   6
  -5  -6   0-16.1399 68.9022   4
  -5   6   0 37.0953 43.5879   2
   5  -6   0 59.1842 53.4458   2
  -5   6   0-22.3644 46.9375   6
  -5   6   0-38.3570 42.6450   5
  -5   6   0-0.16188 80.8968   4
   5   6   0 18.5827 47.5120   2
   5   6   0-167.603 71.3587   6
  -5  -6   0-203.789 77.6333   5
   5  -6   0-17.6055 42.5113   6
   5  -6   0 15.0424 31.9591   5
  -6   6   0 6106.80 279.657   4
   6   6   0 6668.11 304.624   6
   6  -6   0 7135.62 203.593   6
  -6   6   0 6478.65 161.275   5
   6  -6   0 6648.81 134.304   5
  -6  -6   0 6729.16 324.593   4
   6   6   0 6933.45 291.295   2
  -6  -6   0 6710.85 300.561   5
  -6   6   0 6951.84 211.008   2
  -6   6   0 6793.10 201.729   6
  -7   6   0 13.2926 37.4347   2
  -7  -6   0-13.4734 73.8002   5
  -7   6   0-31.4786 77.9258   4
   7   6   0 6.50621 63.4191   6
  -7   6   0-41.7458 44.0190   6
   7   6   0-11.0172 55.6682   2
   7  -6   0 15.5841 55.6750   2
  -7  -6   0 54.9874 80.2079   4
   8   6   0 39672.7 775.101   6
  -8  -6   0 39165.7 768.019   5
  -8   6   0 36256.1 616.263   4
   8   6   0 38694.2 704.218   2
  -8  -6   0 38887.0 779.147   4
  -8   6   0 39193.9 457.531   6
  -8   6   0 38428.1 488.133   2
  -9   6   0 1.30406 39.5828   6
   9   6   0 0.45851 57.1393   3
  -9   6   0-13.1293 35.6095   6
   9   6   0 63.4493 68.8049   6
  -9   6   0-7.47147 31.6426   2
  -9  -6   0 87.6674 77.1704   5
  -9  -6   0-2.13938 74.7713   4
   9   6   0-8.79411 63.7413   2
 -10  -6   0 7273.60 351.267   4
 -10   6   0 7262.39 204.528   6
  10   6   0 7246.79 365.158   6
 -10   6   0 7513.45 217.031   6
 -10   6   0 7297.84 215.886   2
  10   6   0 7110.86 321.612   2
  10   6   0 7409.45 328.317   3
  10  -6   0 7413.59 267.250   3
 -10  -6   0 6968.41 349.358   5
  11  -6   0 24.9819 44.2007   3
 -11   6   0-42.0891 49.3971   6
  11   6   0-28.0628 78.1643   6
 -11   6   0 29.3654 33.2274   2
 -11  -6   0-66.2845 79.9921   4
 -11  -6   0-72.6045 85.5778   5
  11   6   0-2.78206 64.0838   2
  11   6   0-43.0598 66.6779   3
 -12  -6   0 12028.8 459.233   4
 -12   6   0 11303.9 178.595   5
 -12   6   0 10246.7 223.153   5
 -12   6   0 12346.2 299.938   6
 -12   6   0 12244.5 288.262   2
 -12  -6   0 12246.4 490.381   5
  12   6   0 12138.1 479.438   6
  12   6   0 11850.1 427.815   2
  12  -6   0 12414.3 361.451   3
  12   6   0 12098.0 433.902   3
 -13  -6   0-29.9371 79.4677   5
  13   6   0-36.6705 78.3881   2
 -13   6   0-33.7274 30.0360   5
 -13  -6   0 6.73388 75.5777   4
  13   6   0 32.9879 83.6539   6
 -13   6   0 58.3997 42.4155   2
 -13   6   0-39.7994 39.8765   5
  13   6   0-62.6523 63.5370   3
  13  -6   0 76.0456 64.6068   3
 -13   6   0-70.9440 67.2092   6
 -14   6   0-156.385 76.9467   6
 -14  -6   0 106.506 101.330   4
  14  -6   0 7.36033 33.2532   6
 -14   6   0-50.5979 53.9246   5
 -14   6   0 60.6463 47.3580   2
 -14   6   0-27.4600 35.5427   5
  14   6   0 115.348 81.6240   3
  14  -6   0-12.3078 53.9633   3
  14   6   0 47.3312 69.2443   2
 -14  -6   0-56.7771 99.4290   5
  14   6   0 4.31858 79.2562   6
  15   6   0 1.29938 68.7545   3
  15  -6   0 21.3252 36.7591   6
 -15   6   0-3.16142 57.5776   5
 -15  -6   0 149.454 109.594   5
 -15  -6   0 45.5947 87.8864   4
  15  -6   0-73.9311 61.7436   3
  15   6   0-38.2988 85.0426   6
 -15   6   0-139.765 51.1394   5
 -15   6   0-70.3698 50.6548   2
  15   6   0-34.7277 72.4623   2
  16  -6   0 678.513 105.047   3
 -16   6   0 695.515 106.549   5
  16  -6   0 625.913 77.9271   6
  16   6   0 523.723 137.180   6
  16   6   0 584.615 124.145   3
 -16   6   0 594.729 82.4840   2
 -16   6   0 566.115 66.1449   5
  16   6   0 618.437 122.370   2
 -16  -6   0 465.908 117.380   4
 -16  -6   0 408.176 134.334   5
 -17  -6   0 790.965 186.928   5
  17  -6   0 607.993 108.251   3
 -17   6   0 279.811 84.4281   5
  17   6   0 463.932 118.088   2
  17   6   0 423.130 125.690   3
 -17   6   0 393.332 66.6145   2
 -17  -6   0 654.662 132.620   4
  17   6   0 585.225 149.820   6
 -17   6   0 490.841 78.7493   5
  17  -6   0 536.711 76.1822   6
  18   6   0 34136.6 829.643   2
 -18   6   0 34207.7 553.055   2
 -18  -6   0 33828.7 808.557   4
  18   6   0 32243.3 793.685   3
  18   6   0 31137.9 839.532   6
  18  -6   0 35421.3 707.259   3
 -18   6   0 34637.9 587.447   5
 -18  -6   0 32757.2 912.683   5
  18  -6   0 35005.3 551.396   6
 -18   6   0 33744.0 512.589   5
 -19   6   0 52.5141 80.1776   5
 -19   6   0-50.8428 93.2946   5
  19   6   0 159.749 95.5630   3
  19  -6   0 75.1431 67.8349   3
  19   6   0 55.6982 90.3573   2
  19   6   0-23.6190 103.548   6
 -19  -6   0 231.988 150.630   5
 -19  -6   0 251.126 108.762   4
  19  -6   0 83.5664 49.7014   6
 -19   6   0 143.219 60.8113   2
 -20  -6   0 423.841 167.358   5
 -20  -6   0 539.615 135.966   4
  20   6   0 306.163 106.367   3
 -20   6   0 334.951 103.945   5
  20   6   0 369.082 115.916   2
 -20   6   0 265.776 66.3768   2
  20  -6   0 370.308 103.709   3
  20  -6   0 400.182 80.7421   6
 -21  -6   0 189.876 103.513   4
  21  -6   0 205.653 66.0003   6
 -21   6   0 250.613 78.8786   2
  21  -6   0 223.343 86.7307   3
 -21  -6   0 251.411 149.775   5
 -21   6   0 151.923 100.896   5
  22  -6   0 1830.97 180.939   3
  22  -6   0 1532.33 134.901   6
 -22   6   0 1948.16 187.775   5
 -22  -6   0 1756.11 248.276   5
 -22   6   0 1856.53 154.502   2
 -22  -6   0 1435.76 193.531   4
  23  -6   0 107.449 75.2080   3
 -23   6   0 85.9459 72.8567   2
 -23   6   0-136.747 117.932   5
  23  -6   0 118.324 59.3923   6
 -23  -6   0 322.049 174.311   5
 -23  -6   0 20.5136 92.8807   4
 -24  -6   0 273.435 151.737   5
 -24   6   0 255.614 128.930   5
  24  -6   0 189.239 89.6789   3
 -24  -6   0 204.757 112.490   4
  24  -6   0 238.634 73.8396   6
 -24   6   0 246.251 89.2731   2
  24   6   0 163.564 144.425   6
  25   6   0 193.862 122.041   3
 -25   6   0 69.7181 129.667   5
 -25   6   0 157.475 83.5115   2
  25   6   0 106.387 52.0057   4
 -25  -6   0 143.632 176.240   5
  25   6   0 375.247 190.132   6
  25  -6   0 47.3152 54.9866   6
 -25  -6   0 118.610 103.425   4
  25   6   0 119.054 135.065   2
  25  -6   0 172.090 94.1145   3
 -26   6   0 70.4498 88.0036   2
  26   6   0 85.9587 112.110   3
 -26  -6   0 109.570 107.791   4
  26   6   0 90.8435 38.5309   4
  26   6   0-55.7690 53.9049   4
  26  -6   0 47.6916 59.2167   6
  26   6   0 186.879 161.094   6
 -26   6   0 22.9524 126.347   5
 -26  -6   0 131.878 159.226   5
 -27   6   0 246.292 106.358   2
 -27  -6   0 218.349 135.388   4
  27   6   0 245.168 157.597   3
  27   6   0 289.387 166.990   6
  27  -6   0 208.000 85.1722   6
 -27   6   0 164.049 132.930   5
 -27  -6   0 358.438 192.229   5
 -28   6   0 283.302 110.813   2
  28   6   0-63.0083 181.088   6
  28  -6   0 111.478 92.3835   6
 -28  -6   0 166.799 164.917   5
 -28  -6   0 42.1851 135.462   4
 -28   6   0 22.4473 152.854   5
  28   6   0 203.223 153.855   3
 -29   6   0 50.5008 92.0039   2
  29   6   0-89.9039 142.417   3
  29  -6   0-46.5008 81.6175   6
 -29   6   0 175.739 183.444   5
 -29  -6   0 351.641 193.054   4
 -29  -6   0-57.2726 192.487   5
  29   6   0 225.200 202.653   6
 -30  -6   0 2497.79 285.821   4
  30  -6   0 2983.90 276.528   3
  30   6   0 2910.02 327.680   3
  30  -6   0 2701.96 218.492   6
  30   6   0 2389.42 327.785   6
 -30  -6   0 3055.37 375.273   5
 -30   6   0 3427.66 332.883   5
 -30   6   0 3057.30 235.854   2
  31   6   0-52.1712 183.583   6
 -31   6   0 126.620 184.142   5
 -31  -6   0-249.932 194.162   5
 -31  -6   0-366.985 202.343   4
  31   6   0 51.3517 158.899   3
  31  -6   0 80.9939 112.101   3
 -31   6   0-92.0032 106.260   2
  31  -6   0 28.0720 78.0946   6
 -32   6   0 103.472 104.468   2
  32   6   0 78.1231 161.174   3
 -32   6   0-4.62100 183.804   5
 -32  -6   0-41.7140 183.907   4
  32  -6   0 85.7704 85.1626   6
 -32  -6   0 107.167 197.073   5
  32   6   0 248.013 206.852   6
  32  -6   0 85.3738 116.654   3
  33  -6   0-20.4697 94.2652   6
 -33   6   0-19.8728 115.348   2
 -33  -6   0-173.397 222.932   4
 -33   6   0-152.690 184.872   5
 -33  -6   0 504.857 264.064   5
  33   6   0 127.175 196.315   3
  33  -6   0 276.659 155.558   3
  33   6   0 134.469 215.746   6
 -34  -6   0 1218.10 309.261   5
 -34  -6   0 795.713 242.764   4
  34   6   0 829.781 251.700   6
  34  -6   0 678.993 175.867   3
  34   6   0 1065.38 263.041   3
 -34   6   0 1186.74 190.591   2
 -34   6   0 1361.86 267.553   5
  35   6   0 371.882 278.781   6
 -35   6   0 334.717 164.803   2
 -35   6   0 431.275 240.878   5
 -35  -6   0 37.4128 254.162   5
 -35  -6   0 821.214 299.843   4
  35  -6   0-11.7819 140.080   3
  35   6   0 137.707 205.851   3
 -36  -6   0 1041.60 301.263   5
 -36   6   0 903.306 180.382   2
 -36  -6   0 661.021 277.998   4
 -36   6   0 636.542 249.984   5
  36   6   0 1505.14 317.605   3
  36  -6   0 611.418 181.685   3
  36   6   0 1247.91 311.268   6
  37   6   0-159.369 206.966   3
  37  -6   0 31.4793 168.715   3
 -37  -6   0 150.530 263.558   5
 -37  -6   0-242.062 278.645   4
 -37   6   0-189.200 169.725   2
  37   6   0-150.322 228.012   6
  38   6   0 110.434 227.573   3
 -38  -6   0 123.796 245.364   5
  38  -6   0 6.77011 144.531   3
 -38  -6   0 91.2683 291.819   4
  38   6   0 158.030 249.655   6
 -38   6   0-236.904 205.985   2
 -39  -6   0 980.230 329.311   4
  39   6   0 6.34917 186.877   3
  39  -6   0 339.545 171.917   3
 -39  -6   0 380.111 299.777   5
  39   6   0 102.554 222.652   6
  40   6   0 320.937 225.023   3
  40  -6   0 281.419 164.712   3
  40   6   0 394.735 228.982   6
 -40  -6   0-2.42530 271.196   5
  41  -6   0 144.267 175.903   3
  41   6   0-191.440 242.103   6
 -41  -6   0-512.702 303.121   5
  41   6   0 27.0273 200.250   3
 -41  -6   0 77.2554 230.092   2
  42   6   0 208.513 219.411   3
 -42  -6   0 1084.60 268.675   2
  42   6   0 858.781 293.617   6
 -42  -6   0 451.203 323.212   5
  42  -6   0 534.354 213.208   3
   0   7   0 331.796 76.1056   2
   0   7   0 257.744 75.7796   6
   0  -7   0 244.545 108.812   4
   0  -7   0 269.418 72.9617   5
  -1   7   0 88.0801 53.4047   2
  -1   7   0-6.63331 65.3630   6
  -1  -7   0 167.886 105.944   4
  -1   7   0-139.601 98.7133   5
   1  -7   0 99.6603 78.6688   4
   1   7   0 133.817 63.6237   6
  -1  -7   0 104.237 69.0715   5
   1  -7   0 127.123 59.2924   5
   1   7   0 121.205 63.5898   2
  -2   7   0 125279. 1055.80   2
  -2  -7   0 140982. 1576.17   4
   2   7   0 127218. 1157.65   2
   2  -7   0 128077. 969.534   5
   2  -7   0 127921. 1332.23   4
  -2   7   0 129371. 1098.23   6
  -2   7   0 137987. 1140.32   5
  -2  -7   0 127054. 1170.83   5
   2   7   0 129950. 1242.75   6
  -3   7   0 40.7009 71.2834   5
  -3   7   0 134.362 52.9987   2
   3   7   0 212.900 74.7907   2
  -3  -7   0 134.948 80.8345   4
   3   7   0 157.644 78.4534   6
  -3   7   0 126.159 60.1087   6
   3  -7   0 200.752 82.5295   4
  -3  -7   0 123.377 64.2430   5
   3  -7   0 211.520 59.6680   5
  -4  -7   0 2056.20 201.230   4
  -4   7   0 2026.99 136.282   6
  -4   7   0 2230.32 142.254   2
   4  -7   0 1351.01 116.585   6
   4   7   0 1976.13 172.147   6
  -4  -7   0 2230.25 180.052   5
   4   7   0 2111.57 164.481   2
  -4   7   0 2241.12 138.074   5
   4  -7   0 2265.19 115.724   5
  -5   7   0 13.0356 49.7083   6
  -5  -7   0-6.31510 70.1526   5
   5   7   0 131.410 75.5863   6
  -5   7   0 74.2145 46.8667   2
   5  -7   0-29.7992 62.8043   6
  -5  -7   0-36.5998 94.5318   4
   5   7   0 97.5639 65.1151   2
   5  -7   0 76.5503 42.0437   5
  -5   7   0 61.9726 54.1643   5
   6   7   0 114964. 1311.68   6
   6  -7   0 114092. 659.483   5
  -6   7   0 112377. 926.270   2
  -6   7   0 116354. 791.404   5
  -6  -7   0 110606. 1255.57   5
   6  -7   0 113256. 875.853   6
  -6  -7   0 114508. 1404.89   4
  -6   7   0 112663. 909.156   6
   6   7   0 112839. 1215.20   2
  -7  -7   0 257.373 101.973   4
  -7   7   0 41.6721 115.510   4
   7  -7   0 179.357 30.8550   5
  -7   7   0 31.4756 45.6410   5
  -7  -7   0 141.024 86.2993   5
   7   7   0 183.703 77.7089   2
  -7   7   0 149.213 49.1594   6
  -7   7   0 179.038 52.4140   2
   7   7   0 136.980 79.4492   6
   8  -7   0 39.0315 21.2527   5
   8   7   0 32.5092 55.9152   2
  -8  -7   0 124.508 94.3019   4
   8   7   0 59.2058 75.6945   6
  -8   7   0-17.4827 43.1623   2
  -8  -7   0 102.059 71.2173   5
  -8   7   0-13.3019 85.8177   4
  -8   7   0 69.8891 32.7535   5
  -8   7   0 34.0474 41.1236   6
  -9  -7   0 8.35669 72.9021   4
  -9   7   0 40.0163 40.5413   2
   9   7   0-99.0372 79.8294   6
  -9   7   0 5.87640 82.1983   4
  -9   7   0-26.5113 28.0391   5
  -9   7   0 32.5975 37.8154   6
  -9  -7   0-26.5375 82.5751   5
   9   7   0-61.8821 60.0130   2
   9   7   0 20.1581 58.3990   3
 -10   7   0 4701.30 174.653   6
 -10   7   0 4085.91 240.879   4
  10   7   0 4585.21 299.685   6
 -10   7   0 4612.70 180.491   6
 -10  -7   0 4523.37 293.548   5
  10   7   0 4828.43 284.004   3
 -10   7   0 4639.86 186.518   2
 -10  -7   0 4640.14 303.239   4
  10   7   0 4716.39 276.781   2
 -11   7   0 87.6697 45.8077   2
  11   7   0 94.4276 90.3322   6
 -11  -7   0 106.681 99.2339   4
 -11  -7   0 133.028 95.7959   5
 -11   7   0 96.0252 47.7288   6
 -11   7   0-18.7348 51.7822   6
  11   7   0 111.667 84.9376   3
  11   7   0 62.5400 65.9110   2
  12   7   0 6463.25 334.935   3
 -12  -7   0 6274.72 352.800   4
  12   7   0 6153.11 326.150   2
 -12   7   0 6292.77 218.754   2
 -12  -7   0 5966.58 355.449   5
  12   7   0 6532.67 372.062   6
 -12   7   0 6475.14 210.764   6
 -12   7   0 6339.34 231.137   6
  12  -7   0 6709.57 276.434   3
  13  -7   0-33.3454 54.8264   3
  13   7   0 16.8152 83.0054   6
  13   7   0 8.63500 65.2782   3
  13   7   0-28.4754 72.3381   2
 -13   7   0 14.9016 25.0044   5
 -13   7   0-179.682 78.7404   6
 -13   7   0 12.1492 33.7871   5
 -13   7   0 91.1854 50.7083   2
 -13  -7   0 84.1983 100.476   4
 -13  -7   0-4.71871 92.5984   5
 -14   7   0 2144.07 134.183   2
 -14  -7   0 2116.76 219.051   4
  14  -7   0 2324.88 174.075   3
  14   7   0 2190.27 206.035   3
 -14   7   0 2012.56 83.0721   5
 -14   7   0 1805.51 101.753   5
  14   7   0 2222.76 233.755   6
  14   7   0 2230.39 208.125   2
 -14  -7   0 2077.51 232.899   5
 -15   7   0 18.4597 47.9169   2
  15   7   0 114.553 91.5679   3
 -15   7   0 37.4919 48.0740   5
  15  -7   0 29.6486 61.9790   3
  15   7   0 109.537 88.4653   2
 -15  -7   0-63.9251 108.850   4
 -15   7   0 83.6793 36.1502   5
  15   7   0-99.6779 106.657   6
 -16  -7   0 10903.7 483.764   4
 -16   7   0 11820.7 287.995   5
  16   7   0 12061.6 481.650   2
  16  -7   0 12773.9 410.925   3
  16   7   0 11841.4 478.896   3
 -16   7   0 12663.7 327.929   2
 -16   7   0 11827.9 221.824   5
 -17   7   0 31.1647 53.2286   2
 -17  -7   0-97.7772 98.9332   4
  17  -7   0 179.001 85.1429   3
  17   7   0 203.535 98.0888   3
 -17   7   0 129.402 53.5499   5
 -17   7   0-28.6174 74.3520   5
  17   7   0 176.502 102.290   2
  18   7   0 1799.02 208.270   2
 -18   7   0 1972.77 142.243   2
  18  -7   0 1811.46 129.281   6
 -18   7   0 1911.33 144.945   5
  18  -7   0 2012.72 177.401   3
 -18   7   0 1855.24 113.167   5
 -18  -7   0 1596.26 204.193   4
  18   7   0 1634.37 198.196   3
  19  -7   0 1383.76 117.685   6
 -19   7   0 1291.41 106.477   5
  19  -7   0 1367.68 152.353   3
 -19   7   0 1427.46 146.301   5
 -19  -7   0 1807.63 223.603   4
 -19   7   0 1153.05 119.648   2
 -20   7   0 524.018 111.916   5
 -20   7   0 356.936 72.4078   5
 -20   7   0 504.297 91.4685   2
 -20  -7   0 549.020 146.865   4
  20  -7   0 531.552 106.466   3
  20  -7   0 475.089 80.0406   6
  21  -7   0-0.79894 63.2733   3
 -21   7   0 93.0275 96.2717   5
 -21  -7   0 46.5320 143.886   5
 -21  -7   0 6.91248 100.338   4
 -21   7   0-42.3013 60.2818   2
  21  -7   0 28.3565 57.7278   6
 -22  -7   0 4042.14 374.331   5
  22   7   0 4216.14 359.459   6
  22  -7   0 4214.87 274.244   3
 -22  -7   0 3863.64 318.968   4
 -22   7   0 4180.03 220.028   2
 -22   7   0 4470.86 252.310   5
  22  -7   0 3691.70 195.304   6
 -23   7   0-66.0952 73.5184   2
 -23  -7   0-126.752 123.317   4
 -23   7   0-29.3770 99.4893   5
  23   7   0 103.307 136.176   2
  23  -7   0-18.2060 51.8281   6
 -23  -7   0-69.2884 149.418   5
  23  -7   0 13.7479 73.3792   3
  23   7   0 120.750 143.218   6
  23   7   0-189.996 137.042   3
 -24   7   0 15581.4 439.802   2
  24   7   0 14124.7 587.832   2
  24  -7   0 14531.9 413.794   6
 -24   7   0 16403.8 501.977   5
  24   7   0 14011.2 638.061   6
 -24  -7   0 14650.5 693.987   5
  24  -7   0 15342.9 533.957   3
 -24  -7   0 14583.1 604.339   4
  24   7   0 14390.5 605.901   3
 -25   7   0 260.867 133.318   5
 -25   7   0 232.057 94.6381   2
  25   7   0 402.721 181.479   6
 -25  -7   0 578.351 228.607   5
 -25  -7   0 585.589 191.220   4
  25  -7   0 374.973 90.4824   6
  25   7   0 471.548 165.401   2
  25   7   0 265.526 149.319   3
 -26   7   0 14426.2 447.694   2
 -26  -7   0 12982.5 679.211   5
  26  -7   0 12827.0 410.069   6
 -26   7   0 15150.4 528.876   5
 -26  -7   0 13839.9 603.612   4
  26   7   0 12802.9 592.914   3
  26   7   0 12470.8 628.034   6
  26   7   0 12812.7 577.168   2
  27   7   0 39.3870 128.095   3
 -27   7   0-2.57851 84.5408   2
 -27  -7   0 329.572 205.004   5
 -27  -7   0 177.122 149.460   4
  27   7   0-135.798 145.968   2
  27   7   0-91.0388 68.5049   4
 -27   7   0 91.0885 156.671   5
  27   7   0-150.018 156.329   6
  27  -7   0-62.4178 83.2864   6
 -28  -7   0 819.583 230.289   5
  28   7   0 981.456 237.531   6
 -28   7   0 984.338 144.780   2
  28   7   0 858.658 200.190   3
 -28   7   0 1194.75 223.426   5
  28  -7   0 581.789 117.557   6
 -28  -7   0 828.440 198.857   4
 -29   7   0 12.3871 161.317   5
  29  -7   0 77.9669 89.5142   6
  29  -7   0 2.04668 103.099   3
  29   7   0-125.808 169.233   6
 -29  -7   0-59.2600 169.080   4
 -29   7   0 39.9525 90.0991   2
  29   7   0-169.669 151.663   3
 -29  -7   0 46.4339 179.864   5
  30   7   0 295.539 158.269   3
 -30   7   0 480.459 186.143   5
  30   7   0 204.176 178.932   6
 -30   7   0 411.456 120.126   2
 -30  -7   0 715.760 224.242   4
 -30  -7   0 238.578 189.553   5
  30  -7   0 474.959 119.031   6
  30  -7   0 366.113 146.761   3
  31   7   0 74.7572 214.269   6
 -31   7   0-48.9375 111.037   2
  31   7   0 45.1941 152.361   3
 -31  -7   0 387.356 239.361   5
  31  -7   0 152.786 131.121   3
 -31   7   0-204.465 191.527   5
 -31  -7   0-191.134 196.437   4
  31  -7   0 156.362 98.7978   6
 -32  -7   0 1532.12 312.725   5
 -32   7   0 2229.90 300.382   5
  32   7   0 1996.33 332.089   6
  32  -7   0 1500.35 177.736   6
 -32   7   0 2063.85 218.793   2
 -32  -7   0 1588.83 271.937   4
  32   7   0 1531.81 267.198   3
  32  -7   0 1441.35 213.602   3
  33   7   0-96.8015 187.512   3
  33  -7   0-16.1182 121.034   3
 -33  -7   0-485.346 253.499   4
 -33  -7   0-474.381 260.039   5
 -33   7   0-82.2925 128.110   2
  33   7   0-214.073 240.347   6
 -33   7   0 114.858 197.165   5
  33  -7   0 62.8719 104.588   6
  34   7   0 1286.00 279.472   3
 -34  -7   0 1520.46 301.912   4
  34   7   0 1487.81 311.472   6
  34  -7   0 1181.50 207.569   3
 -34  -7   0 1330.53 322.509   5
  34  -7   0 1210.55 175.545   6
 -34   7   0 1399.51 205.080   2
  35   7   0-33.6853 202.858   6
 -35   7   0 120.028 140.482   2
 -35  -7   0 430.595 258.904   5
  35  -7   0-125.553 137.328   3
  35   7   0 127.197 210.998   3
 -35  -7   0 189.102 242.418   4
  36   7   0-63.0390 196.454   3
 -36  -7   0 500.409 293.773   4
 -36  -7   0 31.5428 257.405   5
  36  -7   0-7.37052 145.020   3
 -36   7   0-181.625 172.398   2
  36   7   0 423.514 270.539   6
 -37  -7   0-48.2160 270.447   5
 -37  -7   0-114.613 264.197   4
 -37   7   0-221.715 194.875   2
  37  -7   0-181.386 151.452   3
  37   7   0-91.6105 229.874   6
  37   7   0 200.422 224.728   3
 -38  -7   0 3266.76 428.561   4
 -38  -7   0 2924.90 463.299   5
  38   7   0 2631.42 395.026   6
  38  -7   0 2569.92 306.602   3
  38   7   0 3093.42 415.626   3
  39   7   0 32.3505 228.880   6
 -39  -7   0-323.127 279.455   5
  39  -7   0-140.732 163.728   3
 -39  -7   0 294.359 310.577   4
  39   7   0 153.636 225.177   3
  40  -7   0 1343.79 259.497   3
 -40  -7   0 1057.08 342.442   5
  40   7   0 807.811 274.465   3
 -40  -7   0 1572.80 356.023   4
  40   7   0 592.483 263.637   6
  41  -7   0-269.527 178.488   3
  41   7   0-212.195 231.319   6
  41   7   0 419.383 252.909   3
 -41  -7   0 434.503 344.176   5
  42  -7   0 346.929 201.093   3
  42   7   0 305.778 208.782   3
  42   7   0 416.147 268.265   6
 -42  -7   0 706.448 312.212   5
   0   8   0 2778.30 192.516   6
   0  -8   0 2720.14 175.457   5
   0   8   0 2824.18 186.173   2
   0  -8   0 3064.48 249.941   4
  -1   8   0 3.00662 56.3262   6
  -1   8   0 141.799 67.4325   2
  -1  -8   0-116.008 99.6720   4
   1   8   0 39.0007 60.5178   6
   1  -8   0 72.4109 84.1021   4
  -1  -8   0 65.4317 65.7506   5
   1   8   0-7.16432 53.0048   2
   1  -8   0 100.359 63.8461   5
   2   8   0 2325.98 191.193   6
  -2   8   0 572.451 124.647   5
  -2  -8   0 2519.65 242.254   4
  -2  -8   0 2061.82 169.147   5
   2  -8   0 2110.12 141.092   5
   2  -8   0 1975.18 187.394   4
  -2   8   0 2159.26 156.106   2
  -2   8   0 2195.01 162.079   6
   2   8   0 2184.59 169.333   2
   3   8   0 33.7193 51.5669   2
   3  -8   0 3.86088 51.9272   5
  -3   8   0-75.1782 63.3821   2
  -3   8   0 26.6498 52.7544   6
  -3   8   0-121.380 87.0872   5
   3   8   0-194.847 82.9554   6
  -3  -8   0 31.1003 73.2525   5
   3  -8   0 103.761 75.7556   4
  -3  -8   0 17.9585 101.642   4
   4  -8   0 18013.3 350.256   5
  -4   8   0 17948.2 416.167   2
  -4  -8   0 17328.4 582.786   4
   4   8   0 17345.9 475.177   2
  -4   8   0 18695.0 424.369   5
  -4   8   0 18139.8 428.608   6
  -4  -8   0 17285.7 492.342   5
   4   8   0 17275.0 515.892   6
   5  -8   0 10.0049 44.7884   5
   5   8   0 75.7032 79.9686   6
  -5  -8   0-7.79159 86.1924   5
   5   8   0-50.2229 64.3603   2
  -5   8   0-9.94919 45.1587   2
  -5   8   0-161.048 77.6440   5
  -5  -8   0-28.9107 90.9510   4
  -5   8   0 6.04337 51.3120   6
  -6   8   0 521.617 80.7592   2
  -6   8   0 508.137 84.6839   5
   6   8   0 419.038 93.4012   2
  -6  -8   0 312.574 113.042   4
   6  -8   0 580.944 65.7513   5
  -6  -8   0 535.651 114.048   5
   6   8   0 363.996 96.6946   6
  -6   8   0 616.282 91.9725   6
   7  -8   0 0.05472 33.0504   5
  -7   8   0-48.8274 57.6815   5
  -7   8   0 7.80691 47.6021   6
   7   8   0-55.6889 66.0120   2
  -7  -8   0 150.237 101.038   4
  -7   8   0-32.0253 42.1996   2
   7   8   0-26.9673 85.6426   6
  -7  -8   0-69.0763 79.0170   5
  -8  -8   0 26288.0 680.060   5
   8  -8   0 27060.3 304.875   5
   8   8   0 27512.6 704.632   6
  -8  -8   0 26699.9 733.713   4
  -8   8   0 27130.2 485.144   2
   8   8   0 27930.9 663.443   2
  -8   8   0 26964.8 387.869   5
  -8   8   0 27776.6 470.095   6
  -9   8   0-4.97349 43.0259   5
  -9  -8   0-50.6240 84.4883   5
   9   8   0 57.2833 91.2222   6
  -9   8   0 146.842 52.5990   2
  -9  -8   0 53.0647 83.6086   4
  -9   8   0 245.866 65.9682   6
   9  -8   0 124.239 28.1075   5
   9   8   0 99.4594 66.9333   2
 -10   8   0 14.9343 44.2981   6
  10   8   0 92.4339 68.4271   2
 -10  -8   0-66.9981 91.6162   4
  10   8   0 78.7206 80.6136   3
 -10  -8   0 149.189 99.5574   5
 -10   8   0 25.3825 32.6788   5
 -10   8   0 109.370 54.3110   2
  10  -8   0 129.703 28.8053   5
  10   8   0 134.158 87.7513   6
 -11  -8   0-78.0480 119.342   4
  11   8   0-9.12488 64.2428   2
 -11   8   0-58.5016 54.7930   6
  11   8   0 38.5310 90.9829   6
 -11  -8   0-125.183 97.4976   5
 -11   8   0-30.3758 33.9938   5
 -11   8   0-40.7498 53.5454   2
  11   8   0 43.6636 69.6307   3
 -12  -8   0 10533.3 474.093   5
 -12   8   0 9970.84 409.789   4
  12   8   0 10846.3 497.816   6
 -12  -8   0 11163.2 493.781   4
 -12   8   0 10886.6 304.750   2
  12   8   0 11336.0 456.760   2
  12   8   0 11480.0 460.002   3
 -12   8   0 11113.4 285.024   6
 -13   8   0 216.270 57.4162   6
  13   8   0 56.1321 70.7280   2
 -13  -8   0 241.091 114.709   4
 -13  -8   0 227.575 114.740   5
 -13   8   0-10.0615 127.844   4
  13   8   0 79.7307 68.9758   3
 -13   8   0 193.095 60.0159   2
 -14  -8   0 5951.70 373.273   4
 -14   8   0 5651.09 208.538   6
 -14   8   0 5582.71 221.607   2
  14   8   0 6013.40 345.727   2
 -14   8   0 4394.01 114.058   5
  14   8   0 5757.62 339.364   3
 -14   8   0 4585.72 146.869   5
 -15  -8   0-90.7939 117.178   4
 -15   8   0 44.7835 52.4650   2
  15   8   0 29.6721 73.0480   3
 -15   8   0 75.6148 32.4660   5
 -15   8   0-99.4860 58.9954   5
  15  -8   0-23.9423 72.9841   3
  15   8   0 63.8197 88.2730   2
 -16   8   0 33329.3 331.612   5
  16  -8   0 40574.8 754.954   3
 -16  -8   0 37420.8 928.161   4
 -16   8   0 33675.1 435.901   5
  16   8   0 39436.4 902.224   3
 -16   8   0 37691.2 579.109   2
  16   8   0 38968.6 893.385   2
 -17  -8   0 291.835 137.414   4
  17  -8   0 333.314 88.2464   3
 -17   8   0 249.742 47.1059   5
 -17   8   0 138.970 55.5487   2
 -17   8   0 130.900 58.9835   5
 -18   8   0 6404.36 226.120   5
 -18  -8   0 6626.48 400.550   4
 -18   8   0 6991.39 261.555   2
  18  -8   0 7212.42 332.947   3
 -18   8   0 6456.43 166.811   5
 -19   8   0 14.7342 73.1087   5
 -19   8   0 71.1702 63.8659   2
 -19  -8   0 11.2953 104.053   4
 -19   8   0-1.08048 43.8387   5
  19  -8   0-58.4338 75.8520   3
  20  -8   0 43.1541 61.3826   3
 -20   8   0 77.9516 64.8111   2
 -20   8   0-2.01605 75.5366   5
 -20  -8   0 93.9394 113.351   4
 -20   8   0 37.7658 49.4698   5
 -21   8   0 72.9625 83.4050   5
 -21   8   0-36.9609 71.4745   2
 -21   8   0 140.309 67.8152   5
 -21  -8   0 366.916 155.214   4
  21  -8   0 153.792 92.6151   3
  21   8   0 97.8982 146.403   6
  22  -8   0 198.298 90.6199   3
 -22  -8   0 427.014 198.946   5
 -22   8   0 277.618 84.8118   2
 -22   8   0-113.738 100.459   5
  22  -8   0 245.792 65.4175   6
  22   8   0 257.094 139.030   3
 -22  -8   0 686.687 191.216   4
 -22   8   0 207.300 89.3453   5
  22   8   0 399.930 156.169   2
  22   8   0 232.333 142.229   6
 -23   8   0-99.7525 108.175   5
  23  -8   0-12.2948 57.0048   6
 -23  -8   0 3.13863 129.184   4
 -23   8   0 33.9841 75.0106   2
  23   8   0 23.2246 126.817   2
  23   8   0 92.2666 154.953   6
 -23  -8   0-124.350 182.277   5
  23   8   0 35.1884 112.797   3
  23  -8   0-38.4427 96.1365   3
  24   8   0 7971.26 464.460   2
 -24   8   0 8560.25 355.919   5
 -24  -8   0 6773.62 441.084   4
 -24   8   0 8152.72 331.641   2
  24  -8   0 7240.93 290.929   6
 -24  -8   0 7662.95 520.831   5
  24   8   0 7788.88 468.268   3
  24   8   0 7472.17 491.198   6
  25   8   0 64.9425 160.779   6
 -25   8   0 302.770 105.329   2
  25  -8   0 139.631 73.9630   6
 -25  -8   0 256.396 181.739   5
 -25   8   0 326.752 149.806   5
  25   8   0 76.3250 135.852   3
 -25  -8   0 423.025 174.837   4
  25   8   0-72.2310 151.182   2
  26   8   0 2018.12 264.964   2
 -26   8   0 2103.93 181.543   2
 -26  -8   0 2125.21 274.396   4
  26  -8   0 1861.81 157.554   6
 -26  -8   0 1805.99 299.495   5
 -26   8   0 2506.24 238.234   5
  26   8   0 1828.03 251.269   3
  26   8   0 1489.60 251.239   6
  27  -8   0-43.2330 73.5732   6
 -27   8   0-65.5902 82.4561   2
 -27  -8   0 24.2555 152.479   4
  27   8   0 93.9276 156.641   3
 -27   8   0-50.4876 147.511   5
 -27  -8   0 75.1958 209.812   5
  27   8   0-42.4683 143.074   2
  27   8   0-306.990 210.606   6
 -28   8   0 18362.0 596.984   5
  28   8   0 15392.0 668.610   2
 -28  -8   0 15318.2 685.052   4
  28  -8   0 15342.1 586.339   3
  28  -8   0 14653.8 440.922   6
  28   8   0 14643.3 670.405   3
  28   8   0 14871.6 724.656   6
 -28  -8   0 15249.5 772.778   5
 -28   8   0 16229.7 491.175   2
 -29   8   0 112.478 164.445   5
 -29  -8   0 145.679 214.624   5
  29   8   0-38.8232 141.776   3
  29   8   0 228.318 180.430   6
  29  -8   0 91.1397 124.987   3
 -29   8   0 115.686 97.2719   2
  29  -8   0 165.739 91.0195   6
 -29  -8   0 65.2385 167.787   4
 -30   8   0 114.474 122.176   2
  30  -8   0 106.325 127.748   3
 -30  -8   0-26.8142 195.703   5
 -30  -8   0 236.645 205.762   4
  30   8   0 201.878 168.126   3
 -30   8   0 29.6293 166.211   5
  30  -8   0 62.3405 82.5988   6
  30   8   0-2.58065 183.619   6
  31  -8   0 118.533 98.1533   6
 -31  -8   0-14.7505 188.157   5
 -31   8   0-117.629 134.417   2
  31   8   0 103.979 158.483   3
 -31   8   0-442.791 223.564   5
  31  -8   0-126.103 129.206   3
  31   8   0-244.035 234.900   6
 -31  -8   0 128.796 209.947   4
 -32  -8   0 2916.21 361.791   4
  32  -8   0 2857.16 220.800   6
  32   8   0 3043.67 341.793   3
 -32  -8   0 2968.18 393.555   5
  32  -8   0 2904.66 285.679   3
  32   8   0 3350.13 403.944   6
 -32   8   0 3246.75 251.906   2
 -33   8   0-88.0224 122.281   2
  33  -8   0-32.0625 119.576   6
  33   8   0 164.849 191.392   3
  33   8   0 107.284 208.948   6
 -33  -8   0 292.685 230.537   5
 -33  -8   0-495.925 270.491   4
  33  -8   0 259.827 149.012   3
 -34  -8   0 3371.58 392.372   4
  34   8   0 3276.00 381.418   3
  34   8   0 3334.34 406.634   6
 -34  -8   0 3020.77 431.888   5
 -34   8   0 3928.23 296.880   2
  34  -8   0 3643.55 328.337   3
  35   8   0 367.946 244.325   3
  35   8   0-41.1381 217.352   6
 -35   8   0 402.157 174.441   2
  35  -8   0 352.547 180.709   3
 -35  -8   0 240.186 261.846   5
 -35  -8   0 480.924 262.385   4
 -36  -8   0 265.825 264.844   5
 -36   8   0 197.120 181.609   2
  36   8   0 566.997 255.609   3
  36   8   0 195.805 236.662   6
  36  -8   0 234.479 149.957   3
 -36  -8   0 1072.84 320.477   4
  37  -8   0 53.7425 149.990   3
 -37  -8   0-54.2280 262.755   5
  37   8   0-68.0441 234.097   6
 -37  -8   0 481.675 318.778   4
  37   8   0-208.040 243.319   3
  38  -8   0 1244.53 241.350   3
 -38  -8   0 1399.44 356.450   4
  38   8   0 1541.38 360.215   6
 -38  -8   0 1298.04 341.788   5
  38   8   0 1554.36 327.055   3
 -39  -8   0 228.352 276.226   5
  39   8   0 33.2917 250.628   6
  39  -8   0 199.666 175.945   3
  39   8   0-98.4460 212.833   3
 -39  -8   0-210.957 297.672   4
  40   8   0 361.388 269.424   3
  40   8   0 233.542 257.324   6
 -40  -8   0 593.084 331.870   5
  40  -8   0 165.569 169.823   3
 -40  -8   0 314.883 326.701   4
  41   8   0-42.7870 230.858   6
  41  -8   0 68.5770 169.306   3
 -41  -8   0 109.313 288.237   5
  41   8   0 56.6527 213.956   3
 -41  -8   0 433.583 333.113   4
   0   9   0-18.3767 62.9334   6
   0   9   0-11.3311 51.6767   2
   0  -9   0 10.7598 87.4275   4
   0  -9   0 80.2427 63.3278   5
  -1  -9   0 110.970 104.788   4
  -1  -9   0-19.2632 70.1610   5
  -1   9   0 86.2654 78.4038   6
   1   9   0-10.9650 56.9323   2
  -1   9   0-32.3783 53.0673   2
   1  -9   0 75.0593 59.3934   5
   1  -9   0 52.1244 87.7729   4
   1   9   0 54.9158 72.1183   6
  -2   9   0 6297.39 290.962   6
  -2  -9   0 6723.98 399.791   4
   2  -9   0 6079.93 338.638   4
  -2  -9   0 6166.63 291.467   5
   2   9   0 6162.50 294.119   2
   2   9   0 6396.08 322.849   6
   2  -9   0 6594.30 257.982   5
  -2   9   0 6474.84 284.723   2
   3  -9   0 74.3912 60.7705   5
  -3  -9   0 104.036 84.3389   5
   3  -9   0 57.8231 94.2401   4
   3   9   0-61.4308 90.6190   6
  -3  -9   0 66.9822 102.742   4
   3   9   0 2.45332 55.5551   2
  -3   9   0 12.4740 49.0934   2
  -3   9   0-33.0409 64.2348   6
  -4  -9   0-49.7772 79.5367   5
  -4  -9   0-57.9346 102.384   4
  -4   9   0 57.8076 50.9940   2
   4   9   0 95.6051 88.8122   6
  -4   9   0 46.9763 58.8396   6
   4  -9   0-72.3789 61.1703   5
   4   9   0-12.9701 60.2899   2
   5   9   0 89.5275 77.2539   2
   5   9   0-13.5442 65.9311   6
  -5  -9   0 65.4343 83.7112   5
  -5   9   0-18.7834 75.7473   5
  -5   9   0 9.67209 49.5052   2
   5  -9   0 19.7748 49.5629   5
  -5   9   0-26.8132 58.4960   6
  -6  -9   0 827.631 138.714   5
   6  -9   0 942.544 84.7719   5
  -6   9   0 916.216 107.222   2
  -6   9   0 1052.29 122.371   5
   6   9   0 941.095 132.965   2
  -6   9   0 937.560 111.796   6
   6   9   0 802.533 132.481   6
  -6  -9   0 976.397 172.345   4
  -7   9   0 154.643 72.7788   6
  -7   9   0-39.6456 58.5250   2
   7  -9   0 92.2389 48.5283   5
  -7   9   0 145.516 75.4604   5
  -7  -9   0 36.6370 86.3290   5
   7   9   0 11.6990 60.8997   2
  -7  -9   0 85.7886 105.437   4
   7   9   0 173.175 96.5111   6
  -8   9   0 352.921 75.3031   6
  -8   9   0 302.390 73.4230   5
   8   9   0 277.924 89.8642   2
  -8  -9   0 200.394 111.690   4
   8  -9   0 425.196 55.4091   5
   8   9   0 312.946 104.245   6
  -8  -9   0 450.369 122.140   5
  -8   9   0 422.341 80.3940   2
   9   9   0 165.739 92.8221   2
  -9   9   0 46.0837 59.4759   6
   9  -9   0-20.8682 32.5578   5
   9   9   0 128.451 99.2748   6
  -9  -9   0 41.9536 90.0048   5
  -9   9   0-16.3507 50.2882   2
  -9   9   0-1.32835 59.6336   5
  -9  -9   0-96.9305 110.855   4
  10  -9   0 14887.0 220.735   5
  10   9   0 17035.4 559.174   2
 -10  -9   0 16885.0 631.708   4
 -10   9   0 15906.3 302.753   5
  10   9   0 16721.6 604.455   6
 -10   9   0 16078.0 392.880   2
 -10   9   0 16512.5 382.168   6
 -10  -9   0 16148.2 576.148   5
 -11   9   0 340.786 72.4932   6
 -11  -9   0 210.152 115.140   4
  11  -9   0 360.483 40.0612   5
 -11   9   0 164.846 52.4203   5
  11   9   0 246.973 111.911   6
 -11   9   0 325.393 75.6768   2
 -11  -9   0 95.0218 94.6304   5
 -12   9   0 11323.4 223.841   5
 -12  -9   0 13731.8 556.964   5
 -12   9   0 14407.7 377.147   2
  12  -9   0 11151.1 185.622   5
 -12   9   0 13836.1 341.218   6
 -12  -9   0 13949.8 581.422   4
 -13  -9   0 208.362 135.415   4
 -13   9   0 21.1516 52.8646   6
 -13   9   0 16.9614 52.8963   2
 -13  -9   0-56.6085 108.540   5
 -14  -9   0-14.4590 98.8920   4
 -14   9   0-62.3349 64.9802   6
 -14   9   0 95.0908 63.5989   2
 -15  -9   0 565.012 152.331   4
 -15   9   0 163.048 59.6480   2
 -15   9   0 244.466 66.7090   6
 -16  -9   0 1744.19 222.506   4
 -16   9   0 1840.17 141.369   2
 -16   9   0 1380.52 70.0624   5
 -16   9   0 2077.02 141.278   6
 -16   9   0 1356.89 86.2723   5
 -17  -9   0-175.655 152.331   4
 -17   9   0-84.1298 59.9718   5
 -17   9   0-27.6731 74.8331   6
 -17   9   0-53.1773 37.4925   5
 -17   9   0 43.9610 55.1464   2
 -18   9   0 24868.4 504.210   2
 -18   9   0 21332.9 364.632   5
 -18   9   0 20556.0 263.177   5
 -18  -9   0 25125.7 809.668   4
  18  -9   0 26240.9 647.704   3
 -19  -9   0 104.906 123.518   4
 -19   9   0 303.810 50.0347   5
 -19   9   0 89.3317 60.0183   5
 -19   9   0 410.935 91.9120   2
  19  -9   0 323.736 94.4873   3
  20   9   0 229.005 137.924   2
  20  -9   0 115.867 75.1291   3
 -20   9   0 181.885 48.7422   5
 -20   9   0 107.716 65.1746   2
 -20  -9   0 238.097 135.954   4
  20   9   0 276.675 133.921   3
 -20   9   0 24.5736 64.9148   5
  21   9   0 5.58133 161.611   6
  21   9   0 90.8641 135.875   3
 -21   9   0-5.49838 66.9555   2
  21  -9   0-15.3963 72.6517   3
 -21   9   0 28.8986 74.3796   5
  21   9   0 14.0106 114.732   2
 -21   9   0-62.0013 51.0220   5
 -21  -9   0 242.602 131.484   4
  22   9   0 3558.47 335.753   2
  22   9   0 2910.13 295.711   3
 -22   9   0 3086.40 197.336   2
 -22   9   0 2767.07 182.003   5
  22   9   0 3193.66 334.137   6
 -22   9   0 2612.89 125.363   5
 -22  -9   0 2968.44 322.386   4
 -22  -9   0 2927.30 344.722   5
 -23  -9   0 452.007 187.196   4
  23   9   0-192.756 147.237   3
 -23   9   0 54.0020 89.9995   5
 -23   9   0-68.0332 76.2106   2
  23   9   0-262.193 178.041   6
  23   9   0-82.8427 141.038   2
 -23   9   0 138.813 64.3115   5
 -23  -9   0 130.218 169.587   5
 -24  -9   0 193.070 168.408   5
  24   9   0 150.404 152.833   3
 -24  -9   0-312.046 172.772   4
 -24   9   0 62.0354 97.1749   5
  24   9   0 190.185 155.696   2
 -24   9   0 171.679 91.6236   2
  24   9   0 136.292 176.123   6
 -24   9   0-324.294 102.515   5
 -25   9   0 70.9193 78.7272   2
  25   9   0-99.1326 131.767   2
  25   9   0-79.2713 158.083   6
 -25   9   0-39.5019 115.979   5
 -25  -9   0 346.179 219.051   5
 -25  -9   0 137.537 159.808   4
  25   9   0-134.304 151.896   3
 -26   9   0 3108.79 219.016   2
  26   9   0 3248.40 340.601   3
 -26  -9   0 3108.97 380.933   5
  26   9   0 2966.94 322.232   2
 -26  -9   0 2973.46 326.233   4
  26   9   0 3087.05 357.395   6
 -26   9   0 3716.01 267.555   5
 -27  -9   0 272.306 193.954   4
 -27   9   0 198.158 108.030   2
  27  -9   0-33.9409 73.1779   6
  27  -9   0-139.170 120.163   3
  27   9   0-154.127 185.149   6
 -27  -9   0 13.9821 185.226   5
  27   9   0-103.573 148.240   2
  27   9   0-3.53178 150.134   3
 -27   9   0 65.8340 139.953   5
 -28   9   0 1629.68 177.302   2
  28  -9   0 1213.88 184.173   3
  28   9   0 1369.99 244.190   3
  28   9   0 1318.69 229.032   2
 -28   9   0 1346.93 192.643   5
  28   9   0 1272.31 255.018   6
  28  -9   0 951.377 125.852   6
 -28  -9   0 1242.35 287.444   5
 -28  -9   0 1432.29 261.742   4
 -29  -9   0 159.485 215.757   5
  29  -9   0 21.9816 82.2535   6
  29   9   0 87.8022 149.194   3
  29  -9   0 64.3334 114.021   3
 -29  -9   0 348.153 221.823   4
 -29   9   0 45.8777 104.104   2
  29   9   0 336.112 183.817   2
  29   9   0-178.005 209.014   6
  30   9   0 322.301 175.646   3
  30   9   0 447.168 241.099   6
 -30   9   0 508.375 137.153   2
  30  -9   0 126.039 131.059   3
 -30  -9   0 412.210 196.694   4
 -30  -9   0 268.727 197.858   5
  30   9   0 560.387 209.286   2
  30  -9   0 129.004 79.9244   6
 -31  -9   0-41.0363 206.961   4
 -31   9   0 37.8855 119.248   2
  31  -9   0 40.5769 114.109   3
  31  -9   0-197.083 128.181   6
  31   9   0 90.0308 172.698   3
  31   9   0-187.737 204.726   6
 -31  -9   0 187.317 239.663   5
 -32  -9   0 94.7413 206.043   5
  32   9   0 254.313 210.646   6
 -32  -9   0 306.766 233.559   4
  32  -9   0 730.399 188.255   3
 -32   9   0 397.527 139.003   2
  32   9   0 579.777 203.337   3
 -33   9   0 78.7005 126.592   2
  33  -9   0 42.8195 125.765   3
 -33  -9   0 108.679 200.806   5
  33   9   0 107.671 168.364   3
  33   9   0-280.796 224.836   6
 -33  -9   0 202.437 216.104   4
  34   9   0-31.6291 224.639   6
  34   9   0 63.0552 171.546   3
 -34   9   0 91.3983 137.684   2
 -34  -9   0-121.402 241.423   4
  34  -9   0-15.5862 144.973   3
 -34  -9   0-187.324 258.334   5
 -35  -9   0 233.353 230.417   4
  35   9   0 218.832 246.614   6
  35  -9   0-157.518 147.726   3
 -35  -9   0-17.1842 221.886   5
  35   9   0 104.420 181.818   3
 -36  -9   0 578.261 279.645   5
  36   9   0 38.2624 235.544   6
 -36  -9   0 349.412 277.961   4
  36   9   0 313.644 228.905   3
  36  -9   0 592.960 197.306   3
  37   9   0 290.261 240.150   6
 -37  -9   0 96.4988 284.546   5
  37   9   0 413.874 272.033   3
 -37  -9   0 215.709 273.645   4
  37  -9   0 56.7702 144.859   3
 -38  -9   0 2015.59 395.401   4
  38   9   0 892.144 306.267   6
  38  -9   0 1399.80 252.723   3
 -38  -9   0 1269.70 372.144   5
  38   9   0 960.143 294.988   3
 -39  -9   0 359.264 310.094   5
  39   9   0 232.653 258.069   3
  39   9   0 145.565 250.317   6
  39  -9   0-94.0295 177.168   3
 -39  -9   0-335.313 336.178   4
 -40  -9   0 9.02778 270.531   5
 -40  -9   0 511.580 352.440   4
  40  -9   0 470.936 199.809   3
  40   9   0 398.847 304.920   6
  40   9   0 679.440 293.817   3
   0 -10   0 6904.34 304.574   5
   0  10   0 7198.96 340.953   6
   0  10   0 7274.65 330.838   2
   0 -10   0 6673.55 388.968   4
  -1  10   0-3.48925 62.1625   2
   1  10   0-125.122 89.2967   6
  -1 -10   0-65.6907 118.004   4
   1  10   0 9.96439 62.8631   2
   1 -10   0 37.1107 63.8420   5
  -1 -10   0 21.5239 72.1174   5
   1 -10   0 57.9680 104.182   4
  -1  10   0 14.1448 74.6297   6
  -2 -10   0 116.765 109.581   4
   2  10   0-36.8444 59.5869   2
  -2  10   0 3.90276 54.5409   2
  -2  10   0-15.2209 70.1557   6
  -2 -10   0 67.5259 80.0870   5
   2  10   0-62.3374 88.4923   6
   2 -10   0-21.0089 58.6674   5
   2 -10   0-66.1426 96.5821   4
  -3  10   0-51.8651 61.9447   2
   3 -10   0 96.3633 64.2286   5
  -3 -10   0-12.5341 85.1258   5
  -3  10   0 181.421 88.3268   6
  -3 -10   0-36.8545 99.9720   4
   3  10   0 5.68763 72.3933   6
   3 -10   0 54.2917 91.0783   4
   3  10   0 119.743 75.1656   2
  -4 -10   0 243.579 118.518   4
   4 -10   0 65.5596 51.3907   5
  -4  10   0-21.1568 68.0125   6
   4  10   0 107.432 86.4789   6
  -4 -10   0 103.975 95.1040   5
   4  10   0 116.699 80.9706   2
  -4  10   0 164.765 74.9365   2
  -5 -10   0 11.7744 109.088   4
   5  10   0 5.34231 67.9675   2
   5 -10   0 16.6037 52.2699   5
   5  10   0-37.8298 78.8353   6
  -5  10   0-44.0588 55.7638   2
  -5 -10   0-5.36126 78.2522   5
  -5  10   0 47.9217 65.2127   6
   6 -10   0 107.511 50.5869   5
  -6  10   0 41.4059 58.7493   2
  -6  10   0 148.156 75.0569   6
   6  10   0 87.4791 75.8214   2
   6  10   0 100.813 85.5112   6
  -6 -10   0 213.150 119.165   4
  -6 -10   0 184.161 100.120   5
  -6  10   0-348.373 139.511   5
   7  10   0-48.1092 75.5575   2
  -7  10   0 206.371 95.6703   5
   7 -10   0 56.1851 46.5222   5
  -7  10   0 43.5417 62.5667   6
  -7 -10   0 3.47700 87.4700   5
  -7  10   0 71.1554 55.4611   2
   7  10   0 4.43926 81.6437   6
   8  10   0 2094.97 223.322   6
  -8  10   0 2426.21 174.782   5
   8  10   0 2042.15 213.020   2
  -8  10   0 2308.16 169.577   2
   8 -10   0 2447.80 123.076   5
  -8 -10   0 2304.75 231.717   5
  -8  10   0 2302.87 174.418   6
  -9  10   0 116.950 84.4751   5
   9 -10   0 338.571 56.7349   5
  -9 -10   0-23.6120 89.1701   5
   9  10   0 171.921 116.267   6
  -9  10   0 260.285 85.6746   6
  -9  10   0 207.037 71.1452   2
 -10  10   0 14277.2 390.299   6
  10 -10   0 13977.2 236.721   5
  10  10   0 14600.5 587.844   6
 -10  10   0 14944.2 410.846   2
 -10 -10   0 14236.8 559.447   5
 -10  10   0 15336.4 347.520   5
 -11 -10   0 748.597 170.663   5
 -11  10   0 661.514 95.6036   6
 -11  10   0 669.044 107.560   2
 -11  10   0 466.319 85.4016   5
  11  10   0 542.123 150.775   6
  11 -10   0 689.894 57.6589   5
 -12  10   0 32722.2 592.695   2
  12 -10   0 28900.8 312.544   5
 -12 -10   0 32095.1 867.961   5
 -12  10   0 30723.2 422.754   5
 -12 -10   0 33054.0 930.471   4
 -12  10   0 33010.7 565.469   6
  13 -10   0 384.618 42.9526   5
 -13 -10   0 479.671 144.906   4
 -13  10   0 275.883 57.9333   5
 -13  10   0 460.226 88.9891   2
 -13  10   0 803.766 108.057   6
 -14  10   0 11332.8 327.414   6
 -14 -10   0 11352.3 561.630   4
 -14  10   0 11553.3 356.252   2
 -15  10   0 42.9860 58.9625   2
 -15  10   0-26.2112 65.1287   6
 -15 -10   0 17.1803 125.273   4
 -16  10   0 10182.9 310.435   6
 -16 -10   0 10067.6 531.714   4
 -16  10   0 9888.91 330.537   2
 -17 -10   0-192.675 143.503   4
 -17  10   0 74.6448 65.6517   2
 -17  10   0 23.4202 66.7174   6
 -18  10   0 191.483 72.6377   2
  18  10   0 407.307 152.079   3
 -18 -10   0 146.731 139.416   4
  18  10   0 77.0555 126.145   2
 -18  10   0 230.179 74.3797   6
 -19  10   0 40.6984 31.2064   5
 -19  10   0-115.670 53.8125   5
 -19  10   0 16.6240 67.1996   6
 -19  10   0 60.2113 60.4851   2
  19  10   0 60.4835 128.671   2
  19  10   0-58.6017 124.484   3
 -19 -10   0-85.0012 151.577   4
 -20  10   0 2198.16 165.439   6
  20  10   0 2235.49 298.543   6
 -20  10   0 1431.72 74.8915   5
 -20  10   0 1485.10 110.005   5
 -20  10   0 2315.33 176.120   2
  20  10   0 2435.37 274.197   3
  20  10   0 2157.00 263.880   2
 -20 -10   0 2297.87 294.163   4
 -21 -10   0 228.487 170.295   4
 -21 -10   0-80.7223 171.560   5
 -21  10   0-47.5196 76.9403   2
  21  10   0 52.6471 115.162   3
  21  10   0-34.7259 120.902   2
  21  10   0 151.482 158.569   6
 -21  10   0 10.3126 71.1883   6
 -21  10   0-51.9600 39.9784   5
 -21  10   0-40.5634 57.5615   5
 -22  10   0 1405.88 128.838   5
 -22 -10   0 1682.74 292.065   5
  22  10   0 2043.03 269.607   2
 -22  10   0 1308.93 82.0753   5
 -22 -10   0 1633.28 251.820   4
  22  10   0 1471.14 259.082   6
  22  10   0 1788.81 249.682   3
 -22  10   0 1630.57 154.496   2
  23  10   0 16.2326 154.104   2
 -23 -10   0 150.230 184.804   5
 -23  10   0 17.5404 84.4342   5
 -23  10   0 72.0257 81.6636   2
 -23 -10   0 464.406 188.630   4
  23  10   0-14.1509 161.990   6
 -23  10   0-61.3677 51.8212   5
  23  10   0 32.2845 122.172   3
 -24  10   0 514.195 113.062   5
  24  10   0 436.455 172.882   3
 -24  10   0 392.655 102.187   2
 -24 -10   0 1010.36 258.091   4
  24  10   0 496.165 178.077   2
 -24 -10   0 112.234 162.245   5
  24  10   0 607.627 218.729   6
 -25  10   0-95.3880 107.472   5
  25  10   0 223.986 159.059   3
  25  10   0 73.4293 147.335   2
 -25 -10   0 160.981 198.485   5
 -25  10   0 78.4579 88.9021   2
  25  10   0-15.2326 163.047   6
 -25 -10   0 234.264 166.968   4
  26  10   0-11.7765 138.481   3
 -26  10   0-156.556 128.193   5
  26  10   0-158.028 136.194   2
 -26 -10   0 104.071 181.441   5
 -26 -10   0 52.0934 164.066   4
  26 -10   0 112.873 98.1980   3
 -26  10   0 131.422 101.841   2
  26  10   0-193.543 175.122   6
 -27 -10   0 155.610 176.183   4
  27  10   0 45.4385 160.409   2
  27 -10   0-57.4671 105.109   3
  27  10   0 191.419 175.738   3
 -27  10   0 148.706 96.5287   2
  27  10   0-110.427 193.599   6
 -27 -10   0 329.750 228.175   5
 -28 -10   0 4421.35 425.721   4
 -28  10   0 3732.17 254.849   2
  28  10   0 3513.75 393.245   6
 -28 -10   0 3764.85 421.079   5
  28  10   0 3898.43 380.883   2
  28  10   0 3584.66 365.265   3
  28 -10   0 3807.23 312.623   3
  29 -10   0 116.907 121.519   3
  29  10   0-142.900 177.431   2
 -29  10   0 188.993 110.958   2
  29  10   0-125.162 206.549   6
 -29 -10   0 109.781 195.605   4
 -29 -10   0-0.05488 211.331   5
  29  10   0-37.4126 159.678   3
  30 -10   0 13.8026 118.902   3
 -30 -10   0 49.5287 207.777   5
  30  10   0 188.526 187.310   2
  30  10   0-7.04485 196.466   6
 -30  10   0 165.569 116.320   2
  30  10   0-38.5020 164.645   3
 -30 -10   0-84.1619 179.994   4
  31 -10   0 120.196 144.370   3
  31  10   0-161.559 216.591   6
 -31 -10   0 248.122 225.876   4
 -31 -10   0 290.539 236.254   5
  31  10   0 141.088 179.647   2
  31  10   0-42.0283 170.158   3
 -31  10   0 213.785 124.018   2
 -32 -10   0 394.537 239.144   4
  32 -10   0 402.416 153.080   3
 -32 -10   0 333.265 251.640   5
  32  10   0 497.839 210.388   3
 -32  10   0 312.543 131.663   2
  32  10   0 830.058 294.324   6
 -33 -10   0 278.994 260.571   4
  33  10   0-90.2702 187.395   3
 -33 -10   0-30.7140 251.209   5
  33  10   0 17.1344 217.809   6
  33 -10   0 239.882 170.932   3
 -33  10   0-338.661 173.198   2
 -34 -10   0 1672.31 351.021   4
  34  10   0 1780.37 299.564   3
  34  10   0 2009.85 357.872   6
  34 -10   0 2018.69 276.444   3
 -34 -10   0 2574.86 420.502   5
 -35 -10   0-207.602 263.920   5
 -35 -10   0 478.454 279.513   4
  35  10   0 524.078 245.984   3
  35  10   0 352.990 284.293   6
  35 -10   0 259.551 162.816   3
  36  10   0 193.790 252.818   6
  36  10   0 329.310 213.716   3
  36 -10   0 634.460 199.165   3
 -36 -10   0 687.656 303.022   5
 -36 -10   0 369.267 268.840   4
  37 -10   0-193.708 153.445   3
 -37 -10   0 145.665 276.176   4
  37  10   0-221.319 205.582   3
  37  10   0-209.629 255.206   6
  38  10   0 302.381 256.307   3
  38 -10   0-224.210 189.963   3
  38  10   0 361.240 267.614   6
 -38 -10   0 191.384 249.421   5
 -38 -10   0-141.810 296.496   4
  39  10   0-121.788 258.656   6
 -39 -10   0 181.795 288.931   5
 -39 -10   0 534.558 346.100   4
  39  10   0-341.514 274.654   3
  39 -10   0-45.4729 161.179   3
 -40 -10   0 410.187 327.674   4
  40 -10   0 208.275 166.100   3
  40  10   0 168.244 289.624   6
 -40 -10   0 286.999 288.678   5
  40  10   0 116.002 241.792   3
   0 -11   0-12.4307 81.9223   5
   0 -11   0 282.751 120.619   4
   0  11   0 307.557 107.084   6
   0  11   0 295.641 104.006   2
   1  11   0-24.1032 71.4910   2
  -1 -11   0-109.916 93.7967   5
   1 -11   0-42.7094 63.5451   5
  -1 -11   0-110.712 111.753   4
  -1  11   0 186.255 100.307   6
   1  11   0-226.365 111.370   6
   1 -11   0 54.8326 104.578   4
  -1  11   0-97.0293 78.5439   2
   2  11   0 1051.81 147.591   2
   2  11   0 1130.15 169.536   6
  -2  11   0 1049.76 140.580   6
  -2  11   0 1076.69 143.834   2
   2 -11   0 1286.69 194.380   4
  -2 -11   0 1021.84 201.553   4
  -2 -11   0 1311.11 165.670   5
   2 -11   0 999.022 119.243   5
  -3 -11   0 275.951 147.936   4
  -3  11   0 90.2401 89.1823   6
   3 -11   0 52.6989 62.3254   5
   3  11   0 200.185 115.801   6
   3 -11   0 203.297 121.626   4
   3  11   0 297.884 111.451   2
  -3 -11   0 239.986 97.6918   5
  -3  11   0 190.059 77.1480   2
  -4 -11   0 8531.07 503.685   4
   4  11   0 8508.41 389.436   2
   4  11   0 8637.02 425.725   6
  -4  11   0 8795.68 374.802   6
  -4 -11   0 8184.25 381.037   5
  -4  11   0 8507.73 352.450   2
   4 -11   0 8271.96 294.645   5
   5  11   0 202.796 113.984   6
  -5 -11   0-161.151 165.065   4
   5 -11   0 328.078 81.0492   5
   5  11   0 89.8056 81.7870   2
  -5 -11   0 114.683 90.0569   5
  -5  11   0 139.549 70.1323   2
  -5  11   0 40.2461 73.7622   6
   6  11   0 13113.9 541.493   6
  -6 -11   0 12845.2 498.993   5
   6 -11   0 14163.7 352.161   5
  -6  11   0 13867.9 437.892   2
   6  11   0 12827.9 492.379   2
  -6  11   0 13297.6 439.424   6
   7  11   0 234.841 118.895   6
  -7  11   0 216.383 88.3395   6
   7  11   0 367.591 128.440   2
   7 -11   0 384.071 81.6299   5
  -7  11   0 164.991 75.0254   2
  -7 -11   0 201.590 109.649   5
  -8 -11   0 20416.4 658.859   5
   8 -11   0 22916.1 390.032   5
   8  11   0 21285.7 699.872   6
  -8  11   0 24526.0 563.749   5
  -8  11   0 22226.2 543.456   6
   8  11   0 21906.6 673.785   2
  -8  11   0 22708.8 554.526   2
  -9  11   0 21.4119 67.8108   2
   9  11   0 10.8226 96.1015   6
  -9 -11   0-28.5863 96.1457   5
  -9  11   0 197.942 87.6203   6
   9 -11   0 52.3613 46.5762   5
  -9  11   0 204.737 108.665   5
 -10  11   0 4806.57 254.919   2
 -10  11   0 4732.70 249.685   6
 -10  11   0 5081.05 237.087   5
  10 -11   0 4798.37 158.297   5
 -10 -11   0 4332.52 328.129   5
  10  11   0 4971.94 365.522   6
 -11  11   0 67.7246 60.6404   2
 -11  11   0-3.87153 79.0375   6
 -11 -11   0 53.5883 103.897   5
  11 -11   0 83.6075 39.8309   5
 -11  11   0 91.9885 80.1705   5
  11  11   0-297.418 129.510   6
 -12  11   0 2370.77 180.596   2
 -12  11   0 2167.05 141.923   5
  12 -11   0 2076.09 93.5964   5
 -12  11   0 2372.04 176.662   6
  12  11   0 2273.57 273.949   6
  13 -11   0 58.0891 27.3976   5
 -13  11   0-16.7490 62.0199   2
 -13  11   0 41.1729 70.5431   6
 -13 -11   0 19.6053 153.278   4
 -13  11   0-32.5450 66.2150   5
 -14  11   0 15817.5 299.814   5
 -14 -11   0 18542.5 748.175   4
 -14  11   0 18421.9 444.304   6
  14 -11   0 12191.0 204.521   5
 -14  11   0 17919.5 461.687   2
 -15  11   0-22.9635 78.9074   6
 -15 -11   0-79.4280 163.692   4
 -15  11   0-22.3043 62.3585   2
 -16  11   0 2850.87 181.282   6
 -16 -11   0 2910.89 321.023   5
 -16 -11   0 3224.62 335.319   4
 -16  11   0 2894.74 196.181   2
  17  11   0 190.181 140.220   3
 -17  11   0-3.94230 74.3640   6
 -17 -11   0 94.5460 158.172   4
 -17 -11   0 79.0562 160.964   5
 -17  11   0-13.6941 70.9338   2
  18  11   0 1521.20 239.733   2
 -18  11   0 1187.22 132.059   6
 -18  11   0 1104.89 128.117   2
  18  11   0 1328.71 206.961   3
 -18 -11   0 1393.39 256.340   4
 -18 -11   0 1153.29 235.114   5
 -19  11   0 202.987 86.2012   6
  19  11   0 118.897 174.785   6
 -19  11   0 276.204 93.0664   2
 -19 -11   0 288.217 171.737   4
  19  11   0 225.604 135.927   3
 -19 -11   0 166.468 170.818   5
  19  11   0 169.311 124.811   2
 -20 -11   0 12074.4 643.597   4
  20  11   0 13359.1 616.393   2
 -20  11   0 11503.5 349.074   6
  20  11   0 12072.8 585.771   3
  20  11   0 11559.5 619.918   6
 -20  11   0 11793.8 386.223   2
 -20 -11   0 12316.4 648.053   5
 -21  11   0 40.5778 78.8304   2
 -21 -11   0-104.410 186.056   5
  21  11   0 226.984 151.583   3
  21  11   0-148.073 159.104   2
 -21 -11   0 195.244 183.970   4
 -21  11   0 27.1744 73.4592   6
  21  11   0 50.7195 179.068   6
  22  11   0 297.574 158.874   3
 -22 -11   0 655.225 212.295   4
  22  11   0 421.845 195.236   6
 -22  11   0 269.967 93.4437   6
 -22  11   0 188.850 88.2501   2
 -22 -11   0 293.666 207.661   5
  22  11   0 316.474 167.060   2
 -23  11   0-57.1739 64.1520   5
 -23  11   0 140.314 94.1076   2
 -23 -11   0 138.952 163.275   4
 -23 -11   0 89.8742 170.614   5
 -23  11   0 195.933 90.8375   6
  23  11   0-144.737 166.892   2
  23  11   0 115.663 170.789   3
  23  11   0 113.116 181.952   6
  24 -11   0 176.143 101.252   3
  24  11   0 391.972 197.721   6
  24  11   0 345.152 164.496   3
 -24 -11   0 246.362 186.144   4
 -24  11   0 417.994 109.950   2
 -24  11   0 270.322 96.0397   6
 -24 -11   0 439.207 211.607   5
  24  11   0 253.125 174.465   2
  25  11   0 50.7068 145.950   3
  25 -11   0 194.724 121.096   3
 -25  11   0 19.4580 99.1948   6
  25  11   0-131.128 192.055   6
 -25 -11   0 28.0369 182.195   5
  25  11   0-151.665 175.447   2
 -25  11   0 132.392 86.6767   2
 -26 -11   0 1591.01 298.068   5
  26  11   0 1851.06 282.408   2
 -26  11   0 1323.36 163.421   2
  26 -11   0 1362.75 198.786   3
 -26 -11   0 1357.66 273.163   4
  26  11   0 1477.99 297.541   6
  26  11   0 1795.05 280.906   3
  27 -11   0 218.418 134.839   3
  27  11   0 218.776 164.794   3
  27  11   0 122.961 195.231   6
 -27  11   0-2.37066 99.7815   2
 -27 -11   0 403.164 201.530   5
  27  11   0 41.5973 145.571   2
 -27 -11   0 695.985 238.525   4
 -28  11   0 351.476 126.284   2
  28  11   0 392.732 196.277   2
  28  11   0 256.808 189.194   3
 -28 -11   0-65.7570 187.567   5
 -28 -11   0 455.356 208.681   4
  28 -11   0 226.578 119.020   3
  28  11   0-25.9076 189.547   6
  29  11   0-110.771 164.152   3
  29  11   0 29.7793 189.512   6
 -29 -11   0 348.283 248.120   5
  29 -11   0 18.7930 109.216   3
 -29  11   0 241.127 132.323   2
  29  11   0-110.728 186.376   2
 -29 -11   0 327.162 219.430   4
  30 -11   0 625.970 177.283   3
  30  11   0 313.924 226.096   6
 -30 -11   0 578.113 276.333   4
  30  11   0 144.871 187.032   2
  30  11   0 58.0002 165.470   3
 -30 -11   0 70.1699 205.953   5
 -30  11   0 183.974 120.638   2
  31  11   0 2.82441 200.764   6
 -31 -11   0-153.096 226.386   4
  31  11   0-88.6138 197.361   3
  31  11   0 283.670 208.422   2
  31 -11   0 23.8910 126.423   3
 -31  11   0 96.5478 124.266   2
 -31 -11   0-217.055 233.575   5
  32  11   0 1824.59 314.933   3
 -32 -11   0 1782.20 345.603   5
  32  11   0 1400.96 267.514   2
  32 -11   0 2259.34 274.650   3
 -32  11   0 1593.84 209.624   2
 -32 -11   0 2293.35 357.634   4
  32  11   0 1712.21 347.630   6
 -33 -11   0-294.390 230.197   5
  33  11   0-38.7596 190.414   2
  33  11   0-116.184 231.439   6
  33 -11   0-82.8660 147.572   3
  33  11   0-89.6374 188.974   3
 -33 -11   0-404.039 277.818   4
 -34 -11   0 4200.50 496.955   5
  34  11   0 4825.55 516.039   6
 -34 -11   0 4514.19 482.946   4
  34 -11   0 4141.39 368.422   3
  34  11   0 4222.55 439.819   3
  35 -11   0 73.2248 149.225   3
 -35 -11   0-347.169 292.033   4
  35  11   0-31.9761 238.840   6
 -35 -11   0 5.22231 234.218   5
  35  11   0-136.222 204.481   3
  36  11   0 780.509 318.408   6
 -36 -11   0 850.302 315.785   4
  36 -11   0 651.838 194.264   3
 -36 -11   0 1038.35 317.471   5
  36  11   0 1074.09 279.861   3
  37  11   0 192.003 206.236   3
 -37 -11   0 236.534 291.885   5
 -37 -11   0 170.869 282.866   4
  37  11   0 143.190 261.895   6
  37 -11   0-95.6101 154.823   3
  38 -11   0 48.9417 161.954   3
 -38 -11   0 250.047 288.526   5
  38  11   0-458.934 316.007   6
 -38 -11   0 812.926 346.210   4
  38  11   0 143.264 211.663   3
 -39 -11   0-41.5909 321.873   4
  39  11   0 179.226 226.284   3
  39  11   0-108.712 283.141   6
  39 -11   0 67.4430 153.591   3
 -39 -11   0-184.595 280.049   5
   0 -12   0 191056. 2207.42   4
   0  12   0 185816. 1795.85   2
   0 -12   0 189097. 1693.37   5
   0  12   0 191217. 1925.54   6
  -1 -12   0 2438.07 234.612   5
  -1  12   0 2771.38 262.052   6
   1 -12   0 2221.34 199.675   5
  -1 -12   0 2661.79 302.084   4
  -1  12   0 2629.17 239.196   2
   1 -12   0 2886.81 294.119   4
   1  12   0 2568.85 264.651   6
   1  12   0 2265.75 231.377   2
  -2 -12   0 18557.4 719.687   4
   2  12   0 19271.6 596.513   2
   2 -12   0 18559.4 668.680   4
  -2 -12   0 19163.7 574.837   5
   2  12   0 19409.3 642.044   6
  -2  12   0 20546.4 617.792   6
  -2  12   0 21210.5 613.194   2
   2 -12   0 19432.1 511.852   5
   3 -12   0 48.5048 73.7392   5
  -3 -12   0-54.7254 97.2993   5
   3  12   0-215.330 136.686   6
   3  12   0-200.401 120.995   2
   3 -12   0-151.767 132.569   4
  -3 -12   0-292.001 170.423   4
  -3  12   0-220.811 123.395   6
  -3  12   0-54.7294 80.7064   2
   4  12   0 70554.7 1250.66   6
  -4 -12   0 75330.8 1500.12   4
   4 -12   0 72772.3 910.243   5
  -4 -12   0 69859.0 1139.88   5
  -4  12   0 72677.4 1086.66   2
   4  12   0 69575.1 1152.99   2
  -4  12   0 73509.8 1132.13   6
   5  12   0 101.618 83.6496   2
   5  12   0-12.7010 107.023   6
  -5  12   0 57.1374 81.7278   2
   5 -12   0 124.890 71.7899   5
  -5 -12   0-40.7055 103.230   5
  -5  12   0 80.8903 97.1506   6
   6  12   0-31.0900 94.9952   2
  -6  12   0-67.5282 75.0442   2
  -6 -12   0 106.856 102.161   5
   6 -12   0 58.6337 63.2576   5
   6  12   0 22.5122 98.6379   6
  -6  12   0 159.039 91.5081   6
  -7  12   0-70.8953 76.0118   6
   7  12   0 44.5420 105.135   6
  -7  12   0 49.2364 71.0112   2
  -7 -12   0-16.0705 100.490   5
   7 -12   0 78.6402 64.5280   5
   7  12   0 16.8173 80.1197   2
  -8  12   0 162.300 87.6917   2
   8  12   0-48.3799 103.853   6
  -8  12   0-38.4484 96.9719   6
   8 -12   0 103.445 59.4783   5
  -8 -12   0 194.057 107.376   5
   8  12   0 13.0387 81.4082   2
   9  12   0 368.038 139.189   6
  -9  12   0 213.833 100.746   6
   9  12   0 10.1485 98.0902   2
  -9  12   0 25.3618 79.2685   2
   9 -12   0 127.471 53.4501   5
  -9 -12   0 36.8968 99.5837   5
  -9  12   0-415.866 157.590   5
 -10  12   0 134.889 107.009   5
  10 -12   0 64.7868 47.3435   5
  10  12   0 140.740 128.393   6
 -10  12   0 217.301 92.1531   2
 -10  12   0 245.389 100.207   6
  11  12   0 26.7230 116.848   6
 -11  12   0 12.4374 67.3065   2
  11 -12   0 53.1489 44.1879   5
 -11  12   0 57.5506 82.1010   6
 -11  12   0-89.1301 90.2106   5
 -12  12   0 479.559 105.573   5
 -12  12   0 234.719 96.7112   6
 -12  12   0 553.544 102.839   2
  12 -12   0 418.596 57.7718   5
  12  12   0 670.380 200.247   6
  13  12   0 45.4310 167.256   6
 -13  12   0 100.804 78.7421   5
 -13  12   0 97.9956 69.7213   2
  13 -12   0 61.8627 31.0154   5
 -13  12   0 48.1146 84.2810   6
 -14 -12   0 2604.03 322.957   4
  14  12   0 3328.10 359.114   6
 -14  12   0 2910.84 203.853   6
  14 -12   0 2260.48 91.4174   5
 -14 -12   0 2649.05 291.247   5
 -14  12   0 2978.26 208.420   2
 -14  12   0 2671.68 149.944   5
 -15  12   0 64.3943 81.7355   6
  15  12   0 90.5385 169.860   6
 -15 -12   0 34.2287 139.556   5
 -15  12   0 14.4200 52.4493   5
 -15  12   0-15.2776 71.4090   2
 -15 -12   0-134.738 185.713   4
 -16  12   0 601.854 110.255   2
 -16  12   0 609.005 112.227   6
  16  12   0 521.837 160.342   3
 -16 -12   0 486.349 186.208   4
 -16 -12   0 356.874 172.994   5
  16  12   0 634.096 221.191   6
 -17 -12   0-9.29784 139.369   5
 -17 -12   0-187.389 191.013   4
  17  12   0 81.2840 168.230   6
 -17  12   0-16.3232 82.0011   6
  17  12   0 30.5544 149.321   2
 -17  12   0-111.105 79.2659   2
  17  12   0-106.127 129.299   3
 -18  12   0 363.589 98.4770   6
  18  12   0 368.560 178.215   6
  18  12   0 402.811 152.092   3
 -18 -12   0 537.375 204.700   4
 -18 -12   0 441.183 172.799   5
 -18  12   0 633.880 117.649   2
  18  12   0 474.763 179.174   2
 -19 -12   0 191.551 179.775   4
  19  12   0 108.609 147.216   2
 -19  12   0-6.44672 79.6680   2
 -19 -12   0-23.8870 144.827   5
  19  12   0 66.5110 166.189   6
  19  12   0-11.3699 134.820   3
 -19  12   0 39.4624 80.5919   6
  20  12   0 629.740 188.704   3
 -20  12   0 739.019 128.099   2
  20  12   0 895.625 241.957   6
 -20  12   0 606.167 120.688   6
 -20 -12   0 396.784 199.119   4
  20  12   0 807.154 194.601   2
 -20 -12   0 704.844 193.568   5
  21  12   0-110.928 190.208   6
 -21 -12   0-6.93275 155.296   5
 -21 -12   0-277.175 189.950   4
  21  12   0-41.9771 142.617   2
 -21  12   0-7.20315 85.0288   6
  21  12   0 60.1608 137.965   3
 -21  12   0-90.1053 95.1894   2
 -22  12   0 1185.24 143.924   2
  22  12   0 1416.56 295.149   6
 -22 -12   0 1244.97 278.185   4
  22  12   0 1011.34 224.119   2
 -22 -12   0 1172.57 262.815   5
  22  12   0 1350.78 246.596   3
 -22  12   0 1207.98 145.633   6
  23  12   0-126.367 168.869   3
 -23  12   0-19.8273 82.9248   2
  23  12   0 77.2976 150.660   2
 -23 -12   0 186.950 190.904   5
 -23  12   0-47.0404 97.3883   6
 -23 -12   0 52.2903 192.447   4
  23  12   0 189.489 204.629   6
  24  12   0 1252.44 297.109   6
  24  12   0 1039.10 239.784   3
  24  12   0 865.594 212.068   2
 -24  12   0 1010.17 150.095   2
 -24 -12   0 927.119 250.268   4
 -24 -12   0 1053.26 277.083   5
 -24  12   0 879.909 136.593   6
 -25  12   0 25.6224 97.7225   6
 -25 -12   0-285.151 216.440   5
 -25 -12   0 232.142 215.425   4
  25  12   0 72.3238 184.679   6
  25  12   0-94.7803 160.698   3
 -25  12   0 180.144 113.336   2
  25  12   0 249.421 203.877   2
 -26 -12   0 379.565 225.486   4
 -26  12   0 246.231 112.517   6
  26  12   0 228.814 185.825   3
  26  12   0 105.784 160.075   2
  26  12   0 121.977 189.687   6
 -26 -12   0 304.514 213.630   5
 -26  12   0 131.911 111.214   2
 -27  12   0-27.7058 97.8638   2
 -27 -12   0 186.089 219.394   4
 -27  12   0-98.2534 121.697   6
  27  12   0 15.5836 161.302   3
  27  12   0 4.77056 152.466   2
  27  12   0 70.7633 193.711   6
 -27 -12   0 113.028 193.788   5
  28  12   0 109.457 198.841   6
 -28 -12   0 155.161 194.213   4
 -28 -12   0-181.867 232.720   5
  28  12   0-95.4322 173.936   3
 -28  12   0 169.944 125.832   2
  28  12   0-71.6418 163.833   2
  29  12   0 90.6732 176.862   3
  29 -12   0 74.4099 134.572   3
 -29 -12   0 395.229 259.072   5
  29  12   0-67.9767 203.674   6
 -29  12   0 49.3905 114.785   2
  29  12   0-57.6465 165.285   2
  30  12   0 660.670 237.604   6
 -30 -12   0 1229.69 299.316   4
  30 -12   0 1328.84 218.891   3
 -30 -12   0 1194.61 312.818   5
  30  12   0 1292.10 270.231   2
 -30  12   0 1415.90 195.945   2
  30  12   0 1102.97 269.021   3
 -31 -12   0 461.795 278.986   5
  31  12   0 249.313 222.312   6
  31  12   0-61.5330 178.753   2
 -31 -12   0 358.849 252.873   4
  31  12   0-41.1234 191.042   3
  31 -12   0 341.778 180.549   3
  32 -12   0 19.6787 141.890   3
  32  12   0 177.305 186.726   3
  32  12   0-41.5761 238.619   6
 -32 -12   0 396.847 274.097   4
 -32 -12   0-12.3763 236.987   5
  32  12   0 305.318 219.878   2
 -33 -12   0-236.381 254.146   5
  33 -12   0 105.589 156.414   3
  33  12   0 390.250 231.595   3
  33  12   0-77.2909 234.276   6
 -33 -12   0 74.8652 246.084   4
  33  12   0-156.393 221.975   2
 -34 -12   0 2642.96 436.250   5
  34  12   0 1810.69 313.963   3
  34 -12   0 2296.50 283.588   3
  34  12   0 2466.76 416.949   6
 -34 -12   0 2497.35 425.728   4
  34  12   0 2591.08 356.025   2
  35 -12   0-238.440 157.504   3
  35  12   0-331.255 295.261   6
 -35 -12   0-129.949 257.439   5
 -35 -12   0-380.762 323.437   4
  35  12   0-185.796 203.994   3
  36 -12   0 1735.54 275.929   3
  36  12   0 2338.64 368.721   3
  36  12   0 2169.78 410.259   6
 -36 -12   0 2365.90 428.192   4
 -36 -12   0 2110.55 434.195   5
  37  12   0 409.696 306.427   6
  37 -12   0 270.376 192.355   3
  37  12   0-177.678 222.310   3
 -37 -12   0 17.1431 267.818   5
 -37 -12   0 157.706 308.628   4
  38 -12   0 477.454 198.783   3
  38  12   0 487.216 295.165   6
 -38 -12   0 222.389 316.377   4
 -38 -12   0 293.865 279.982   5
  38  12   0 356.167 267.257   3
   0 -13   0 154.210 79.5479   5
   0  13   0 110.350 86.0497   2
   0 -13   0 482.216 172.707   4
   0  13   0 355.870 135.633   6
  -1 -13   0 251.120 102.451   5
   1  13   0 239.807 102.562   2
  -1  13   0-93.4625 99.0854   2
   1 -13   0 171.979 89.7220   5
   1  13   0 63.7685 110.708   6
  -1  13   0 167.791 118.754   6
   1 -13   0-19.7598 137.628   4
   2 -13   0 11072.8 403.958   5
   2  13   0 11294.1 480.172   2
  -2  13   0 11846.2 495.745   6
   2  13   0 11635.4 521.887   6
  -2  13   0 11781.8 475.016   2
  -2 -13   0 11397.3 463.015   5
   2 -13   0 10744.4 530.291   4
   3 -13   0-123.587 81.9192   5
  -3 -13   0 110.475 99.1794   5
  -3  13   0 82.7941 79.6422   2
  -3  13   0-118.596 108.724   6
   3  13   0-38.6824 111.005   6
   3  13   0 53.4262 81.7457   2
   4 -13   0 876.433 116.299   5
  -4  13   0 1291.36 177.845   6
   4  13   0 1131.35 179.010   6
  -4  13   0 1298.80 169.349   2
   4  13   0 1164.04 177.194   2
  -4 -13   0 1122.11 166.387   5
   5  13   0 94.8090 109.280   6
   5  13   0 79.1446 101.514   2
  -5  13   0 166.970 98.4500   2
   5 -13   0 174.390 93.7787   5
  -5 -13   0 234.274 127.705   5
  -5  13   0 63.4333 102.254   6
   6  13   0-16.4129 96.9573   6
  -6  13   0 124.806 103.107   6
   6  13   0 70.0010 93.6992   2
  -6  13   0 6.00993 69.6723   2
  -6 -13   0 84.7344 100.284   5
   6 -13   0 66.2718 72.7046   5
  -7  13   0-16.7319 85.0409   2
   7 -13   0 34.8319 61.3196   5
  -7 -13   0 46.2620 102.014   5
   7  13   0-83.7323 108.941   6
   7  13   0 112.273 118.511   2
  -7  13   0-38.3962 85.7874   6
   8 -13   0 180.228 73.1993   5
   8  13   0 171.638 127.036   2
  -8  13   0 36.6248 78.4642   2
  -8  13   0 195.912 103.954   6
   8  13   0 190.746 136.719   6
   9 -13   0 139.728 62.0462   5
   9  13   0-84.0511 127.331   2
  -9  13   0-57.6599 87.0930   2
  -9  13   0-83.0679 90.2089   6
   9  13   0-43.7154 109.384   6
  10 -13   0 11645.2 287.048   5
  10  13   0 11447.6 541.673   2
  10  13   0 11474.0 581.409   6
 -10  13   0 11544.6 439.395   6
 -10  13   0 11653.6 437.119   2
 -11  13   0-9.28334 71.2797   2
  11  13   0-32.7136 145.818   6
 -11  13   0 105.824 104.590   6
  11  13   0 198.130 151.333   2
  11 -13   0-32.9322 51.0219   5
 -11  13   0-243.612 148.881   5
 -12  13   0 29.3495 70.0979   2
 -12  13   0 62.5668 98.6068   5
  12 -13   0-22.2993 44.3987   5
  12  13   0 19.6205 136.406   6
 -12  13   0 29.4249 86.4022   6
  12  13   0-62.2628 129.941   2
 -12 -13   0 84.7281 136.529   5
 -13  13   0-61.4061 93.4717   5
  13  13   0-31.6269 168.173   6
 -13 -13   0 107.769 144.328   5
 -13 -13   0-347.981 197.971   4
  13  13   0-26.3293 127.332   2
  13 -13   0 102.115 44.8344   5
 -13  13   0 154.204 90.7723   2
 -13  13   0 23.1568 90.4636   6
 -14  13   0 280.464 112.208   6
  14 -13   0 169.292 42.6306   5
  14  13   0 147.339 130.520   3
  14  13   0 146.594 160.022   6
 -14 -13   0-99.6062 198.642   4
 -14  13   0 169.066 84.5788   2
 -14 -13   0 182.517 139.414   5
 -14  13   0 414.079 91.6188   5
  14  13   0 156.450 133.716   2
  15  13   0 191.576 152.353   3
 -15  13   0 61.5561 63.5588   5
 -15  13   0 10.8505 81.0743   2
 -15  13   0 100.129 100.721   6
 -15 -13   0 224.537 202.842   4
  15 -13   0 5.76501 27.5115   5
 -15 -13   0-211.553 151.610   5
  15  13   0-124.124 145.533   2
  15  13   0 106.505 174.947   6
  16  13   0 383.710 162.981   3
 -16 -13   0 635.613 198.228   5
  16  13   0 513.667 185.076   2
 -16 -13   0 180.546 172.439   4
 -16  13   0 418.220 112.344   6
  16  13   0 375.848 201.602   6
 -16  13   0 383.966 97.4714   2
 -17 -13   0 54.6106 146.446   5
 -17 -13   0-381.620 218.534   4
  17  13   0-0.88286 135.424   3
  17  13   0 222.614 170.154   2
 -17  13   0-82.6774 95.6764   6
 -17  13   0-37.0155 73.8755   2
  17  13   0-22.0131 172.288   6
 -18 -13   0 5935.06 466.065   5
 -18  13   0 5709.88 292.752   2
  18  13   0 6225.90 443.782   2
  18  13   0 6010.47 433.301   3
  18  13   0 6249.88 489.160   6
 -18 -13   0 5828.28 486.753   4
 -18  13   0 5652.16 279.532   6
 -19  13   0-76.5795 99.4988   6
 -19 -13   0 255.095 201.490   4
  19  13   0-150.991 149.839   2
 -19  13   0 59.9823 85.5183   2
 -19 -13   0-134.275 170.901   5
  19  13   0-174.105 195.975   6
  19  13   0-21.5279 135.200   3
 -20 -13   0 1219.50 270.740   5
 -20 -13   0 1436.70 294.572   4
  20  13   0 1483.85 286.324   6
  20  13   0 1507.35 254.719   2
 -20  13   0 1291.07 152.243   2
 -20  13   0 1332.07 161.745   6
  20  13   0 1349.58 235.340   3
  21  13   0 49.0409 150.202   2
 -21 -13   0-116.562 180.951   4
 -21  13   0-17.0671 87.7602   2
  21  13   0-7.97880 138.257   3
  21  13   0-77.8111 180.321   6
 -21  13   0 148.844 106.405   6
 -21 -13   0-14.2216 178.530   5
  22  13   0 2598.31 323.589   2
  22  13   0 2480.58 352.176   6
  22  13   0 2177.80 298.779   3
 -22  13   0 2608.14 201.323   6
 -22 -13   0 2454.89 352.073   5
 -22 -13   0 2458.91 354.237   4
 -22  13   0 2566.70 215.363   2
  23  13   0-68.4690 167.110   2
 -23  13   0 199.139 114.744   6
  23  13   0-65.3598 200.851   6
 -23 -13   0 221.249 199.543   4
 -23 -13   0 241.543 209.064   5
  23  13   0 354.510 194.673   3
 -23  13   0 10.1715 101.147   2
  24  13   0 947.707 234.079   2
 -24  13   0 845.807 147.628   6
 -24  13   0 675.018 139.722   2
  24  13   0 1006.55 269.446   6
  24  13   0 346.196 169.329   3
 -24 -13   0 775.870 259.220   4
 -24 -13   0 638.631 234.306   5
  25  13   0-84.5453 207.372   6
 -25  13   0-31.6430 108.681   2
 -25 -13   0 103.200 191.891   5
  25  13   0-167.327 190.902   2
 -25 -13   0-380.643 255.589   4
  25  13   0 257.841 193.083   3
 -25  13   0-168.376 134.142   6
 -26 -13   0 3331.77 412.249   5
  26  13   0 2847.14 347.225   3
  26  13   0 4070.28 428.043   2
 -26 -13   0 3164.36 414.612   4
  26  13   0 3268.97 411.811   6
 -26  13   0 3018.72 242.030   2
 -27  13   0 190.622 123.429   2
  27  13   0-77.3976 164.774   3
 -27 -13   0 93.4143 219.455   4
  27  13   0-56.2762 177.834   2
  27  13   0 315.843 237.809   6
 -27 -13   0-205.072 244.872   5
  28  13   0 671.939 258.462   6
 -28 -13   0 257.090 224.231   4
  28  13   0 854.850 239.004   3
 -28  13   0 928.786 165.514   2
  28  13   0 951.784 254.276   2
 -28 -13   0 1246.02 291.510   5
  29  13   0 269.301 264.532   6
 -29 -13   0 93.0478 223.036   5
  29  13   0-146.198 202.837   2
  29  13   0-252.255 208.681   3
 -29  13   0 36.1878 121.532   2
 -29 -13   0 331.197 252.984   4
  30  13   0 121.086 238.133   6
  30  13   0 196.125 190.974   3
  30  13   0 351.659 221.361   2
 -30 -13   0 53.2342 219.685   4
 -30 -13   0-236.414 229.934   5
  31  13   0-24.6741 183.136   3
  31  13   0 225.762 254.383   6
 -31 -13   0 258.102 226.348   4
 -31 -13   0-309.534 232.694   5
  31  13   0-48.0790 182.058   2
  32  13   0 1682.17 314.151   2
  32  13   0 1662.05 306.099   3
 -32 -13   0 2767.76 437.174   4
 -32 -13   0 1829.19 370.091   5
  32  13   0 2312.84 400.151   6
  33  13   0 112.999 203.137   3
 -33 -13   0 575.027 312.454   5
  33  13   0-27.5078 255.896   6
  33  13   0 276.823 235.863   2
 -33 -13   0 724.783 303.573   4
  34  13   0 3582.94 427.736   2
  34  13   0 3526.10 429.859   3
 -34 -13   0 3861.22 498.975   4
 -34 -13   0 3156.50 461.666   5
  34  13   0 3342.17 455.354   6
  35  13   0 12.6731 198.770   3
  35  13   0 182.090 210.420   2
  35  13   0 316.851 277.567   6
 -35 -13   0-88.2733 308.485   4
 -35 -13   0 139.813 267.381   5
  35 -13   0-69.5182 172.199   3
 -36 -13   0 1140.05 383.282   4
  36  13   0 2037.15 403.957   6
 -36 -13   0 1816.28 421.860   5
  36  13   0 1885.46 348.544   3
  36 -13   0 1586.80 272.860   3
  37  13   0-30.2278 235.301   3
  37 -13   0 133.936 177.512   3
 -37 -13   0 221.112 271.015   5
 -37 -13   0 219.376 323.953   4
  37  13   0 124.135 287.337   6
   0  14   0 283.544 117.915   2
   0  14   0 227.183 128.529   6
   0 -14   0 153.456 80.1031   5
  -1  14   0-72.9007 87.1874   2
  -1  14   0 78.5232 110.106   6
  -1 -14   0-85.0418 83.7382   5
   1  14   0 21.5532 86.8682   2
   1  14   0 194.399 139.295   6
   1 -14   0-44.9852 85.2543   5
   2  14   0 574.718 149.870   6
   2 -14   0 646.900 125.903   5
  -2 -14   0 504.190 133.997   5
  -2  14   0 595.021 161.942   6
  -2  14   0 713.439 149.095   2
   2  14   0 660.593 156.203   2
   3  14   0 146.525 129.039   2
  -3  14   0 100.972 112.905   6
   3 -14   0 155.668 99.9000   5
   3  14   0-6.36084 116.562   6
  -3  14   0-25.5716 81.8758   2
  -3 -14   0 18.5737 96.3039   5
   4  14   0 23889.8 738.838   2
   4 -14   0 24573.2 586.169   5
  -4 -14   0 24137.0 906.545   4
  -4  14   0 24863.9 714.040   2
  -4 -14   0 23684.3 717.917   5
   4  14   0 24444.3 803.886   6
  -4  14   0 25123.5 737.388   6
  -5  14   0 86.1996 101.497   6
  -5  14   0 47.7252 94.4200   2
   5 -14   0 256.403 96.2493   5
  -5 -14   0 109.749 123.701   5
   5  14   0 209.989 134.746   6
   5  14   0-13.7556 117.654   2
  -5 -14   0 297.123 190.030   4
  -6  14   0 137.929 111.814   6
   6  14   0 272.264 172.481   6
   6  14   0 115.237 138.916   2
  -6  14   0 198.921 93.5731   2
   6 -14   0 75.5139 65.3201   5
  -6 -14   0 160.402 197.454   4
   7  14   0 272.718 145.652   2
   7 -14   0 252.548 82.2763   5
  -7  14   0 148.409 97.3774   2
  -7  14   0 199.893 111.874   6
   7  14   0 221.362 148.036   6
  -7 -14   0 347.299 196.794   4
   8  14   0 9402.65 534.878   6
   8 -14   0 9668.74 312.240   5
  -8  14   0 10070.6 446.798   6
   8  14   0 10077.4 521.034   2
  -8  14   0 9530.48 424.104   2
  -8 -14   0 10383.0 645.134   4
  -9 -14   0 595.358 252.333   4
  -9  14   0 94.5478 109.787   6
   9  14   0 40.5916 130.626   6
   9  14   0 5.21719 119.465   2
  -9  14   0 111.307 93.1973   2
   9 -14   0 141.770 75.5317   5
 -10  14   0 685.999 135.026   2
  10 -14   0 857.506 102.484   5
 -10 -14   0 571.747 223.282   4
  10  14   0 507.736 165.037   2
 -10  14   0 754.233 150.531   6
  10  14   0 860.844 219.515   6
 -11 -14   0 217.942 215.688   4
  11  14   0 202.691 151.313   2
  11  14   0-39.4573 157.712   6
 -11  14   0-50.9237 84.6369   2
 -11  14   0-13.5486 103.807   6
 -11 -14   0 125.795 138.886   5
  11 -14   0 58.0497 53.3586   5
 -12 -14   0 1149.78 274.136   4
  12  14   0 781.832 217.306   6
  12 -14   0 772.299 82.4189   5
 -12  14   0 600.004 113.624   2
  12  14   0 1018.67 212.414   2
 -12 -14   0 697.517 180.553   5
 -12  14   0 709.728 152.170   6
 -12  14   0 4.13134 156.291   5
 -13  14   0-40.0924 81.6363   2
 -13 -14   0 282.618 190.790   4
  13  14   0-3.62716 179.481   6
  13  14   0-173.800 173.384   2
 -13  14   0 99.0870 108.592   5
  13 -14   0-57.8768 49.5555   5
 -13 -14   0-18.9468 151.827   5
 -13  14   0 117.782 123.318   6
 -14 -14   0 256.402 163.427   5
 -14  14   0 87.3665 79.0085   2
 -14  14   0 114.171 96.5889   6
  14 -14   0 163.865 53.8950   5
  14  14   0-81.7191 142.689   3
 -14  14   0 307.994 105.630   5
  14  14   0 279.994 198.017   6
 -14 -14   0-214.759 197.329   4
  14  14   0 59.0532 130.681   2
 -15 -14   0 80.2844 162.800   5
  15  14   0-30.6000 172.343   6
  15  14   0 140.459 156.992   2
  15  14   0 257.840 154.423   3
  15 -14   0-40.7082 35.9373   5
 -15  14   0 18.2709 78.6658   2
 -15  14   0-234.674 90.9678   5
 -15  14   0 25.1547 103.625   6
 -15 -14   0-277.123 211.432   4
 -16 -14   0-70.8235 201.382   4
  16  14   0 186.281 187.707   6
 -16  14   0 81.6193 79.0125   2
  16  14   0 54.9022 148.425   3
  16  14   0-47.2181 140.087   2
 -16 -14   0-24.9190 151.534   5
 -16  14   0 12.2985 116.213   6
  17  14   0 316.752 217.259   6
  17  14   0 332.576 184.695   3
 -17  14   0 112.594 89.4479   2
  17  14   0 440.926 193.859   2
 -17  14   0 288.419 121.093   6
 -17 -14   0 53.9644 194.981   4
 -17 -14   0 198.212 185.131   5
  18  14   0 755.351 232.191   6
  18  14   0 650.301 203.243   2
 -18  14   0 691.055 133.903   2
 -18 -14   0 314.308 171.794   5
 -18 -14   0 561.277 226.327   4
  18  14   0 630.211 188.231   3
 -18  14   0 650.597 141.570   6
  19  14   0-40.2217 171.409   2
  19  14   0-14.6698 190.101   6
 -19  14   0-23.5905 82.2903   2
 -19  14   0-49.3729 105.544   6
 -19 -14   0 17.8161 201.298   4
  19  14   0 129.476 134.981   3
 -19 -14   0-0.18794 186.146   5
 -20 -14   0 553.254 240.891   4
 -20  14   0 232.030 122.286   6
 -20 -14   0-7.34103 182.013   5
  20  14   0 286.854 178.923   2
 -20  14   0 152.361 96.8730   2
  20  14   0 227.823 182.005   6
  20  14   0 261.185 168.086   3
  21  14   0 60.4106 162.429   3
 -21 -14   0 205.763 208.881   4
  21  14   0 235.563 174.548   2
 -21 -14   0-12.9814 180.153   5
 -21  14   0 54.5368 92.8253   2
  21  14   0 41.7293 190.827   6
 -21  14   0 44.1614 103.038   6
 -22 -14   0 150.786 209.304   4
 -22  14   0 623.993 132.534   2
 -22 -14   0 791.297 258.842   5
 -22  14   0 614.704 143.834   6
  22  14   0 752.863 237.399   6
  22  14   0 866.147 229.631   3
  22  14   0 545.444 205.411   2
  23  14   0 129.299 214.933   6
 -23  14   0 146.297 118.176   2
 -23 -14   0 137.470 213.584   4
  23  14   0 18.1100 160.141   3
 -23  14   0 40.3833 114.601   6
 -23 -14   0-86.3725 210.107   5
  23  14   0-279.219 192.758   2
  24  14   0 3412.36 421.321   6
 -24 -14   0 3128.55 396.476   5
 -24 -14   0 3185.75 425.204   4
  24  14   0 3464.99 385.171   2
 -24  14   0 3408.09 253.607   2
  24  14   0 3814.20 399.456   3
  25  14   0-164.827 183.277   3
  25  14   0 118.432 222.779   6
  25  14   0 377.980 221.511   2
 -25  14   0 69.0567 118.196   2
 -25 -14   0 50.1370 215.342   5
 -25 -14   0 334.318 248.675   4
  26  14   0 4646.44 486.232   6
 -26 -14   0 3973.03 450.219   5
  26  14   0 5076.15 473.802   2
 -26  14   0 4617.73 300.949   2
  26  14   0 4989.28 458.988   3
 -26 -14   0 4260.67 477.285   4
  27  14   0-80.4996 216.146   6
 -27 -14   0-88.4024 239.274   4
 -27  14   0-17.2655 129.714   2
  27  14   0-120.086 201.907   2
 -27 -14   0-66.8747 219.821   5
  27  14   0-92.2269 197.270   3
 -28 -14   0 3398.31 456.143   4
 -28  14   0 2418.03 237.245   2
  28  14   0 2817.64 418.571   6
  28  14   0 2707.45 368.506   2
 -28 -14   0 2547.83 400.986   5
  28  14   0 2386.04 347.036   3
 -29 -14   0-245.309 254.351   4
 -29 -14   0 13.8830 245.816   5
  29  14   0-290.521 212.440   2
  29  14   0-44.6752 188.846   3
  29  14   0-24.6950 234.542   6
  30  14   0 1514.24 305.958   3
  30  14   0 1126.09 309.511   6
 -30 -14   0 1759.44 372.328   4
  30  14   0 1809.32 324.979   2
 -30 -14   0 1669.44 336.179   5
  31  14   0-247.733 224.239   2
 -31 -14   0-194.887 232.162   5
 -31 -14   0 434.278 285.331   4
  31  14   0-48.6177 195.850   3
  31  14   0-97.6876 249.780   6
  32  14   0 219.079 239.859   2
 -32 -14   0-307.395 249.864   5
 -32 -14   0 497.010 282.632   4
  32  14   0 189.188 209.651   3
  32  14   0 182.082 237.900   6
  33  14   0-132.817 208.959   2
  33  14   0-188.599 218.714   3
  33  14   0-551.515 302.804   6
 -33 -14   0 461.529 271.674   5
 -33 -14   0 390.236 318.868   4
 -34 -14   0 273.686 265.142   5
  34  14   0 621.444 324.438   6
 -34 -14   0 397.530 279.186   4
  34  14   0-65.5675 202.844   3
  34  14   0 127.595 228.165   2
 -35 -14   0 626.675 348.099   5
 -35 -14   0-216.044 292.694   4
  35  14   0 365.363 252.648   3
  35  14   0-17.8254 250.964   6
  35  14   0 241.896 227.572   2
   0 -15   0 308.951 107.586   5
   0  15   0 160.751 108.492   2
   0  15   0 96.2792 127.296   6
  -1 -15   0-120.336 104.401   5
   1  15   0-11.7562 98.6976   2
   1 -15   0-0.27540 95.8369   5
  -1 -15   0-217.743 191.111   4
   1  15   0 154.501 134.588   6
  -1  15   0 27.5562 119.678   6
  -1  15   0-169.452 127.968   2
  -2  15   0 10139.5 482.455   2
  -2 -15   0 12132.0 506.816   5
  -2 -15   0 11881.5 645.886   4
   2  15   0 12497.6 550.096   2
  -2  15   0 12510.4 563.351   6
   2 -15   0 12460.4 461.509   5
   2  15   0 12386.2 592.320   6
  -3 -15   0 250.501 180.147   4
  -3 -15   0 253.320 133.426   5
   3  15   0 682.291 197.131   6
  -3  15   0 342.270 145.091   6
   3 -15   0 237.874 99.3202   5
  -3  15   0 574.817 163.568   2
   3  15   0 318.129 134.413   2
  -4  15   0 1201.24 192.607   2
  -4 -15   0 797.222 177.099   5
   4 -15   0 866.443 130.541   5
  -4  15   0 832.997 169.941   6
   4  15   0 994.612 193.606   2
  -4 -15   0 943.951 242.616   4
   4  15   0 907.501 211.136   6
   5 -15   0 37.2187 77.2424   5
   5  15   0-138.666 136.589   6
   5  15   0 69.5046 133.877   2
  -5  15   0 37.4745 118.480   6
  -5  15   0 86.0810 107.449   2
  -5 -15   0 167.584 177.734   4
   6  15   0 8394.80 517.853   6
   6 -15   0 8861.52 351.890   5
  -6  15   0 8937.88 444.923   2
   6  15   0 9079.48 497.167   2
  -6 -15   0 8879.05 597.932   4
  -6  15   0 8743.84 452.078   6
   7  15   0-123.231 142.780   2
  -7  15   0-22.4707 93.6078   2
   7 -15   0 67.7003 84.0546   5
   7  15   0 158.974 138.677   6
  -7  15   0-62.9194 126.734   6
  -7 -15   0-185.065 205.799   4
   8 -15   0 1776.41 156.607   5
  -8  15   0 1213.06 189.777   6
  -8  15   0 1515.43 191.982   2
   8  15   0 1656.77 242.474   2
   8  15   0 1144.76 234.831   6
  -8 -15   0 1568.71 313.386   4
  -9 -15   0 101.684 145.793   5
  -9  15   0-19.3687 84.2691   2
   9  15   0 181.884 141.955   2
   9 -15   0 149.337 79.9093   5
   9  15   0 198.901 169.765   6
  -9 -15   0 79.9720 201.881   4
  -9  15   0 100.809 127.183   6
 -10 -15   0 1155.65 228.458   5
 -10 -15   0 1337.59 309.385   4
  10  15   0 1274.45 258.616   6
  10 -15   0 958.671 108.494   5
 -10  15   0 874.355 158.145   6
  10  15   0 1030.75 210.299   2
 -10  15   0 869.560 158.410   2
 -11 -15   0 386.616 248.948   4
 -11  15   0 312.238 134.313   6
  11  15   0-7.33528 181.247   6
 -11 -15   0 89.9026 145.406   5
 -11  15   0 151.530 111.932   2
  11 -15   0 248.354 79.6898   5
  11  15   0 287.321 172.777   2
 -12 -15   0 1545.27 250.150   5
 -12 -15   0 1817.22 352.751   4
  12  15   0 2187.62 327.122   6
  12 -15   0 2001.98 132.552   5
 -12  15   0 1844.25 211.939   6
  12  15   0 1958.02 268.697   2
 -12  15   0 2215.50 225.032   2
  13  15   0 249.035 211.632   6
 -13 -15   0 208.080 174.267   5
  13 -15   0-16.7797 57.7947   5
  13  15   0 77.1405 157.951   2
 -13  15   0 28.0395 109.343   6
 -13  15   0-25.5608 98.0947   2
 -13 -15   0 242.195 223.109   4
  14  15   0-37.6180 148.411   3
 -14  15   0 241.191 134.673   6
  14 -15   0-112.928 63.8921   5
  14  15   0-106.545 154.537   2
 -14 -15   0-27.0845 160.422   5
 -14  15   0 347.321 131.771   2
 -14 -15   0 41.3331 205.880   4
  14  15   0 499.533 246.928   6
  15  15   0-301.382 220.250   6
 -15 -15   0 98.5427 152.067   5
  15  15   0 103.951 152.277   2
 -15  15   0-59.2098 136.452   6
 -15  15   0 13.5707 91.6060   2
 -15 -15   0-515.642 269.603   4
  15  15   0 89.0517 144.828   3
 -16 -15   0-105.430 239.841   4
  16  15   0 482.221 195.827   3
 -16  15   0 142.241 109.977   2
 -16 -15   0 209.235 175.667   5
 -16  15   0 107.567 126.853   6
  16  15   0-125.518 176.174   2
  16  15   0 394.072 227.334   6
 -17 -15   0 729.446 268.493   4
  17  15   0 211.698 163.729   3
 -17 -15   0 279.144 207.571   5
 -17  15   0-64.0587 131.846   6
 -17  15   0 48.4626 96.2550   2
  17  15   0 232.103 182.992   2
  17  15   0 54.8944 195.893   6
 -18 -15   0 2233.72 379.070   4
  18  15   0 2237.61 307.131   3
  18  15   0 2563.72 363.565   6
 -18  15   0 2370.27 226.534   2
  18  15   0 2464.58 322.669   2
 -18  15   0 2155.76 231.065   6
 -18 -15   0 2077.83 321.260   5
  19  15   0 35.0403 169.019   2
 -19  15   0-49.6851 137.691   6
 -19 -15   0-150.523 228.894   4
  19  15   0 22.7975 146.418   3
  19  15   0 395.724 237.152   6
 -19 -15   0 195.806 198.535   5
 -19  15   0 146.887 107.038   2
 -20 -15   0 1861.47 342.682   4
  20  15   0 1819.58 327.560   6
 -20 -15   0 1773.25 314.409   5
  20  15   0 1584.84 285.206   2
 -20  15   0 1548.11 202.041   6
 -20  15   0 1759.20 203.922   2
  20  15   0 1621.20 285.767   3
  21  15   0 185.898 177.448   3
 -21 -15   0 340.549 229.787   5
 -21  15   0-37.2351 110.325   2
 -21 -15   0 32.2155 235.444   4
  21  15   0 47.6885 163.896   2
  21  15   0-54.5153 219.900   6
 -21  15   0 22.5255 126.264   6
  22  15   0 2702.42 385.275   6
  22  15   0 1985.93 306.467   2
 -22  15   0 2097.55 217.796   2
 -22  15   0 1575.74 200.452   6
 -22 -15   0 1764.18 346.259   4
  22  15   0 2162.73 310.412   3
 -22 -15   0 1553.10 315.814   5
 -23 -15   0 282.317 256.401   4
  23  15   0 378.773 218.246   2
 -23  15   0 166.056 116.551   2
  23  15   0 82.0660 187.940   6
 -23 -15   0 323.933 243.011   5
  23  15   0 105.548 168.332   3
  24  15   0 480.063 241.007   6
 -24 -15   0 941.131 322.124   4
 -24  15   0 424.335 144.124   2
  24  15   0 366.886 179.589   3
  24  15   0 370.038 189.724   2
 -24 -15   0 394.466 226.742   5
 -25 -15   0-326.290 258.463   4
  25  15   0-193.193 219.463   6
  25  15   0 42.2240 184.868   3
 -25 -15   0 107.734 222.752   5
 -25  15   0-70.3340 122.417   2
  25  15   0 122.853 195.135   2
 -26  15   0-28.2402 121.849   2
 -26 -15   0 179.200 234.194   5
 -26 -15   0 394.465 286.841   4
  26  15   0 86.5066 214.789   6
  26  15   0-238.313 207.974   2
  26  15   0-224.539 201.722   3
 -27 -15   0-109.139 249.961   4
  27  15   0 436.112 224.633   3
 -27  15   0-304.596 162.871   2
  27  15   0-140.938 252.042   6
  27  15   0 103.029 220.949   2
 -27 -15   0 150.801 221.109   5
  28  15   0 1117.75 340.489   6
  28  15   0 761.081 252.268   3
  28  15   0 527.223 228.884   2
 -28 -15   0 1041.65 325.554   4
 -28 -15   0 745.798 289.926   5
 -29 -15   0 62.8801 234.312   5
 -29 -15   0-313.367 296.093   4
  29  15   0-85.8017 219.069   2
  29  15   0 61.0147 196.600   3
  29  15   0-246.187 253.524   6
  30  15   0 37.0120 212.375   2
  30  15   0 632.005 249.269   3
 -30 -15   0 645.509 294.527   5
  30  15   0 375.954 286.948   6
 -30 -15   0-293.623 298.900   4
 -31 -15   0-200.671 243.213   5
  31  15   0 104.859 227.659   6
  31  15   0-92.9334 191.260   2
  31  15   0-261.675 215.904   3
 -31 -15   0 323.441 285.831   4
  32  15   0 54.6088 238.028   6
 -32 -15   0 425.080 303.590   5
  32  15   0 98.5626 201.165   2
  32  15   0 314.198 213.219   3
 -32 -15   0-200.407 259.976   4
  33  15   0 337.085 265.138   2
 -33 -15   0-127.173 263.510   4
  33  15   0 116.284 208.100   3
 -33 -15   0 178.704 281.665   5
  33  15   0-145.861 241.121   6
 -34 -15   0 3413.29 521.116   4
  34  15   0 2862.01 443.746   6
  34  15   0 2390.42 375.025   2
 -34 -15   0 2974.96 475.878   5
  34  15   0 2231.58 368.004   3
   0 -16   0 1652.63 285.963   4
   0  16   0 2393.85 267.737   2
   0 -16   0 2289.63 228.692   5
   0  16   0 2868.05 322.605   6
   1  16   0-209.644 162.502   6
  -1  16   0-85.0111 159.402   6
  -1  16   0-132.411 120.012   2
   1  16   0-238.730 158.456   2
   1 -16   0 123.713 195.224   4
  -1 -16   0-164.771 111.301   5
   1 -16   0-54.4058 94.7013   5
  -1 -16   0-62.8989 171.940   4
  -2  16   0 3425.48 307.621   2
   2  16   0 3564.43 326.403   2
   2  16   0 3059.81 316.266   6
  -2 -16   0 3068.62 356.705   4
   2 -16   0 3238.68 253.196   5
  -2  16   0 3866.88 344.791   6
  -2 -16   0 3379.10 282.257   5
  -3  16   0 96.6100 130.666   2
   3  16   0-22.9471 154.951   6
  -3  16   0-96.4623 137.605   6
   3  16   0-113.872 151.901   2
   3 -16   0-81.2000 82.1693   5
  -3 -16   0 301.034 209.579   4
  -4 -16   0 2504.59 348.364   4
  -4  16   0 2073.93 261.132   6
   4  16   0 1748.20 268.786   6
  -4  16   0 1879.86 229.991   2
   4 -16   0 2153.01 207.118   5
   4  16   0 2057.06 257.871   2
  -5 -16   0-108.847 184.150   4
   5  16   0-302.526 179.983   6
  -5  16   0-23.2462 118.370   6
   5 -16   0 249.019 105.905   5
   5  16   0-67.0118 149.261   2
  -5  16   0 79.9041 103.966   2
  -6  16   0 2314.05 264.212   2
   6  16   0 2518.99 331.278   6
  -6 -16   0 2438.66 353.268   4
   6 -16   0 2400.81 204.186   5
  -6  16   0 2224.06 260.852   6
   6  16   0 2517.31 292.912   2
  -7 -16   0 47.5940 138.406   5
   7 -16   0 363.885 115.142   5
  -7  16   0 14.9401 146.359   6
   7  16   0 206.394 158.173   2
  -7  16   0-44.3039 119.936   2
  -7 -16   0 265.586 211.685   4
   7  16   0 122.405 164.764   6
  -8 -16   0 9006.49 637.556   4
  -8  16   0 7923.98 434.753   2
   8  16   0 8419.04 508.759   2
   8  16   0 8400.87 559.960   6
  -8 -16   0 7778.91 481.984   5
  -8  16   0 8515.80 460.550   6
   8 -16   0 8713.63 334.938   5
  -9  16   0 156.652 139.514   6
   9  16   0 82.9712 177.195   6
  -9  16   0 466.939 157.917   2
  -9 -16   0 301.654 258.432   4
   9 -16   0 206.335 104.130   5
   9  16   0 193.487 159.709   2
  -9 -16   0 224.442 165.358   5
 -10 -16   0 56.3517 217.396   4
  10  16   0-116.806 173.409   2
 -10 -16   0 25.4197 156.804   5
  10  16   0-117.251 176.985   6
 -10  16   0 385.250 168.149   6
 -10  16   0 93.0361 131.679   2
  10 -16   0 47.9121 78.1068   5
  11  16   0-62.5993 147.701   2
  11  16   0 228.868 199.613   6
  11 -16   0-21.0388 78.8961   5
 -11 -16   0-54.0164 165.224   5
 -11  16   0-1.18217 120.747   6
 -11 -16   0 54.0600 219.330   4
 -11  16   0 463.022 166.664   2
  12  16   0 3446.97 348.661   2
 -12  16   0 3304.71 287.923   6
 -12 -16   0 3584.53 364.555   5
  12 -16   0 3211.92 177.517   5
 -12  16   0 3910.48 313.682   2
  12  16   0 4216.55 441.384   6
 -12 -16   0 3597.96 454.674   4
 -13  16   0-45.3428 127.506   6
  13  16   0-86.6904 147.780   2
 -13  16   0 224.138 148.345   2
 -13 -16   0 43.4799 170.575   5
  13  16   0 61.0581 216.848   6
 -13 -16   0-195.786 267.489   4
 -14  16   0 112.332 112.241   2
 -14  16   0 197.008 145.279   6
  14  16   0 107.352 164.615   2
  14  16   0 196.734 171.143   3
  14  16   0-71.0109 193.942   6
 -14 -16   0 79.2944 160.602   5
 -15 -16   0-231.205 242.550   4
 -15  16   0 49.6373 135.761   6
  15  16   0-88.4863 149.194   2
  15  16   0-337.610 237.279   6
  15  16   0 156.897 158.602   3
 -15  16   0 248.605 143.094   2
 -15 -16   0 90.1992 175.090   5
 -16 -16   0 2974.69 355.898   5
 -16  16   0 2954.03 272.132   6
  16  16   0 3094.71 349.656   2
 -16 -16   0 2291.68 375.691   4
 -16  16   0 2904.61 265.288   2
  16  16   0 3151.24 404.012   6
  16  16   0 2972.02 351.493   3
 -17  16   0 115.934 149.438   6
 -17  16   0-202.290 139.016   2
  17  16   0-272.889 201.227   2
  17  16   0-100.520 203.202   6
 -17 -16   0-709.677 302.341   4
 -17 -16   0-172.579 182.421   5
  17  16   0 15.3905 155.354   3
 -18 -16   0 3926.63 479.727   4
 -18  16   0 3671.99 296.007   2
  18  16   0 3508.05 420.627   6
  18  16   0 3654.91 376.217   2
 -18  16   0 3761.88 303.573   6
  18  16   0 3401.29 374.196   3
 -18 -16   0 3263.46 387.125   5
 -19 -16   0 178.078 222.951   5
 -19  16   0 263.042 159.083   6
 -19  16   0 80.0223 145.748   2
  19  16   0 72.3155 153.246   3
 -19 -16   0-328.250 266.862   4
  19  16   0-99.5285 205.332   6
  19  16   0 153.598 168.176   2
  20  16   0 1655.79 330.485   6
 -20  16   0 1080.94 197.648   6
  20  16   0 1564.99 294.571   2
  20  16   0 1460.70 272.006   3
 -20 -16   0 1423.36 300.055   5
 -20 -16   0 740.072 283.796   4
 -20  16   0 1448.24 216.097   2
  21  16   0-121.884 232.498   6
 -21 -16   0 107.290 256.432   4
  21  16   0 132.082 203.505   2
  21  16   0 179.756 176.575   3
 -21  16   0-85.4166 134.643   2
 -21 -16   0 354.117 246.372   5
 -22 -16   0 45.0204 235.379   4
 -22  16   0 203.315 154.145   2
  22  16   0-264.155 186.752   2
  22  16   0-89.2273 181.846   3
  22  16   0 27.9575 219.780   6
 -22 -16   0-121.973 197.787   5
 -23 -16   0 136.464 263.421   4
  23  16   0-1.69230 169.468   3
 -23 -16   0 60.1040 201.858   5
 -23  16   0 204.582 149.099   2
  23  16   0-359.023 253.481   6
  23  16   0 187.151 218.844   2
  24  16   0 443.291 228.938   3
 -24  16   0 333.079 154.044   2
  24  16   0 251.746 216.859   6
 -24 -16   0 42.3722 249.376   4
 -24 -16   0 45.5554 204.108   5
  24  16   0 193.377 193.094   2
  25  16   0-205.107 243.046   6
  25  16   0 135.880 210.274   3
  25  16   0-20.9127 184.112   2
 -25 -16   0 208.938 251.487   5
 -25 -16   0-477.249 290.617   4
 -25  16   0-56.8999 143.445   2
 -26 -16   0 154.193 238.517   5
  26  16   0-18.5051 241.051   6
  26  16   0 82.1485 173.392   3
  26  16   0 13.3295 194.011   2
 -26 -16   0 285.815 299.971   4
  27  16   0 234.934 236.768   6
  27  16   0 71.1742 206.124   3
 -27 -16   0 309.607 267.315   5
  27  16   0-10.8809 215.617   2
 -27 -16   0 99.0989 279.758   4
  28  16   0 1467.25 337.729   2
 -28 -16   0 714.351 291.251   5
 -28 -16   0 1183.82 361.037   4
  28  16   0 436.380 245.232   6
  28  16   0 1067.03 293.198   3
 -29 -16   0 376.461 286.743   5
  29  16   0 114.053 206.687   2
  29  16   0-189.037 268.552   6
  29  16   0 53.8860 188.859   3
 -29 -16   0-309.260 317.227   4
  30  16   0 1110.42 281.868   2
  30  16   0 1513.92 325.619   3
 -30 -16   0 1945.78 434.316   4
  30  16   0 1546.38 354.589   6
 -30 -16   0 1877.40 392.206   5
 -31 -16   0-225.294 263.131   5
 -31 -16   0 181.552 329.225   4
  31  16   0 445.216 246.636   3
  31  16   0-176.171 243.532   2
  31  16   0 94.0615 268.768   6
  32  16   0 757.249 282.796   2
 -32 -16   0 1321.57 395.797   4
 -32 -16   0 1083.80 362.329   5
  32  16   0 1124.65 304.129   3
  32  16   0 915.183 313.912   6
  33  16   0 33.1254 221.103   3
 -33 -16   0-410.591 318.564   5
  33  16   0 147.045 225.602   2
  33  16   0-293.053 293.079   6
 -33 -16   0 66.1054 283.870   4
   0 -17   0 164.874 109.162   5
   0  17   0 161.918 168.733   6
   0 -17   0 280.053 198.227   4
   0  17   0 222.963 164.079   2
  -1  17   0-79.5813 149.470   2
  -1  17   0-250.607 188.370   6
  -1 -17   0 25.1085 185.079   4
   1  17   0 461.307 180.558   6
   1  17   0 37.8956 145.775   2
   1 -17   0-25.4924 100.362   5
  -2  17   0 325.460 171.688   6
  -2 -17   0 166.255 186.911   4
  -2  17   0 633.044 187.174   2
   2  17   0 426.941 184.168   2
   2  17   0 390.034 194.980   6
   2 -17   0 402.552 124.942   5
   3 -17   0 72.9516 101.571   5
   3  17   0-80.8859 143.720   2
  -3 -17   0-13.8574 202.377   4
   3  17   0-95.0644 149.652   6
  -3  17   0 107.101 132.213   2
   4  17   0 205.525 170.309   2
  -4  17   0 28.0339 127.311   2
  -4 -17   0-121.510 200.344   4
   4  17   0-34.0680 165.275   6
  -4  17   0 178.367 168.161   6
   4 -17   0-33.3684 104.597   5
  -5  17   0-151.009 173.546   6
  -5 -17   0-216.736 163.659   5
   5  17   0 41.0051 172.011   6
   5 -17   0 125.663 108.378   5
  -5 -17   0 101.640 198.079   4
  -5  17   0-63.5036 115.949   2
   5  17   0-0.80104 138.278   2
  -6  17   0-47.3008 149.336   6
  -6 -17   0 97.9551 146.538   5
   6  17   0 270.090 175.413   2
   6 -17   0 278.685 114.323   5
  -6 -17   0 1.76166 192.087   4
  -6  17   0 100.161 123.662   2
   7 -17   0-60.2800 102.242   5
   7  17   0 414.153 204.010   2
  -7 -17   0 300.014 187.289   5
   7  17   0 302.862 211.724   6
  -7  17   0 69.2347 154.466   6
  -7 -17   0 120.016 198.340   4
  -7  17   0 193.666 152.460   2
  -8 -17   0 923.570 294.722   4
  -8  17   0 1282.64 224.640   6
   8  17   0 1161.09 263.145   6
  -8 -17   0 901.350 225.891   5
   8 -17   0 1038.95 153.108   5
   8  17   0 999.909 220.746   2
  -8  17   0 1002.06 203.212   2
  -9 -17   0-296.329 219.301   4
   9  17   0 344.475 200.022   2
   9  17   0-70.0989 217.542   6
  -9  17   0 48.4815 146.382   6
   9 -17   0 141.184 100.846   5
  -9  17   0 174.886 143.363   2
  -9 -17   0-89.2155 180.720   5
 -10  17   0 1682.23 238.546   2
 -10 -17   0 1391.59 254.443   5
 -10  17   0 1731.24 239.050   6
 -10 -17   0 2481.33 392.800   4
  10  17   0 1634.66 276.827   2
  10 -17   0 1405.52 154.599   5
  10  17   0 1482.51 297.937   6
 -11 -17   0 33.5138 217.235   4
  11  17   0-53.3355 201.910   6
 -11  17   0 88.8698 148.202   2
  11 -17   0 630.323 157.018   5
 -11  17   0 351.480 176.310   6
 -11 -17   0 172.939 197.077   5
  11  17   0-155.855 159.524   2
 -12 -17   0 246.777 241.347   4
  12  17   0 122.696 161.563   2
 -12 -17   0 406.202 199.432   5
 -12  17   0 194.228 145.270   6
 -12  17   0 213.269 134.434   2
  12  17   0-5.44912 209.215   6
  13  17   0 132.395 169.951   2
  13  17   0-1.46501 219.698   6
 -13 -17   0-315.785 272.382   4
 -13  17   0 350.335 172.332   6
 -13  17   0 264.694 142.750   2
 -13 -17   0 75.8280 177.728   5
  14  17   0 3863.23 399.872   2
  14  17   0 3411.38 367.670   3
 -14  17   0 3627.36 304.487   2
  14  17   0 4207.14 470.025   6
 -14 -17   0 4415.78 514.773   4
 -14 -17   0 3897.86 407.167   5
 -14  17   0 3791.86 321.143   6
  15  17   0 292.539 182.217   2
 -15 -17   0-257.890 266.000   4
  15  17   0-42.8182 155.805   3
 -15  17   0 105.268 146.822   6
 -15 -17   0 57.8150 199.263   5
 -15  17   0 23.4927 137.780   2
  15  17   0 292.512 211.197   6
  16  17   0 69.6052 228.549   6
 -16  17   0 111.563 152.522   2
  16  17   0 97.5530 160.338   2
 -16  17   0 140.589 156.535   6
 -16 -17   0 148.257 253.032   4
 -16 -17   0 267.440 210.526   5
  16  17   0 70.6404 160.228   3
  17  17   0 11.9798 233.171   6
 -17 -17   0 291.364 275.474   4
 -17  17   0 35.1016 164.365   6
  17  17   0 69.0127 159.539   2
 -17 -17   0 223.653 210.698   5
  17  17   0 130.957 187.393   3
 -17  17   0-114.926 151.342   2
 -18  17   0 4959.11 353.506   6
 -18 -17   0 5293.83 498.469   5
  18  17   0 4494.55 439.426   3
 -18 -17   0 4351.39 526.800   4
  18  17   0 4452.32 430.968   2
  18  17   0 5093.95 505.769   6
 -18  17   0 5002.84 357.828   2
  19  17   0-54.0066 229.838   6
  19  17   0 159.698 168.229   2
 -19  17   0 191.339 157.452   2
 -19 -17   0 51.5687 195.485   5
 -19 -17   0-532.266 309.946   4
  19  17   0 218.346 214.571   3
  20  17   0 1677.58 360.252   6
  20  17   0 1146.93 257.579   2
  20  17   0 1122.39 248.792   3
 -20  17   0 1469.32 237.752   2
 -20 -17   0 668.953 302.942   4
 -20 -17   0 1474.18 313.144   5
  21  17   0 159.424 210.206   3
  21  17   0-53.0240 206.634   2
 -21 -17   0 204.544 244.222   5
  21  17   0 50.0667 223.688   6
 -21  17   0 199.014 172.379   2
 -21 -17   0-234.573 289.286   4
 -22  17   0 1909.13 253.095   2
  22  17   0 1801.47 315.802   2
 -22 -17   0 2693.98 455.946   4
  22  17   0 1586.27 286.063   3
  22  17   0 1203.88 296.140   6
 -22 -17   0 2011.02 361.623   5
  23  17   0-53.4244 192.321   2
 -23  17   0 305.961 176.143   2
 -23 -17   0 494.040 257.472   5
 -23 -17   0 68.3167 255.712   4
  23  17   0 183.739 237.700   6
  23  17   0 343.115 222.018   3
  24  17   0 493.096 237.082   2
  24  17   0 642.307 233.448   3
 -24  17   0 845.092 207.129   2
  24  17   0 632.345 244.527   6
 -24 -17   0 892.270 308.630   4
 -24 -17   0 306.375 250.638   5
 -25 -17   0-31.8908 222.653   5
  25  17   0-73.4285 203.564   2
 -25 -17   0-151.833 271.354   4
  25  17   0 169.739 204.270   3
  25  17   0-23.6369 225.509   6
  26  17   0 459.972 228.939   2
  26  17   0 452.217 293.266   6
 -26 -17   0-76.2363 219.202   5
  26  17   0 395.460 241.666   3
 -26 -17   0 775.023 318.070   4
  27  17   0-190.539 254.858   2
 -27 -17   0-291.138 254.942   5
  27  17   0 203.708 251.566   6
  27  17   0 138.971 203.077   3
 -27 -17   0 2.30383 289.372   4
 -28 -17   0 473.759 290.678   5
  28  17   0 141.839 237.216   3
 -28 -17   0 447.778 301.551   4
  28  17   0-160.045 237.691   2
  28  17   0-301.891 259.059   6
 -29 -17   0 394.995 295.859   5
  29  17   0 412.551 284.704   6
  29  17   0 439.493 271.911   3
 -29 -17   0-440.082 332.037   4
  29  17   0 323.935 230.649   2
 -30 -17   0 310.358 312.520   4
  30  17   0 64.9280 256.651   6
 -30 -17   0-379.156 320.271   5
  30  17   0-432.067 273.221   3
  30  17   0 6.11958 217.067   2
  31  17   0-3.57317 230.601   3
  31  17   0 129.691 295.462   6
  31  17   0-381.718 266.564   2
 -31 -17   0 46.1511 274.667   5
   0  18   0 12053.0 655.662   6
   0  18   0 11470.7 595.833   2
   1  18   0-111.640 191.793   6
  -1  18   0-112.137 190.454   6
  -1 -18   0 82.7258 222.979   4
   1  18   0 94.0407 169.705   2
  -1  18   0-3.68046 150.726   2
  -2  18   0 2204.48 306.622   6
   2  18   0 1871.89 296.958   6
  -2  18   0 2002.87 276.513   2
   2  18   0 2294.38 295.901   2
   2 -18   0 1976.65 218.640   5
  -2 -18   0 1704.97 329.482   4
   3  18   0-64.2236 186.403   2
  -3  18   0 388.268 168.372   2
  -3  18   0 3.88750 156.759   6
   3 -18   0-32.7178 95.8193   5
   3  18   0 237.102 178.666   6
  -3 -18   0 165.574 225.292   4
   4 -18   0 7.72504 105.385   5
   4  18   0 363.314 176.910   6
  -4 -18   0-50.7366 203.187   4
  -4 -18   0-74.9322 150.885   5
  -4  18   0-283.595 190.036   6
   4  18   0 36.3044 157.192   2
  -4  18   0-29.2620 130.448   2
  -5  18   0 197.444 152.092   2
   5  18   0 218.016 214.307   6
   5  18   0 236.168 201.223   2
  -5 -18   0 150.049 156.218   5
  -5  18   0-14.5746 189.780   6
  -5 -18   0 343.413 233.151   4
   5 -18   0 268.135 127.160   5
  -6 -18   0 192.651 217.871   4
  -6 -18   0 406.385 170.705   5
   6  18   0 128.285 162.438   2
  -6  18   0 497.717 187.369   2
  -6  18   0 1177.64 278.960   6
   6 -18   0 526.911 156.473   5
   6  18   0 314.134 224.334   6
   7  18   0 163.494 224.681   6
  -7 -18   0 227.451 227.102   4
  -7  18   0 328.131 184.832   2
   7  18   0 339.848 211.748   2
  -7 -18   0 510.977 202.658   5
  -7  18   0 408.010 212.539   6
   7 -18   0 68.3907 109.131   5
  -8 -18   0 654.621 193.931   5
  -8  18   0 773.761 197.886   2
   8 -18   0 827.879 152.389   5
  -8  18   0 617.133 183.287   6
   8  18   0 881.920 278.741   6
   8  18   0 742.439 209.967   2
  -8 -18   0 443.247 240.246   4
  -9 -18   0-59.3997 170.135   5
   9 -18   0 61.0860 134.554   5
   9  18   0-24.7681 199.975   6
  -9  18   0 333.152 172.466   2
   9  18   0-41.3518 157.029   2
  -9  18   0-402.328 210.507   6
 -10 -18   0 886.005 239.263   5
 -10  18   0 587.034 213.455   6
 -10  18   0 284.529 145.016   2
  10  18   0 637.113 204.713   2
  10  18   0 818.094 280.861   6
 -10 -18   0 959.617 310.325   4
 -11 -18   0-144.908 268.186   4
  11  18   0-112.781 222.610   6
 -11 -18   0-263.068 191.960   5
 -11  18   0 83.5610 167.193   6
  11  18   0 19.0335 161.786   2
 -11  18   0 127.854 149.517   2
 -12  18   0 163.339 179.559   6
 -12 -18   0 2.32390 175.777   5
  12  18   0-199.685 162.881   2
 -12 -18   0-347.107 273.043   4
 -12  18   0-230.494 165.156   2
 -13  18   0 17.5630 158.460   2
 -13 -18   0 208.624 204.044   5
 -13 -18   0 622.017 287.621   4
  13  18   0 49.2123 176.533   2
  13  18   0-235.000 236.420   6
 -13  18   0-204.089 191.566   6
  14  18   0-66.2619 218.440   6
  14  18   0 378.035 211.906   3
 -14  18   0 534.681 221.140   6
  14  18   0 395.172 199.114   2
 -14 -18   0 418.803 225.773   5
 -14  18   0 191.775 175.452   2
 -14 -18   0-37.9202 256.915   4
 -15 -18   0-135.048 222.497   5
  15  18   0-252.508 209.572   3
  15  18   0 6.40028 172.264   2
 -15  18   0 106.629 158.396   2
 -15 -18   0 111.952 283.763   4
  15  18   0 191.896 248.244   6
 -15  18   0-65.7570 171.646   6
 -16 -18   0 322.948 253.926   4
  16  18   0 547.957 222.030   3
  16  18   0 623.800 271.728   6
 -16  18   0 650.518 215.409   2
  16  18   0 598.652 219.534   2
 -16 -18   0 871.840 272.936   5
 -16  18   0 798.475 219.234   6
  17  18   0 83.0857 231.991   6
 -17  18   0-352.780 234.980   6
 -17 -18   0 19.0198 206.491   5
  17  18   0 248.377 186.719   2
 -17 -18   0 396.576 286.638   4
  17  18   0 44.1223 179.859   3
 -17  18   0-59.6842 171.082   2
 -18 -18   0 2613.11 449.438   4
  18  18   0 2859.48 359.333   3
  18  18   0 3359.60 398.418   2
  18  18   0 3295.96 448.551   6
 -18 -18   0 2764.15 374.551   5
 -18  18   0 3760.95 341.929   2
  19  18   0 162.106 174.673   2
 -19 -18   0 171.738 254.053   5
  19  18   0 659.623 288.949   6
 -19  18   0 210.297 181.883   2
 -19 -18   0 212.464 269.605   4
  19  18   0 247.205 210.505   3
  20  18   0 445.187 252.153   6
  20  18   0 39.9988 203.210   2
 -20 -18   0 302.875 322.167   4
 -20  18   0 451.324 210.076   2
  20  18   0-20.8044 182.857   3
 -20 -18   0 427.588 287.310   5
 -21  18   0 466.679 211.155   2
 -21 -18   0 1117.43 378.037   4
  21  18   0 697.090 239.628   3
  21  18   0 326.160 273.758   6
  21  18   0 431.862 203.980   2
 -21 -18   0 629.749 283.052   5
 -22 -18   0 541.749 255.017   5
  22  18   0 634.208 283.582   6
  22  18   0 970.828 259.855   2
 -22  18   0 624.818 220.830   2
  22  18   0 657.806 246.549   3
 -22 -18   0 1449.32 400.343   4
 -23 -18   0 249.106 249.817   5
  23  18   0-24.6113 209.664   2
  23  18   0 27.0482 240.261   6
 -23 -18   0 860.549 380.667   4
  23  18   0 202.944 208.531   3
 -23  18   0-185.532 233.066   2
  24  18   0 956.175 271.281   3
  24  18   0 1094.80 310.254   6
  24  18   0 1231.63 303.263   2
 -24 -18   0 1421.83 352.431   5
 -24 -18   0 1702.42 420.731   4
 -25 -18   0 84.4215 301.300   4
  25  18   0-55.3063 251.491   6
 -25 -18   0 301.369 253.612   5
  25  18   0 54.0679 206.071   3
  25  18   0-35.9663 201.976   2
 -26 -18   0 369.242 316.121   4
  26  18   0 659.652 245.676   3
  26  18   0 1008.15 336.756   6
 -26 -18   0 759.183 290.160   5
  26  18   0 982.370 284.877   2
  27  18   0 61.0067 237.501   2
 -27 -18   0 185.552 262.752   5
 -27 -18   0 704.384 374.929   4
  27  18   0 194.600 296.640   6
  27  18   0-134.390 209.121   3
 -28 -18   0 354.800 313.467   5
  28  18   0 76.8921 244.944   2
 -28 -18   0 237.720 338.094   4
  28  18   0 268.111 234.458   3
  28  18   0-234.175 270.937   6
  29  18   0 514.157 251.423   3
 -29 -18   0-70.7740 344.287   4
  29  18   0 8.40162 224.599   2
  29  18   0 421.511 318.954   6
 -29 -18   0 75.8363 275.377   5
   0  19   0 226.833 165.077   2
   0  19   0 326.937 212.789   6
   1  19   0 312.676 204.851   2
  -1  19   0 57.4781 151.845   2
  -1  19   0-61.9258 187.985   6
   1  19   0 69.1697 195.359   6
  -2 -19   0 2861.07 302.638   5
  -2  19   0 3357.35 389.163   6
   2  19   0 3108.44 355.214   2
  -2  19   0 3089.75 346.715   2
  -2 -19   0 2489.73 386.723   4
   2  19   0 3210.21 393.577   6
   3  19   0-145.942 208.968   6
  -3  19   0 173.658 187.961   6
  -3  19   0 95.3629 169.567   2
   3  19   0 20.2981 191.505   2
   3 -19   0 155.718 118.674   5
  -3 -19   0-213.799 225.618   4
  -3 -19   0-85.2545 148.350   5
   4  19   0 108.271 182.187   2
  -4 -19   0 137.297 154.390   5
   4  19   0 415.407 219.680   6
  -4  19   0-139.844 148.965   2
   4 -19   0-377.016 150.585   5
  -4 -19   0-62.6178 226.258   4
  -4  19   0 466.325 219.178   6
  -5 -19   0 13.3247 225.718   4
  -5 -19   0-136.401 155.023   5
   5 -19   0 81.0163 124.608   5
   5  19   0 186.272 218.967   6
   5  19   0-230.220 191.402   2
  -5  19   0 197.682 209.265   6
  -5  19   0 49.4939 147.157   2
  -6  19   0 6119.62 482.462   6
  -6 -19   0 5571.69 432.800   5
   6 -19   0 5352.94 329.381   5
  -6 -19   0 4582.76 483.680   4
   6  19   0 5888.86 527.403   6
  -6  19   0 5902.15 435.385   2
   6  19   0 6586.33 512.038   2
  -7 -19   0 255.201 184.944   5
   7  19   0 221.424 175.583   2
  -7 -19   0 268.737 249.522   4
   7  19   0 289.907 240.888   6
  -7  19   0 108.941 161.943   2
   7 -19   0-54.9244 145.812   5
  -7  19   0 377.622 221.802   6
  -8  19   0 638.670 238.237   6
  -8 -19   0 1265.56 253.086   5
   8  19   0 1444.94 286.348   2
   8  19   0 1030.83 301.928   6
  -8 -19   0 1161.66 321.468   4
  -8  19   0 1404.85 263.531   2
  -9  19   0 149.077 170.871   2
  -9 -19   0-170.650 173.506   5
   9  19   0-94.2360 190.907   2
   9  19   0 148.423 238.133   6
  -9  19   0 74.2487 199.863   6
  -9 -19   0-17.3004 225.317   4
  10  19   0 1015.22 317.421   6
  10  19   0 855.600 241.871   2
 -10  19   0 823.903 229.096   2
 -10  19   0 871.461 251.753   6
 -10 -19   0 809.524 311.212   4
 -10 -19   0 1063.34 262.241   5
 -11 -19   0-55.0602 182.968   5
 -11  19   0 135.776 161.635   2
 -11  19   0-51.7436 205.258   6
  11  19   0-41.9283 164.977   2
  11  19   0 357.381 274.790   6
 -11 -19   0-137.258 223.985   4
 -12  19   0 768.155 221.795   2
  12  19   0 896.988 318.217   6
  12  19   0 499.613 221.297   2
 -12 -19   0 331.242 281.094   4
 -12 -19   0 988.501 268.769   5
 -12  19   0 475.994 220.970   6
  13  19   0 231.331 198.125   2
 -13 -19   0-183.548 261.667   4
  13  19   0 36.4934 246.176   6
 -13 -19   0 282.069 223.569   5
 -13  19   0-56.7897 188.919   2
 -13  19   0-245.663 222.964   6
  14  19   0 1691.20 306.505   3
  14  19   0 2304.02 404.249   6
 -14 -19   0 1929.46 342.991   5
 -14  19   0 2548.79 321.169   2
  14  19   0 2329.04 341.227   2
 -14  19   0 2115.23 306.419   6
 -14 -19   0 1790.90 403.297   4
 -15 -19   0-57.1593 221.727   5
  15  19   0 174.628 268.240   6
  15  19   0 174.048 168.316   3
  15  19   0 392.423 232.223   2
 -15 -19   0-417.446 325.478   4
 -15  19   0-118.257 225.020   6
 -15  19   0 125.384 193.137   2
  16  19   0-78.8869 197.198   2
  16  19   0-132.803 199.172   3
 -16 -19   0-64.6983 216.580   5
 -16  19   0 326.743 198.208   2
  16  19   0 62.1016 260.602   6
  17  19   0 387.829 209.513   3
 -17 -19   0-380.839 221.308   5
 -17 -19   0 316.877 300.030   4
  17  19   0 54.9606 187.592   2
  17  19   0 155.477 243.451   6
 -17  19   0 91.7344 206.005   2
 -18  19   0 24.1770 197.673   2
  18  19   0 605.361 295.739   6
  18  19   0 127.859 188.027   2
 -18 -19   0 59.6117 239.538   5
  18  19   0 0.29293 200.798   3
 -18 -19   0-191.545 305.380   4
 -19  19   0 458.657 231.349   2
  19  19   0 837.086 263.916   3
 -19 -19   0 267.462 218.070   5
 -19 -19   0 479.744 315.608   4
  19  19   0 463.357 206.450   2
  19  19   0 246.177 266.323   6
 -20 -19   0 353.237 256.477   5
  20  19   0 300.225 207.969   2
 -20 -19   0-356.280 347.557   4
 -20  19   0 411.373 237.298   2
  20  19   0 196.930 200.228   3
  20  19   0 26.9220 243.283   6
 -21  19   0 706.720 247.032   2
 -21 -19   0 691.326 349.183   4
 -21 -19   0 80.9973 244.245   5
  21  19   0 499.266 294.004   6
  21  19   0 359.546 212.469   2
  21  19   0 317.866 216.961   3
 -22  19   0-597.344 276.276   2
  22  19   0-162.460 260.548   6
  22  19   0 91.3085 190.251   2
 -22 -19   0 374.568 284.806   5
 -22 -19   0 395.819 320.004   4
  22  19   0 191.408 188.225   3
  23  19   0 455.858 227.345   2
  23  19   0 121.066 200.964   3
 -23 -19   0 196.252 344.254   4
 -23 -19   0-254.536 263.641   5
  23  19   0 355.574 280.856   6
 -24 -19   0-158.635 246.916   5
  24  19   0 88.3738 199.205   3
  24  19   0-117.583 266.590   6
 -24 -19   0 807.845 406.596   4
  24  19   0 514.083 250.865   2
 -25 -19   0 304.821 315.764   4
 -25 -19   0-221.148 275.449   5
  25  19   0 53.1972 255.927   6
  25  19   0-90.0131 219.116   2
  25  19   0-19.8707 213.773   3
 -26 -19   0 160.483 255.369   5
 -26 -19   0-47.1701 334.746   4
  26  19   0-89.0151 266.601   6
  26  19   0-141.299 247.489   3
  26  19   0 22.2845 230.744   2
 -27 -19   0-535.623 328.875   5
  27  19   0 144.009 235.526   3
  27  19   0 710.304 354.038   6
  27  19   0-58.3108 228.193   2
 -27 -19   0-268.855 353.564   4
   0 -20   0 9112.48 494.795   5
   0  20   0 10270.9 676.471   6
   0  20   0 9269.34 585.122   2
   1  20   0 324.884 252.851   6
  -1 -20   0-237.979 178.763   5
  -1  20   0 269.900 234.526   6
   1  20   0 92.7028 171.479   2
  -1  20   0-33.2207 174.820   2
  -2  20   0 275.768 240.175   6
   2  20   0 145.470 209.169   6
  -2  20   0 40.9581 156.479   2
  -2 -20   0 203.144 147.630   5
   2  20   0 383.383 225.902   2
  -3 -20   0-138.604 226.128   4
   3  20   0-175.002 227.611   6
  -3 -20   0 141.191 162.917   5
   3  20   0 13.9098 181.736   2
  -3  20   0 283.284 188.681   2
  -3  20   0-25.3955 219.857   6
   4  20   0 313.121 199.365   2
  -4  20   0 344.037 188.483   2
  -4  20   0 180.283 218.511   6
  -4 -20   0 223.317 218.390   4
   4  20   0 218.018 215.566   6
  -4 -20   0 674.479 211.440   5
   5 -20   0-303.901 176.921   5
   5  20   0 359.141 251.722   6
   5  20   0 6.71382 187.210   2
  -5  20   0-9.47715 161.816   2
  -5  20   0 309.044 247.575   6
  -5 -20   0-448.120 279.653   4
  -5 -20   0-488.398 213.922   5
   6  20   0 90.4375 234.159   6
  -6 -20   0-228.121 172.042   5
  -6  20   0-267.053 243.193   6
   6  20   0 8.55406 204.572   2
  -6 -20   0 33.6511 227.771   4
  -6  20   0 414.651 220.480   2
   7  20   0 183.094 206.585   2
  -7 -20   0 96.2500 247.204   4
  -7 -20   0 45.0365 156.342   5
  -7  20   0-65.5934 230.361   6
  -7  20   0 247.184 191.839   2
   7  20   0 381.655 262.956   6
  -8  20   0 1967.51 347.046   6
  -8 -20   0 1698.19 284.443   5
   8  20   0 2076.77 373.884   6
   8  20   0 1628.41 307.089   2
  -8  20   0 1729.33 282.327   2
  -8 -20   0 1999.43 406.013   4
   9  20   0-246.974 214.950   2
  -9 -20   0-260.572 199.855   5
  -9 -20   0 104.270 248.370   4
   9  20   0 373.434 282.395   6
  -9  20   0-74.5041 194.452   2
  -9  20   0 555.572 296.809   6
 -10 -20   0 481.073 220.061   5
  10  20   0 230.120 272.411   6
 -10 -20   0 70.8016 240.954   4
  10  20   0 639.643 247.480   2
 -10  20   0 161.907 228.991   6
 -10  20   0 582.291 225.335   2
 -11 -20   0 354.135 280.532   4
 -11  20   0-81.7183 202.264   2
  11  20   0-224.498 265.314   6
  11  20   0-197.990 218.236   2
 -11  20   0-154.843 237.150   6
 -11 -20   0-308.625 195.107   5
 -12 -20   0 141.780 186.861   5
  12  20   0 143.431 201.410   2
 -12  20   0 282.173 247.023   6
 -12  20   0 252.074 212.006   2
  12  20   0 161.967 251.753   6
 -12 -20   0 235.490 271.053   4
 -13 -20   0 227.037 207.870   5
  13  20   0 389.485 280.447   6
 -13 -20   0-140.334 262.379   4
 -13  20   0 116.221 195.122   2
  13  20   0 461.025 255.649   2
 -14  20   0 197.655 193.824   2
 -14 -20   0 507.504 267.874   5
  14  20   0 312.868 224.385   3
 -14 -20   0 430.118 295.834   4
  14  20   0 117.181 211.229   2
  14  20   0-29.8154 245.401   6
 -15 -20   0 308.747 297.949   4
  15  20   0 221.052 291.082   6
 -15 -20   0-92.4966 235.414   5
 -15  20   0-126.392 230.936   2
  15  20   0 120.818 227.668   2
  15  20   0-262.235 220.491   3
  16  20   0 2086.00 358.032   2
 -16  20   0 1566.19 302.713   2
  16  20   0 1530.22 316.624   3
 -16 -20   0 393.075 295.749   4
 -16 -20   0 1683.15 344.563   5
  16  20   0 1468.10 376.930   6
  17  20   0 23.1600 201.460   2
  17  20   0 364.584 230.807   3
 -17  20   0 639.740 264.010   2
 -17 -20   0 203.681 233.352   5
  17  20   0 502.953 300.310   6
 -17 -20   0 695.354 337.229   4
 -18  20   0 773.528 243.840   2
 -18 -20   0 1018.19 316.564   5
  18  20   0 446.570 275.831   6
 -18 -20   0 168.034 286.154   4
  18  20   0 806.000 238.462   3
  18  20   0 752.812 257.418   2
 -19 -20   0 399.824 333.940   4
 -19  20   0 325.505 243.261   2
  19  20   0-73.3905 218.247   2
 -19 -20   0-179.099 251.809   5
  19  20   0 222.178 259.747   6
  19  20   0 43.4047 193.126   3
  20  20   0 645.451 302.117   6
 -20  20   0 1007.82 268.414   2
  20  20   0 948.922 259.255   2
  20  20   0 818.587 262.179   3
 -20 -20   0 971.173 367.101   4
 -20 -20   0 669.106 259.105   5
  21  20   0-4.44691 241.072   2
 -21 -20   0 543.496 371.571   4
  21  20   0 91.3861 270.561   6
 -21 -20   0-279.096 249.689   5
  21  20   0 113.821 215.209   3
  22  20   0 929.405 326.973   6
 -22 -20   0 20.0555 263.799   5
  22  20   0 675.236 237.216   2
  22  20   0 344.785 209.643   3
 -23 -20   0-576.033 343.199   4
 -23 -20   0-591.909 316.600   5
  23  20   0-94.8232 280.895   6
  23  20   0-63.0154 235.871   2
  23  20   0-12.6602 237.739   3
  24  20   0 239.366 227.856   3
  24  20   0 528.452 278.310   2
 -24 -20   0-409.064 369.408   4
 -24 -20   0 812.782 337.282   5
  24  20   0 36.9202 263.008   6
  25  20   0-102.635 274.094   6
  25  20   0 57.1459 219.910   3
  25  20   0-122.277 217.027   2
 -25 -20   0 845.737 426.665   4
 -25 -20   0 388.347 311.855   5
   0  21   0 8.02821 172.048   2
   0 -21   0 54.1532 151.313   5
   0  21   0 277.521 243.738   6
  -1 -21   0 506.513 198.089   5
  -1  21   0-93.4219 259.849   6
   1  21   0 214.765 248.705   6
   1 -21   0 122.412 159.731   5
   1  21   0 148.705 210.185   2
  -1  21   0-24.6934 184.979   2
  -2  21   0 5132.26 464.778   2
   2  21   0 5214.10 526.450   6
  -2 -21   0 4397.76 375.979   5
  -2  21   0 4917.62 504.829   6
   2  21   0 4823.83 456.104   2
  -3  21   0 34.9962 181.996   2
   3  21   0 171.534 265.272   6
  -3  21   0 656.310 307.020   6
  -3 -21   0-22.9310 169.950   5
   3  21   0-99.8851 200.187   2
   4  21   0 135.405 203.979   2
  -4 -21   0-126.506 173.756   5
  -4  21   0-186.575 265.061   6
  -4  21   0 50.1513 188.155   2
   4  21   0 572.286 287.605   6
  -5 -21   0-144.851 259.547   4
  -5 -21   0 35.4274 175.662   5
   5  21   0-32.0769 249.059   6
   5  21   0 24.0340 207.049   2
  -5  21   0 35.9929 250.829   6
  -5  21   0-48.2217 196.306   2
  -6 -21   0 68.4942 238.252   4
  -6 -21   0 326.413 204.565   5
  -6  21   0 170.260 207.374   2
   6  21   0 83.7510 197.706   2
  -6  21   0 462.479 286.325   6
   6  21   0 424.405 299.899   6
   7  21   0 22.9921 206.393   2
  -7  21   0 392.956 241.465   2
  -7 -21   0 27.0851 165.549   5
   7  21   0 228.857 247.454   6
  -7 -21   0 530.240 290.405   4
  -7  21   0 198.487 277.090   6
  -8 -21   0-225.531 283.672   4
  -8 -21   0 101.185 166.243   5
   8  21   0-8.74883 193.057   2
  -8  21   0-11.5466 260.946   6
  -8  21   0 115.772 214.875   2
   8  21   0-86.3292 262.933   6
  -9  21   0-394.440 289.570   6
  -9 -21   0 120.305 183.048   5
   9  21   0-113.029 254.182   6
   9  21   0 63.2091 202.834   2
  -9  21   0-161.160 209.871   2
  -9 -21   0 212.243 274.591   4
 -10 -21   0 1207.89 361.290   4
 -10  21   0 1815.08 376.288   6
  10  21   0 1941.37 406.378   6
 -10  21   0 1872.09 315.824   2
 -10 -21   0 1411.81 291.690   5
  10  21   0 1273.08 292.058   2
 -11  21   0 136.689 208.198   2
 -11 -21   0 38.3272 205.421   5
 -11 -21   0-138.273 287.061   4
  11  21   0 273.298 270.041   6
  11  21   0-162.175 238.686   2
 -11  21   0 765.748 321.110   6
 -12 -21   0-56.5204 184.895   5
 -12  21   0-107.260 237.866   2
  12  21   0 249.027 197.343   2
  12  21   0 406.875 297.267   6
 -12 -21   0 202.323 278.297   4
  13  21   0-194.032 283.763   6
 -13 -21   0 97.6496 204.040   5
 -13  21   0 342.398 261.634   2
 -13 -21   0 3.38792 286.509   4
  13  21   0 219.138 217.528   2
 -14 -21   0 625.791 243.818   5
  14  21   0 1428.35 373.814   6
  14  21   0 1013.18 288.083   2
  14  21   0 853.043 270.052   3
 -14  21   0 1786.17 346.152   2
 -14 -21   0 1485.59 376.867   4
 -15 -21   0-246.416 231.895   5
  15  21   0 330.658 242.075   2
 -15 -21   0 301.803 299.289   4
  15  21   0-78.0818 295.835   6
  15  21   0 234.860 232.192   3
 -15  21   0-481.716 270.384   2
  16  21   0-177.653 215.221   3
 -16  21   0 143.750 242.707   2
 -16 -21   0 180.529 238.033   5
 -16 -21   0 113.022 294.355   4
  16  21   0 102.168 271.387   6
  16  21   0-367.190 235.903   2
  17  21   0 477.972 241.696   3
  17  21   0 469.134 262.935   2
  17  21   0 208.557 280.776   6
 -17 -21   0 214.088 276.699   5
 -17  21   0-271.422 244.596   2
 -17 -21   0 168.783 299.263   4
  18  21   0 1632.42 404.071   6
  18  21   0 1377.21 336.227   2
 -18  21   0 1274.98 306.778   2
 -18 -21   0 1623.69 369.474   5
  18  21   0 1077.74 273.401   3
 -18 -21   0 2332.53 457.397   4
 -19  21   0 426.476 260.224   2
  19  21   0 201.978 221.341   2
  19  21   0 25.5623 282.282   6
 -19 -21   0 160.389 261.395   5
 -19 -21   0 409.801 332.315   4
  19  21   0 453.280 249.015   3
 -20 -21   0 229.659 252.881   5
  20  21   0 369.650 254.457   2
  20  21   0 91.8385 276.291   6
  20  21   0 194.627 222.094   3
 -20 -21   0 466.645 360.058   4
  21  21   0-62.2754 215.309   3
 -21 -21   0-20.4256 290.077   4
  21  21   0 732.610 298.333   2
 -21 -21   0-75.7128 259.230   5
  21  21   0 248.373 292.007   6
 -22 -21   0-47.5224 271.788   5
  22  21   0-308.927 282.291   2
 -22 -21   0 350.712 342.324   4
  22  21   0 403.268 318.131   6
  22  21   0-208.535 230.696   3
   0 -22   0 512.570 196.608   5
   0  22   0 795.098 292.754   2
   0  22   0 419.857 267.660   6
   1 -22   0-121.038 177.646   5
   1  22   0 391.695 240.655   2
  -1 -22   0 209.433 177.467   5
   1  22   0-67.9489 294.723   6
  -1  22   0 77.0646 205.878   2
  -1  22   0 3.63800 284.104   6
   2  22   0-3.33369 204.011   2
   2  22   0 85.9791 287.530   6
  -2 -22   0-197.803 166.382   5
  -2  22   0 499.288 252.423   2
  -2  22   0 293.718 310.347   6
  -3 -22   0-15.9325 160.561   5
   3  22   0-76.6550 213.239   2
  -3  22   0 36.7523 279.607   6
  -3  22   0 47.1596 228.155   2
   3  22   0-33.1549 265.262   6
   4  22   0 2233.65 367.569   2
   4  22   0 2369.92 435.676   6
  -4  22   0 2191.53 418.473   6
  -4  22   0 1714.85 319.719   2
  -4 -22   0 1564.60 279.076   5
  -5  22   0-26.1880 223.579   2
   5  22   0-297.838 271.323   6
  -5 -22   0 80.6359 200.975   5
  -5  22   0 249.263 328.172   6
   5  22   0-115.316 236.066   2
  -6 -22   0 639.929 329.105   4
   6  22   0 928.681 297.808   2
  -6 -22   0 873.541 254.806   5
   6  22   0 573.120 311.425   6
  -6  22   0 1106.52 375.431   6
  -6  22   0 758.925 282.700   2
  -7 -22   0 221.527 192.226   5
   7  22   0-377.433 259.749   2
  -7 -22   0-329.889 305.620   4
  -7  22   0 306.065 317.899   6
   7  22   0-203.301 294.987   6
  -7  22   0 139.445 211.436   2
   8  22   0 632.868 339.845   6
  -8  22   0 1073.94 276.529   2
  -8 -22   0 863.357 255.583   5
  -8  22   0 1660.49 389.652   6
   8  22   0 1144.82 318.455   2
  -8 -22   0 507.272 325.211   4
  -9 -22   0 513.570 216.225   5
  -9 -22   0 109.263 255.212   4
  -9  22   0-52.6243 236.866   2
  -9  22   0-71.8957 294.721   6
   9  22   0-384.717 265.227   2
   9  22   0 677.757 362.062   6
 -10  22   0 479.538 270.204   2
  10  22   0 182.561 255.540   2
 -10 -22   0 34.3053 193.016   5
  10  22   0-596.609 334.148   6
 -10 -22   0-119.788 284.782   4
 -10  22   0-919.719 394.436   6
  11  22   0-63.1601 214.206   2
 -11 -22   0 108.544 272.289   4
 -11  22   0 121.057 233.862   2
 -11 -22   0 256.926 204.700   5
  11  22   0 120.763 278.681   6
 -12 -22   0-12.5572 200.460   5
  12  22   0 175.830 236.438   2
 -12  22   0 251.145 240.268   2
  12  22   0 273.307 288.398   6
 -12 -22   0 298.484 307.211   4
  13  22   0-80.3494 229.363   2
 -13  22   0 142.573 252.372   2
 -13 -22   0 308.993 221.829   5
  13  22   0 328.361 291.844   6
 -13 -22   0 26.0777 294.042   4
 -14 -22   0 637.067 253.937   5
  14  22   0 630.725 259.650   3
  14  22   0 541.483 219.721   2
 -14  22   0 802.795 286.243   2
 -14 -22   0 644.056 336.314   4
  14  22   0 908.878 350.947   6
 -15 -22   0 791.415 367.917   4
 -15 -22   0-184.542 229.868   5
  15  22   0-357.559 320.040   6
  15  22   0 22.5125 198.364   2
  15  22   0 84.3847 213.726   3
 -15  22   0-80.5226 255.643   2
 -16 -22   0 41.7318 293.806   4
 -16 -22   0 318.770 242.707   5
  16  22   0 44.0406 225.462   2
  16  22   0 434.375 282.723   3
  16  22   0 237.156 309.744   6
 -16  22   0 134.657 251.121   2
 -17  22   0 44.0580 255.369   2
 -17 -22   0-298.606 329.325   4
  17  22   0-473.502 292.275   3
  17  22   0 27.9929 290.851   6
 -17 -22   0-87.6507 240.243   5
  17  22   0 467.795 270.253   2
  18  22   0-402.836 301.514   2
  18  22   0 527.624 250.664   3
  18  22   0 261.053 306.770   6
 -18 -22   0 421.996 321.600   4
 -18 -22   0-308.786 252.989   5
   0  23   0 574.033 335.060   6
   0  23   0 114.720 232.640   2
   1  23   0-113.674 217.652   2
  -1  23   0-238.299 297.779   6
   1  23   0-86.2513 307.287   6
  -1  23   0 17.4981 242.303   2
  -1 -23   0-674.211 276.899   5
   2  23   0 335.291 229.428   2
  -2  23   0 237.355 325.056   6
  -2  23   0 16.0699 259.718   2
  -2 -23   0 197.892 182.124   5
   2  23   0 689.932 337.528   6
  -3 -23   0-27.4041 187.023   5
   3  23   0-34.0264 205.910   2
  -3  23   0 285.800 260.639   2
  -3  23   0 183.410 348.374   6
   3  23   0-12.5311 302.038   6
   4  23   0-83.9885 293.275   6
  -4  23   0-157.206 320.611   6
   4  23   0 97.2422 220.609   2
  -4 -23   0-257.546 195.265   5
  -4  23   0-422.294 265.208   2
   5  23   0-352.599 342.193   6
  -5 -23   0 169.734 207.340   5
  -5  23   0 550.816 371.063   6
   5  23   0 108.296 214.205   2
  -5  23   0 7.70893 235.445   2
  -6 -23   0 1627.54 298.968   5
  -6  23   0 1560.99 332.504   2
  -6  23   0 2298.16 451.252   6
   6  23   0 2281.61 462.530   6
   6  23   0 1566.15 333.388   2
  -7  23   0-186.027 328.398   6
   7  23   0 44.0984 320.983   6
  -7  23   0 272.233 268.618   2
   7  23   0 106.475 233.990   2
  -7 -23   0 491.618 252.246   5
   8  23   0 578.678 292.853   2
  -8 -23   0 184.084 298.452   4
  -8  23   0-262.013 257.362   2
  -8 -23   0 151.139 220.163   5
   8  23   0 675.566 376.389   6
  -8  23   0 46.5612 334.290   6
  -9 -23   0-70.8224 204.070   5
   9  23   0-529.868 330.783   6
  -9  23   0 227.792 271.524   2
  -9 -23   0 94.2688 298.191   4
   9  23   0-81.9049 258.164   2
 -10 -23   0 2158.25 345.615   5
  10  23   0 2481.56 458.858   6
  10  23   0 2365.07 379.581   2
 -10  23   0 2278.91 384.111   2
 -10 -23   0 1499.62 402.651   4
 -11 -23   0-319.481 332.316   4
 -11  23   0 599.497 323.604   2
  11  23   0 81.6175 224.217   2
  11  23   0 742.105 337.255   6
 -11 -23   0 239.732 221.948   5
  12  23   0 996.916 388.194   6
 -12 -23   0 629.840 263.119   5
 -12 -23   0 845.303 366.967   4
  12  23   0 924.605 296.317   2
 -12  23   0 750.901 308.480   2
 -13 -23   0 207.365 228.893   5
 -13 -23   0 285.154 347.046   4
  13  23   0-394.535 294.712   6
  13  23   0 0.93805 225.401   2
 -13  23   0-216.734 270.013   2
  14  23   0 111.750 233.192   3
 -14 -23   0-31.5211 213.364   5
  14  23   0-58.1916 240.421   2
 -14  23   0 60.3420 270.485   2
 -14 -23   0-266.245 332.256   4
  14  23   0-30.9614 285.251   6
   0  24   0 1185.94 347.647   2
   0  24   0 1173.12 410.342   6
   1  24   0 477.727 373.054   6
  -1  24   0 135.566 257.297   2
  -1  24   0 566.813 404.213   6
   1  24   0-10.9336 247.880   2
  -2  24   0-107.606 357.045   6
   2  24   0-369.934 296.738   2
   2  24   0 222.750 341.835   6
  -2  24   0-128.830 250.708   2
  -3  24   0 312.815 373.563   6
  -3  24   0 246.668 269.589   2
   3  24   0-376.326 399.366   6
   3  24   0-135.076 247.380   2
  -4  24   0-183.147 359.640   6
  -4 -24   0-63.2110 192.275   5
   4  24   0 257.974 229.756   2
  -4  24   0 166.150 252.309   2
   4  24   0 105.937 334.333   6
   5  24   0-142.247 331.866   6
  -5 -24   0-22.7871 204.321   5
   5  24   0-125.795 251.625   2
  -5  24   0 88.6594 351.879   6
  -5  24   0-271.577 279.638   2
   6  24   0 312.399 376.651   6
   6  24   0 544.545 282.126   2
  -6 -24   0 228.746 213.632   5
  -6  24   0 5.27345 374.292   6
  -6  24   0-156.883 268.966   2
  -7  24   0 451.480 304.803   2
  -7 -24   0 98.5193 227.892   5
   7  24   0 93.5041 356.808   6
   7  24   0-62.1352 242.551   2
   0   0  -1 24.2805 19.3304   5
   0   0  -1-5.06483 12.2147   6
   0   0   1 10.8317 15.7101   5
   0   0   1 38.9952 18.9648   6
   0   0  -1 9.39593 15.7369   2
   0   0   1-3.38753 14.9160   2
   0   0  -1 42.9511 22.4281   4
   0   0   1 12.9349 17.5715   4
   1   0   1 1235.96 68.6107   5
   1   0  -1 44.3851 16.2010   3
   1   0  -1 1172.77 62.5118   5
  -1   0  -1-3.73294 13.4227   2
  -1   0  -1 773.581 55.6846   5
   1   0  -1 1338.36 71.5538   4
  -1   0  -1 1379.94 74.0574   4
   1   0   1 1327.46 56.6383   2
  -1   0   1 1.85796 15.5486   4
   1   0  -1 855.845 57.8228   6
   1   0  -1-24.8176 18.6934   2
   1   0   1 821.303 56.2635   4
  -1   0   1 1385.58 69.8165   3
  -1   0   1 1309.92 67.3026   2
  -1   0   1 1328.55 71.0462   6
  -2   0   1 41176.7 365.745   5
  -2   0  -1 42456.4 415.561   5
   2   0  -1 31619.4 353.291   2
   2   0  -1 48036.2 436.360   6
   2   0  -1 42993.9 410.746   3
   2   0  -1 48259.7 396.256   5
   2   0   1 45330.4 403.039   4
   2   0  -1 45704.2 404.587   4
  -2   0   1 46965.4 435.536   3
   2   0   1 47412.4 366.359   6
   2   0   1 47582.2 427.315   5
  -2   0  -1 41604.7 395.021   4
  -2   0   1 48077.6 445.172   6
  -2   0   1 46721.8 416.785   2
  -3   0  -1 193.969 32.6001   4
  -3   0   1 334.185 44.5350   2
  -3   0   1 247.211 33.3654   4
   3   0   1 206.824 30.3480   4
   3   0   1 328.596 37.6160   6
   3   0  -1 284.739 37.5902   4
  -3   0  -1 187.570 30.7662   6
   3   0  -1 277.093 43.1968   3
   3   0  -1 310.413 44.1368   2
   3   0   1 281.548 44.3216   5
  -3   0  -1 281.026 43.1357   5
   3   0  -1 245.988 39.7755   6
  -3   0   1 312.732 37.6787   5
   3   0  -1 283.271 38.3237   5
  -3   0   1 284.158 44.4855   6
  -3   0   1 313.184 47.0915   3
  -4   0   1 5140.46 170.751   6
  -4   0   1 5274.71 143.949   5
  -4   0  -1 5256.45 169.226   5
  -4   0   1 4992.91 134.632   4
   4   0  -1 5094.08 169.331   3
   4   0  -1 4953.72 159.855   2
  -4   0  -1 4675.65 132.023   4
   4   0   1 5241.63 135.496   6
  -4   0   1 3849.02 139.050   2
  -4   0  -1 5091.84 132.688   6
   4   0  -1 5102.74 133.534   4
   4   0   1 5348.41 169.537   5
  -4   0   1 5063.82 170.740   3
   4   0  -1 5363.84 154.608   5
   4   0  -1 4183.20 149.661   6
   4   0   1 4901.20 133.236   4
   5   0  -1 606.944 66.2197   2
  -5   0   1 609.340 70.4531   3
  -5   0   1 783.240 65.9953   5
  -5   0   1 658.458 72.3758   6
  -5   0  -1 668.545 55.9902   4
   5   0   1 635.829 46.3490   2
  -5   0  -1 711.299 45.7175   2
   5   0  -1 662.425 72.5040   3
  -5   0  -1 753.972 61.6999   6
   5   0   1 621.220 50.3816   4
  -5   0  -1 725.004 75.4476   5
   5   0  -1 617.587 50.9733   4
   5   0   1 646.129 69.3695   5
   5   0   1 719.159 61.3624   6
   5   0  -1 635.571 65.3821   6
   5   0  -1 742.005 68.6880   5
  -5   0   1 577.582 49.6568   4
  -5   0   1 664.367 64.6649   2
   6   0  -1 49030.2 555.146   2
   6   0   1 52543.0 599.320   5
  -6   0   1 51523.8 422.219   4
   6   0   1 51791.0 409.766   3
   6   0   1 51693.4 416.783   2
   6   0   1 52179.3 421.170   4
  -6   0  -1 52301.6 406.501   2
  -6   0   1 53563.4 634.111   3
  -6   0   1 54124.4 625.916   6
  -6   0  -1 51666.1 415.779   3
   6   0   1 53087.9 506.220   6
  -6   0   1 50305.8 545.959   2
  -6   0  -1 52104.5 442.300   4
  -6   0  -1 54146.1 610.776   5
   6   0  -1 52397.0 582.753   6
   6   0  -1 55050.6 629.963   3
  -6   0   1 53865.8 519.380   5
  -6   0  -1 54792.2 508.045   6
   6   0  -1 53532.3 549.898   5
   7   0  -1 50.1653 45.7911   6
  -7   0   1 13.8330 26.8729   4
  -7   0   1-21.6297 37.8670   2
  -7   0   1 47.0033 43.0512   5
   7   0  -1-7.11262 42.9931   3
  -7   0  -1-34.7391 31.2470   4
   7   0   1-0.96502 50.5710   5
  -7   0  -1 1.68529 28.7559   2
  -7   0   1 49.7160 56.1953   6
  -7   0   1-44.4153 58.2487   3
   7   0   1 22.3860 28.8980   2
   7   0  -1-34.9592 45.9128   2
   7   0   1 33.1619 41.6573   6
   7   0   1-6.94072 27.0195   3
  -7   0  -1 30.5737 52.7134   5
  -7   0  -1 19.0819 29.8205   3
   7   0   1 5.65820 28.5683   4
  -7   0  -1 7.63811 41.8259   6
   7   0  -1 43.0152 49.2672   5
   8   0  -1 718.779 91.7415   6
  -8   0   1 677.949 83.5619   2
   8   0   1 716.268 81.8554   6
   8   0  -1 768.593 92.0910   5
  -8   0   1 717.545 76.9692   5
  -8   0  -1 678.875 58.7651   4
  -8   0   1 731.256 58.6082   4
   8   0  -1 722.222 92.0420   3
  -8   0  -1 677.416 80.1059   6
  -8   0  -1 556.285 58.9127   2
   8   0   1 588.293 61.6485   3
   8   0   1 713.119 55.8569   4
  -8   0  -1 612.073 63.2842   3
  -8   0  -1 707.018 102.233   5
   8   0   1 622.371 63.0035   2
   9   0   1 5793.52 177.489   2
  -9   0   1 5582.44 214.075   2
  -9   0  -1 6004.51 191.099   3
  -9   0  -1 5903.59 152.130   4
  -9   0   1 6147.92 144.316   4
   9   0   1 5642.49 176.781   3
  -9   0  -1 5989.65 178.301   2
   9   0  -1 6146.05 240.134   6
   9   0  -1 5705.30 231.272   5
   9   0   1 6100.17 215.724   6
  -9   0  -1 5815.98 208.926   6
  -9   0   1 5880.29 216.108   5
   9   0  -1 6144.44 246.329   3
 -10   0   1 5078.29 214.145   2
 -10   0   1 5580.08 162.486   4
  10   0   1 5388.90 182.843   2
  10   0   1 5538.59 218.888   6
 -10   0  -1 5278.77 182.555   2
 -10   0   1 5446.16 222.295   5
  10   0  -1 5453.63 242.029   3
  10   0   1 5558.42 188.410   3
 -10   0  -1 5361.50 213.346   6
 -10   0  -1 5428.86 148.406   4
 -10   0   1 5209.44 132.358   4
  10   0  -1 5848.86 250.600   5
 -10   0  -1 5279.48 194.979   3
  10   0  -1 5364.60 233.380   6
 -11   0  -1 143.386 60.5741   3
  11   0   1 267.639 77.9415   6
 -11   0   1 228.957 52.6684   4
 -11   0  -1 146.049 36.1787   4
 -11   0   1 200.108 71.3261   5
 -11   0  -1 76.5984 65.4308   6
  11   0   1 160.143 61.5981   2
 -11   0  -1 118.708 73.7911   5
  11   0  -1 202.944 76.0733   3
 -11   0   1 125.065 33.6002   4
  11   0  -1 120.029 64.4869   6
  11   0   1 163.402 54.7323   3
 -11   0   1 244.541 70.9307   2
 -11   0  -1 116.341 51.7585   2
 -12   0  -1 3837.61 194.095   3
 -12   0  -1 3824.43 178.562   2
 -12   0   1 3937.88 200.170   2
 -12   0  -1 4125.95 245.173   5
 -12   0   1 4248.94 216.407   5
 -12   0   1 3651.31 110.795   4
  12   0  -1 4038.62 225.683   3
  12   0   1 4134.54 210.588   6
  12   0   1 3989.69 175.094   2
  12   0  -1 3888.54 215.447   6
  12   0   1 4228.80 189.111   3
 -12   0  -1 4002.96 128.939   4
  13   0   1 3141.60 171.845   3
 -13   0  -1 2732.91 162.898   2
 -13   0   1 2778.68 177.437   2
 -13   0   1 3243.89 201.138   5
 -13   0   1 2825.85 96.9438   4
  13   0   1 2949.60 183.604   6
  13   0   1 2957.04 158.317   2
 -13   0  -1 3293.57 225.363   5
  13   0  -1 3303.18 213.281   3
 -13   0  -1 2998.35 112.575   4
  13   0  -1 3070.67 201.196   6
  14   0   1 2377.65 147.626   2
 -14   0   1 2507.54 175.217   2
  14   0   1 2482.15 177.865   6
 -14   0  -1 2491.70 108.018   4
  14   0  -1 2702.09 198.970   6
 -14   0   1 2148.89 87.4574   4
 -14   0  -1 2668.35 217.409   5
  14   0   1 2554.54 165.367   3
 -14   0   1 2844.98 196.232   5
  14   0  -1 2711.81 203.758   3
 -15   0   1 4652.05 124.246   4
 -15   0  -1 4896.50 148.185   4
 -15   0  -1 5310.25 303.107   5
  15   0   1 5350.12 240.046   3
  15   0  -1 5117.12 276.130   3
 -15   0   1 5063.13 248.516   2
 -15   0   1 5453.05 276.528   5
  15   0  -1 5183.88 272.950   6
  15   0   1 5011.35 252.057   6
  16   0  -1 1839.14 173.840   6
  16   0   1 1580.99 154.364   6
 -16   0   1 1589.16 76.2958   4
 -16   0   1 1710.11 167.390   5
 -16   0  -1 1847.66 199.440   5
  16   0  -1 1717.85 167.016   3
 -16   0  -1 1705.95 92.3485   4
 -16   0   1 1681.90 149.751   2
  16   0   1 1854.28 154.095   3
  17   0  -1 1207.06 149.837   6
  17   0  -1 1311.18 156.257   3
 -17   0   1 1151.45 66.6883   4
 -17   0  -1 1307.38 171.564   5
  17   0   1 1352.02 141.351   3
 -17   0   1 1564.01 170.865   5
 -17   0  -1 1204.35 79.9573   4
  17   0   1 1283.30 147.146   6
 -17   0   1 1353.98 140.362   2
 -18   0   1 2259.04 113.734   4
 -18   0  -1 2744.96 118.824   4
 -18   0   1 2531.77 96.5546   4
  18   0   1 2511.07 200.254   6
  18   0   1 2757.63 193.550   3
 -18   0   1 2877.13 220.622   5
 -18   0  -1 2536.32 238.278   5
 -18   0   1 2627.63 195.136   2
  18   0  -1 2588.30 210.184   6
  18   0  -1 2704.06 219.029   3
  19   0   1 197.227 87.1685   6
 -19   0   1 174.154 73.2049   2
 -19   0  -1 200.624 108.430   5
 -19   0   1 172.933 37.6932   4
  19   0  -1 329.976 101.270   3
 -19   0   1 36.6816 99.7358   5
 -19   0  -1 133.211 40.1528   4
  19   0  -1 245.383 89.2764   6
  19   0   1 264.766 86.1528   3
 -19   0   1 51.5870 43.3458   4
  20   0   1 7417.65 349.838   6
 -20   0  -1 7720.24 203.723   4
  20   0   1 7969.55 339.212   3
 -20   0   1 7949.59 389.898   5
 -20   0  -1 7785.03 421.173   5
 -20   0   1 7140.07 164.002   4
  20   0  -1 7855.18 386.537   3
 -20   0   1 7328.56 336.366   2
  20   0  -1 7840.19 372.186   6
 -20   0   1 5812.53 186.538   4
  21   0   1 1225.35 158.449   6
  21   0  -1 1307.28 177.430   6
 -21   0  -1 1231.36 89.9389   4
 -21   0   1 1198.36 74.3760   4
 -21   0  -1 1356.18 205.277   5
  21   0   1 1416.22 156.211   3
 -21   0   1 1298.13 179.036   5
  21   0  -1 1491.86 186.070   3
 -21   0   1 1032.10 87.7228   4
 -21   0   1 1165.74 142.582   2
 -22   0  -1 3808.31 156.960   4
 -22   0   1 3686.78 252.888   2
  22   0  -1 3986.73 296.048   3
 -22   0   1 3536.00 128.642   4
 -22   0   1 3067.79 145.317   4
  22   0   1 3769.33 264.730   6
 -22   0  -1 4245.64 344.334   5
  22   0  -1 3688.24 272.598   6
  22   0   1 3700.39 245.689   3
 -22   0   1 3886.70 291.396   5
 -23   0  -1 1112.31 200.699   5
 -23   0   1 1033.66 98.7260   4
 -23   0  -1 1007.86 91.8173   4
  23   0   1 1093.73 144.041   3
  23   0  -1 971.522 154.313   6
 -23   0   1 1195.83 186.856   5
 -23   0   1 1262.23 166.589   2
  23   0   1 894.859 146.585   6
 -23   0   1 1016.04 77.9950   4
  24   0   1 1837.79 196.481   6
 -24   0   1 2038.40 203.014   2
 -24   0  -1 1734.79 225.724   5
  24   0   1 1800.03 186.454   3
 -24   0   1 1579.81 117.266   4
 -24   0   1 1932.10 224.207   5
  24   0  -1 2029.96 215.173   6
 -24   0  -1 2080.70 124.199   4
 -24   0   1 1937.22 105.121   4
 -25   0  -1 1297.78 233.862   5
 -25   0   1 1144.45 160.462   2
 -25   0   1 841.701 94.3995   4
 -25   0  -1 1328.00 108.472   4
 -25   0   1 1081.94 90.3302   4
 -25   0   1 1131.09 194.957   5
  25   0   1 1015.86 173.140   6
  25   0   1 969.640 142.716   3
  26   0   1 3759.93 273.017   3
 -26   0   1 3391.78 265.278   2
 -26   0   1 3587.15 150.518   4
 -26   0  -1 3866.00 179.800   4
 -26   0   1 2862.49 160.810   4
  26   0   1 3200.50 271.485   6
 -26   0  -1 3431.90 330.450   5
 -26   0   1 3438.40 297.987   5
  27   0   1 2469.10 247.186   6
 -27   0  -1 2759.25 232.430   2
 -27   0   1 2729.48 277.683   5
 -27   0   1 2717.85 256.435   2
 -27   0  -1 2632.12 308.939   5
  27   0  -1 2779.32 288.160   3
 -27   0   1 2351.55 157.921   4
 -27   0   1 2463.02 134.193   4
  27   0   1 2683.88 238.088   3
 -27   0  -1 2567.28 153.103   4
  28   0  -1 148.064 146.452   3
 -28   0  -1 516.148 206.378   5
 -28   0   1 28.0054 118.226   5
 -28   0  -1 56.0066 67.1906   4
 -28   0   1 94.6158 80.3795   4
 -28   0   1-51.6772 98.4376   2
  28   0   1 190.748 122.166   6
 -28   0  -1 152.675 92.2377   2
 -29   0  -1-112.916 150.921   5
 -29   0   1 272.471 120.167   2
  29   0   1 282.952 127.383   6
 -29   0   1 237.017 94.5503   4
 -29   0  -1 119.264 96.2506   2
 -29   0   1 89.5077 139.784   5
  29   0  -1 191.328 151.743   3
 -29   0  -1 32.0322 68.3496   4
  29   0  -1 53.9396 122.448   6
  30   0  -1 3090.21 318.108   3
 -30   0   1 2684.02 259.747   2
 -30   0   1 3434.08 352.536   5
  30   0  -1 2683.57 287.588   6
 -30   0  -1 2898.16 330.728   5
 -30   0   1 2046.71 162.914   4
 -30   0  -1 2897.98 177.428   4
 -30   0  -1 2602.11 239.370   2
 -31   0   1-51.3982 174.750   5
 -31   0  -1 68.7134 102.509   2
 -31   0   1 32.0166 88.4485   4
  31   0  -1 56.5565 141.974   3
 -31   0  -1-83.7320 94.0595   4
  31   0  -1 67.0365 140.145   6
 -31   0  -1-87.4734 193.286   5
 -31   0   1-119.572 123.609   2
 -32   0   1 9780.98 493.340   2
  32   0  -1 9656.20 536.921   3
 -32   0   1 7233.86 301.878   4
  32   0  -1 8654.63 490.498   6
  32   0   1 9215.98 479.409   3
 -32   0  -1 9081.69 579.300   5
 -32   0  -1 9666.88 457.593   2
 -32   0  -1 8845.08 310.891   4
 -32   0   1 10185.5 573.871   5
 -33   0  -1 1182.70 260.649   5
 -33   0   1 657.766 122.762   4
 -33   0  -1 1204.39 146.725   4
 -33   0   1 1299.95 211.256   2
  33   0  -1 1081.55 225.359   3
 -33   0   1 1530.89 284.706   5
  33   0   1 1302.00 217.066   3
 -33   0  -1 1202.11 191.469   2
  33   0  -1 1228.64 223.131   6
 -34   0  -1 67.7757 207.045   5
  34   0  -1-107.445 145.115   6
 -34   0   1 266.230 214.052   5
 -34   0   1 81.3162 151.039   2
  34   0   1-1.03780 124.866   3
  34   0  -1 84.9378 157.625   3
  34   0   1 129.640 158.116   6
 -34   0  -1 56.5950 125.218   2
 -34   0  -1 124.554 110.852   4
 -35   0   1-139.908 236.874   5
  35   0   1 145.705 164.791   6
 -35   0  -1 28.5369 267.150   5
 -35   0   1 181.996 151.134   2
  35   0  -1 142.299 194.034   3
  35   0   1 84.1329 138.164   3
  35   0  -1 6.66597 153.624   6
 -35   0  -1-84.0225 155.095   2
 -36   0  -1 4691.97 353.510   2
 -36   0   1 4911.66 387.084   2
 -36   0   1 5556.82 509.744   5
  36   0   1 4321.00 355.722   3
  36   0  -1 4614.61 399.096   6
  36   0   1 4622.90 390.845   6
  36   0  -1 5224.79 448.899   3
 -36   0  -1 4848.58 492.655   5
 -37   0  -1 175.614 181.133   2
  37   0  -1 74.4858 186.927   3
  37   0   1 172.882 169.681   3
  37   0  -1 101.361 160.120   6
 -37   0  -1 280.698 280.347   5
  37   0   1 105.056 164.180   6
 -37   0   1 246.806 255.139   5
 -37   0   1 141.869 185.304   2
 -38   0  -1 1514.73 365.895   5
 -38   0   1 1908.57 368.640   5
  38   0  -1 1745.36 300.484   3
  38   0  -1 1437.55 263.507   6
 -38   0  -1 1340.35 243.112   2
  38   0   1 1533.76 253.183   3
  38   0   1 1502.97 273.615   6
 -38   0   1 1806.76 271.291   2
  39   0  -1 899.122 241.825   6
 -39   0   1 1164.62 324.242   5
  39   0  -1 1103.18 279.141   3
 -39   0   1 1147.69 247.423   2
  39   0   1 885.053 238.925   6
 -39   0  -1 1185.76 355.588   5
 -39   0  -1 1150.92 251.959   2
  39   0   1 957.094 233.587   3
  40   0  -1 3472.89 379.825   6
 -40   0   1 4361.37 511.517   5
  40   0   1 3292.11 345.058   6
 -40   0   1 4013.33 387.092   2
  40   0   1 4083.73 387.657   3
  40   0  -1 4025.63 418.835   3
 -40   0  -1 4475.68 541.593   5
 -40   0  -1 4243.75 388.102   2
 -41   0  -1 200.920 343.489   5
  41   0  -1-182.152 205.116   3
  41   0  -1-138.667 202.217   6
 -41   0  -1 169.212 208.485   2
  41   0   1 317.968 200.175   3
 -41   0   1 95.9593 316.471   5
  41   0   1 235.677 191.957   6
 -41   0   1 76.8254 195.456   2
 -42   0   1-108.698 214.197   2
 -42   0  -1-430.076 362.190   5
 -42   0  -1-851.288 316.135   2
  42   0   1-314.664 220.570   3
  42   0   1-106.911 201.761   6
 -42   0   1-391.739 347.276   5
  42   0  -1-44.5680 197.318   3
  42   0  -1-89.0127 186.637   6
 -43   0   1-12.4735 221.404   2
  43   0   1 105.698 209.844   3
 -43   0   1 494.877 369.361   5
  43   0   1-188.466 209.498   6
  43   0  -1 139.531 199.144   6
 -43   0  -1-239.606 356.574   5
  43   0  -1 192.379 210.719   3
  43   1   1-88.3415 188.915   3
 -43  -1   1 194.466 213.155   2
  43   1   1 142.159 193.527   6
  43  -1  -1-3.03412 182.404   6
  43  -1  -1 144.638 219.762   3
 -43   1  -1-11.4046 355.117   5
 -43  -1   1 304.452 359.088   5
 -42  -1   1-527.809 258.945   2
  42  -1  -1-323.589 198.536   6
  42   1   1-55.9763 217.119   6
  42  -1  -1 44.6038 179.898   3
  42   1   1 170.038 199.851   3
 -42   1  -1 584.812 384.538   5
 -42  -1   1 308.160 321.393   5
  41   1   1 95.0226 179.097   3
  41  -1  -1 491.695 235.030   3
 -41   1  -1 45.4658 347.017   5
  41   1   1 362.980 225.386   6
 -41  -1   1 149.820 282.933   5
  41  -1  -1 372.485 209.564   6
 -41  -1   1 393.053 226.443   2
 -40   1  -1 799.353 364.946   5
  40   1   1 525.449 224.752   6
 -40   1  -1 682.582 213.417   2
 -40  -1   1 583.625 314.189   5
  40   1   1 575.401 215.635   3
 -40  -1   1 569.080 208.529   2
  40  -1  -1 541.663 211.988   6
  40  -1  -1 567.443 214.688   3
 -39   1  -1 953.926 343.262   5
  39  -1  -1 1242.09 264.552   3
  39   1   1 814.420 221.395   3
 -39   1  -1 1126.06 238.864   2
  39   1   1 1077.82 248.177   6
 -39  -1   1 1394.95 342.010   5
  39  -1  -1 1493.20 265.915   6
 -39  -1   1 1103.06 255.296   2
 -38  -1   1 1492.10 334.873   5
 -38   1  -1 1460.02 381.471   5
  38  -1  -1 1351.09 250.479   6
  38   1   1 1598.02 269.582   3
  38   1   1 1426.49 280.097   6
 -38   1  -1 1574.72 257.874   2
  38  -1  -1 1374.63 247.803   3
 -38  -1   1 1729.94 280.850   2
  37   1   1 172.332 143.342   3
 -37  -1   1-110.240 176.135   2
 -37   1  -1 319.223 275.992   5
  37   1   1-62.1846 172.526   6
  37  -1  -1 347.823 199.273   6
 -37   1  -1-141.680 170.379   2
 -37  -1   1 162.446 247.450   5
  37  -1  -1 257.886 189.743   3
 -36  -1   1 243.219 185.129   2
  36   1   1 391.000 222.612   6
 -36   1  -1 14.3913 145.573   2
  36   1   1 26.7848 148.562   3
  36  -1  -1 62.5596 168.614   3
 -36   1  -1 59.6804 225.675   5
 -36  -1   1 74.5914 225.643   5
  36  -1  -1 242.811 170.471   6
 -35  -1   1 689.694 256.919   5
  35  -1  -1 601.087 221.056   3
  35  -1  -1 314.806 171.826   6
 -35   1  -1 257.782 162.231   2
  35   1   1 249.092 163.555   3
 -35   1  -1 507.021 272.431   5
  35   1   1 2.46388 171.691   6
 -35  -1   1 465.431 193.652   2
 -34  -1   1 2063.05 320.931   5
  34   1   1 1455.75 232.833   3
 -34  -1   1 1808.95 205.179   4
  34  -1  -1 1567.87 262.003   3
 -34  -1   1 1824.92 259.790   2
 -34   1  -1 1725.26 314.516   5
  34   1   1 1399.87 252.785   6
  34  -1  -1 1452.61 245.774   6
 -34   1  -1 1847.67 226.351   2
  33  -1  -1-82.5015 154.414   3
 -33   1  -1 107.203 82.0595   4
  33   1   1-114.410 155.940   6
  33  -1  -1 67.1802 139.555   6
 -33  -1   1-45.2548 196.562   5
 -33  -1   1-60.0129 128.898   2
  33   1   1-75.5807 120.957   3
 -33   1  -1 1.66227 193.872   5
 -33   1  -1-109.091 106.911   2
 -33  -1   1 7.70912 122.915   4
 -32  -1   1 218.222 130.993   2
  32  -1  -1 210.444 159.449   3
  32  -1  -1 26.6034 142.475   6
 -32  -1   1 163.998 186.830   5
 -32   1  -1 26.4735 71.4510   4
  32   1   1 173.838 146.947   6
 -32   1  -1 31.7373 206.817   5
 -32  -1   1-241.033 139.606   4
 -32   1  -1 45.1455 94.0852   2
  32   1   1 44.4550 121.886   3
 -31   1  -1 825.619 236.335   5
  31   1   1 720.650 171.712   3
  31  -1  -1 578.595 189.879   3
 -31  -1   1 156.609 111.060   4
  31  -1  -1 534.668 166.324   6
 -31   1  -1 597.957 143.050   2
 -31  -1   1 474.482 156.017   2
 -31  -1   1 504.481 184.491   5
 -31   1  -1 527.363 89.6177   4
  30  -1  -1 337.460 163.879   3
 -30   1  -1 2.64587 147.304   5
 -30   1  -1 246.839 65.2913   4
 -30  -1   1 477.519 139.552   2
 -30  -1   1 413.853 123.276   4
  30  -1  -1 241.450 133.188   6
 -30  -1   1 400.118 160.716   5
 -30   1  -1 457.808 135.249   2
 -29   1  -1 451.585 111.438   2
 -29  -1   1 380.319 125.697   2
 -29  -1   1 309.722 109.440   4
 -29   1  -1 439.294 76.1488   4
  29  -1  -1 538.782 163.574   3
 -29  -1   1 503.860 188.839   5
 -29   1  -1 670.770 225.222   5
 -28   1  -1 2763.25 141.501   4
 -28   1  -1 3262.41 246.673   2
 -28  -1   1 3190.82 324.057   5
 -28  -1   1 2870.10 198.104   4
  28  -1  -1 3308.75 309.000   3
 -28   1  -1 3002.82 313.860   5
 -28  -1   1 2971.21 263.003   2
  27   1   1 567.115 131.495   3
  27   1   1 623.668 157.655   6
 -27  -1   1 626.981 146.920   2
  27  -1  -1 639.193 176.612   3
 -27   1  -1 580.425 173.729   5
 -27   1  -1 597.573 120.088   2
 -27  -1   1 497.252 166.336   5
 -27  -1   1 585.034 116.003   4
 -27   1  -1 548.643 72.4004   4
  26   1   1 2619.04 237.717   3
 -26  -1   1 2521.95 266.277   5
 -26   1  -1 2631.03 212.238   2
 -26   1  -1 2523.49 284.497   5
  26   1   1 2383.34 245.517   6
 -26  -1   1 2241.72 171.644   4
 -26  -1   1 2756.55 249.602   2
 -26   1  -1 2406.88 123.360   4
 -25  -1   1 1342.01 140.941   4
 -25   1  -1 1573.09 231.184   5
 -25   1  -1 1181.27 88.2289   4
  25  -1  -1 1555.82 199.496   6
 -25  -1   1 1283.86 175.371   2
 -25  -1   1 1491.74 218.517   5
  25   1   1 1352.20 194.650   6
  25   1   1 1257.30 169.789   3
 -25   1  -1 1388.21 160.097   2
  24   1   1 2507.73 236.224   6
 -24   1  -1 2308.58 109.255   4
 -24   1  -1 2521.96 276.787   5
  24   1   1 2548.85 223.643   3
 -24  -1   1 2244.44 162.525   4
 -24   1  -1 2336.62 187.210   2
 -24  -1   1 2547.35 265.030   5
  24  -1  -1 2408.94 223.096   6
 -24  -1   1 2438.71 220.151   2
  23   1   1-56.9669 102.907   6
 -23  -1   1 113.468 83.5313   2
  23  -1  -1 76.6830 84.8038   6
 -23  -1   1 25.7402 69.8833   4
 -23   1  -1 213.429 148.171   5
 -23   1  -1 48.7266 61.1041   2
 -23   1  -1 96.5246 41.9124   4
  23  -1  -1-54.6473 82.0186   3
 -23  -1   1 158.644 125.857   5
  23   1   1-4.54636 85.6599   3
 -22   1  -1 1123.50 132.567   2
 -22  -1   1 1099.22 118.515   4
  22   1   1 887.075 156.133   6
  22  -1  -1 912.175 147.534   3
 -22  -1   1 1002.36 168.747   5
 -22   1  -1 942.096 179.214   5
  22   1   1 884.245 137.649   3
 -22  -1   1 938.281 136.471   2
 -22   1  -1 888.526 66.9100   4
  22  -1  -1 912.722 145.930   6
 -21   1  -1 285.538 47.5397   4
  21   1   1 445.287 123.525   6
  21  -1  -1 531.246 118.308   6
 -21  -1   1 344.733 68.3920   4
  21   1   1 465.229 106.888   3
 -21  -1   1 323.803 77.9744   4
 -21  -1   1 406.150 113.034   2
 -21   1  -1 194.723 76.9270   2
 -21  -1   1 171.259 116.998   5
 -21   1  -1 384.251 136.885   5
  21  -1  -1 425.994 115.536   3
 -20  -1   1 45.5209 52.0360   4
  20  -1  -1-35.4966 75.0126   6
 -20   1  -1 77.2121 33.3303   4
  20   1   1 268.641 93.6728   3
 -20  -1   1 46.9865 52.9984   4
 -20  -1   1 100.941 79.9909   2
  20   1   1 121.237 97.4444   6
 -20   1  -1 20.8507 104.833   5
  20  -1  -1 5.96345 71.2856   3
 -20  -1   1 95.7634 89.0505   5
  19   1   1 487.388 105.131   3
  19  -1  -1 441.584 101.764   3
 -19  -1   1 478.464 115.782   5
  19   1   1 357.014 110.067   6
 -19   1  -1 510.360 123.866   5
 -19   1  -1 433.550 48.0771   4
 -19  -1   1 609.126 114.841   2
 -19  -1   1 850.835 87.5628   4
 -19  -1   1 522.242 81.0315   4
  19  -1  -1 445.809 110.166   6
  18   1   1 1099.84 151.364   6
 -18   1  -1 1164.61 167.817   5
  18   1   1 1032.19 123.867   2
 -18  -1   1 1127.58 87.5439   4
  18  -1  -1 1213.16 155.011   3
  18   1   1 1018.65 126.811   3
  18  -1  -1 1160.27 146.841   6
 -18   1  -1 900.481 61.7943   4
 -18  -1   1 953.567 96.7501   4
 -18  -1   1 1291.17 166.890   5
 -18  -1   1 1115.74 139.314   2
 -17  -1   1 705.066 75.9292   4
 -17  -1   1 746.217 123.138   2
 -17   1  -1 579.166 123.676   5
  17   1   1 745.383 114.218   3
  17  -1  -1 789.535 125.460   6
 -17   1  -1 543.561 52.5775   4
  17  -1  -1 863.805 129.376   3
 -17  -1   1 780.790 138.087   5
 -17  -1   1 503.454 68.0905   4
  17   1   1 652.178 98.7477   2
  17   1   1 752.949 123.433   6
 -16  -1   1 44017.1 823.707   5
  16  -1  -1 42671.0 755.850   6
 -16  -1   1 44232.7 479.391   4
  16   1   1 42102.1 702.181   3
 -16   1  -1 44681.5 862.498   5
 -16  -1   1 41257.3 743.092   2
  16  -1  -1 43905.5 804.602   3
  16   1   1 41788.7 770.047   6
 -16   1  -1 38759.3 371.646   4
 -16  -1   1 43441.9 559.179   4
  16   1   1 40897.9 672.912   2
  15   1   1 4085.61 246.002   6
 -15  -1   1 4174.94 235.426   2
  15  -1  -1 4100.99 247.239   3
  15   1   1 3931.76 209.544   3
  15  -1  -1 4094.31 236.086   6
 -15  -1   1 4217.07 151.468   4
 -15   1  -1 3756.89 117.847   4
 -15   1  -1 4171.88 263.672   5
 -15   1  -1 4545.27 220.667   2
  15   1   1 4011.75 209.747   2
 -15  -1   1 4163.27 178.466   4
 -15  -1   1 4348.35 259.135   5
 -14  -1   1 782.312 70.9483   4
 -14   1  -1 848.243 131.552   5
 -14   1  -1 633.935 51.7252   4
 -14  -1   1 693.983 104.177   2
  14   1   1 630.487 103.800   6
  14   1   1 865.468 110.046   2
 -14   1  -1 559.246 84.4103   2
  14  -1  -1 778.444 118.372   3
  14  -1  -1 794.883 116.034   6
  14   1   1 728.654 95.8839   3
 -14  -1   1 753.198 84.3874   4
 -14  -1   1 784.815 119.112   5
 -13  -1   1 2719.56 194.426   5
 -13   1  -1 2138.08 156.196   6
  13  -1  -1 2405.44 172.490   6
 -13  -1   1 2579.54 116.660   4
 -13   1  -1 2548.34 165.669   3
  13   1   1 2356.43 156.332   3
 -13   1  -1 2327.50 95.5193   4
 -13   1  -1 2451.65 142.382   2
 -13  -1   1 2572.80 137.846   4
  13   1   1 2432.22 158.831   2
 -13   1  -1 2375.25 190.926   5
  13  -1  -1 2502.38 189.534   3
  13   1   1 2487.71 183.474   6
 -13  -1   1 2708.54 186.934   2
 -12  -1   1 159138. 1046.94   4
 -12  -1   1 142325. 1290.52   5
 -12   1  -1 141909. 1335.53   5
 -12  -1   1 143456. 809.220   4
 -12   1  -1 147870. 980.335   2
 -12   1  -1 137014. 1035.45   3
 -12   1  -1 140290. 702.587   4
  12   1   1 151993. 1324.68   6
 -12  -1   1 136393. 1209.46   2
 -12   1  -1 140172. 1095.39   6
  12  -1  -1 138660. 1182.45   6
  12  -1  -1 148038. 1311.55   3
  12   1   1 139785. 1088.47   2
  12   1   1 142201. 1118.03   3
  11  -1  -1 652.109 90.9297   6
 -11  -1   1 946.349 113.968   2
 -11   1  -1 976.213 68.6855   4
 -11   1  -1 829.016 78.5204   2
 -11  -1   1 889.971 92.1038   4
  11   1   1 719.079 54.5959   4
  11  -1  -1 774.916 105.397   5
  11   1   1 724.020 84.7485   3
  11  -1  -1 788.318 106.764   3
 -11  -1   1 695.109 99.3634   5
 -11  -1   1 864.261 73.4922   4
  11   1   1 754.310 98.2080   6
  11   1   1 771.680 86.6243   2
 -11   1  -1 556.256 73.5482   6
 -11   1  -1 789.735 89.8017   3
 -10   1  -1 493.441 59.8781   2
  10  -1  -1 531.624 83.3398   5
 -10   1  -1 578.943 81.4189   6
 -10  -1   1 472.107 82.4110   5
  10   1   1 483.659 71.6963   2
 -10  -1   1 587.624 87.0787   2
  10   1   1 460.379 73.0372   3
 -10   1  -1 445.168 67.3576   3
  10   1   1 482.188 48.2096   4
 -10  -1   1 453.599 55.2844   4
  10  -1  -1 532.995 81.9003   6
 -10  -1   1 884.555 95.2368   4
 -10   1  -1 546.587 55.1990   4
  10  -1  -1 441.192 87.1850   3
  10   1   1 577.807 88.5292   6
  -9   1  -1 192.977 43.0532   2
  -9  -1   1 176.480 64.3515   5
  -9  -1   1 166.458 56.7676   4
   9  -1  -1 158.493 59.9470   5
  -9   1  -1 122.566 45.6644   6
  -9   1  -1 92.0262 66.2719   5
  -9   1  -1 331.319 52.8364   4
   9   1   1 198.252 67.5209   6
  -9  -1   1 261.987 50.9221   4
   9   1   1 159.805 38.1808   4
  -9   1  -1 150.240 46.3613   3
  -9  -1   1 159.394 62.7088   2
   9  -1  -1 111.074 57.6931   3
   9  -1  -1 138.696 48.6520   6
   9   1   1 199.049 54.9623   2
   9   1   1 183.597 53.1339   3
  -8   1  -1 101731. 701.148   6
  -8  -1   1 94416.6 880.920   2
   8  -1  -1 97166.0 845.890   6
   8   1   1 87664.8 736.125   2
  -8   1  -1 98746.5 867.696   5
   8   1   1 98423.0 869.331   6
   8  -1  -1 100810. 927.537   3
  -8   1  -1 96815.9 629.137   3
   8   1   1 96488.0 748.526   3
  -8   1  -1 96733.8 547.191   2
  -8   1  -1 100446. 608.790   4
   8  -1  -1 103288. 806.829   5
  -8  -1   1 108835. 780.348   4
  -8  -1   1 95574.2 879.674   5
  -8  -1   1 100125. 656.330   4
   8   1   1 97802.6 631.178   4
   7  -1  -1 582.153 66.5270   5
  -7  -1   1 165.260 77.9615   6
  -7  -1   1 539.798 75.6139   5
  -7  -1   1 575.203 81.3633   2
   7  -1  -1 544.149 75.8731   3
   7   1   1 674.374 61.5994   4
   7   1   1 671.459 68.2184   2
  -7   1  -1 649.381 59.0999   4
   7  -1  -1 626.569 77.4121   6
   7  -1  -1 578.881 73.7401   2
   7   1   1 652.215 67.3075   3
  -7   1  -1 514.602 50.1665   3
  -7  -1   1 550.355 58.2376   4
  -7  -1   1 60.9493 63.4032   3
  -7   1  -1 592.392 58.5917   6
   7   1   1 582.261 77.7142   6
  -7   1  -1 532.456 75.9501   5
  -6  -1   1 77.0698 43.7261   3
   6   1   1 58.7941 34.1862   3
   6  -1  -1 75.2881 37.7108   6
   6   1   1 69.4600 41.0526   6
  -6  -1   1 45.6677 32.5035   4
   6   1   1 110.087 35.5443   4
   6  -1  -1 74.6618 38.0434   3
   6  -1  -1 144.166 43.9044   5
  -6   1  -1 87.7558 28.7538   6
  -6   1  -1 110.188 36.2926   4
   6   1   1 46.6073 30.5218   2
  -6  -1   1 67.8958 38.4487   5
  -6   1  -1 54.5392 37.1587   5
  -6  -1   1 36.5400 52.2149   6
   6  -1  -1 58.6637 42.7261   2
  -6  -1   1 101.498 44.8470   2
   5   1   1 77.1993 36.7617   6
   5  -1  -1 55.8396 29.4271   5
   5   1   1 75.6810 28.7339   2
  -5  -1   1 42.0368 33.2630   2
   5  -1  -1 63.9662 32.4464   6
  -5   1  -1 118.360 40.2640   5
   5  -1  -1 42.1383 33.6361   3
   5   1   1 69.2787 42.4124   5
   5   1   1 98.1368 31.6989   4
   5  -1  -1 99.1223 38.1141   2
  -5   1  -1 114.855 31.7806   4
  -5  -1   1 130.331 34.1229   4
  -5  -1   1 128.731 39.9653   5
  -5  -1   1 34.8726 42.8182   6
  -5  -1   1 67.8868 39.4281   3
   4   1   1 37153.8 478.192   5
   4   1   1 36589.8 365.107   2
   4   1   1 37284.7 427.374   6
   4  -1  -1 37834.8 402.217   4
  -4   1  -1 34433.8 372.241   4
   4  -1  -1 38579.1 351.160   5
  -4  -1   1 36714.3 398.157   4
   4  -1  -1 29942.5 392.098   6
  -4  -1   1 34630.8 431.022   2
   4   1   1 36110.0 410.935   4
  -4   1  -1 36244.5 410.100   5
  -4  -1   1 36557.3 478.875   6
   4  -1  -1 37179.7 434.044   2
  -4  -1   1 37087.8 434.168   5
   4  -1  -1 37728.6 460.736   3
  -4  -1   1 37573.4 484.568   3
   3  -1  -1 557.314 56.2538   3
   3   1   1 538.515 45.6544   2
  -3  -1   1 566.795 61.5185   6
   3  -1  -1 572.363 54.8135   6
  -3   1  -1 576.800 51.8188   4
   3   1   1 525.691 61.0497   5
   3  -1  -1 578.237 56.7502   4
  -3  -1   1 644.870 65.1351   3
   3  -1  -1 584.173 45.1893   5
   3   1   1 515.579 51.2797   6
  -3  -1   1 626.715 58.5005   5
  -3   1  -1 575.275 53.4773   5
   3  -1  -1 577.781 55.5196   2
  -3  -1   1 619.583 54.8554   4
  -3  -1   1 529.034 54.5803   2
   3   1   1 568.689 56.3042   4
   2   1   1 80.7708 30.9267   5
  -2  -1   1 126.223 33.7546   3
  -2  -1   1 88.6005 33.5018   6
  -2  -1   1 119.450 29.1436   5
   2  -1  -1 104.575 24.1131   5
   2  -1  -1 81.9540 26.3504   2
  -2   1  -1 110.878 30.1339   4
   2  -1  -1 68.4100 25.0146   3
  -2  -1   1 121.294 30.9155   2
   2   1   1 86.2905 32.0481   4
   2  -1  -1 94.8282 27.4013   6
  -2  -1   1 100.539 28.7231   4
   2   1   1 87.5469 20.9806   2
   2   1   1 112.508 30.8917   6
   2  -1  -1 58.1981 29.5190   4
  -2   1  -1 111.621 27.3873   5
  -1  -1   1 45.4131 23.8261   4
   1   1   1 53.0190 26.4319   4
   1  -1  -1 80.0236 29.9120   4
  -1  -1   1 95.6670 28.4753   6
  -1  -1   1 42.9537 21.6953   3
  -1   1  -1-7.46444 12.7595   6
  -1  -1   1 72.1579 23.7245   2
   1   1   1 68.3623 25.9222   5
  -1   1  -1 75.5064 27.2940   4
   1  -1  -1 103.912 24.1205   3
   1   1   1 87.3057 25.8787   6
   1  -1  -1 91.3855 23.5552   5
  -1   1  -1 57.4730 24.3893   5
   1   1   1 75.8943 20.4169   2
  -1  -1   1 114.848 27.9685   5
   1  -1  -1 55.1429 22.3015   2
   0   1   1 69951.5 484.007   5
   0   1   1 84187.9 510.173   3
   0   1  -1 61716.6 500.126   4
   0  -1  -1 86678.4 541.219   5
   0  -1   1 66289.9 533.169   4
   0   1   1 83703.3 516.477   2
   0   1   1 66124.8 561.339   4
   0  -1   1 80366.8 473.711   2
   0  -1  -1 38519.8 342.805   3
   0  -1   1 79550.4 521.196   5
   0   1  -1 75714.4 520.820   5
   0  -1   1 84396.3 523.682   6
   0   1  -1 36007.3 333.459   6
  -1  -1  -1 18.3060 17.1706   2
  -1   1   1 94.4821 25.8091   3
  -1   1   1 42.2435 17.8286   5
  -1   1   1 92.3477 24.2547   6
   1  -1   1 92.5259 22.3540   6
  -1  -1  -1 72.8627 26.9268   5
   1   1  -1 95.7624 29.5108   5
  -1  -1  -1 70.7953 28.1050   4
   1  -1   1 82.2407 27.1152   4
   1   1  -1 9.64789 14.8104   2
  -1   1   1 84.0517 23.9135   2
   1   1  -1 83.0214 26.2466   4
   1  -1   1 57.5511 21.9954   5
  -1  -1  -1 25.0021 22.6506   6
   1   1  -1 100.390 26.2994   6
  -1   1   1 24.4919 22.1277   4
   1   1  -1 68.8470 22.5794   3
   2   1  -1 100.242 28.5892   2
  -2  -1  -1 29.8792 16.4395   2
   2  -1   1 135.624 32.2702   4
  -2   1   1 88.0294 29.9148   3
   2   1  -1 123.482 31.6209   4
   2   1  -1 78.7173 25.0426   6
  -2   1   1 93.8465 26.7279   2
   2  -1   1 111.045 28.2714   5
  -2   1   1 101.112 26.6893   6
   2   1  -1 118.810 31.2385   5
  -2   1   1 111.548 21.5025   5
   2   1  -1 104.980 30.1132   3
  -2  -1  -1 62.3601 28.5770   5
  -2  -1  -1 64.8036 25.6049   6
  -2   1   1 113.268 30.3206   4
  -2  -1  -1 101.627 32.1265   4
  -3   1   1 523.524 54.4926   6
  -3   1   1 574.916 53.1036   2
  -3  -1  -1 529.114 53.0556   6
  -3  -1  -1 549.308 55.3932   4
   3   1  -1 656.217 64.1186   3
  -3   1   1 605.546 44.5773   5
   3   1  -1 605.669 61.4423   5
  -3  -1  -1 525.039 60.4059   5
  -3  -1  -1 529.160 45.1545   2
   3  -1   1 615.450 55.3455   5
  -3   1   1 596.985 58.8604   3
   3   1  -1 611.530 53.6879   4
   3   1  -1 635.957 59.6020   2
  -3   1   1 605.394 57.3326   4
   3   1  -1 584.580 60.8507   6
   4   1  -1 35674.9 445.972   2
   4   1  -1 35881.3 440.756   5
  -4   1   1 37694.2 330.320   5
   4  -1   1 36696.5 411.819   5
  -4   1   1 36630.4 398.660   4
  -4   1   1 38506.1 445.583   6
  -4   1   1 36660.3 455.736   3
  -4  -1  -1 36436.5 358.017   2
  -4  -1  -1 36915.0 424.461   6
   4   1  -1 35716.3 457.790   6
   4   1  -1 29119.3 428.178   3
  -4   1   1 35057.3 405.558   2
   4   1  -1 35225.2 372.647   4
  -4  -1  -1 37830.1 496.844   5
  -4  -1  -1 37693.9 438.220   4
   5   1  -1 99.2248 43.6116   3
  -5  -1  -1 76.3692 31.3883   2
  -5  -1  -1 90.1831 49.4825   5
   5   1  -1 126.529 31.0707   4
  -5   1   1 97.8072 35.8621   2
   5   1  -1 68.3827 34.0896   6
   5  -1   1 124.155 42.4974   5
  -5   1   1 142.742 35.2065   4
  -5  -1  -1 35.8161 30.0819   4
  -5   1   1 63.5884 38.7147   3
  -5   1   1 133.632 43.9875   6
  -5   1   1 74.4411 27.6931   5
  -5  -1  -1 75.4556 39.0250   6
   5   1  -1 144.576 54.3815   5
  -6  -1  -1 16.0329 31.3494   4
  -6   1   1 84.2457 48.2934   3
   6   1  -1 109.409 32.4495   4
  -6  -1  -1 58.4107 32.0389   2
  -6  -1  -1 67.9528 43.3251   6
   6   1  -1 36.3005 46.1769   5
   6  -1   1 79.3258 32.5499   6
   6  -1   1 117.976 47.2444   5
  -6   1   1 78.2130 32.0058   5
  -6  -1  -1 61.5220 53.1442   5
   6   1  -1 93.5876 41.7949   6
  -6   1   1 101.186 38.1681   4
  -6   1   1 75.8409 35.2627   2
   6   1  -1 113.105 49.5880   3
  -6   1   1 11.1423 35.3243   6
   6   1  -1 13.1298 38.2660   4
   7   1  -1 680.715 78.0174   4
  -7   1   1 63.4831 62.8802   3
  -7   1   1 673.204 63.8102   5
   7  -1   1 514.509 55.6437   6
  -7  -1  -1 597.738 65.1643   2
  -7   1   1 515.517 50.2757   4
   7  -1   1 600.866 51.6538   3
   7   1  -1 483.227 83.6506   5
   7   1  -1 516.625 49.2371   4
  -7  -1  -1 605.844 79.6124   6
  -7   1   1 525.756 76.9819   6
   7   1  -1 503.370 83.8023   3
   7   1  -1 451.431 73.9234   6
  -7   1   1 598.213 72.5126   2
  -7  -1  -1 667.418 70.1581   4
  -7  -1  -1 718.302 106.883   5
   7  -1   1 576.634 74.9093   5
  -8  -1  -1 98736.5 1028.06   5
  -8  -1  -1 97965.6 755.833   2
   8   1  -1 102755. 591.048   4
  -8  -1  -1 100011. 882.260   6
   8  -1   1 95684.6 849.087   5
   8   1  -1 100935. 961.756   3
   8   1  -1 112980. 1017.54   5
   8   1  -1 114304. 778.161   4
  -8   1   1 95829.5 823.591   2
  -8   1   1 98096.1 717.988   5
   8  -1   1 97347.4 609.158   3
   8  -1   1 97969.8 695.711   6
  -8  -1  -1 99506.4 720.056   4
   8   1  -1 100167. 958.760   6
  -9  -1  -1 223.606 52.9232   4
   9   1  -1 208.565 76.5334   3
   9   1  -1 108.943 46.2109   4
  -9  -1  -1 125.726 48.7963   3
   9  -1   1 134.895 35.6091   2
   9  -1   1 226.513 59.8095   6
   9  -1   1 233.070 50.4044   3
  -9   1   1 123.519 52.4409   2
  -9  -1  -1 48.7858 65.4296   5
   9   1  -1 144.003 64.9418   6
   9   1  -1 177.742 35.6774   4
  -9  -1  -1 218.922 76.3013   6
  -9   1   1 132.664 51.1448   5
  -9  -1  -1 172.383 56.9147   2
 -10   1   1 550.583 81.6593   2
 -10  -1  -1 407.553 70.6633   2
 -10  -1  -1 520.330 67.3693   4
 -10   1   1 544.544 78.4071   5
 -10  -1  -1 562.122 104.471   5
 -10  -1  -1 442.484 72.9884   3
  10  -1   1 555.238 67.9303   3
 -10  -1  -1 238.728 82.6413   6
  10  -1   1 542.945 80.6820   6
  10   1  -1 623.345 97.2619   3
  10   1  -1 572.294 101.982   6
  11   1  -1 960.261 131.653   6
 -11   1   1 775.331 92.9226   2
 -11  -1  -1 623.359 104.831   5
 -11  -1  -1 707.878 93.1635   3
  11  -1   1 811.772 90.5112   6
 -11  -1  -1 721.517 78.4506   4
 -11   1   1 808.658 96.4871   5
 -11  -1  -1 612.988 85.6321   2
 -12   1   1 138666. 1136.64   2
  12  -1   1 137840. 1057.89   6
  12  -1   1 141977. 998.457   3
  12   1  -1 142943. 1318.62   3
 -12  -1  -1 146601. 1472.98   5
 -12  -1  -1 148195. 916.039   4
 -12   1   1 146425. 1159.55   5
  12   1  -1 142664. 1329.55   6
 -13   1   1 2758.35 176.321   5
  13  -1   1 2679.52 155.138   3
 -13   1   1 2412.68 162.534   2
 -13  -1  -1 2630.68 130.265   4
  13   1  -1 2623.31 203.825   6
  13   1  -1 2721.42 199.490   3
 -13  -1  -1 2409.38 202.376   5
  13  -1   1 2507.02 158.212   6
 -14   1   1 728.218 98.9626   5
  14  -1   1 742.952 91.5256   3
  14  -1   1 666.612 92.1032   6
  14   1  -1 783.277 118.900   3
 -14  -1  -1 750.587 125.034   5
 -14  -1  -1 922.634 84.5395   4
 -14   1   1 702.620 95.4334   2
  14   1  -1 772.623 120.060   6
  15  -1   1 4184.71 205.224   3
  15   1  -1 4069.08 254.499   6
 -15   1   1 3852.76 210.119   2
  15  -1   1 4166.94 217.575   6
 -15   1   1 4503.25 240.180   5
 -15  -1  -1 4217.27 281.224   5
  15   1  -1 4221.25 256.145   3
 -15  -1  -1 4366.98 170.828   4
 -16  -1  -1 43317.4 906.046   5
 -16   1   1 41387.4 700.005   2
  16   1  -1 44613.8 834.970   3
  16  -1   1 43208.1 664.206   3
 -16  -1  -1 45569.1 546.054   4
 -16   1   1 45175.7 765.556   5
  16   1  -1 42215.7 809.390   6
  16  -1   1 41917.2 694.537   6
  17   1  -1 693.477 125.060   3
  17  -1   1 655.054 103.259   3
 -17   1   1 780.281 124.344   5
 -17   1   1 819.925 118.986   2
 -17  -1  -1 708.975 138.707   5
  17   1  -1 673.017 133.585   6
  17  -1   1 679.372 109.347   6
 -17  -1  -1 763.517 86.6699   4
  18  -1   1 1037.12 133.985   6
 -18   1   1 1122.74 131.277   2
  18  -1   1 1188.47 129.791   3
 -18   1   1 1177.27 149.738   5
  18   1  -1 1140.56 157.512   6
 -18  -1  -1 1057.00 166.552   5
  18   1  -1 1248.43 161.397   3
 -18  -1  -1 1156.25 98.6510   4
  19   1  -1 515.370 116.754   3
 -19  -1  -1 415.929 142.790   5
  19   1  -1 517.130 115.061   6
 -19  -1  -1 386.900 69.3616   4
  19  -1   1 640.805 112.113   6
  19  -1   1 509.619 95.3166   3
 -19   1   1 471.406 117.438   5
 -19   1   1 534.467 105.870   2
  20   1  -1 109.514 81.2774   6
 -20  -1  -1 230.471 129.021   5
 -20   1   1 157.441 84.3649   2
  20  -1   1 77.0500 60.1155   3
 -20   1   1-42.0441 105.102   5
  20  -1   1-31.9287 72.3906   6
 -20  -1  -1 162.241 59.6840   4
  20   1  -1 169.374 89.9113   3
  21   1  -1 296.906 116.803   6
 -21  -1  -1 583.343 154.206   5
 -21  -1  -1 566.928 86.9770   4
  21   1  -1 299.005 109.692   3
  21  -1   1 171.461 91.9337   6
 -21   1   1 555.082 115.712   2
  21  -1   1 230.700 86.3087   3
 -21   1   1 483.742 124.781   5
  22  -1   1 1071.85 154.338   6
 -22  -1  -1 952.974 180.381   5
  22  -1   1 1150.09 139.576   3
 -22   1   1 1063.74 143.781   2
  22   1  -1 1038.63 156.045   6
  22   1  -1 1008.07 164.477   3
 -22  -1  -1 930.140 96.5062   4
 -22   1   1 1141.85 178.203   5
 -23   1   1 155.998 91.3842   2
  23  -1   1 38.1321 94.1618   6
  23  -1   1 114.387 85.6029   3
 -23   1   1 93.1699 114.786   5
 -23  -1  -1-18.8741 57.2903   4
  23   1  -1 167.189 107.060   6
 -23  -1  -1-11.2146 98.3989   5
 -24  -1  -1 2464.44 158.183   4
  24   1  -1 2404.31 235.939   6
 -24   1   1 2198.82 198.491   2
 -24   1   1 2340.73 241.581   5
  24  -1   1 2070.46 197.944   6
  24  -1   1 2529.65 211.915   3
 -24  -1  -1 2302.70 274.909   5
  25  -1   1 1432.73 179.809   3
 -25   1   1 1813.28 230.387   5
 -25   1   1 1498.50 184.777   2
 -25  -1  -1 1280.12 213.264   5
  25  -1   1 1426.33 178.232   6
 -25  -1  -1 1610.09 142.429   4
  26  -1   1 2320.25 217.617   6
  26  -1   1 2797.54 240.384   3
 -26  -1  -1 2660.31 303.001   5
 -26   1   1 2989.21 286.713   5
 -26  -1  -1 2598.69 171.435   4
 -26   1   1 2398.36 217.432   2
  27   1  -1 651.915 174.950   3
  27  -1   1 628.547 139.913   3
  27  -1   1 651.890 142.290   6
 -27   1   1 469.862 143.887   5
 -27   1   1 413.109 48.9994   4
 -27  -1  -1 701.512 211.707   5
 -27   1   1 472.732 115.512   2
 -27  -1  -1 355.662 92.2807   4
 -27   1   1 303.179 54.2257   4
  28  -1   1 2882.39 251.794   6
 -28   1   1 1917.42 114.665   4
 -28  -1  -1 3198.13 350.060   5
  28   1  -1 3166.24 310.221   3
 -28   1   1 2362.65 106.399   4
  28  -1   1 3128.77 261.822   3
  28   1  -1 2978.76 289.060   6
 -28   1   1 3310.28 270.930   2
 -28   1   1 3691.16 326.483   5
 -28  -1  -1 3027.27 193.287   4
 -29   1   1 472.356 63.1261   4
  29   1  -1 323.360 146.453   6
 -29   1   1 741.852 206.629   5
  29  -1   1 391.508 113.138   6
 -29  -1  -1 396.333 171.267   5
  29   1  -1 772.288 186.200   3
 -29  -1  -1 685.026 124.861   4
 -29   1   1 352.949 67.2252   4
 -29   1   1 429.939 108.512   2
  30   1  -1 328.429 159.559   3
  30  -1   1 343.984 118.675   6
 -30   1   1 306.873 142.219   5
 -30  -1  -1 591.922 134.368   4
  30   1  -1 508.521 174.805   6
 -30   1   1 297.943 105.458   2
 -30  -1  -1 408.955 211.791   5
 -30   1   1 177.628 66.8172   4
 -31   1   1 434.534 86.0427   4
 -31  -1  -1 750.933 141.548   4
  31   1  -1 660.465 195.846   3
 -31  -1  -1 605.752 233.559   5
 -31   1   1 1240.43 267.249   5
 -31   1   1 608.620 154.031   2
  31   1  -1 375.691 167.651   6
  32   1  -1 40.7763 157.048   3
 -32   1   1 66.1524 75.1813   4
 -32   1   1 349.069 191.874   5
 -32  -1  -1 32.5740 126.395   2
 -32   1   1 25.1453 111.056   2
 -32  -1  -1 70.6701 108.978   4
 -32  -1  -1 364.077 200.746   5
  32   1  -1-61.8388 150.952   6
 -33   1   1 40.1221 175.786   5
  33   1  -1 238.065 183.777   3
 -33  -1  -1 29.6403 113.299   4
 -33  -1  -1 145.166 199.828   5
  33  -1   1 97.3003 118.498   3
 -33  -1  -1-227.057 144.829   2
  33   1  -1 125.786 155.128   6
 -33   1   1 0.48034 131.847   2
 -34   1   1 1625.26 237.220   2
  34   1  -1 1610.66 255.400   6
 -34  -1  -1 1593.17 191.270   4
  34   1  -1 1448.78 258.235   3
 -34  -1  -1 1596.27 316.709   5
 -34  -1  -1 1601.86 242.486   2
 -34   1   1 1440.73 281.567   5
  34  -1   1 1481.81 224.614   3
 -35  -1  -1 225.239 243.894   5
  35  -1   1 556.696 190.170   6
 -35   1   1 156.593 166.382   2
 -35  -1  -1 272.348 133.708   4
  35   1  -1 127.209 161.731   6
  35   1  -1 397.839 198.552   3
  35  -1   1 127.882 139.959   3
 -35   1   1 444.625 265.422   5
 -35  -1  -1 474.743 195.091   2
  36  -1   1 332.263 177.460   3
 -36   1   1 152.490 166.840   2
  36   1  -1 114.969 177.549   3
  36  -1   1 169.881 153.313   6
  36   1  -1 149.872 180.880   6
 -36   1   1 40.5003 227.122   5
 -36  -1  -1 87.4354 249.238   5
 -36  -1  -1-105.633 158.772   2
 -37   1   1 344.140 263.643   5
 -37  -1  -1 290.005 281.145   5
  37  -1   1-25.2062 152.874   3
  37  -1   1 96.8224 167.295   6
  37   1  -1 351.206 221.066   3
 -37  -1  -1 325.677 189.522   2
 -37   1   1 160.710 190.307   2
  37   1  -1 396.243 193.639   6
 -38   1   1 1666.33 359.930   5
  38   1  -1 1206.76 253.333   6
  38  -1   1 1542.64 265.059   3
 -38  -1  -1 1711.34 394.173   5
 -38  -1  -1 1550.76 268.962   2
 -38   1   1 1554.33 264.776   2
  38  -1   1 1367.85 244.757   6
  38   1  -1 1590.61 293.804   3
  39   1  -1 1283.42 293.491   3
  39   1  -1 1014.76 239.872   6
  39  -1   1 1003.82 230.136   3
  39  -1   1 706.338 206.093   6
 -39   1   1 1758.44 378.776   5
 -39   1   1 1668.56 276.646   2
 -39  -1  -1 1083.67 244.302   2
 -39  -1  -1 1703.17 403.356   5
 -40  -1  -1 881.355 357.560   5
 -40   1   1 499.825 215.717   2
  40  -1   1 637.966 230.294   6
 -40  -1  -1 940.204 266.207   2
  40   1  -1 505.101 238.296   6
 -40   1   1 601.371 304.585   5
  40   1  -1 531.308 231.533   3
  40  -1   1 481.454 199.548   3
 -41  -1  -1 892.369 379.330   5
  41   1  -1-123.032 189.911   6
  41  -1   1 26.0212 156.005   3
 -41   1   1 48.5949 198.649   2
  41  -1   1 199.219 165.310   6
 -41   1   1 379.438 336.092   5
  41   1  -1 197.267 231.739   3
 -41  -1  -1 88.1106 202.377   2
 -42  -1  -1-153.178 220.233   2
 -42  -1  -1 146.786 297.248   5
 -42   1   1-45.8810 347.351   5
  42   1  -1 173.352 187.508   3
 -42   1   1 284.436 215.401   2
  42   1  -1 59.2466 190.714   6
  42  -1   1 264.570 188.960   3
  42  -1   1-315.022 261.941   6
 -43  -1  -1 373.944 345.180   5
  43  -1   1-197.474 194.205   3
 -43   1   1 307.818 252.226   2
  43   1  -1-411.313 230.047   6
  43   1  -1-187.298 205.155   3
 -43  -1  -1-258.647 269.058   2
 -43   1   1 85.8473 345.038   5
  43  -2  -1 287.985 212.040   6
 -43  -2   1-76.1474 239.033   2
  43   2   1 93.1390 215.208   6
  43  -2  -1-1.31013 208.077   3
  43   2   1 307.717 215.230   3
 -43  -2   1 153.361 319.240   5
 -43   2  -1-129.918 357.912   5
  42  -2  -1 8.78831 174.946   3
 -42   2  -1 371.758 378.475   5
  42  -2  -1 52.7346 191.453   6
  42   2   1-109.453 212.419   6
 -42  -2   1-73.0927 200.062   2
  42   2   1 362.310 233.500   3
 -42  -2   1-70.7808 332.284   5
 -41  -2   1 245.955 213.645   2
 -41   2  -1 133.267 348.156   5
 -41  -2   1-25.5506 299.080   5
  41  -2  -1 6.19705 171.065   3
  41  -2  -1 50.9210 173.460   6
  41   2   1 405.765 228.001   6
  41   2   1 224.018 194.641   3
 -40   2  -1 7381.96 653.028   5
 -40  -2   1 6469.01 506.381   2
  40   2   1 5804.70 460.986   3
  40   2   1 5170.45 456.686   6
 -40  -2   1 7306.57 625.722   5
  40  -2  -1 5509.86 427.294   6
  40  -2  -1 5921.54 478.803   3
  39   2   1 737.383 233.391   3
 -39  -2   1 966.112 264.147   2
  39  -2  -1 543.332 181.986   3
 -39   2  -1 818.557 222.295   2
 -39  -2   1 705.801 295.076   5
  39  -2  -1 971.976 239.807   6
  39   2   1 940.666 250.998   6
 -39   2  -1 1085.84 369.471   5
 -38  -2   1 5037.98 515.781   5
 -38   2  -1 4808.72 354.983   2
 -38  -2   1 5141.51 441.350   2
  38   2   1 4738.06 431.339   6
  38  -2  -1 4991.66 429.611   3
 -38   2  -1 5092.24 525.303   5
  38  -2  -1 4743.48 397.785   6
  38   2   1 4553.14 398.518   3
 -37  -2   1 382.233 202.979   2
  37   2   1 390.832 188.511   3
  37   2   1 256.569 183.361   6
  37  -2  -1 384.129 185.509   6
 -37   2  -1-62.2819 277.356   5
 -37  -2   1 217.470 257.437   5
 -37   2  -1 205.891 143.089   2
  37  -2  -1 88.0644 182.341   3
  36   2   1 4657.05 389.044   3
  36  -2  -1 4729.45 406.254   3
  36  -2  -1 4920.72 385.054   6
 -36   2  -1 5008.54 344.181   2
 -36   2  -1 5709.09 519.694   5
 -36  -2   1 4432.64 388.790   2
 -36  -2   1 5350.06 497.146   5
  36   2   1 4191.58 382.326   6
 -35  -2   1 677.564 246.864   5
  35  -2  -1 539.054 199.110   3
 -35  -2   1 632.439 195.523   4
 -35  -2   1 601.388 188.193   2
  35   2   1 606.685 200.636   6
 -35   2  -1 502.624 160.658   2
 -35   2  -1 327.704 225.500   5
  35   2   1 529.759 187.048   3
  35  -2  -1 678.066 200.977   6
 -34  -2   1 1308.10 203.404   4
 -34  -2   1 1612.16 301.565   5
 -34   2  -1 1351.94 189.983   2
  34   2   1 1153.07 219.761   3
  34   2   1 1350.73 258.007   6
  34  -2  -1 1572.64 269.585   3
  34  -2  -1 1023.57 192.655   6
 -34  -2   1 1198.20 210.800   2
 -34   2  -1 1158.68 302.285   5
  33  -2  -1 57.6057 157.805   3
  33   2   1-6.99128 126.924   3
  33  -2  -1 163.372 141.328   6
 -33  -2   1-53.8826 176.047   5
  33   2   1 294.036 196.370   6
 -33   2  -1 79.1245 199.083   5
 -33   2  -1 203.045 124.766   2
 -33  -2   1 128.428 148.907   4
 -33  -2   1 62.5588 132.536   2
  32  -2  -1 2774.81 304.977   3
 -32  -2   1 2827.23 344.444   5
 -32  -2   1 2975.30 302.367   2
  32   2   1 2638.94 288.019   3
 -32   2  -1 2395.25 135.982   4
 -32  -2   1 3078.72 249.738   4
 -32   2  -1 3000.93 246.507   2
  32   2   1 2398.58 292.791   6
  32  -2  -1 2832.90 276.915   6
 -32   2  -1 3224.10 377.000   5
 -31  -2   1 819.680 165.707   4
  31   2   1 393.062 146.954   3
  31   2   1 279.343 154.834   6
 -31  -2   1 298.668 153.342   5
  31  -2  -1 540.594 174.867   3
 -31   2  -1 393.873 66.7811   4
 -31   2  -1 109.113 186.248   5
 -31  -2   1 520.141 164.936   2
  31  -2  -1 269.796 138.374   6
 -31   2  -1 368.685 114.422   2
  30  -2  -1 1947.17 248.415   3
 -30  -2   1 1959.04 282.736   5
 -30   2  -1 2220.55 313.141   5
 -30  -2   1 2129.46 249.461   2
 -30   2  -1 1521.51 99.1141   4
 -30  -2   1 1710.50 194.676   4
 -30   2  -1 1947.05 195.293   2
  29  -2  -1 1121.88 206.759   3
 -29   2  -1 823.262 202.508   5
 -29  -2   1 985.938 212.282   5
 -29  -2   1 957.397 156.420   4
 -29   2  -1 1115.05 166.557   2
 -29   2  -1 705.762 67.6336   4
 -29  -2   1 1170.82 203.002   2
 -28  -2   1 2658.20 212.618   4
  28  -2  -1 2903.27 283.684   3
 -28  -2   1 2389.49 287.384   5
 -28  -2   1 2882.47 274.393   2
 -28   2  -1 2833.31 305.057   5
 -28   2  -1 2364.25 112.612   4
 -28   2  -1 2767.88 217.909   2
 -27  -2   1 367.609 137.312   2
 -27   2  -1 212.110 127.063   5
 -27   2  -1 410.357 119.836   2
  27  -2  -1 318.142 130.600   3
 -27  -2   1 328.687 106.845   4
 -27   2  -1 272.640 51.0836   4
 -27  -2   1 333.783 151.022   5
 -26   2  -1 128.654 139.204   5
 -26   2  -1 218.494 104.202   2
 -26  -2   1 37.0231 131.951   5
 -26  -2   1 51.7763 90.4672   2
  26   2   1 66.4589 107.560   6
 -26   2  -1 56.6588 32.9761   4
  26  -2  -1 86.0272 84.3062   6
 -26  -2   1 72.2680 94.5256   4
  26   2   1-68.2511 95.4740   3
  25  -2  -1-3.68528 81.6783   6
  25   2   1 49.2140 86.8667   3
 -25  -2   1-86.2453 122.852   5
 -25   2  -1 0.63736 29.9997   4
 -25  -2   1 50.7711 97.7832   2
 -25   2  -1-9.40692 71.0522   2
  25   2   1 58.7786 94.6388   6
 -25   2  -1 125.617 124.549   5
 -25  -2   1 132.117 99.0176   4
 -24   2  -1 14769.7 428.306   2
  24   2   1 14238.7 560.401   6
  24  -2  -1 14364.0 511.515   6
 -24  -2   1 14572.6 605.508   5
 -24   2  -1 15435.5 633.344   5
  24   2   1 15045.2 542.079   3
 -24   2  -1 10734.9 210.999   4
 -24  -2   1 14056.1 419.912   4
 -24  -2   1 14205.6 535.906   2
 -23   2  -1 75.8616 73.7604   2
 -23   2  -1 6.85950 108.480   5
 -23  -2   1 242.667 140.064   5
 -23  -2   1 180.753 97.3963   4
  23   2   1 71.3760 95.4573   6
  23  -2  -1-27.8904 86.9194   6
 -23  -2   1 121.997 96.3697   2
  23  -2  -1-36.1839 85.4780   3
 -23   2  -1-3.62049 33.5465   4
  23   2   1-39.4876 80.9570   3
 -22   2  -1 3369.46 194.977   2
 -22  -2   1 3250.13 277.718   5
  22  -2  -1 3361.42 257.766   3
  22   2   1 3606.39 260.167   3
 -22   2  -1 3402.82 294.042   5
  22  -2  -1 3594.25 253.116   6
  22   2   1 3352.63 272.908   6
 -22  -2   1 3462.47 207.199   4
 -22  -2   1 3475.41 260.539   2
 -21  -2   1 1074.28 167.944   5
  21   2   1 1065.11 141.463   2
  21  -2  -1 1368.01 171.385   3
 -21  -2   1 1160.04 132.208   4
 -21   2  -1 1101.91 176.221   5
 -21  -2   1 1103.18 152.172   2
  21  -2  -1 1061.85 148.587   6
  21   2   1 1080.58 161.623   6
 -21   2  -1 977.665 106.626   2
  21   2   1 1245.04 158.176   3
  20   2   1 5309.96 282.063   2
 -20   2  -1 5285.39 227.847   2
 -20   2  -1 5455.38 335.438   5
 -20  -2   1 5370.65 306.939   2
  20   2   1 5496.75 328.151   6
 -20  -2   1 5301.49 335.302   5
  20  -2  -1 5510.51 291.849   6
  20   2   1 5704.97 306.672   3
  20  -2  -1 5944.97 328.462   3
 -20  -2   1 5523.02 248.455   4
  19  -2  -1 264.727 92.1796   6
 -19  -2   1 100.046 88.0037   5
  19   2   1 122.722 68.1650   2
  19   2   1 66.1995 64.6749   3
 -19   2  -1 111.612 58.6391   2
  19   2   1 156.688 91.0165   6
 -19  -2   1 295.534 90.8868   4
 -19   2  -1 109.910 96.7380   5
 -19  -2   1 20.8968 68.1004   2
  19  -2  -1 188.700 90.3837   3
 -18  -2   1 168.583 78.8092   4
 -18  -2   1-13.1599 86.6196   5
  18   2   1 39.5873 56.5155   2
  18   2   1 99.3939 77.9174   3
  18  -2  -1 153.043 77.1862   3
  18   2   1 128.092 87.6390   6
 -18   2  -1 104.522 54.8545   2
 -18   2  -1 21.6274 90.9870   5
  18  -2  -1 83.4500 60.9714   6
  17  -2  -1 2347.73 184.546   6
  17  -2  -1 2416.85 200.265   3
 -17   2  -1 2501.28 145.858   2
 -17   2  -1 2604.87 218.766   5
 -17  -2   1 2648.65 228.192   5
  17   2   1 2245.83 183.519   3
  17   2   1 2389.61 216.513   6
 -17  -2   1 2380.86 164.052   4
  17   2   1 2373.63 190.369   2
  16   2   1 1282.56 137.791   3
 -16   2  -1 1367.47 105.028   2
  16   2   1 1334.55 143.883   2
  16  -2  -1 1424.14 144.865   6
 -16  -2   1 1188.12 119.289   4
 -16   2  -1 1199.96 123.924   2
 -16   2  -1 1403.22 162.752   5
  16  -2  -1 1279.26 144.351   3
 -16  -2   1 1295.45 161.979   5
  16   2   1 1320.79 159.312   6
 -15   2  -1 279.421 72.4675   2
  15  -2  -1 288.763 86.6471   3
  15   2   1 244.516 80.9786   3
 -15  -2   1 291.103 100.980   5
  15   2   1 152.025 30.1853   4
  15  -2  -1 165.629 63.8438   6
 -15   2  -1 290.167 60.1821   2
 -15   2  -1 42.2534 98.7959   6
 -15  -2   1 438.378 86.2858   4
 -15   2  -1 271.752 84.8302   5
  15   2   1 336.089 80.9804   2
  15   2   1 275.889 94.3161   6
  14   2   1 9475.14 327.188   3
 -14  -2   1 8930.09 291.123   4
 -14   2  -1 9103.77 356.852   5
 -14   2  -1 9302.41 233.089   2
  14   2   1 9084.91 191.052   4
  14  -2  -1 9253.29 312.515   6
  14  -2  -1 9903.18 361.893   3
 -14   2  -1 8927.06 290.718   6
 -14   2  -1 9895.38 274.721   2
  14   2   1 9307.69 322.490   2
 -14  -2   1 8670.67 358.466   5
  14   2   1 10042.3 390.854   6
  13   2   1-11.6327 63.8246   6
  13   2   1 18.1998 53.1010   2
  13   2   1 28.8286 50.5629   3
  13  -2  -1-8.55699 50.6585   6
  13   2   1 38.1882 33.3796   4
 -13  -2   1 27.5390 57.0849   4
  13  -2  -1-52.7151 70.5122   5
  13  -2  -1 62.2331 51.8425   3
 -13  -2   1 19.9422 67.2512   5
 -13   2  -1 0.24763 61.1454   6
 -13   2  -1 75.2378 42.6144   2
 -13   2  -1-58.5848 54.9809   2
 -13   2  -1-171.066 86.1385   3
  12  -2  -1 9440.11 330.560   3
  12  -2  -1 9066.75 297.230   5
 -12   2  -1 9363.29 261.511   6
 -12   2  -1 8973.49 267.982   3
  12  -2  -1 9394.65 301.590   6
 -12  -2   1 10689.2 321.553   4
  12   2   1 9492.04 348.654   6
  12   2   1 9071.43 300.401   2
  12   2   1 9458.10 309.760   3
  12   2   1 8900.76 210.966   4
 -12  -2   1 9595.72 354.583   5
 -12   2  -1 10259.7 244.270   2
 -12   2  -1 8977.31 200.893   2
 -11  -2   1 314.793 77.1144   4
 -11  -2   1 228.254 78.4723   5
  11   2   1 204.455 61.0671   2
  11  -2  -1 332.097 81.3381   3
 -11   2  -1 164.812 47.1483   2
  11  -2  -1 328.589 71.1259   5
  11   2   1 298.422 53.7791   4
 -11   2  -1 196.318 52.6073   3
 -11   2  -1 135.479 51.6454   6
  11  -2  -1 326.118 71.2490   6
  11   2   1 277.444 83.4845   6
 -11   2  -1 260.474 44.5203   2
  11   2   1 281.604 68.0436   3
  10   2   1 5530.26 217.412   3
 -10  -2   1 5126.24 243.064   5
 -10   2  -1 5491.94 147.285   2
  10  -2  -1 5388.90 235.055   3
 -10  -2   1 5945.03 237.562   4
 -10   2  -1 5206.69 165.351   6
  10  -2  -1 5367.92 195.275   5
  10   2   1 5752.19 226.157   2
  10   2   1 5341.94 243.549   6
 -10   2  -1 4862.08 123.531   2
 -10   2  -1 3642.07 181.483   5
 -10   2  -1 5093.59 171.125   3
  10   2   1 5352.75 176.749   4
  10  -2  -1 5608.84 217.223   6
   9   2   1 1901.09 126.462   3
   9   2   1 2097.50 137.961   2
   9  -2  -1 1962.22 116.205   5
  -9   2  -1 2034.75 96.9673   6
  -9   2  -1 2025.34 104.451   3
  -9   2  -1 1880.09 125.927   5
  -9  -2   1 2168.24 159.661   5
   9  -2  -1 1982.96 144.039   3
   9   2   1 1998.79 151.342   6
   9   2   1 1942.03 116.230   4
  -9  -2   1 2275.47 146.180   4
   9  -2  -1 2002.55 131.005   6
   8   2   1 21568.6 394.902   3
  -8  -2   1 22547.2 416.349   4
   8   2   1 20977.4 436.488   6
   8  -2  -1 21463.4 328.553   5
   8   2   1 21016.4 389.238   2
  -8  -2   1 20390.0 439.992   5
  -8   2  -1 20836.5 284.898   3
   8  -2  -1 21436.6 387.387   6
   8   2   1 20903.3 366.249   4
  -8   2  -1 20285.7 361.263   5
   8  -2  -1 21589.0 431.689   3
  -7  -2   1 58.5437 53.0444   4
  -7   2  -1 51.3577 29.5815   3
   7   2   1 23.6576 38.3458   2
   7  -2  -1 76.0647 48.4345   3
   7   2   1 86.6446 55.6997   4
   7   2   1 36.4321 55.8939   6
   7  -2  -1 41.7107 36.9604   5
   7  -2  -1 26.8533 41.0772   6
  -7   2  -1 1.37473 43.8993   5
   7  -2  -1 92.8301 51.6554   2
  -7  -2   1-9.73565 46.5808   5
   6  -2  -1 7067.52 156.429   5
  -6  -2   1 4174.17 220.825   6
   6  -2  -1 6591.42 205.295   2
  -6  -2   1 6445.89 238.039   3
  -6  -2   1 6229.85 221.841   5
   6  -2  -1 6764.43 222.219   3
  -6   2  -1 6774.55 191.670   5
   6   2   1 6887.34 230.907   6
   6   2   1 7115.99 211.058   2
   6  -2  -1 7255.01 211.360   6
   6   2   1 6666.34 212.571   4
   5  -2  -1 1018.54 75.9856   4
  -5  -2   1 971.192 90.1290   5
   5   2   1 1073.31 93.5418   6
  -5  -2   1 1030.47 108.185   6
   5   2   1 1089.51 93.2305   4
   5  -2  -1 959.400 79.0022   2
  -5   2  -1 1036.14 75.5847   5
  -5  -2   1 1053.33 98.0692   3
   5   2   1 1100.94 83.2164   2
   5  -2  -1 1057.83 58.5770   5
   5  -2  -1 1117.91 89.7882   3
   5  -2  -1 1064.17 80.6184   6
   4  -2  -1 355.561 52.9391   3
  -4  -2   1 394.761 72.7542   6
  -4  -2   1 349.773 55.9526   5
   4  -2  -1 363.290 50.1331   2
   4   2   1 283.185 44.4462   2
   4   2   1 383.925 62.7223   4
   4  -2  -1 441.485 37.0438   5
   4  -2  -1 297.363 52.5796   4
   4   2   1 330.468 51.3273   6
  -4  -2   1 309.868 57.9010   3
  -4   2  -1 366.693 46.4825   5
   4  -2  -1 384.814 51.1056   6
  -3  -2   1-29.1310 40.1827   6
  -3   2  -1-3.55716 24.5838   5
   3   2   1-7.13718 39.3833   4
   3  -2  -1-6.78713 17.8124   5
   3   2   1 36.1008 29.5982   2
   3  -2  -1 23.6569 27.7094   2
   3   2   1 34.5878 29.2715   6
   3  -2  -1-22.9493 37.8289   4
   3  -2  -1 9.49017 24.0820   3
  -3  -2   1 14.7229 31.1877   3
  -3  -2   1 7.42535 30.6149   5
   2   2   1 2393.29 113.344   6
  -2  -2   1 2907.47 126.195   3
   2   2   1 3048.22 135.130   5
   2  -2  -1 2416.17 106.808   3
   2  -2  -1 3063.21 93.5349   5
   2  -2  -1 3142.45 120.380   2
  -2   2  -1 2674.40 103.828   5
   2  -2  -1 3146.52 140.556   4
  -2  -2   1 2023.60 104.572   5
  -2  -2   1 2842.73 132.612   6
   2   2   1 2922.37 143.413   4
   2   2   1 3070.52 114.968   2
  -1  -2   1 808.986 68.0944   6
   1   2   1 901.728 84.9348   4
  -1  -2   1 877.378 65.2858   3
   1   2   1 793.139 66.3482   5
   1   2   1 872.536 72.7528   6
   1  -2  -1 796.198 61.8813   2
  -1   2  -1 724.656 59.0340   5
   1  -2  -1 820.966 54.8540   5
  -1   2  -1 689.552 46.4560   6
   1  -2  -1 840.142 63.1304   3
  -1  -2   1 838.445 66.5125   5
   1  -2  -1 954.194 82.4593   4
   1   2   1 800.584 60.9958   2
   0   2  -1 22.4194 18.2297   3
   0  -2   1-4.21760 23.6388   6
   0  -2   1-17.5162 29.0761   5
   0  -2  -1 10.9185 24.9022   2
   0  -2  -1 20.7716 26.9221   6
   0   2  -1 25.3766 25.4139   6
   0  -2   1 12.6799 23.2588   3
   0   2   1 15.7936 23.3857   2
   0  -2  -1 22.0924 27.5997   5
   0  -2  -1-18.4391 35.9504   4
   0   2  -1-1.33781 24.8816   5
   0   2   1-15.6940 26.0098   6
   0   2   1 14.3033 33.3456   4
   0   2   1 9.46340 23.0786   5
   1   2  -1 713.467 65.1429   5
  -1  -2  -1 877.447 81.2948   4
   1   2  -1 765.670 59.5376   3
  -1  -2  -1 882.524 70.3083   5
   1  -2   1 785.569 51.6941   6
  -1   2   1 800.319 67.4567   6
  -1   2   1 821.500 56.2555   5
  -1   2   1 850.922 78.3527   4
  -1   2   1 744.321 58.4255   2
  -1  -2  -1 819.025 60.8820   2
   1  -2   1 745.599 57.4121   5
   1   2  -1 776.633 63.5753   6
  -1   2   1 763.528 62.0051   3
  -1  -2  -1 824.371 68.6950   6
  -2   2   1 3024.31 135.629   4
  -2  -2  -1 3033.09 115.384   2
  -2   2   1 3086.29 122.964   3
  -2  -2  -1 3108.57 137.653   5
   2   2  -1 2704.58 125.585   5
   2  -2   1 2851.96 105.754   5
  -2   2   1 3131.37 95.2345   5
  -2   2   1 2457.78 104.188   2
  -2  -2  -1 2939.19 143.236   4
   2   2  -1 2676.30 122.326   6
   2   2  -1 2710.00 117.337   3
  -2  -2  -1 2909.58 128.866   6
  -3  -2  -1-11.7895 37.3477   4
  -3  -2  -1-21.7378 28.5122   2
  -3   2   1-13.2916 26.3548   3
  -3   2   1 9.27255 26.6948   6
  -3   2   1-23.5490 18.8796   5
  -3   2   1-53.9890 39.0140   4
  -3   2   1-17.2235 25.9658   2
   3  -2   1 6.39767 23.7860   5
   3   2  -1 0.30232 32.4850   5
  -3  -2  -1-4.81504 39.1348   5
   3   2  -1 20.2066 32.1492   3
   3   2  -1-0.97503 34.0976   6
  -3  -2  -1-11.5891 36.0462   6
  -4  -2  -1 366.011 49.7454   2
   4   2  -1 315.979 61.3862   5
  -4  -2  -1 295.840 61.3958   5
  -4   2   1 495.319 38.6845   5
  -4  -2  -1 293.122 58.1077   4
  -4   2   1 321.496 53.8634   4
   4   2  -1 398.519 64.8919   6
   4   2  -1 340.238 55.7812   3
   4   2  -1 405.735 56.0329   4
  -4  -2  -1 359.498 63.1814   6
  -4   2   1 341.526 54.7752   3
   4  -2   1 391.226 49.0712   5
  -4   2   1 453.603 54.7247   2
  -4   2   1 362.074 47.2653   6
   5   2  -1 1011.86 88.8814   3
   5  -2   1 1022.40 74.8172   5
   5   2  -1 1110.04 104.999   6
  -5  -2  -1 971.940 79.4455   2
   5   2  -1 1137.08 83.3648   4
   5   2  -1 983.429 98.0771   5
  -5  -2  -1 1003.00 96.6111   6
  -5   2   1 1027.96 82.6062   4
  -5   2   1 1112.57 80.2939   2
   5   2  -1 1198.86 102.120   4
  -5  -2  -1 1160.32 97.1124   4
  -5   2   1 1127.69 86.6513   6
  -5   2   1 1024.15 90.9530   3
  -5   2   1 1209.90 58.5055   5
  -6   2   1 6830.55 199.212   2
  -6  -2  -1 6376.84 203.197   2
  -6  -2  -1 7083.55 269.447   5
  -6   2   1 5185.24 201.171   3
   6   2  -1 6378.57 224.120   3
  -6   2   1 6136.72 180.010   4
   6   2  -1 6984.77 260.342   5
   6   2  -1 7460.56 241.800   4
  -6   2   1 6799.43 208.992   6
   6  -2   1 6835.53 193.758   5
  -6   2   1 7089.72 142.198   5
  -6  -2  -1 6952.29 226.295   4
   6   2  -1 7158.08 195.149   4
   6   2  -1 6970.09 253.859   6
  -6  -2  -1 6419.18 231.044   6
   7   2  -1 32.2106 40.9073   4
  -7   2   1 7.86473 49.3668   6
  -7  -2  -1 45.7500 46.0067   2
  -7   2   1 117.292 48.3901   4
   7   2  -1 49.8920 59.5933   4
  -7  -2  -1-25.7123 62.5081   6
  -7   2   1 36.5744 43.4466   2
   7  -2   1 13.3016 24.6926   3
   7   2  -1 36.6706 45.7986   3
   7   2  -1-16.4034 56.0348   6
  -7  -2  -1-13.7782 50.9930   4
  -7   2   1-15.8046 32.1889   5
   7  -2   1 31.8169 43.2977   5
  -7  -2  -1 17.9112 55.5145   5
   8   2  -1 16739.1 286.564   4
  -8   2   1 20974.7 290.695   5
   8   2  -1 23522.5 429.476   4
  -8  -2  -1 20751.3 393.026   4
   8  -2   1 21493.7 275.647   3
  -8  -2  -1 21392.8 503.218   5
   8  -2   1 20730.4 374.100   5
   8   2  -1 21834.6 485.092   6
   8   2  -1 21077.1 451.297   3
  -8   2   1 21088.7 378.136   2
  -8  -2  -1 21013.3 406.399   2
   9  -2   1 2019.29 98.9901   6
  -9  -2  -1 1910.20 167.241   5
   9  -2   1 2075.68 133.285   5
  -9   2   1 1979.13 124.927   2
   9   2  -1 2252.50 108.061   4
  -9  -2  -1 1871.04 132.638   2
   9   2  -1 2202.21 161.135   3
   9  -2   1 2062.93 99.5849   3
   9   2  -1 2028.75 159.637   6
  -9   2   1 1814.28 98.6012   5
  -9  -2  -1 2136.51 133.868   4
   9   2  -1 2291.15 140.755   4
 -10  -2  -1 5553.59 281.886   5
  10  -2   1 5203.38 165.521   3
  10   2  -1 5257.98 258.678   6
  10  -2   1 5131.49 210.285   5
 -10   2   1 5313.90 174.565   5
  10   2  -1 5801.12 216.448   4
  10  -2   1 5022.69 162.815   6
 -10  -2  -1 5472.10 207.575   4
  10   2  -1 5492.11 159.282   4
 -10   2   1 5415.80 211.020   2
  10   2  -1 5194.61 251.679   3
  11   2  -1 305.475 68.1381   4
 -11  -2  -1 256.895 90.6167   5
  11  -2   1 172.443 47.1268   3
  11   2  -1 108.737 63.7093   3
 -11   2   1 340.864 67.2700   2
  11   2  -1 196.373 41.4564   4
  11   2  -1 166.014 82.4078   6
  11  -2   1 164.682 54.5824   6
 -11  -2  -1 261.896 65.8507   4
 -11   2   1 426.354 72.0178   5
  12   2  -1 9311.63 363.407   6
  12   2  -1 9907.77 245.146   4
  12  -2   1 9602.15 253.983   3
 -12   2   1 9525.72 295.800   2
  12   2  -1 9318.67 189.106   4
 -12  -2  -1 9425.69 277.629   4
  12   2  -1 9323.48 351.024   3
 -12  -2  -1 9189.62 380.027   5
 -12   2   1 9428.50 271.405   5
  12  -2   1 9630.70 258.297   6
  13  -2   1 65.6143 45.4514   3
  13  -2   1-18.0439 60.8519   6
  13   2  -1-4.96395 67.8367   6
 -13  -2  -1 87.9126 49.9486   4
 -13  -2  -1 12.3057 80.2819   5
  13   2  -1-9.93421 23.5555   4
  13   2  -1 71.3500 42.9506   4
 -13   2   1 5.45698 46.2512   2
  13   2  -1 40.0987 59.8722   3
 -13   2   1-22.8269 56.3358   5
  14  -2   1 9741.16 283.600   3
  14   2  -1 9216.42 378.492   6
 -14   2   1 9738.18 308.520   5
 -14  -2  -1 9236.44 409.088   5
 -14  -2  -1 10068.9 292.823   4
 -14   2   1 9450.58 313.211   2
  14   2  -1 9484.74 375.326   3
  14  -2   1 9399.11 284.201   6
  15   2  -1 362.454 93.0019   6
 -15  -2  -1 249.455 92.3658   5
  15   2  -1 328.492 94.8223   3
 -15   2   1 269.473 79.0682   5
  15  -2   1 428.665 83.5514   6
 -15  -2  -1 342.409 79.1402   4
  15  -2   1 286.231 66.3074   3
 -15   2   1 312.557 78.4687   2
 -16  -2  -1 1338.09 116.839   4
 -16   2   1 1300.74 130.635   2
 -16   2   1 1383.10 138.877   5
  16   2  -1 1462.32 167.242   3
 -16  -2  -1 1491.98 187.343   5
  16  -2   1 1328.46 123.537   3
  16  -2   1 1382.43 125.848   6
  16   2  -1 1347.44 167.297   6
  17  -2   1 2491.63 171.938   6
  17   2  -1 2528.64 219.504   3
 -17  -2  -1 2264.14 152.729   4
  17  -2   1 2588.72 170.872   3
 -17  -2  -1 2397.59 244.137   5
 -17   2   1 2400.62 180.456   2
 -17   2   1 2595.33 194.469   5
  17   2  -1 2586.77 224.520   6
 -18  -2  -1-13.3780 100.121   5
 -18  -2  -1 108.910 58.3595   4
  18   2  -1 64.7948 67.4929   3
 -18   2   1 139.466 70.2788   2
  18  -2   1 94.7627 60.6918   3
  18  -2   1 51.6631 59.6388   6
  18   2  -1 19.6718 77.5865   6
 -18   2   1 192.534 96.1620   5
 -19   2   1 149.700 94.9848   5
  19  -2   1-35.6809 66.9571   6
 -19  -2  -1 221.431 83.1527   4
 -19   2   1 114.177 60.6353   2
  19  -2   1 192.480 77.6776   3
  19   2  -1 123.065 95.2613   6
  19   2  -1 98.4406 87.5943   3
 -19  -2  -1 149.117 111.379   5
 -20  -2  -1 5650.97 243.995   4
  20  -2   1 6011.72 281.942   3
  20   2  -1 5464.60 329.870   3
 -20  -2  -1 5833.66 393.062   5
  20   2  -1 5465.50 337.126   6
  20  -2   1 5267.55 264.886   6
 -20   2   1 5806.67 289.956   2
 -20   2   1 6055.22 319.645   5
  21  -2   1 1058.18 137.201   6
  21  -2   1 1222.84 140.197   3
 -21   2   1 1415.30 177.536   5
  21   2  -1 1154.05 170.481   3
 -21  -2  -1 1301.05 211.362   5
 -21   2   1 1162.11 142.998   2
  21   2  -1 1294.19 185.301   6
 -21  -2  -1 1397.44 138.193   4
 -22  -2  -1 3587.61 206.319   4
 -22   2   1 3798.04 274.522   5
  22   2  -1 3289.40 273.255   6
 -22  -2  -1 3728.39 330.023   5
 -22   2   1 3555.11 239.870   2
  22  -2   1 3671.32 236.802   3
  22  -2   1 3374.33 226.802   6
 -23   2   1-124.226 124.798   5
 -23  -2  -1 81.4448 86.3210   4
  23   2  -1-35.7901 112.953   6
  23  -2   1 105.377 83.4170   3
 -23   2   1 77.8120 89.8402   2
 -23  -2  -1 161.957 123.514   5
  23  -2   1 241.893 102.605   6
 -24   2   1 14890.8 506.314   2
  24  -2   1 15215.8 496.848   3
  24  -2   1 14300.6 481.819   6
 -24  -2  -1 15379.0 431.821   4
 -24   2   1 16349.6 577.687   5
 -24  -2  -1 14566.5 646.577   5
 -25  -2  -1 276.121 140.771   5
  25  -2   1 94.9380 76.1581   3
  25  -2   1 11.2743 78.3399   6
 -25  -2  -1 137.322 94.7882   4
 -25   2   1 110.549 89.7728   2
 -25   2   1 202.158 130.625   5
  26  -2   1 73.1544 91.0294   6
 -26  -2  -1-68.3689 162.268   5
 -26  -2  -1-18.2250 86.6056   4
  26  -2   1 48.0854 72.7149   3
  26   2  -1 42.0289 132.220   3
 -26   2   1 155.079 95.0078   2
 -26   2   1 165.289 119.964   5
  27  -2   1 362.447 118.922   6
 -27   2   1 548.228 131.013   2
 -27  -2  -1 187.673 167.438   5
  27  -2   1 304.090 99.7617   3
  27   2  -1 352.321 160.927   6
 -27   2   1 718.936 187.356   5
  27   2  -1 416.604 154.130   3
 -27  -2  -1 324.821 98.9715   4
 -28   2   1 2855.26 252.069   2
  28  -2   1 2666.78 233.087   6
 -28  -2  -1 2646.19 202.010   4
 -28  -2  -1 2760.54 335.991   5
  28  -2   1 2882.98 241.071   3
 -28   2   1 2988.69 296.762   5
  28   2  -1 2833.53 293.449   3
  28   2  -1 2522.57 272.952   6
 -29   2   1 1205.49 193.086   2
 -29   2   1 1170.01 223.936   5
  29  -2   1 817.424 143.194   6
  29   2  -1 965.223 208.659   3
 -29  -2  -1 886.522 140.380   4
 -29  -2  -1 1204.55 260.163   5
  29   2  -1 889.554 216.646   6
  30  -2   1 1542.46 191.842   6
  30   2  -1 1868.88 259.310   3
 -30   2   1 1662.67 200.558   2
 -30   2   1 2180.20 270.845   5
  30   2  -1 1985.94 256.641   6
 -30  -2  -1 1472.03 256.220   5
 -30  -2  -1 1691.90 180.435   4
  31   2  -1 568.838 191.787   6
 -31   2   1 408.935 143.338   2
 -31   2   1 189.626 170.251   5
 -31  -2  -1 565.886 142.381   4
 -31  -2  -1 345.975 208.072   5
  31  -2   1 327.383 117.185   6
  31   2  -1 410.155 156.508   3
  32   2  -1 2877.65 314.899   6
  32   2  -1 3017.66 327.172   3
 -32   2   1 2948.65 280.918   2
 -32  -2  -1 2698.92 236.399   4
 -32   2   1 2975.58 328.569   5
 -32  -2  -1 2641.30 352.928   5
  32  -2   1 2595.65 259.828   6
  33   2  -1 172.039 176.885   3
 -33  -2  -1 196.676 129.571   4
 -33   2   1 223.494 205.997   5
 -33   2   1 263.168 141.589   2
  33  -2   1 109.611 115.111   3
  33   2  -1 279.922 185.078   6
 -33  -2  -1 169.557 208.413   5
 -34   2   1 1419.95 267.654   5
  34   2  -1 1038.82 235.289   6
 -34   2   1 1172.75 204.850   2
  34   2  -1 1546.91 277.233   3
 -34  -2  -1 1170.25 203.096   4
 -34  -2  -1 1301.14 320.208   5
  34  -2   1 1258.24 196.193   3
 -35  -2  -1 782.653 236.817   2
 -35   2   1 476.952 180.939   2
  35   2  -1 545.883 208.238   6
 -35   2   1 1012.69 285.611   5
 -35  -2  -1 334.820 149.271   4
 -35  -2  -1 463.378 230.756   5
  35  -2   1 370.969 146.362   3
  35   2  -1 486.404 183.806   3
 -36   2   1 5633.87 492.592   5
 -36  -2  -1 4649.83 381.284   2
  36   2  -1 4917.23 436.218   3
 -36   2   1 4946.96 377.440   2
  36   2  -1 4126.46 387.099   6
 -36  -2  -1 4519.33 336.327   4
  36  -2   1 4550.43 361.697   3
  36  -2   1 4365.13 350.566   6
 -36  -2  -1 4971.52 517.418   5
 -37  -2  -1 493.603 274.457   5
  37  -2   1 22.0637 141.674   3
 -37   2   1 693.137 311.465   5
 -37  -2  -1 522.808 197.582   2
  37  -2   1 221.873 152.604   6
  37   2  -1 66.2407 195.290   3
 -37   2   1 480.273 193.842   2
  37   2  -1 9.50601 161.351   6
 -38   2   1 5381.33 412.767   2
 -38  -2  -1 5366.02 566.478   5
 -38   2   1 5586.35 527.444   5
  38  -2   1 4479.85 374.787   3
  38   2  -1 5559.35 498.521   3
  38  -2   1 4508.42 377.559   6
 -38  -2  -1 5350.04 432.668   2
  38   2  -1 4227.86 399.323   6
 -39  -2  -1 782.957 258.785   2
 -39   2   1 911.531 251.325   2
  39  -2   1 1086.09 238.974   6
 -39   2   1 1053.12 338.492   5
  39   2  -1 677.691 238.517   6
  39  -2   1 687.838 195.260   3
 -39  -2  -1 947.780 338.922   5
  39   2  -1 572.566 218.732   3
 -40   2   1 6517.65 587.325   5
  40  -2   1 5471.16 418.373   3
  40   2  -1 6068.59 493.059   6
 -40  -2  -1 7344.17 684.427   5
 -40   2   1 6492.85 466.907   2
  40  -2   1 4600.62 389.217   6
  40   2  -1 6706.31 541.830   3
 -40  -2  -1 6123.10 472.374   2
 -41   2   1 1.45708 192.123   2
 -41  -2  -1 130.991 282.917   5
  41  -2   1 93.1075 180.493   3
 -41  -2  -1 112.554 212.423   2
  41   2  -1 148.204 204.504   6
 -41   2   1 987.846 396.744   5
  41   2  -1 180.661 220.996   3
 -42  -2  -1-298.977 244.856   2
 -42  -2  -1-27.1623 312.968   5
  42   2  -1-9.62154 194.400   3
 -42   2   1 232.226 337.051   5
 -42   2   1-32.4400 201.043   2
  42   2  -1 206.379 222.221   6
  42  -2   1 62.2214 172.463   3
  43   2  -1-132.757 203.584   3
  43   2  -1 474.346 227.731   6
  43  -2   1 558.276 214.202   3
 -43  -2  -1 442.178 361.552   5
 -43   2   1 173.438 221.164   2
 -43  -2  -1 321.237 256.914   2
  43   3   1 222.160 221.759   6
 -43   3  -1-258.588 391.065   5
 -43  -3   1 21.9929 320.987   5
  43   3   1 392.149 224.771   3
 -43  -3   1 487.454 270.972   2
  43  -3  -1-27.4085 197.312   6
  43  -3  -1 517.202 240.421   3
  42   3   1 187.079 195.755   3
 -42  -3   1 307.650 241.456   2
  42  -3  -1 493.303 199.284   6
  42   3   1-62.3589 209.402   6
 -42  -3   1 289.575 294.092   5
  42  -3  -1 307.831 208.100   3
 -42   3  -1 453.939 376.318   5
  41   3   1-179.693 170.788   3
  41  -3  -1 246.210 192.075   6
  41   3   1 144.109 243.364   6
  41  -3  -1 220.392 203.352   3
 -41  -3   1 439.859 227.613   2
 -41   3  -1-204.026 347.633   5
 -41  -3   1-489.449 341.189   5
  40  -3  -1 137.824 175.139   3
 -40  -3   1-41.2223 218.330   2
  40   3   1 137.477 212.440   6
 -40   3  -1 597.911 361.805   5
  40   3   1-9.17551 158.291   3
 -40  -3   1 326.958 296.000   5
  40  -3  -1 36.7327 179.171   6
 -39   3  -1 434.771 325.640   5
 -39  -3   1 8.32386 198.917   2
  39   3   1 346.194 230.524   6
  39   3   1 181.386 167.739   3
  39  -3  -1 184.758 181.649   6
  39  -3  -1-1.27027 180.937   3
 -39  -3   1 175.665 286.076   5
 -38  -3   1 6013.27 550.575   5
  38   3   1 5821.19 458.359   3
 -38   3  -1 5701.54 360.421   2
  38  -3  -1 5423.11 408.253   6
  38   3   1 5281.52 466.539   6
 -38   3  -1 6375.37 581.047   5
  38  -3  -1 5604.29 449.201   3
 -38  -3   1 6104.43 468.947   2
 -37   3  -1 569.823 185.225   2
 -37   3  -1 116.038 280.493   5
  37  -3  -1 227.591 169.264   3
 -37  -3   1 358.804 206.221   2
 -37  -3   1 186.132 247.187   5
  37   3   1 174.620 170.479   3
  37  -3  -1 89.7887 146.191   6
  37   3   1 479.411 213.526   6
 -36  -3   1 2163.45 299.495   2
 -36   3  -1 1821.67 219.430   2
  36   3   1 2006.08 279.374   3
  36   3   1 1758.58 288.574   6
 -36   3  -1 2478.35 388.782   5
 -36  -3   1 1957.45 345.199   5
 -36  -3   1 2178.84 289.910   4
  36  -3  -1 2015.60 278.330   3
  36  -3  -1 2152.08 274.182   6
 -35  -3   1 720.028 258.083   5
 -35  -3   1 504.532 193.319   4
  35  -3  -1 711.712 211.416   3
  35   3   1 807.188 238.349   6
  35   3   1 625.429 185.341   3
 -35  -3   1 342.470 152.129   2
  35  -3  -1 547.660 164.067   6
 -35   3  -1 479.508 238.842   5
 -35   3  -1 273.710 134.146   2
 -34   3  -1 1591.32 305.507   5
 -34   3  -1 1092.39 174.590   2
 -34  -3   1 1579.86 246.122   4
 -34  -3   1 1114.64 223.741   2
  34   3   1 943.979 227.388   6
  34  -3  -1 1169.46 208.244   6
  34   3   1 808.922 187.939   3
  34  -3  -1 1115.90 230.653   3
 -34  -3   1 1479.90 296.401   5
  33  -3  -1-87.9004 115.423   6
 -33   3  -1-330.025 234.608   5
  33   3   1 204.780 173.475   6
 -33   3  -1 123.255 118.744   2
 -33  -3   1-79.6535 188.050   5
 -33  -3   1 41.0361 151.926   4
  33  -3  -1 21.8246 136.205   3
  33   3   1-36.8772 149.869   3
 -33  -3   1 157.707 151.250   2
  32   3   1 1224.73 231.407   3
  32  -3  -1 858.961 199.501   3
 -32   3  -1 391.192 59.1358   4
 -32  -3   1 1010.59 253.783   5
  32  -3  -1 1004.26 188.146   6
 -32  -3   1 873.126 207.951   2
 -32  -3   1 1265.11 214.381   4
 -32   3  -1 852.128 225.540   5
  32   3   1 936.082 233.732   6
 -32   3  -1 788.449 148.980   2
  31   3   1 154.079 157.683   6
 -31   3  -1-3.85762 39.5206   4
  31   3   1-31.4319 128.249   3
 -31  -3   1 73.2239 184.684   5
 -31  -3   1 194.528 141.078   2
 -31   3  -1 39.2869 93.8952   2
 -31   3  -1 76.0890 179.600   5
 -31  -3   1 231.583 156.896   4
  31  -3  -1 74.9490 139.545   3
 -30   3  -1 317.844 54.6231   4
  30   3   1 370.611 151.930   3
 -30   3  -1 520.266 127.542   2
 -30  -3   1 802.562 212.090   2
  30   3   1 636.102 200.705   6
 -30   3  -1 421.177 169.984   5
 -30  -3   1 395.830 148.674   4
  30  -3  -1 471.258 157.711   3
 -30  -3   1 588.893 190.060   5
 -29  -3   1 526.622 151.269   4
 -29   3  -1 136.934 154.015   5
 -29  -3   1 442.030 166.432   2
 -29   3  -1 307.997 50.4069   4
 -29   3  -1 526.824 116.681   2
 -29  -3   1 607.470 195.873   5
  29  -3  -1 529.026 158.897   3
  29   3   1 346.768 162.245   6
 -28   3  -1 267.424 156.374   5
 -28  -3   1 65.8627 106.988   4
 -28  -3   1 47.0390 111.469   2
  28  -3  -1 55.0340 117.555   3
 -28  -3   1-90.3749 146.645   5
 -28   3  -1 41.6073 85.5355   2
 -27  -3   1-16.0166 106.431   4
 -27   3  -1 64.2118 93.3429   2
  27  -3  -1 162.435 108.424   3
 -27   3  -1 36.5245 120.132   5
 -27  -3   1 80.7790 149.813   5
  27  -3  -1-49.6260 101.089   6
 -27  -3   1-73.9343 99.1830   2
 -26  -3   1 86.5909 125.510   5
  26  -3  -1 67.1596 81.7606   6
 -26   3  -1 160.963 79.2402   2
 -26  -3   1 254.283 127.213   2
 -26   3  -1 162.128 139.849   5
 -26  -3   1 442.031 133.246   4
  25  -3  -1 237.269 87.8368   6
 -25  -3   1 433.563 154.736   5
  25   3   1 404.411 113.729   3
 -25   3  -1 327.383 92.0749   2
 -25  -3   1 255.479 122.377   2
 -25   3  -1 297.080 145.439   5
 -25  -3   1 129.341 92.8393   4
 -24   3  -1 3770.47 307.403   5
  24  -3  -1 3804.45 254.952   6
  24   3   1 3947.93 289.772   3
 -24  -3   1 3456.87 307.177   5
  24   3   1 3809.83 268.497   2
 -24  -3   1 3740.37 246.101   4
 -24   3  -1 3745.02 209.333   2
  24   3   1 3772.57 309.142   6
 -23  -3   1 87.8018 89.7153   5
 -23   3  -1 243.979 126.499   5
 -23  -3   1 225.771 100.405   4
  23   3   1 257.704 104.970   3
  23   3   1 191.927 109.553   6
 -23   3  -1 292.371 76.6431   2
  23  -3  -1 205.996 89.3268   6
  23   3   1 252.076 103.072   2
 -22   3  -1 247.271 132.249   5
  22  -3  -1 116.996 91.2322   3
  22   3   1 127.632 89.0077   6
  22  -3  -1 37.3690 66.6323   6
 -22  -3   1 134.348 104.332   5
 -22  -3   1 236.658 94.5591   4
  22   3   1 40.8780 72.0583   3
  22   3   1 127.870 83.0646   2
 -22   3  -1 100.404 63.0470   2
 -21   3  -1 59.8165 58.1528   2
  21   3   1 122.528 77.2239   2
  21  -3  -1 164.573 76.5791   6
 -21  -3   1 226.004 108.605   5
 -21  -3   1 111.102 80.6993   4
  21  -3  -1 66.1943 83.3575   3
  21   3   1 69.3452 107.529   6
  21   3   1 24.7240 72.4166   3
 -21   3  -1 290.214 108.477   5
  20   3   1 107.178 88.0234   6
 -20  -3   1-2.01567 75.1746   4
 -20  -3   1 113.131 107.918   5
  20  -3  -1-27.6546 75.1306   3
  20  -3  -1-14.9652 76.5962   6
  20   3   1 155.736 93.7014   2
 -20   3  -1 259.183 122.104   5
 -20   3  -1-23.3863 54.4429   2
  20   3   1 86.7602 77.8900   3
  19  -3  -1 383.106 103.783   3
  19   3   1 187.363 82.2767   2
 -19   3  -1 259.955 101.134   5
  19   3   1 59.4781 23.0643   4
 -19  -3   1 137.570 82.1045   4
  19   3   1 245.550 86.9004   3
 -19   3  -1 240.547 57.5701   2
  19  -3  -1 209.198 76.6259   6
 -19  -3   1 219.175 121.916   5
  19   3   1 324.440 112.934   6
  18  -3  -1 6399.60 292.336   6
  18  -3  -1 6392.33 321.467   3
 -18  -3   1 6294.52 287.919   4
  18   3   1 6154.84 350.407   6
 -18  -3   1 6081.15 352.204   5
 -18   3  -1 6379.37 219.265   2
  18   3   1 6348.73 314.535   3
 -18   3  -1 6240.38 329.605   5
  18   3   1 6775.20 329.547   2
  17   3   1 498.202 111.074   6
 -17  -3   1 340.916 90.6803   4
  17   3   1 545.606 109.183   3
 -17   3  -1 115.611 83.6996   2
  17  -3  -1 576.113 100.850   6
  17   3   1 458.883 99.0883   2
 -17   3  -1 399.167 64.0296   2
  17  -3  -1 550.696 105.592   3
  17   3   1 358.620 52.4806   4
 -17  -3   1 620.016 134.055   5
 -17   3  -1 368.537 110.283   5
  16   3   1 412.031 119.619   6
  16  -3  -1 410.683 89.0920   6
  16   3   1 410.178 95.7395   3
 -16  -3   1 428.772 92.8669   4
  16   3   1 388.346 92.0324   2
 -16  -3   1 276.710 108.780   5
  16  -3  -1 365.709 87.7682   3
  16   3   1 382.384 59.3811   4
 -16   3  -1 420.240 96.0579   6
 -16   3  -1 298.377 76.5128   2
 -16   3  -1 456.715 67.4715   2
 -16   3  -1 287.517 92.0764   5
 -15   3  -1 34.7452 50.3763   2
  15   3   1 186.358 112.310   6
  15  -3  -1-169.496 101.883   5
 -15   3  -1 14.2981 38.8349   2
 -15  -3   1-27.5816 68.5036   4
 -15   3  -1 27.1476 68.5189   6
  15   3   1 42.8686 68.2362   2
  15   3   1 108.018 70.2317   3
  15  -3  -1 74.3388 61.7962   3
 -15  -3   1 57.0082 75.7681   5
  15  -3  -1 12.0098 54.6933   6
  15   3   1 30.5594 44.0208   4
  14  -3  -1 3668.66 223.785   3
 -14  -3   1 3340.79 239.339   5
  14  -3  -1 3607.36 195.780   6
  14   3   1 3541.36 214.430   2
 -14   3  -1 3625.62 178.738   6
  14   3   1 3590.37 217.360   3
 -14   3  -1 3836.75 141.179   2
  14   3   1 3601.63 246.454   6
  14   3   1 3364.92 158.947   4
  14  -3  -1 3244.35 182.149   5
 -14  -3   1 3721.65 213.423   4
 -13  -3   1 286.039 87.1548   5
 -13   3  -1 288.584 46.2471   2
  13   3   1 412.757 98.3862   6
  13  -3  -1 211.321 71.0036   3
  13   3   1 191.580 59.9175   4
 -13  -3   1 416.554 91.8993   4
 -13   3  -1 388.924 71.2912   6
  13  -3  -1 304.497 61.3089   6
  13   3   1 302.994 78.6534   2
  13   3   1 390.695 91.3094   3
  13  -3  -1 246.901 62.5874   5
 -13   3  -1 115.481 64.8704   3
  12  -3  -1 52457.4 777.233   3
 -12   3  -1 51031.1 620.453   3
  12  -3  -1 51974.1 681.291   6
  12   3   1 51103.4 841.088   6
  12   3   1 51817.5 646.357   4
  12  -3  -1 49702.8 602.585   5
 -12   3  -1 53853.2 558.083   6
  12   3   1 51932.0 754.535   3
 -12  -3   1 57649.5 814.227   4
  12   3   1 50461.2 754.097   2
 -12   3  -1 49653.7 421.415   2
 -12  -3   1 50689.2 843.755   5
 -11   3  -1 259.091 36.8732   2
  11   3   1 182.577 65.9221   3
 -11   3  -1 319.109 63.6698   3
  11  -3  -1 251.852 61.2359   5
  11  -3  -1 258.738 65.6684   6
 -11  -3   1 344.979 87.6942   5
  11  -3  -1 204.910 60.5653   3
 -11  -3   1 199.455 82.8008   4
 -11   3  -1 126.404 69.6378   5
  11   3   1 194.582 70.5262   2
 -11   3  -1 365.982 57.9503   6
  11   3   1 109.644 58.9938   4
  11   3   1 304.169 84.4382   6
 -10   3  -1 14023.5 315.382   5
  10   3   1 14308.0 420.716   6
 -10   3  -1 15406.5 301.626   3
  10   3   1 14035.5 350.058   4
 -10  -3   1 16556.8 433.870   4
  10  -3  -1 14599.7 284.910   5
  10   3   1 15358.0 397.514   2
 -10  -3   1 13821.0 416.267   5
  10   3   1 15051.5 384.100   3
  10  -3  -1 16007.1 363.167   6
  10  -3  -1 15433.6 397.053   3
   9   3   1 287.553 75.4115   4
   9   3   1 352.373 87.8238   6
   9  -3  -1 277.912 64.3258   6
   9  -3  -1 326.625 70.6077   3
   9  -3  -1 314.963 51.5893   5
  -9   3  -1 121.016 49.1538   5
  -9   3  -1 190.681 46.5111   3
   9   3   1 277.455 68.5443   3
  -9  -3   1 137.879 67.3937   4
  -9  -3   1 308.616 86.8582   5
   9   3   1 298.464 67.4169   2
  -8  -3   1 104156. 1051.56   5
  -8   3  -1 108860. 681.478   3
  -8   3  -1 102452. 767.829   5
   8   3   1 103285. 1046.30   6
   8  -3  -1 107602. 975.399   3
   8  -3  -1 103424. 836.563   6
   8   3   1 101372. 954.160   4
   8   3   1 104323. 942.019   2
   8  -3  -1 103973. 624.571   5
  -7  -3   1 663.653 94.0189   4
   7   3   1 456.115 74.2375   2
  -7   3  -1 682.243 72.4045   5
   7   3   1 489.490 89.2572   6
  -7   3  -1 661.125 55.7322   3
  -7  -3   1 591.020 92.8414   5
   7  -3  -1 546.308 79.9816   3
   7   3   1 532.628 91.8955   4
   7  -3  -1 568.784 73.2601   6
   6  -3  -1 167.866 52.2519   3
   6  -3  -1 89.5476 49.9626   2
  -6  -3   1 132.421 54.6284   5
  -6   3  -1 204.196 33.5428   3
   6  -3  -1 173.100 43.9019   6
   6   3   1 154.277 63.4570   6
   6   3   1 197.691 57.0569   2
   6  -3  -1 68.1066 48.8520   4
   6   3   1 130.078 63.4680   4
  -6   3  -1 217.876 49.9964   5
  -5  -3   1 1048.92 109.436   3
   5   3   1 1320.93 114.253   6
   5  -3  -1 1352.55 103.192   3
   5   3   1 1320.60 102.833   2
  -5   3  -1 1359.07 83.2182   5
  -5  -3   1 190.720 75.0552   2
   5  -3  -1 1396.22 101.363   2
  -5   3  -1 1499.11 66.9405   3
  -5  -3   1 1259.58 107.765   5
   5   3   1 1332.89 121.427   4
  -5  -3   1 686.272 113.574   6
   5  -3  -1 1523.45 112.251   4
  -4  -3   1 5131.14 198.304   5
   4   3   1 5441.24 186.087   2
   4  -3  -1 5387.91 177.159   2
   4  -3  -1 5410.18 196.570   4
   4  -3  -1 5326.53 187.519   3
  -4  -3   1 5696.88 229.701   2
   4   3   1 5163.66 217.046   4
  -4   3  -1 5177.93 152.670   5
   4   3   1 5427.23 206.649   6
  -4  -3   1 5403.02 212.061   3
  -4  -3   1 5648.75 242.891   6
   3  -3  -1 366.048 67.4213   4
   3  -3  -1 246.037 47.5680   3
   3   3   1 293.868 49.7705   2
  -3  -3   1 212.590 65.7291   6
  -3  -3   1 190.767 55.1768   3
   3   3   1 244.042 52.6447   6
  -3   3  -1 248.969 44.6442   5
  -3  -3   1 155.303 45.7032   5
  -3  -3   1 245.309 62.3893   2
   3  -3  -1 227.964 32.4082   5
   3   3   1 250.729 65.5662   4
   3  -3  -1 274.467 47.7295   2
  -2   3  -1 861.185 68.6075   5
   2  -3  -1 932.285 75.5777   2
   2  -3  -1 965.832 60.3298   5
   2   3   1 829.500 93.6904   4
  -2  -3   1 947.202 90.0742   2
  -2  -3   1 825.319 81.2500   3
  -2   3  -1 923.821 61.8353   2
   2   3   1 850.899 80.1053   6
   2   3   1 963.104 77.3022   2
  -2  -3   1 958.710 97.7692   6
   2  -3  -1 829.724 90.9162   4
  -2  -3   1 827.013 78.8908   5
  -1   3  -1 269.272 39.3862   2
  -1  -3   1 260.312 46.8709   5
  -1   3  -1 302.490 50.1879   5
   1   3   1 311.535 55.0931   6
  -1  -3   1 376.617 69.9752   6
  -1   3  -1 286.751 44.6403   6
   1  -3  -1 264.730 42.5250   5
   1  -3  -1 206.975 60.1847   4
   1   3   1 334.107 69.1547   4
   1  -3  -1 244.151 45.1047   2
   1   3   1 318.140 47.2749   2
   1  -3  -1 234.346 47.3771   6
  -1  -3   1 313.411 54.4785   2
   0   3  -1 107638. 779.344   5
   0  -3  -1 114386. 815.258   6
   0   3  -1 114852. 764.049   6
   0   3   1 113799. 966.518   4
   0   3   1 112317. 760.718   2
   0  -3   1 113696. 761.074   5
   0   3   1 118048. 840.758   6
   0  -3   1 121630. 821.484   6
   0   3  -1 111574. 731.798   3
   0  -3  -1 115087. 967.652   4
   0  -3  -1 112542. 763.751   2
   0   3  -1 114866. 749.921   2
   0  -3   1 120468. 778.923   2
   0  -3  -1 121190. 788.805   5
  -1   3   1 211.564 60.3254   4
   1   3  -1 344.310 56.1302   2
   1   3  -1 282.709 46.9594   3
   1   3  -1 290.421 55.5372   5
  -1   3   1 269.551 48.9173   6
  -1  -3  -1 238.350 55.0923   5
   1  -3   1 272.508 42.0536   2
  -1   3   1 267.292 44.1286   5
  -1  -3  -1 279.018 49.8122   2
  -1  -3  -1 290.142 61.9244   4
  -1   3   1 262.349 44.8508   2
   1   3  -1 310.464 55.5079   6
   1  -3   1 309.865 49.5876   6
  -1  -3  -1 208.115 47.6465   6
   1  -3   1 240.372 43.0362   5
   2   3  -1 787.435 78.6394   5
  -2   3   1 877.813 77.9507   3
  -2  -3  -1 847.002 82.7303   6
  -2   3   1 887.436 71.4794   2
  -2  -3  -1 891.869 94.2917   5
   2   3  -1 694.019 71.2271   3
  -2  -3  -1 864.053 74.8188   2
  -2  -3  -1 926.939 100.693   4
   2   3  -1 984.199 84.7289   2
  -2   3   1 980.633 96.8833   4
   2  -3   1 910.202 68.4163   5
   2  -3   1 906.086 60.6999   2
   2   3  -1 793.172 86.2311   6
  -2   3   1 970.955 79.0974   6
  -2   3   1 894.423 60.7683   5
  -3  -3  -1 179.337 43.6005   2
  -3  -3  -1 290.421 62.6645   6
   3   3  -1 180.615 45.3139   2
  -3  -3  -1 286.937 64.3095   5
  -3   3   1 303.295 37.6995   5
  -3   3   1 323.451 64.6524   4
   3   3  -1 192.054 56.8463   5
   3   3  -1 203.977 44.5077   3
  -3  -3  -1 303.292 69.5365   4
   3   3  -1 189.954 53.1285   6
  -3   3   1 223.542 42.2099   2
   3  -3   1 233.039 40.9866   5
  -3   3   1 212.983 48.6890   3
  -4   3   1 6212.94 209.148   3
   4   3  -1 5527.79 206.731   2
   4  -3   1 5211.17 148.852   5
   4   3  -1 5557.11 226.886   6
  -4   3   1 5655.74 175.936   2
   4   3  -1 5383.56 202.816   3
  -4   3   1 5260.08 175.150   6
  -4  -3  -1 5465.38 225.351   4
   4   3  -1 5353.28 219.939   5
  -4  -3  -1 5428.87 217.003   6
  -4  -3  -1 5591.92 229.205   5
  -4   3   1 5133.65 200.731   4
   4   3  -1 5397.86 218.481   4
  -4  -3  -1 5011.70 185.404   2
  -5  -3  -1 1370.70 127.964   5
  -5   3   1 1504.47 101.435   2
  -5   3   1 1304.31 106.349   4
  -5  -3  -1 1133.16 101.305   2
   5  -3   1 1209.64 80.5853   5
  -5   3   1 1186.18 90.3922   6
  -5  -3  -1 197.833 74.5499   6
  -5  -3  -1 1370.49 119.707   4
   5   3  -1 1550.19 133.522   6
   5   3  -1 1560.61 120.469   3
   5   3  -1 1430.85 127.460   4
   6   3  -1 177.997 72.7142   6
   6  -3   1 195.036 50.4106   5
  -6  -3  -1 68.9022 53.8010   2
   6   3  -1 124.762 70.8977   4
  -6   3   1 191.151 50.5167   2
  -6   3   1 62.8191 51.2930   4
  -6   3   1 102.403 47.8275   6
  -6  -3  -1 69.5596 58.6465   5
   6   3  -1 131.115 51.0162   3
  -6  -3  -1 131.085 62.2714   4
   7  -3   1 711.029 75.0153   5
   7   3  -1 656.252 91.3123   3
  -7   3   1 598.873 84.0215   6
   7  -3   1 667.003 53.5415   3
  -7   3   1 538.492 69.7045   2
  -7   3   1 395.211 71.2966   4
  -7  -3  -1 598.509 92.3262   4
   7   3  -1 738.595 114.836   6
   7   3  -1 591.147 108.591   4
  -7  -3  -1 353.356 86.5708   5
   8   3  -1 114574. 1087.03   4
  -8  -3  -1 105510. 1150.41   5
   8  -3   1 107550. 636.890   3
   8   3  -1 104557. 1121.75   6
  -8   3   1 105472. 849.696   2
  -8  -3  -1 105766. 1003.18   4
   8  -3   1 104485. 804.976   5
  -8   3   1 103310. 525.986   5
  -8   3   1 102581. 778.374   4
   8   3  -1 103345. 1034.11   3
   9  -3   1 229.913 44.9343   3
   9   3  -1 144.911 60.6388   3
   9   3  -1 325.972 104.210   6
  -9   3   1 320.784 60.1968   4
   9   3  -1 278.854 89.4147   4
  -9   3   1 261.984 57.7537   2
  -9  -3  -1 387.140 82.1116   4
   9   3  -1 118.080 43.9288   4
   9  -3   1 240.030 63.4142   5
  -9   3   1 293.789 43.6066   5
  -9  -3  -1 366.531 92.6414   5
 -10   3   1 14994.1 340.629   2
  10  -3   1 14421.8 332.175   5
  10   3  -1 14827.2 450.796   6
  10   3  -1 15038.5 403.647   4
 -10  -3  -1 14211.7 457.009   5
 -10   3   1 14014.0 238.890   5
  10   3  -1 15199.8 314.081   4
  10   3  -1 13598.4 398.662   3
 -10  -3  -1 14699.3 385.266   4
  10  -3   1 14070.4 265.310   3
 -10   3   1 12532.8 247.783   4
 -11  -3  -1 200.362 72.2783   4
  11  -3   1 219.062 47.3197   6
  11   3  -1 206.650 70.3847   3
 -11   3   1 186.394 47.5596   5
  11   3  -1 279.549 85.3458   4
  11  -3   1 290.494 52.8414   3
 -11   3   1 203.268 62.1538   2
  11   3  -1 255.284 87.6663   6
 -11  -3  -1 229.597 86.4002   5
  11  -3   1 362.306 76.4337   5
  11   3  -1 280.379 57.7466   4
 -12  -3  -1 52260.8 735.618   4
 -12   3   1 51863.2 553.247   5
  12  -3   1 52741.1 585.012   3
 -12   3   1 50754.2 665.259   2
 -12  -3  -1 52021.2 932.518   5
  12   3  -1 48383.9 800.838   3
  12  -3   1 49719.7 499.220   6
  12   3  -1 52083.1 562.190   4
  12  -3   1 48727.2 669.042   5
  12   3  -1 55136.1 736.676   4
  12   3  -1 51315.0 882.291   6
  13  -3   1 317.880 55.4791   6
 -13   3   1 383.631 66.8045   5
 -13   3   1 251.702 57.3935   2
  13   3  -1 349.337 80.6603   3
  13   3  -1 331.276 56.6804   4
  13   3  -1 359.922 111.043   6
  13  -3   1 323.612 60.7534   3
  13   3  -1 334.424 79.2109   4
 -13  -3  -1 386.342 81.8044   4
 -13  -3  -1 369.267 99.0806   5
  14   3  -1 3628.58 140.035   4
  14   3  -1 3373.66 233.607   3
 -14   3   1 3680.07 179.943   5
  14  -3   1 3628.87 173.643   3
 -14   3   1 3642.71 192.481   2
  14   3  -1 3398.70 176.238   4
 -14  -3  -1 3472.91 267.113   5
 -14  -3  -1 3472.90 199.491   4
  14   3  -1 3564.44 253.634   6
  14  -3   1 3349.62 155.883   6
  15   3  -1-111.007 53.9732   4
  15   3  -1 17.7381 29.7305   4
 -15   3   1 30.8866 59.1906   5
  15   3  -1 94.1647 72.9710   3
  15  -3   1 71.7898 46.8447   6
  15   3  -1 46.2657 79.0329   6
 -15  -3  -1-73.2628 97.4235   5
 -15   3   1 1.41635 48.6581   2
  15  -3   1 26.4203 44.0185   3
 -15  -3  -1-81.0639 63.7711   4
  16  -3   1 342.206 63.9265   6
  16   3  -1 391.854 64.5644   4
  16   3  -1 371.098 46.6475   4
  16  -3   1 479.423 81.5517   3
 -16   3   1 381.223 83.9712   2
  16   3  -1 392.232 103.669   6
 -16  -3  -1 323.694 115.900   5
  16   3  -1 425.721 106.007   3
 -16  -3  -1 522.551 95.8922   4
 -16   3   1 426.472 87.2698   5
  17   3  -1 349.939 111.249   3
 -17  -3  -1 835.521 172.694   5
 -17   3   1 633.247 100.286   5
  17   3  -1 383.577 44.4815   4
 -17   3   1 479.708 83.8021   2
  17  -3   1 358.515 69.9612   6
  17  -3   1 379.551 76.6372   3
  17   3  -1 338.886 53.0257   4
  17   3  -1 313.158 107.857   6
 -17  -3  -1 798.950 109.342   4
 -18   3   1 6559.73 286.064   2
 -18  -3  -1 6321.53 384.756   5
  18  -3   1 6437.32 266.085   3
 -18  -3  -1 6448.57 283.552   4
  18  -3   1 6004.19 243.929   6
  18   3  -1 6271.36 344.182   3
 -18   3   1 6921.90 299.425   5
  18   3  -1 5970.76 345.340   6
 -19   3   1 176.553 83.8830   5
  19   3  -1 227.617 102.431   3
 -19   3   1 299.762 76.8544   2
  19  -3   1 204.244 67.0252   3
 -19  -3  -1 243.244 116.870   5
 -19  -3  -1 379.604 99.1931   4
  19  -3   1 290.609 85.1605   6
  19   3  -1 211.981 107.291   6
  20   3  -1 12.0391 80.7333   3
  20  -3   1-48.7578 75.9348   6
 -20  -3  -1 129.430 129.960   5
 -20  -3  -1 45.9010 74.2183   4
 -20   3   1 36.9475 63.8562   2
  20  -3   1 12.8641 48.3350   3
  20   3  -1-20.9550 79.1190   6
 -20   3   1-7.79010 76.6496   5
 -21  -3  -1 171.359 119.316   5
  21  -3   1 130.193 70.0694   6
  21   3  -1 130.769 82.4468   3
 -21   3   1 87.2071 84.4864   5
  21  -3   1 188.909 65.9238   3
 -21   3   1 70.2748 60.1993   2
 -21  -3  -1 198.963 89.4577   4
  21   3  -1 433.048 131.876   6
 -22   3   1-23.0030 108.231   5
 -22   3   1 74.2662 81.4747   2
 -22  -3  -1 52.6945 71.4796   4
 -22  -3  -1 165.123 124.512   5
  22  -3   1 38.1091 51.8347   3
  22  -3   1 207.026 78.5262   6
  23  -3   1 146.123 71.7233   3
 -23  -3  -1 142.490 132.654   5
  23  -3   1 282.482 84.4615   6
 -23  -3  -1 242.703 89.7740   4
 -23   3   1 290.332 96.7583   2
 -23   3   1 132.748 100.961   5
  24  -3   1 3679.88 235.819   6
 -24  -3  -1 3947.90 361.406   5
 -24  -3  -1 3915.19 241.376   4
  24  -3   1 3806.75 247.408   3
 -24   3   1 4860.00 321.110   5
 -24   3   1 4093.40 263.320   2
 -25   3   1 362.382 111.948   2
 -25  -3  -1 426.928 119.609   4
  25   3  -1 389.356 142.833   3
 -25   3   1 348.205 128.861   5
 -25  -3  -1 449.894 178.068   5
  25  -3   1 262.600 83.9333   3
  25  -3   1 159.122 88.3529   6
  26   3  -1 251.189 135.082   3
  26  -3   1 53.6148 74.3915   6
  26   3  -1 88.7960 129.230   6
 -26   3   1 48.3279 130.513   5
 -26   3   1 205.539 95.2529   2
  26  -3   1 114.848 65.1074   3
 -26  -3  -1 73.3284 89.2358   4
 -26  -3  -1-119.658 158.274   5
 -27   3   1 204.923 104.023   2
 -27  -3  -1 204.149 188.950   5
  27  -3   1 111.709 80.9844   6
  27   3  -1 102.501 131.883   3
  27  -3   1 64.1383 81.4630   3
 -27   3   1 111.735 142.021   5
 -27  -3  -1-149.911 114.843   4
  27   3  -1 95.5874 148.685   6
  28  -3   1-47.9581 81.2521   6
  28   3  -1-32.1094 133.739   3
  28   3  -1 129.845 133.682   6
 -28   3   1-12.5213 89.7107   2
 -28  -3  -1-75.0878 168.331   5
 -28  -3  -1 106.812 104.703   4
  28  -3   1 10.6899 76.9404   3
 -28   3   1-116.820 147.946   5
  29   3  -1 520.075 183.867   3
  29  -3   1 436.288 118.268   6
 -29   3   1 578.846 147.900   2
 -29  -3  -1 642.488 155.016   4
  29   3  -1 549.781 173.976   6
  29  -3   1 392.467 114.658   3
 -29   3   1 275.282 146.363   5
 -29  -3  -1 670.270 224.347   5
 -30  -3  -1 287.251 188.395   5
 -30  -3  -1 499.650 132.904   4
  30   3  -1 343.960 171.529   3
 -30   3   1 415.825 163.084   5
  30   3  -1 513.302 180.385   6
 -30   3   1 318.136 118.630   2
  30  -3   1 346.335 114.976   6
  31   3  -1 120.398 157.189   6
 -31  -3  -1 290.226 136.619   4
 -31   3   1 72.9996 149.881   5
 -31   3   1 102.377 101.689   2
  31   3  -1-32.6785 147.157   3
  31  -3   1 112.385 97.3042   6
 -31  -3  -1 381.481 244.093   5
  32  -3   1 813.070 159.278   6
 -32  -3  -1 801.751 179.106   4
 -32  -3  -1 1081.83 266.127   5
 -32   3   1 798.370 188.681   5
  32   3  -1 906.434 219.193   3
 -32   3   1 1157.64 190.129   2
  32   3  -1 976.194 236.292   6
 -33  -3  -1-446.575 229.861   5
 -33  -3  -1 163.831 151.981   4
 -33   3   1 1.80431 132.557   2
  33  -3   1-86.4268 121.991   3
 -33   3   1 226.089 189.778   5
  33   3  -1 243.189 184.085   6
  33  -3   1 66.7710 103.331   6
  33   3  -1 181.261 180.595   3
  34   3  -1 1027.57 230.761   3
  34   3  -1 927.414 241.201   6
 -34   3   1 1409.43 214.038   2
 -34   3   1 1361.84 279.467   5
 -34  -3  -1 841.545 185.936   4
  34  -3   1 1281.20 204.353   3
 -34  -3  -1 1165.76 313.794   5
 -35   3   1 885.363 267.101   5
 -35   3   1 731.898 182.227   2
 -35  -3  -1 889.329 304.882   5
  35   3  -1 441.182 190.271   3
  35  -3   1 432.665 152.253   3
 -35  -3  -1 398.749 178.095   4
  35   3  -1 286.619 187.193   6
  36   3  -1 2056.74 308.052   3
 -36  -3  -1 2121.24 377.997   5
 -36   3   1 2436.20 359.785   5
  36  -3   1 1997.87 250.906   3
  36   3  -1 2125.03 308.462   6
 -36   3   1 2319.30 268.583   2
 -36  -3  -1 2320.23 292.682   4
 -37   3   1 227.027 273.810   5
  37  -3   1 436.868 174.822   3
 -37   3   1 213.499 177.139   2
  37   3  -1 279.431 200.619   6
  37   3  -1 369.446 223.424   3
 -37  -3  -1 332.350 249.500   5
 -37  -3  -1-63.5477 229.499   4
 -38   3   1 6144.70 534.153   5
 -38   3   1 6513.47 435.032   2
  38   3  -1 5177.75 447.531   6
 -38  -3  -1 6097.66 474.306   2
 -38  -3  -1 6234.75 600.901   5
  38  -3   1 5661.53 406.815   3
  38   3  -1 5594.60 484.447   3
  38  -3   1 5540.63 395.175   6
 -39   3   1 625.610 361.361   5
 -39  -3  -1 432.174 232.384   2
 -39   3   1 284.179 188.130   2
 -39  -3  -1 582.308 317.357   5
  39   3  -1 314.576 220.515   3
  39  -3   1 186.998 178.846   3
  39   3  -1-128.646 189.254   6
 -40   3   1 53.3818 185.598   2
  40   3  -1-37.8870 177.585   6
 -40   3   1-468.716 332.217   5
  40   3  -1-75.2551 219.149   3
 -40  -3  -1 341.902 293.972   5
 -40  -3  -1 8.52566 234.511   2
  40  -3   1 247.295 172.234   3
  41   3  -1 318.745 241.201   3
 -41  -3  -1 40.2236 227.062   2
  41  -3   1-124.514 153.187   3
  41   3  -1-12.2432 198.612   6
 -41   3   1 63.4055 200.459   2
  42   3  -1 216.070 201.764   3
  42   3  -1 128.240 210.590   6
 -42  -3  -1 454.837 260.853   2
  42  -3   1 400.484 193.853   3
 -42   3   1 305.086 232.935   2
 -42  -3  -1 100.580 311.062   5
 -43  -3  -1 731.265 371.047   5
  43   3  -1 407.060 237.825   6
  43   3  -1 475.820 228.386   3
  43  -3   1 144.512 160.687   3
 -43   3   1 440.422 232.861   2
 -43  -3  -1 420.922 266.499   2
  43   4   1 345.735 233.821   3
  43  -4  -1-459.052 279.839   6
  43   4   1 398.585 269.420   6
  43  -4  -1-155.234 210.405   3
 -43  -4   1 185.158 220.761   2
 -43  -4   1-111.597 340.955   5
  42   4   1 370.699 221.806   3
 -42  -4   1 47.8394 215.802   2
  42  -4  -1 452.173 208.151   3
  42   4   1 341.880 236.034   6
 -42  -4   1 688.476 351.859   5
  42  -4  -1 136.398 170.304   6
  41   4   1 478.450 265.161   6
  41  -4  -1 302.936 205.424   6
  41   4   1 98.7227 190.417   3
  41  -4  -1-96.6724 189.667   3
 -41  -4   1 710.481 344.537   5
 -41   4  -1-7.74525 348.152   5
 -41  -4   1 386.420 247.914   2
  40   4   1-245.435 228.037   3
 -40  -4   1 33.6533 253.309   5
 -40   4  -1 41.2961 328.544   5
  40  -4  -1-104.519 184.363   3
  40   4   1-353.070 262.865   6
  40  -4  -1-57.4625 163.089   6
 -40  -4   1 364.207 224.244   2
  39  -4  -1 60.0917 146.208   6
 -39   4  -1-60.7055 304.118   5
  39   4   1 272.604 219.809   6
 -39  -4   1 46.5432 246.319   5
  39  -4  -1 109.348 163.802   3
 -39  -4   1-93.2659 189.566   2
  39   4   1 433.681 218.341   3
 -38   4  -1 2485.94 412.314   5
  38  -4  -1 2839.02 315.433   6
 -38  -4   1 2499.91 402.234   5
  38   4   1 2217.62 336.832   6
 -38  -4   1 2428.15 329.675   2
  38   4   1 2298.19 304.444   3
  38  -4  -1 2429.03 304.623   3
  37  -4  -1 127.037 166.697   3
 -37   4  -1-85.9400 156.270   2
 -37  -4   1 42.6240 170.520   2
 -37  -4   1 51.3394 224.549   5
 -37   4  -1-81.6610 298.460   5
  37  -4  -1 152.258 168.998   6
 -37  -4   1-179.540 215.829   4
  37   4   1 265.203 212.666   3
  37   4   1 309.843 225.334   6
  36   4   1 1344.72 250.413   3
  36  -4  -1 1633.34 267.340   3
 -36  -4   1 1152.89 255.435   4
 -36  -4   1 1757.59 301.350   2
 -36   4  -1 1486.40 335.108   5
 -36   4  -1 1501.99 206.979   2
  36   4   1 1232.85 283.178   6
  36  -4  -1 1565.55 242.945   6
 -36  -4   1 1373.25 310.955   5
 -35  -4   1 610.441 241.626   5
 -35   4  -1 70.1579 120.457   2
  35  -4  -1 140.453 141.418   3
  35   4   1 303.884 222.051   6
 -35  -4   1 482.621 249.865   4
  35  -4  -1 190.225 149.509   6
 -35   4  -1 69.0919 225.640   5
  35   4   1 148.123 176.177   3
 -35  -4   1 16.7561 160.360   2
  34   4   1 201.362 173.821   3
  34  -4  -1 101.898 126.395   6
  34  -4  -1 84.2385 152.080   3
 -34  -4   1 143.742 178.514   2
  34   4   1-13.3270 169.459   6
 -34   4  -1-398.060 237.170   5
 -34  -4   1 272.158 196.991   4
 -34  -4   1-77.9378 186.183   5
 -34   4  -1 241.310 138.826   2
 -33  -4   1 93.7320 169.360   4
  33   4   1 159.048 175.634   6
  33  -4  -1 148.795 123.503   6
  33   4   1-71.0803 157.351   3
 -33  -4   1-211.088 149.053   2
  33  -4  -1-84.8838 146.213   3
 -33   4  -1 144.036 120.561   2
 -33  -4   1-11.8012 182.149   5
 -33   4  -1 313.013 216.170   5
 -32  -4   1 385.292 157.772   2
  32   4   1 402.616 207.513   6
 -32   4  -1 118.737 165.989   5
 -32   4  -1 330.246 122.234   2
 -32  -4   1 352.294 214.273   5
  32  -4  -1 399.550 158.571   3
 -32  -4   1 352.274 170.810   4
  32   4   1 171.625 134.926   3
  31   4   1-29.4173 152.720   6
 -31  -4   1 84.7889 126.656   4
 -31  -4   1 31.8436 144.100   2
  31   4   1 16.4972 137.997   3
  31  -4  -1 54.9141 128.798   3
 -31  -4   1-226.031 203.626   5
 -31   4  -1 36.4553 98.6244   2
 -31   4  -1 136.541 172.139   5
  30   4   1 486.092 190.332   6
 -30  -4   1 598.424 161.230   4
  30  -4  -1 424.864 164.523   3
 -30   4  -1 607.518 135.503   2
 -30  -4   1 415.108 168.793   2
 -30   4  -1 585.888 186.550   5
  30   4   1 518.584 166.276   3
 -30  -4   1 847.997 239.767   5
 -29   4  -1 260.785 103.586   2
  29   4   1 233.721 154.689   6
 -29   4  -1 162.936 147.923   5
 -29  -4   1 428.240 214.875   5
 -29  -4   1 410.249 172.775   2
  29   4   1 20.1907 126.421   3
  29  -4  -1 168.181 135.099   3
 -29  -4   1 260.943 146.737   4
 -28   4  -1 139.647 147.615   5
 -28  -4   1-35.2275 126.243   4
  28  -4  -1 15.8350 120.549   3
 -28  -4   1 106.002 153.631   5
  28   4   1 88.4033 155.471   6
 -28   4  -1 19.3516 88.2539   2
 -27  -4   1 397.328 145.058   4
  27  -4  -1 358.010 149.421   3
 -27  -4   1 412.057 158.720   5
  27  -4  -1 209.213 95.8805   6
 -27   4  -1 304.751 100.579   2
 -27   4  -1 436.785 175.438   5
  26  -4  -1 1668.20 186.586   6
 -26   4  -1 1611.24 156.185   2
 -26   4  -1 1682.81 250.220   5
 -26  -4   1 1430.50 245.675   5
 -26  -4   1 1352.11 184.196   4
 -25  -4   1 136.306 112.275   5
  25   4   1 124.485 93.0412   2
 -25   4  -1 54.4600 73.2855   2
 -25   4  -1 32.4405 122.841   5
 -25  -4   1 99.9960 114.090   4
  25  -4  -1 51.1998 84.9402   6
 -24   4  -1 110.003 80.4241   2
 -24  -4   1-124.818 107.707   4
 -24  -4   1 37.1261 119.518   5
  24   4   1 37.7586 80.0287   3
  24   4   1 102.346 105.020   2
 -24   4  -1 171.054 126.006   5
  24  -4  -1 90.5233 75.6553   6
 -23  -4   1 736.006 138.433   4
  23   4   1 675.791 132.392   3
  23   4   1 571.496 158.542   6
 -23   4  -1 700.938 156.752   5
 -23  -4   1 754.010 174.418   5
  23   4   1 621.012 119.630   2
 -23   4  -1 1019.49 117.898   2
  23  -4  -1 630.808 116.025   6
  22   4   1 22402.9 649.317   2
  22  -4  -1 23017.9 658.010   3
 -22   4  -1 23180.6 678.345   5
  22   4   1 21457.6 710.047   6
 -22   4  -1 24023.1 475.676   2
 -22  -4   1 21645.9 727.808   5
 -22  -4   1 22293.6 609.544   4
  22   4   1 22515.7 660.818   3
  22  -4  -1 22901.4 587.080   6
 -21   4  -1 540.074 120.565   5
 -21  -4   1 600.027 120.714   4
  21   4   1 571.148 137.632   6
  21  -4  -1 654.898 108.102   6
 -21  -4   1 725.142 170.561   5
  21   4   1 612.287 119.783   2
  21  -4  -1 832.102 143.028   3
  21   4   1 742.572 132.007   3
 -21   4  -1 811.523 98.3373   2
  21   4   1 417.068 60.3335   4
  20  -4  -1 12096.1 406.724   6
 -20  -4   1 11244.1 508.468   5
 -20   4  -1 12183.8 314.085   2
 -20   4  -1 12004.7 469.456   5
  20   4   1 11796.2 511.095   6
  20  -4  -1 12369.8 463.699   3
  20   4   1 10720.1 261.710   4
  20   4   1 11958.9 460.839   3
 -20  -4   1 12021.3 438.949   4
  20   4   1 12870.3 488.278   2
 -19   4  -1 1960.05 197.073   5
 -19   4  -1 1956.84 128.806   2
  19   4   1 1171.87 155.167   3
 -19  -4   1 2011.97 188.697   4
  19  -4  -1 1585.85 177.492   3
  19   4   1 1224.32 186.401   6
  19   4   1 1132.49 154.934   2
 -19  -4   1 1704.42 207.808   5
  19  -4  -1 1434.87 145.771   6
  18  -4  -1-73.6243 70.5305   6
 -18   4  -1-89.1419 89.7714   5
  18  -4  -1 30.9249 78.7455   3
  18   4   1 85.0255 88.7932   3
 -18  -4   1 108.661 104.349   4
 -18   4  -1-23.4776 48.0331   2
 -18   4  -1-150.872 110.010   6
  18   4   1 49.0676 107.604   6
  18   4   1 166.741 91.5335   2
 -18  -4   1 119.515 109.022   5
 -17   4  -1 180.360 98.9791   5
 -17  -4   1-70.0738 101.833   5
 -17  -4   1-49.5531 74.6625   4
  17  -4  -1 110.291 66.7271   6
 -17   4  -1-27.1811 43.8248   2
  17  -4  -1-3.96501 59.6218   3
  17   4   1 34.1774 76.7549   2
 -17   4  -1-139.858 90.9263   6
  17   4   1 20.4929 89.8177   6
  17   4   1-26.0781 70.5286   3
  16   4   1 2208.17 189.907   2
 -16  -4   1 1927.47 175.991   4
  16  -4  -1 2167.32 155.115   5
  16  -4  -1 2302.30 187.264   3
  16  -4  -1 2343.77 163.341   6
 -16   4  -1 2210.31 114.578   2
 -16   4  -1 1984.34 146.022   6
  16   4   1 2467.12 239.030   6
 -16  -4   1 1995.87 206.941   5
  16   4   1 2310.43 193.169   3
  15   4   1 78.1451 75.1296   3
 -15  -4   1 3.40217 86.0649   5
  15   4   1 171.018 79.8677   2
 -15   4  -1 184.843 50.2693   2
  15  -4  -1 130.629 67.6330   5
 -15  -4   1 125.881 73.7031   4
  15  -4  -1 106.466 58.0420   6
 -15   4  -1 46.8116 62.3109   6
  15  -4  -1 25.8295 57.3029   3
  15   4   1 128.602 77.8036   6
  14   4   1 13379.2 428.241   3
 -14   4  -1 13326.6 236.041   2
  14   4   1 13681.4 489.558   6
 -14  -4   1 12739.3 466.018   5
  14  -4  -1 14023.0 378.022   6
  14  -4  -1 13924.8 433.328   3
 -14   4  -1 13788.2 305.293   6
 -14  -4   1 14241.7 449.241   4
  14  -4  -1 12942.3 315.711   5
  14   4   1 13696.2 439.899   2
 -13   4  -1 264.714 58.5223   6
 -13  -4   1 251.540 86.1261   4
 -13  -4   1 154.813 78.9654   5
  13   4   1 199.484 72.2371   3
  13  -4  -1 278.262 74.9026   3
  13  -4  -1 173.359 50.4790   5
  13  -4  -1 240.041 66.1354   6
  13   4   1 279.876 90.5776   6
  13   4   1 196.916 72.9626   2
 -13   4  -1 254.082 42.2807   2
  12   4   1-2.25407 65.0741   6
 -12  -4   1 50.0118 81.6535   4
 -12   4  -1-143.828 79.7597   3
 -12  -4   1 72.3215 73.6551   5
  12   4   1 35.3278 53.7575   2
  12  -4  -1 27.1077 46.5478   6
  12  -4  -1-77.0534 50.0321   3
 -12   4  -1-6.08319 36.8188   6
 -12   4  -1 24.8323 24.6142   2
  12  -4  -1 66.5688 40.8671   5
  12   4   1 34.4094 58.5635   3
  11   4   1 1098.76 127.389   3
  11  -4  -1 874.966 72.3562   5
  11   4   1 1179.53 148.767   6
 -11   4  -1 750.324 85.2536   3
  11  -4  -1 967.995 94.8090   6
 -11   4  -1 652.811 47.3243   2
  11  -4  -1 911.582 112.022   3
 -11  -4   1 723.454 124.953   5
 -11   4  -1 552.329 80.7643   5
  11   4   1 974.685 119.676   2
 -11  -4   1 508.142 108.052   4
 -10   4  -1 142414. 942.720   5
 -10   4  -1 145517. 956.454   3
  10   4   1 148961. 1296.74   3
  10   4   1 148442. 1290.89   2
 -10  -4   1 145485. 1403.94   5
  10  -4  -1 150241. 1261.17   3
  10   4   1 145867. 1411.26   6
  10  -4  -1 146509. 1073.15   6
   9  -4  -1 349.671 79.6816   3
   9  -4  -1 256.434 60.6996   6
  -9   4  -1 466.036 60.3696   3
  -9   4  -1 343.485 56.9986   5
   9   4   1 102.750 78.5182   6
  -9  -4   1 376.584 86.9861   5
   9   4   1 263.436 70.2733   2
  -9  -4   1 419.309 90.0201   4
   8  -4  -1 3200.13 155.964   6
  -8  -4   1 3547.02 211.442   4
   8   4   1 3060.79 177.726   2
  -8   4  -1 3103.19 133.344   5
   8  -4  -1 2757.90 125.661   4
  -8  -4   1 3264.89 205.289   5
  -8   4  -1 3219.95 129.063   3
   8   4   1 3008.52 198.389   6
   8  -4  -1 3012.63 170.634   3
  -7  -4   1 1243.48 129.828   4
  -7   4  -1 1310.90 82.6661   3
  -7   4  -1 1145.12 83.8925   5
   7  -4  -1 1119.88 102.700   4
  -7  -4   1 1067.43 121.793   5
   7  -4  -1 1119.15 104.478   3
   7   4   1 1135.77 111.523   2
   7   4   1 1026.03 121.197   6
   6  -4  -1 186527. 1184.17   4
  -6  -4   1 195168. 1434.11   4
   6   4   1 187407. 1405.35   6
  -6   4  -1 198158. 912.106   3
   6  -4  -1 186772. 1226.81   3
  -6  -4   1 180314. 1341.16   5
  -6   4  -1 177074. 938.298   5
   6   4   1 196812. 1339.85   2
   5   4   1 223.724 95.8003   4
   5   4   1 841.558 101.567   6
   5   4   1 893.755 95.6422   2
   5  -4  -1 666.949 95.1944   4
   5  -4  -1 907.871 95.3011   3
  -5   4  -1 891.382 56.8681   2
  -5  -4   1 843.553 102.411   5
  -5   4  -1 873.475 77.2060   5
   4  -4  -1 6539.65 221.303   3
   4  -4  -1 6625.75 249.146   4
  -4  -4   1 6361.66 236.115   5
   4   4   1 6445.14 224.448   2
   4   4   1 6610.93 251.133   6
   4   4   1 7046.63 287.374   4
  -4   4  -1 6388.88 181.426   5
  -4   4  -1 6729.14 155.832   2
  -3   4  -1 10.3125 33.5900   6
   3   4   1 20.4715 39.5168   2
  -3  -4   1 115.038 62.5170   2
  -3   4  -1-24.5706 40.4334   5
  -3  -4   1-94.1788 80.7216   6
   3   4   1 46.8529 66.9096   4
   3   4   1 26.5695 50.2278   6
  -3   4  -1 15.0176 30.7520   2
   3  -4  -1-148.539 67.6665   4
  -3  -4   1 8.50190 43.9435   5
   3  -4  -1 25.8058 33.9502   5
  -2   4  -1 31388.5 385.095   2
  -2  -4   1 31992.5 504.879   2
  -2  -4   1 30623.9 472.462   5
  -2  -4   1 32608.8 542.204   6
   2  -4  -1 30274.9 538.392   4
   2   4   1 31470.7 467.191   2
  -2   4  -1 29089.8 405.973   5
  -2   4  -1 31835.4 384.753   6
   2   4   1 30397.7 493.953   6
   2  -4  -1 31440.4 470.574   6
   2   4   1 29871.5 572.797   4
   2  -4  -1 31858.8 371.641   5
   1   4   1 979.846 95.3097   6
  -1   4  -1 936.296 76.9029   2
   1   4   1 922.093 83.9104   2
  -1   4  -1 1042.61 85.1893   6
   1  -4  -1 973.052 96.2143   6
   1  -4  -1 938.035 82.1559   5
  -1  -4   1 1032.30 95.8409   2
  -1  -4   1 916.735 90.7039   5
   1  -4  -1 915.890 82.2992   5
   1   4   1 931.676 113.592   4
  -1   4  -1 926.286 85.4952   5
  -1  -4   1 1042.91 105.824   6
   1  -4  -1 992.835 112.395   4
   1  -4  -1 155.039 54.4046   2
   0   4  -1-23.9737 47.9468   5
   0  -4  -1 35.0642 49.9350   5
   0  -4   1 62.6540 44.0642   5
   0   4  -1 54.4349 40.5068   2
   0   4   1 42.2932 44.1146   6
   0  -4   1 47.8360 47.2229   6
   0  -4  -1-23.4777 61.7677   4
   0  -4  -1 12.3385 47.1744   6
   0   4   1 20.6047 35.5251   2
   0   4  -1 1.53736 45.3460   6
   0  -4   1 99.7062 50.3900   2
   0  -4  -1-18.6978 42.7706   2
   0   4   1 43.5969 71.3081   4
   1  -4   1 1081.12 92.6505   6
   1  -4   1 977.229 82.6778   2
  -1   4   1 900.921 86.3140   6
   1   4  -1 1020.32 91.9200   2
   1  -4   1 973.451 81.4007   5
  -1   4   1 975.786 85.2411   2
  -1  -4  -1 1067.56 101.666   5
  -1   4   1 785.055 105.168   4
   1   4  -1 774.839 85.9668   5
  -1  -4  -1 997.307 117.621   4
   1   4  -1 1055.99 99.8932   6
  -1  -4  -1 261.232 68.7432   6
   2  -4   1 29346.7 381.617   5
  -2   4   1 31000.4 436.487   2
   2   4  -1 31605.1 479.411   3
  -2  -4  -1 31628.1 513.492   5
   2   4  -1 33153.5 501.652   2
  -2   4   1 31142.4 449.044   6
  -2   4   1 30537.7 561.004   4
   2   4  -1 32706.8 516.020   6
   2  -4   1 32535.1 388.849   2
   2  -4   1 34356.5 415.479   6
  -2  -4  -1 30087.9 569.977   4
   2   4  -1 31912.3 502.341   5
  -3   4   1 24.3110 42.3956   6
   3   4  -1 8.86505 51.2776   6
   3  -4   1-14.3607 36.8705   5
   3   4  -1 55.6480 46.0441   3
  -3  -4  -1 54.4628 56.1144   5
   3   4  -1 61.3902 52.4046   2
  -3  -4  -1-126.146 73.3548   4
  -3   4   1 38.3062 67.0460   4
   3  -4   1 60.7711 37.5214   2
  -3   4   1 1.57969 34.9992   2
   3   4  -1 12.5783 69.1392   4
  -4   4   1 6296.26 250.244   4
   4   4  -1 7017.95 267.895   6
   4  -4   1 6614.53 146.353   2
   4  -4   1 6787.68 179.546   5
   4   4  -1 7188.18 294.907   4
  -4  -4  -1 6534.62 260.922   5
  -4   4   1 6707.65 205.158   2
   4   4  -1 6943.86 251.914   2
  -4  -4  -1 6388.94 271.048   4
  -4   4   1 7013.94 218.567   6
   4   4  -1 6777.90 241.321   3
   5   4  -1 977.216 133.728   4
   5  -4   1 1011.10 77.4358   5
   5   4  -1 1057.90 132.043   6
   5   4  -1 1006.72 103.821   3
  -5  -4  -1 824.103 113.892   4
  -5  -4  -1 839.566 109.241   5
  -5   4   1 967.117 89.4777   2
   5   4  -1 992.717 104.989   2
  -5   4   1 878.775 105.315   4
  -6   4   1 183209. 1270.45   4
  -6  -4  -1 183268. 1448.56   4
   6   4  -1 188152. 1371.42   2
   6   4  -1 190740. 1369.19   3
   6  -4   1 183135. 931.101   5
  -6   4   1 186693. 1105.28   2
   6   4  -1 192798. 1487.70   6
  -6  -4  -1 189484. 1495.12   5
   7  -4   1 1198.43 86.7769   5
  -7  -4  -1 1115.90 130.554   4
  -7  -4  -1 1002.15 131.030   5
   7   4  -1 1315.00 126.974   2
  -7   4   1 1204.39 99.8232   2
   7   4  -1 1287.50 123.997   3
  -7   4   1 1050.51 109.241   4
   7   4  -1 1174.18 139.267   6
   8   4  -1 3137.47 190.064   2
  -8   4   1 2901.96 160.752   4
  -8  -4  -1 2925.92 206.355   5
   8  -4   1 3161.99 135.839   5
   8   4  -1 3099.01 191.827   3
   8   4  -1 3287.24 214.457   6
  -8   4   1 3155.49 153.500   2
  -8  -4  -1 2940.69 195.771   4
   9  -4   1 465.913 57.2483   3
   9   4  -1 314.273 76.0207   2
  -9  -4  -1 475.768 110.469   4
   9   4  -1 393.329 81.8808   3
   9   4  -1 473.594 114.853   6
  -9   4   1 137.397 63.4787   4
   9  -4   1 432.893 64.7534   5
  -9  -4  -1 123.152 73.7253   5
  -9   4   1 265.709 56.5267   2
  10   4  -1 146856. 1361.39   2
 -10   4   1 145355. 1014.78   4
 -10   4   1 147365. 1082.22   2
 -10  -4  -1 148796. 1356.24   4
  10   4  -1 146624. 1356.07   3
  10   4  -1 145720. 1471.61   6
 -10  -4  -1 149097. 1537.10   5
  10  -4   1 147064. 1018.42   5
  10  -4   1 148792. 901.929   3
 -11   4   1 981.128 63.5915   5
 -11  -4  -1 1213.36 139.036   4
  11  -4   1 537.326 47.7242   2
  11   4  -1 771.259 138.749   6
  11   4  -1 607.221 98.8248   3
  11  -4   1 767.479 90.2930   5
  11  -4   1 690.468 73.1613   3
 -11   4   1 897.672 92.8512   2
 -11   4   1 799.280 80.6612   4
 -11  -4  -1 1068.27 161.378   5
 -12  -4  -1 113.463 64.0612   4
  12  -4   1 56.2218 32.7847   2
  12  -4   1-0.34525 22.8587   6
  12   4  -1 66.8224 63.9113   3
 -12   4   1 21.5891 33.2485   5
  12  -4   1 48.8839 37.4711   3
 -12   4   1 17.1437 45.7150   4
  12   4  -1 133.272 86.0669   6
 -12  -4  -1-41.5858 72.6011   5
  12  -4   1-46.3635 61.2856   5
 -12   4   1-60.0815 50.2047   2
  13  -4   1 218.020 51.7227   3
 -13  -4  -1 138.775 84.4882   5
 -13   4   1 127.864 45.6263   4
 -13   4   1 296.903 55.0558   5
 -13   4   1 214.681 59.7999   2
  13   4  -1 180.543 87.2746   6
 -13  -4  -1 372.370 92.2948   4
  13  -4   1 272.122 73.7486   5
  13  -4   1 165.374 34.4456   6
  13   4  -1 241.153 79.2702   3
 -14   4   1 13308.9 358.137   2
  14  -4   1 12594.2 247.277   6
  14   4  -1 13597.1 498.553   6
  14   4  -1 13525.4 321.792   4
 -14  -4  -1 13119.4 422.278   4
 -14   4   1 14640.1 300.826   5
  14  -4   1 13711.9 330.691   3
 -14  -4  -1 13875.8 541.123   5
  14   4  -1 12730.9 446.635   3
  15   4  -1 62.0919 94.8033   6
  15  -4   1 61.2932 44.5034   6
 -15   4   1 26.9708 60.2333   5
 -15  -4  -1 151.809 73.7412   4
  15   4  -1 140.099 74.3985   3
 -15   4   1 97.7707 47.1028   2
  15   4  -1 89.5485 43.5398   4
  15  -4   1-24.7046 50.4921   3
 -15  -4  -1 115.904 104.709   5
 -16  -4  -1 2144.36 226.520   5
  16   4  -1 2191.10 127.222   4
  16   4  -1 1994.53 191.578   3
 -16   4   1 2689.12 161.607   5
  16   4  -1 1917.70 212.088   6
 -16  -4  -1 2370.52 188.410   4
 -16   4   1 2234.35 159.398   2
  16  -4   1 2257.39 151.786   3
  16  -4   1 2047.31 122.281   6
  17   4  -1 37.1299 82.5613   6
 -17  -4  -1 55.6653 95.4249   5
  17   4  -1 15.5906 67.1575   3
 -17   4   1-20.8318 67.6450   5
 -17   4   1 21.1293 48.1312   2
  17  -4   1 59.0733 49.5520   6
 -17  -4  -1-85.1728 87.1410   4
  17  -4   1 51.2287 48.6705   3
  17   4  -1-179.779 109.965   4
  17   4  -1-95.2875 59.8610   4
 -18   4   1 64.5590 74.8040   5
  18   4  -1 141.021 85.3551   3
 -18  -4  -1-13.6160 92.7085   5
 -18   4   1 100.975 70.5316   2
  18   4  -1 85.4349 46.2679   4
  18   4  -1-45.9268 68.3352   4
  18  -4   1-8.61596 50.4069   6
  18   4  -1-60.3873 86.0965   6
  18  -4   1 33.2717 51.4139   3
 -18  -4  -1 68.0122 75.3254   4
  19   4  -1 1919.48 228.103   6
 -19  -4  -1 1146.68 200.790   5
  19   4  -1 2003.94 106.250   4
  19  -4   1 1803.39 150.295   3
  19  -4   1 1800.16 134.613   6
  19   4  -1 1725.13 198.125   3
 -19   4   1 1432.83 144.472   2
 -19   4   1 1447.29 149.774   5
 -19  -4  -1 1318.93 157.972   4
  19   4  -1 1930.11 130.936   4
 -20  -4  -1 11900.1 561.582   5
  20   4  -1 11491.2 493.443   3
 -20   4   1 12723.1 410.456   2
  20   4  -1 11104.1 265.562   4
  20   4  -1 10983.1 500.190   6
  20  -4   1 11855.9 382.836   3
  20  -4   1 11340.3 330.440   6
  20   4  -1 10942.2 215.465   4
 -20   4   1 13912.8 430.232   5
 -20  -4  -1 11595.3 421.556   4
 -21  -4  -1 686.503 168.426   5
 -21   4   1 759.972 125.110   2
 -21   4   1 875.365 141.648   5
 -21  -4  -1 856.621 137.634   4
  21  -4   1 704.763 109.112   3
  21  -4   1 947.988 117.635   6
 -22   4   1 26146.4 636.448   5
  22  -4   1 23240.0 564.500   3
 -22  -4  -1 23142.8 810.075   5
 -22   4   1 23184.7 578.985   2
 -22  -4  -1 21935.7 592.115   4
  22  -4   1 22396.5 499.849   6
  23  -4   1 794.645 116.472   6
 -23  -4  -1 729.984 136.605   4
 -23  -4  -1 642.484 188.665   5
 -23   4   1 982.105 156.412   5
  23  -4   1 708.782 110.178   3
 -23   4   1 875.356 131.408   2
 -24  -4  -1 79.9649 135.566   5
 -24   4   1 53.1373 109.163   5
  24  -4   1 138.392 75.2064   3
 -24  -4  -1 9.54337 93.3151   4
  24  -4   1 79.4530 61.8041   6
 -24   4   1 91.7409 88.4102   2
 -25  -4  -1 35.6515 95.3908   4
 -25  -4  -1-115.489 136.975   5
  25  -4   1 54.7190 62.7894   6
 -25   4   1-1.96260 117.875   5
  25   4  -1 136.459 146.308   6
  25  -4   1 24.2831 58.5674   3
  25   4  -1 218.107 136.182   3
 -25   4   1 27.8272 74.4763   2
 -26   4   1 1565.83 175.203   2
 -26   4   1 1705.31 208.059   5
 -26  -4  -1 1535.20 259.532   5
  26  -4   1 1674.57 177.809   3
  26   4  -1 1599.06 233.514   6
  26   4  -1 1360.79 214.949   3
  26  -4   1 1292.48 148.066   6
 -26  -4  -1 1301.37 175.741   4
  27   4  -1 293.274 156.390   3
  27  -4   1 328.638 109.290   6
 -27  -4  -1 347.497 176.053   5
 -27   4   1 506.981 169.672   5
  27  -4   1 439.850 113.365   3
 -27   4   1 281.843 99.9409   2
 -27  -4  -1 250.181 118.381   4
  27   4  -1 430.978 172.887   6
  28   4  -1 143.219 142.473   3
  28  -4   1 47.3653 73.2835   3
 -28  -4  -1 26.9133 101.652   4
 -28  -4  -1-57.9968 156.947   5
 -28   4   1 6.03894 86.4427   2
 -28   4   1-47.0540 130.268   5
  28   4  -1 68.0426 143.056   6
  28  -4   1 143.379 95.9681   6
  29  -4   1 238.166 107.456   3
 -29   4   1 261.262 169.825   5
  29   4  -1 350.204 162.427   3
  29   4  -1 508.326 207.705   6
 -29  -4  -1 372.897 207.700   5
  29  -4   1 331.028 107.350   6
 -29  -4  -1 99.7109 112.560   4
 -29   4   1 248.825 115.159   2
 -30   4   1 735.208 168.078   2
  30  -4   1 340.947 112.577   6
 -30   4   1 531.462 177.042   5
 -30  -4  -1 471.084 211.784   5
  30   4  -1 520.768 187.304   6
  30   4  -1 598.639 175.732   3
 -30  -4  -1 182.975 114.097   4
  31  -4   1-58.0800 95.0415   6
 -31  -4  -1-95.4796 138.817   4
  31   4  -1 56.9002 172.640   3
  31   4  -1-28.0239 147.165   6
 -31   4   1-95.6554 103.075   2
 -31  -4  -1 318.500 227.447   5
 -31   4   1-41.2422 162.267   5
 -32   4   1 526.246 162.072   2
  32   4  -1 358.552 182.474   6
 -32  -4  -1 42.5715 214.863   5
  32  -4   1 255.843 114.908   6
 -32  -4  -1 140.229 144.209   4
 -32   4   1 212.171 174.600   5
  32   4  -1 399.681 192.203   3
 -33   4   1-64.2245 139.766   2
  33  -4   1 208.328 149.201   3
  33   4  -1 33.2229 164.290   3
  33   4  -1-243.620 184.102   6
 -33  -4  -1 296.966 238.189   5
 -33  -4  -1 171.139 152.395   4
  33  -4   1 205.107 122.900   6
 -33   4   1 182.079 181.338   5
 -34   4   1 291.245 202.173   5
 -34  -4  -1-85.0310 178.786   4
 -34   4   1 72.7416 126.716   2
 -34  -4  -1-280.741 253.793   5
  34  -4   1-112.017 129.668   6
  34  -4   1-150.144 135.733   3
  34   4  -1-36.1239 183.508   6
  34   4  -1-108.488 152.248   3
  35  -4   1 77.9641 124.993   3
 -35  -4  -1 167.318 248.599   5
 -35  -4  -1 67.2374 193.433   4
 -35   4   1-76.7591 206.005   5
  35   4  -1-236.156 213.829   6
  35   4  -1 56.2452 172.493   3
 -35   4   1 130.435 150.081   2
 -36  -4  -1 1573.27 365.256   5
  36   4  -1 1504.23 313.534   6
 -36  -4  -1 1452.55 283.618   4
 -36   4   1 1570.40 233.477   2
 -36   4   1 2085.22 344.133   5
  36   4  -1 1573.22 287.242   3
  36  -4   1 1523.41 232.260   3
 -37  -4  -1-247.448 268.028   5
 -37   4   1-64.6816 256.072   5
  37   4  -1-160.810 206.192   6
  37   4  -1 361.227 219.083   3
 -37  -4  -1-113.836 241.781   4
 -37   4   1-97.0874 156.773   2
  37  -4   1 60.6595 141.585   3
 -38   4   1 3125.09 322.092   2
 -38  -4  -1 3101.90 467.659   5
  38   4  -1 2619.41 354.754   6
 -38   4   1 2854.39 406.026   5
  38   4  -1 2738.00 372.790   3
 -38  -4  -1 2306.03 334.519   4
  38  -4   1 2851.37 305.764   3
 -39   4   1-78.1944 194.661   2
  39   4  -1 95.2286 190.090   3
  39   4  -1-131.818 208.607   6
  39  -4   1 150.256 149.370   3
  40  -4   1-46.4138 145.819   3
  40   4  -1 178.717 197.551   3
 -40  -4  -1-127.260 269.712   5
  40   4  -1 71.0080 191.355   6
 -40   4   1 300.432 193.576   2
 -41   4   1 360.488 214.716   2
  41  -4   1 281.408 185.960   3
 -41  -4  -1 123.792 281.079   5
  41   4  -1 130.153 204.092   3
  41   4  -1 34.5293 194.382   6
 -41  -4  -1 210.864 244.505   2
 -42  -4  -1-133.935 248.496   2
  42  -4   1 68.8280 152.098   3
  42   4  -1 13.2894 201.622   6
  42   4  -1 45.0795 206.291   3
 -42  -4  -1 317.947 313.577   5
 -42   4   1 256.390 214.858   2
 -43  -4  -1 8.23096 332.872   5
 -43  -4  -1 198.779 283.831   2
  43  -4   1-466.852 221.147   3
  43   4  -1-30.1513 206.475   3
 -43   4   1 641.639 260.302   2
  43   4  -1-70.6663 207.632   6
 -42  -5   1 1419.33 306.332   2
 -42  -5   1 1525.75 385.279   5
  42  -5  -1 1013.52 239.194   3
  42   5   1 1245.76 346.068   6
  42   5   1 1537.72 311.768   3
  41   5   1-36.4916 195.250   3
  41  -5  -1-203.976 178.399   6
  41  -5  -1 210.426 176.615   3
 -41  -5   1-286.321 256.946   2
 -41  -5   1 153.578 320.877   5
  41   5   1-179.792 231.759   6
 -40  -5   1 24.4740 215.312   2
  40  -5  -1-3.36761 148.309   6
  40  -5  -1 121.410 160.199   3
 -40  -5   1 33.4594 268.295   5
  40   5   1 159.463 218.921   6
  40   5   1 266.964 190.388   3
  39   5   1 25.8318 201.843   6
 -39  -5   1-73.1795 203.410   2
  39  -5  -1 310.138 165.397   6
  39  -5  -1 23.3072 145.901   3
 -39  -5   1-133.632 243.829   5
  39   5   1 142.528 173.454   3
 -39   5  -1 115.282 310.885   5
  38   5   1 1226.56 284.477   6
  38   5   1 1394.84 266.049   3
 -38  -5   1 1686.61 316.850   2
  38  -5  -1 1006.67 197.034   6
 -38  -5   1 1575.85 318.480   4
 -38  -5   1 1080.44 309.804   5
 -38   5  -1 1362.45 366.098   5
  38  -5  -1 1621.00 269.336   3
 -37  -5   1 41.9473 216.367   5
 -37  -5   1 584.023 276.921   4
 -37  -5   1 486.807 194.618   2
  37   5   1 133.130 182.313   3
  37   5   1 271.387 211.761   6
 -37   5  -1 557.408 300.669   5
  37  -5  -1 469.873 174.051   6
  37  -5  -1 250.027 172.108   3
  36   5   1 1132.49 268.633   3
 -36  -5   1 1178.35 295.308   4
 -36  -5   1 1108.31 264.315   2
  36   5   1 552.009 213.189   6
 -36   5  -1 891.265 288.410   5
  36  -5  -1 702.552 176.382   6
  36  -5  -1 631.322 182.080   3
 -36  -5   1 1137.42 305.427   5
 -35  -5   1 589.766 256.891   5
 -35   5  -1 714.912 254.705   5
 -35  -5   1 704.317 240.533   2
  35   5   1 1320.23 279.034   6
 -35   5  -1 1091.32 186.767   2
  35  -5  -1 1146.60 201.689   6
  35  -5  -1 1180.74 225.018   3
 -35  -5   1 710.753 218.650   4
  35   5   1 1544.27 273.254   3
  34   5   1 373.019 211.418   6
  34  -5  -1 200.496 138.981   6
  34   5   1 139.641 153.200   3
 -34  -5   1 324.790 208.033   5
 -34   5  -1 529.126 258.917   5
  34  -5  -1 383.814 172.313   3
 -34   5  -1 526.565 154.389   2
 -34  -5   1 430.496 211.941   4
 -34  -5   1 320.061 179.102   2
  33  -5  -1 184.429 128.386   6
  33   5   1-93.8801 155.629   3
 -33  -5   1 341.786 214.962   4
 -33  -5   1 160.843 178.643   2
  33   5   1 146.710 184.074   6
 -33  -5   1 263.405 213.581   5
 -33   5  -1-104.512 188.241   5
 -33   5  -1 65.7715 120.036   2
  33  -5  -1 236.296 161.497   3
  32  -5  -1 546.628 177.734   3
  32   5   1 323.126 194.353   6
 -32  -5   1 940.407 239.303   4
 -32  -5   1 639.232 247.012   5
 -32   5  -1 430.399 130.918   2
  32   5   1 247.859 170.047   3
 -32   5  -1 589.160 215.692   5
 -31   5  -1 316.862 127.415   2
 -31  -5   1 54.2166 153.651   4
  31   5   1 377.925 188.571   3
 -31  -5   1 308.597 210.365   5
 -31   5  -1 59.2117 150.952   5
  31   5   1 150.867 198.066   6
  31  -5  -1 390.238 164.569   3
 -30   5  -1 741.037 201.808   5
 -30  -5   1 385.657 200.756   5
  30   5   1 538.852 219.182   6
  30  -5  -1 609.281 167.002   3
 -30  -5   1 890.701 203.108   4
  30   5   1 332.551 138.279   3
 -30   5  -1 702.371 132.795   2
 -29  -5   1 85.4329 178.031   5
  29  -5  -1-156.927 126.296   3
  29   5   1 52.8624 133.520   3
 -29   5  -1 88.8624 103.371   2
 -29   5  -1-66.6640 140.032   5
  29   5   1-51.3777 174.743   6
 -29  -5   1-96.9493 146.465   4
 -28  -5   1 529.047 196.534   5
 -28   5  -1 578.514 177.585   5
  28  -5  -1 358.862 98.6424   6
  28   5   1 426.061 128.709   2
 -28  -5   1 501.975 168.809   4
  28  -5  -1 195.134 116.361   3
  28   5   1 357.080 191.245   6
  28   5   1 170.254 144.129   3
 -28   5  -1 490.125 109.815   2
 -27   5  -1 468.060 99.0228   2
  27  -5  -1 521.237 142.885   3
  27   5   1 563.907 188.755   6
  27   5   1 577.346 164.772   3
 -27  -5   1 428.098 165.661   5
 -27   5  -1 519.938 167.585   5
 -27  -5   1 342.836 134.587   4
  27  -5  -1 459.494 109.062   6
 -26   5  -1 176.596 162.661   5
  26   5   1 181.431 150.189   6
  26  -5  -1 19.3811 79.9417   6
 -26  -5   1 92.0432 142.849   5
 -26   5  -1-120.391 90.5629   2
 -26  -5   1 174.162 127.258   4
 -25   5  -1 404.752 98.1503   2
 -25   5  -1 196.530 115.416   5
  25   5   1 162.473 37.1840   4
 -25  -5   1 489.828 183.741   5
  25  -5  -1 340.097 99.9474   6
 -25  -5   1 200.297 118.978   4
 -24  -5   1 712.869 156.528   4
 -24  -5   1 271.229 157.153   5
 -24   5  -1 429.438 137.420   5
 -24   5  -1 432.072 88.8699   2
  24   5   1-116.953 72.4828   4
  24  -5  -1 452.474 106.989   6
 -23  -5   1 352.756 161.219   5
  23  -5  -1 397.949 105.863   6
 -23   5  -1 432.317 135.016   5
 -23   5  -1 447.318 86.6565   2
  23   5   1 233.741 106.804   2
 -23  -5   1 480.843 141.754   4
 -22  -5   1 9009.09 421.284   4
 -22   5  -1 9355.73 423.420   5
  22  -5  -1 9048.69 418.639   3
  22   5   1 9410.31 458.092   2
 -22  -5   1 8817.29 484.804   5
  22   5   1 8250.33 413.634   3
 -22   5  -1 9703.27 293.873   2
  22  -5  -1 8776.08 355.274   6
  21   5   1 1642.04 190.635   2
 -21  -5   1 2462.03 263.143   5
  21   5   1 1571.72 186.782   3
  21  -5  -1 1988.86 169.892   6
  21  -5  -1 2176.25 210.777   3
 -21  -5   1 2454.33 232.696   4
 -21   5  -1 2459.09 148.308   2
  21   5   1 1445.73 204.520   6
 -21   5  -1 2445.57 226.045   5
 -20   5  -1 5112.77 298.847   5
 -20  -5   1 5600.50 332.887   4
  20  -5  -1 5448.27 272.599   6
  20   5   1 5270.74 320.402   2
  20   5   1 5031.67 320.061   3
  20   5   1 5341.01 366.401   6
  20  -5  -1 5621.69 323.263   3
 -20  -5   1 5173.52 361.393   5
 -20   5  -1 5665.96 207.702   2
  19  -5  -1 3196.14 239.752   3
 -19   5  -1 3333.25 154.480   2
  19  -5  -1 3016.01 201.599   6
  19   5   1 2746.58 269.292   6
  19   5   1 3005.72 241.131   2
 -19   5  -1 3182.75 208.724   6
 -19  -5   1 3076.12 245.449   4
 -19  -5   1 2952.12 272.876   5
  19  -5  -1 2242.43 167.952   5
 -19   5  -1 3398.14 242.399   5
  19   5   1 2880.26 242.837   3
  18   5   1 5848.13 371.862   6
 -18   5  -1 6097.85 252.507   6
 -18  -5   1 6234.17 376.872   5
  18  -5  -1 6347.57 330.894   3
  18  -5  -1 5032.39 221.130   5
  18   5   1 5938.42 328.961   3
 -18   5  -1 6454.67 317.046   5
 -18  -5   1 6953.56 357.410   4
  18  -5  -1 6342.21 283.521   6
 -18   5  -1 6784.91 207.407   2
  18   5   1 5951.45 327.156   2
 -17  -5   1 13038.3 524.106   5
  17  -5  -1 13265.8 329.682   5
  17   5   1 15463.5 594.306   6
  17  -5  -1 15067.4 419.816   6
 -17   5  -1 13708.1 346.916   6
  17   5   1 14541.9 501.534   3
  17  -5  -1 15163.8 487.155   3
 -17  -5   1 13751.1 488.763   4
  17   5   1 14555.4 496.172   2
 -17   5  -1 14580.0 283.985   2
  16  -5  -1 2207.83 185.959   3
  16   5   1 2193.84 201.978   2
  16  -5  -1 2147.68 161.956   6
  16   5   1 2165.43 191.847   3
 -16  -5   1 1939.43 217.262   5
  16   5   1 2138.35 227.151   6
  16  -5  -1 1645.49 116.457   5
 -16   5  -1 2263.90 141.568   6
 -16  -5   1 2250.78 207.570   4
 -16   5  -1 2197.56 109.619   2
  15  -5  -1 83.8423 56.4266   6
  15  -5  -1 53.8984 47.5673   5
  15   5   1 40.0008 69.7591   2
  15   5   1 110.021 78.0454   3
 -15   5  -1 30.1962 34.7812   2
  15  -5  -1 58.2855 57.2153   3
 -15  -5   1 53.8369 91.0850   4
  15   5   1 187.466 99.7215   6
 -15  -5   1 2.59953 82.0557   5
 -15   5  -1 134.144 60.0444   6
  14   5   1 44.9689 72.6814   6
 -14  -5   1 225.971 95.9270   4
 -14   5  -1 47.3384 35.7498   2
  14   5   1 114.534 78.8668   2
  14   5   1 71.2416 65.5904   3
 -14   5  -1 245.296 59.3254   6
  14  -5  -1 85.7212 42.4011   5
 -14  -5   1 15.4660 84.5195   5
  14  -5  -1 133.076 58.2705   6
  14  -5  -1 51.4715 56.5804   3
 -13  -5   1 298.393 110.045   4
  13   5   1 121.109 82.9384   6
  13  -5  -1 276.159 80.0382   3
 -13   5  -1 207.936 36.2629   2
  13  -5  -1 185.013 56.1555   6
  13  -5  -1 175.550 39.1234   5
 -13  -5   1 136.657 87.4057   5
 -13   5  -1 303.396 52.1332   6
  13   5   1 177.383 78.3214   2
  13   5   1 96.4366 57.3678   3
 -12   5  -1 6491.18 149.754   2
  12   5   1 7019.67 315.349   2
  12  -5  -1 7097.43 300.916   3
 -12  -5   1 7697.75 364.283   4
  12   5   1 6849.12 346.627   6
  12  -5  -1 7116.36 254.300   6
  12   5   1 6918.73 309.711   3
 -12   5  -1 6278.14 206.851   5
 -12  -5   1 6708.37 334.737   5
  11   5   1 457.928 92.2416   2
 -11  -5   1 574.102 125.391   4
 -11  -5   1 463.304 102.808   5
 -11   5  -1 458.613 43.9523   2
  11   5   1 518.166 97.2400   3
 -11   5  -1 389.560 60.8593   5
  11  -5  -1 464.988 82.2531   3
  11  -5  -1 545.387 81.9595   6
 -11   5  -1 195.517 68.4972   3
  11   5   1 385.698 99.6799   6
 -10  -5   1 946.497 133.802   5
  10  -5  -1 1235.89 128.017   3
 -10   5  -1 1063.21 88.3014   5
 -10   5  -1 1052.95 61.4977   2
  10   5   1 1180.32 147.124   6
 -10  -5   1 1255.92 152.453   4
  10   5   1 1247.64 133.336   2
 -10   5  -1 951.689 85.6514   3
  -9   5  -1 568.211 71.1418   3
  -9  -5   1 622.971 126.338   4
   9   5   1 333.371 92.6210   6
   9   5   1 312.690 85.9226   2
  -9  -5   1 396.219 84.5092   5
   9  -5  -1 401.997 81.9753   3
  -9   5  -1 411.024 42.0289   2
  -9   5  -1 560.331 67.8154   5
   8   5   1 144091. 1269.05   2
  -8  -5   1 140479. 1361.57   5
  -8   5  -1 146287. 942.011   3
   8  -5  -1 142487. 1191.07   3
  -8   5  -1 141595. 699.422   2
  -8   5  -1 139103. 867.997   5
   8  -5  -1 147203. 1054.30   4
   8   5   1 142907. 1381.75   6
  -8  -5   1 156891. 1474.28   4
  -7   5  -1 30.0287 42.2448   5
   7  -5  -1 120.226 75.9011   4
   7   5   1 132.714 69.0293   6
  -7  -5   1-21.0265 69.4753   5
  -7   5  -1 41.1555 34.8202   3
   7  -5  -1 13.7305 50.0854   3
   7   5   1 111.998 57.6171   2
  -7   5  -1 114.200 37.7336   2
  -7  -5   1-81.8781 82.6739   4
  -6  -5   1 3315.20 213.454   4
  -6  -5   1 3093.26 193.461   5
   6  -5  -1 3582.69 185.765   3
   6  -5  -1 3257.15 185.984   4
   6   5   1 3443.64 213.029   6
   6   5   1 3840.97 205.914   2
  -6   5  -1 3504.35 124.167   2
  -6   5  -1 3166.23 136.976   5
   5   5   1 5469.83 235.040   2
   5  -5  -1 5052.80 238.975   4
  -5   5  -1 6184.40 167.133   2
   5   5   1 5065.73 245.730   6
  -5   5  -1 5434.69 178.800   5
  -5  -5   1 5784.87 248.850   5
  -5  -5   1 6184.21 276.356   4
   4   5   1 129494. 1072.59   2
   4  -5  -1 134182. 680.091   5
  -4   5  -1 131436. 751.970   6
  -4   5  -1 128862. 789.680   2
  -4  -5   1 126814. 1114.59   5
  -4   5  -1 125741. 865.801   5
   4  -5  -1 131185. 1183.92   4
   4   5   1 131316. 1175.79   6
   4  -5  -1 129380. 731.779   5
   3  -5  -1 127.276 49.2143   5
   3   5   1 230.440 60.8320   2
  -3   5  -1 195.956 53.6189   2
   3  -5  -1 81.3970 79.7506   4
   3   5   1 158.353 62.6067   6
  -3  -5   1 216.862 65.2315   5
  -3   5  -1 158.755 54.5128   6
   3  -5  -1 193.217 50.9772   5
  -3   5  -1 248.084 60.4092   5
   2  -5  -1 329.904 62.5284   5
   2   5   1 284.293 64.2432   2
  -2  -5   1 62.6548 77.0576   6
   2   5   1 279.680 74.4206   6
  -2   5  -1 217.782 62.7546   5
   2  -5  -1 249.122 82.5293   4
  -2   5  -1 293.192 58.1712   2
  -2  -5   1 242.563 71.6672   5
   2   5   1 40.2010 77.8990   5
  -2   5  -1 302.984 61.9637   6
   1   5   1 90.2020 65.6662   5
  -1  -5   1 43.3036 69.2178   6
  -1   5  -1 144.833 65.2171   6
  -1   5  -1 87.2375 58.9667   5
  -1  -5   1 118.275 56.7670   5
   1  -5  -1 195.643 69.9326   5
   1  -5  -1 61.9940 73.0361   4
   1   5   1 76.1392 59.0073   6
  -1  -5   1 8.91905 63.9904   2
  -1   5  -1 111.327 51.7339   2
   1   5   1 138.246 56.9152   2
   0   5   1 179653. 1159.83   2
   0   5  -1 180711. 1148.91   2
   0  -5   1 186624. 1196.46   2
   0   5   1 179853. 1229.35   6
   0  -5  -1 180267. 1169.71   5
   0  -5   1 191286. 1257.43   6
   0  -5   1 178418. 1137.48   5
   0   5  -1 182191. 1176.15   6
   0  -5  -1 180565. 1479.40   4
   1   5  -1 38.1056 48.2000   2
  -1  -5  -1 58.5220 64.5539   5
  -1   5   1 34.4378 89.6783   4
  -1  -5  -1 198.375 85.4940   4
   1  -5   1 165.794 57.8567   5
  -1   5   1 204.123 63.5579   6
   1   5  -1 94.2991 66.9164   6
  -1   5   1 163.509 53.9691   2
   1  -5   1 81.2146 49.5303   2
   1  -5   1 92.8075 53.3964   6
  -2  -5  -1 354.924 97.6140   4
  -2  -5  -1 368.350 81.1817   5
   2  -5   1 193.457 58.1465   6
  -2   5   1 211.400 89.9687   4
   2  -5   1 300.242 61.8978   5
  -2   5   1 290.840 61.9956   2
   2   5  -1 253.107 66.4730   6
   2   5  -1 293.966 65.8940   2
  -2   5   1 268.845 63.2969   6
   2  -5   1 197.839 52.7684   2
  -3   5   1 289.972 67.8484   6
  -3   5   1 188.037 57.1103   2
  -3  -5  -1 164.407 76.9917   5
  -3   5   1 57.7863 77.0255   4
   3  -5   1 183.320 48.3904   2
   3  -5   1 259.140 56.3813   5
   3  -5   1 227.564 54.0812   6
   3   5  -1 165.682 56.8707   2
   3   5  -1 247.737 71.0819   3
  -3  -5  -1 165.980 74.0602   4
   3   5  -1 241.881 75.0987   6
   4  -5   1 129604. 767.553   2
   4   5  -1 130806. 1132.32   3
   4   5  -1 133480. 1196.86   6
  -4   5   1 131734. 1258.30   4
   4  -5   1 131176. 833.208   5
  -4   5   1 131846. 977.532   6
   4  -5   1 130819. 720.697   6
  -4  -5  -1 128535. 1301.86   4
  -4   5   1 132391. 969.831   2
   4   5  -1 132466. 1137.06   2
  -4  -5  -1 133840. 1226.77   5
  -5  -5  -1 4922.34 268.591   4
   5  -5   1 5989.11 177.545   5
  -5  -5  -1 5245.38 260.328   5
   5   5  -1 5995.81 254.052   3
   5   5  -1 6158.57 276.782   6
  -5   5   1 5532.87 202.928   2
  -5   5   1 4498.06 239.564   4
  -5   5   1 5394.94 201.664   6
   5   5  -1 6580.80 270.177   2
   5  -5   1 6068.63 155.335   2
  -6   5   1 3672.22 171.634   6
   6   5  -1 3514.51 206.320   2
  -6  -5  -1 3422.56 226.328   4
  -6  -5  -1 3735.13 231.596   5
   6   5  -1 3217.36 192.821   3
  -6   5   1 3303.17 203.927   4
   6  -5   1 3367.25 133.257   5
  -6   5   1 3568.79 164.387   2
   6   5  -1 3260.86 206.811   6
   6  -5   1 3506.57 110.132   2
   7  -5   1 58.2378 29.2321   2
   7   5  -1-0.88314 72.3388   6
  -7   5   1 116.409 52.9244   2
   7   5  -1-47.0501 79.7703   2
  -7   5   1-115.479 99.2626   4
   7  -5   1 73.2460 45.4138   5
  -7  -5  -1 32.1895 70.8076   4
  -7  -5  -1 94.9925 84.0323   5
   7   5  -1 88.8450 57.0923   3
  -8  -5  -1 149197. 1523.88   5
  -8   5   1 144555. 1060.66   2
   8   5  -1 146095. 1347.48   2
  -8  -5  -1 144805. 1434.47   4
  -8   5   1 148067. 1248.91   4
   8   5  -1 145410. 1332.44   3
   8  -5   1 146706. 658.753   2
   8  -5   1 143889. 888.791   5
   8   5  -1 142521. 1413.92   6
  -9   5   1 100.904 83.4621   4
   9   5  -1 521.934 91.5095   2
  -9  -5  -1 250.300 81.9480   4
   9   5  -1 510.978 93.4300   3
  -9   5   1 363.762 65.0529   2
   9  -5   1 496.721 63.9406   5
   9   5  -1 599.355 119.087   6
  -9  -5  -1 243.502 96.3083   5
   9  -5   1 545.060 45.1516   2
 -10  -5  -1 1247.64 170.383   5
  10  -5   1 1115.94 93.4135   5
  10   5  -1 1045.71 143.301   6
  10   5  -1 980.653 123.733   3
 -10   5   1 961.984 113.665   4
  10  -5   1 1123.25 63.1427   2
  10   5  -1 1001.82 130.548   2
 -10  -5  -1 1252.19 151.126   4
 -10   5   1 1287.63 111.362   2
 -11  -5  -1 454.603 115.147   5
  11  -5   1 478.961 64.0158   3
  11  -5   1 607.348 54.9206   2
  11  -5   1 481.707 72.4711   5
  11   5  -1 501.868 101.783   3
 -11   5   1 323.342 69.0555   4
  11   5  -1 475.094 92.5025   2
 -11   5   1 505.866 74.1812   2
 -11  -5  -1 315.947 93.2878   4
  11   5  -1 503.807 112.920   6
  12   5  -1 6670.27 347.175   6
 -12   5   1 6244.08 237.029   4
 -12   5   1 6885.49 248.465   2
 -12  -5  -1 6737.38 326.588   4
 -12  -5  -1 6760.09 364.807   5
  12  -5   1 6799.13 232.208   5
  12  -5   1 7087.12 228.721   3
  12   5  -1 6930.77 322.220   2
  12  -5   1 6957.89 170.168   2
  12   5  -1 6608.63 316.745   3
  13  -5   1 357.650 77.8567   5
  13   5  -1 305.761 101.097   6
  13   5  -1 304.542 82.4524   3
 -13  -5  -1 156.705 80.9078   4
  13   5  -1 263.627 82.0991   2
  13  -5   1 354.001 64.6040   3
 -13  -5  -1 279.418 113.158   5
 -13   5   1 235.434 65.1939   2
  13  -5   1 166.883 26.2578   6
 -13   5   1 178.764 71.5833   4
  13  -5   1 240.460 42.6100   2
 -13   5   1 104.714 29.0565   5
  14   5  -1-39.1438 69.6605   3
 -14  -5  -1 89.6992 74.6402   4
 -14   5   1 51.5396 49.6808   2
  14  -5   1 29.8713 27.0501   6
  14   5  -1-53.1193 98.3262   6
 -14   5   1 263.591 81.0275   4
  14  -5   1 76.9196 37.2793   2
 -14  -5  -1 283.148 118.626   5
  14  -5   1-28.1605 60.4383   5
  14  -5   1-6.82136 45.3943   3
 -14   5   1 82.9809 37.1848   5
  14   5  -1 74.5153 67.4569   2
  15  -5   1 58.2539 40.3936   3
  15  -5   1 76.6365 47.6078   2
  15   5  -1 20.7702 89.5375   6
  15  -5   1 129.160 39.2680   6
 -15   5   1 48.1833 46.8191   2
 -15   5   1 139.002 56.1527   4
  15   5  -1-41.4702 62.4500   3
 -15  -5  -1 194.174 93.7336   4
 -15  -5  -1 180.020 115.959   5
 -15   5   1 13.6710 42.2646   5
  16   5  -1 2113.63 209.348   3
 -16   5   1 1181.78 108.201   4
 -16   5   1 2451.14 132.557   5
 -16  -5  -1 1822.49 182.692   4
 -16   5   1 2231.59 160.380   2
 -16  -5  -1 2162.05 241.204   5
  16  -5   1 2179.79 149.028   3
  16   5  -1 2127.59 228.171   6
  16  -5   1 2016.11 108.446   6
  17  -5   1 14470.0 388.478   3
 -17  -5  -1 14168.2 590.785   5
  17   5  -1 13082.8 497.912   3
  17   5  -1 13830.0 350.601   4
  17  -5   1 14169.3 288.801   6
  17   5  -1 13464.1 547.796   6
 -17   5   1 8123.68 241.987   4
 -17  -5  -1 13915.1 484.843   4
 -17   5   1 16435.2 356.848   5
 -17   5   1 15083.8 417.576   2
 -18  -5  -1 5316.53 376.032   5
  18  -5   1 6479.24 268.102   3
 -18  -5  -1 5484.75 313.132   4
 -18   5   1 2928.56 139.769   4
 -18   5   1 6229.16 277.612   2
 -18   5   1 6663.39 251.989   5
  18  -5   1 6311.98 206.261   6
  18   5  -1 5841.45 345.416   3
  18   5  -1 6120.01 378.566   6
  18   5  -1 6654.34 243.053   4
 -19   5   1 2956.20 198.344   2
 -19  -5  -1 2885.41 298.295   5
  19   5  -1 2758.81 243.360   3
 -19   5   1 3498.97 202.954   5
  19  -5   1 2886.72 148.773   6
  19   5  -1 3339.20 165.515   4
 -19  -5  -1 2756.90 229.513   4
  19  -5   1 3137.46 193.350   3
  19   5  -1 3142.23 286.495   6
 -20   5   1 6585.31 282.626   5
 -20   5   1 5473.25 271.904   2
  20  -5   1 5285.24 206.738   6
  20  -5   1 5648.62 267.382   3
  20   5  -1 5204.22 197.526   4
 -20  -5  -1 4875.93 374.782   5
 -20  -5  -1 5199.87 315.660   4
 -21  -5  -1 1710.71 242.221   5
  21  -5   1 2390.35 149.302   6
 -21  -5  -1 1497.36 176.223   4
  21  -5   1 2458.33 187.833   3
  21   5  -1 2403.56 131.922   4
 -21   5   1 1982.19 173.027   2
 -21   5   1 2212.49 188.035   5
 -22  -5  -1 6950.94 462.475   5
  22  -5   1 8544.65 283.734   6
  22   5  -1 8097.07 280.801   4
  22   5  -1 8906.55 229.598   4
 -22   5   1 10776.3 398.067   5
  22  -5   1 9232.92 360.448   3
 -22   5   1 9049.70 360.064   2
 -22  -5  -1 8161.99 394.628   4
  23   5  -1 209.610 58.7077   4
  23  -5   1 364.132 76.2208   6
 -23   5   1 490.587 133.376   5
 -23  -5  -1 180.815 140.523   5
 -23   5   1 365.585 99.2585   2
 -23  -5  -1 189.052 103.080   4
  23   5  -1 339.028 47.6897   4
  23  -5   1 290.526 80.7164   3
 -24   5   1 428.260 108.778   2
  24   5  -1 368.238 137.524   3
[truncated: 2,525,819 more chars]
